# Supplementary material for: Stereoselective benzylic C(sp 3 )–H alkenylation enabled by metallaphotoredox catalysis
Source: Royal Society of Chemistry journal article supplement (doi:10.1039/d4sc02830a), 2024-01-01
Supplement: d4sc02830a1.pdf [file d4sc02830a1.pdf]

# SUPLUMMENTARY INFORMATION

## Stereoselective Benzylic C(*sp*<sup>3</sup>)-H Alkenylation Enabled by Metallaphotoredox catalysis

Yantao Li,<sup>a</sup> Haonan Bai,<sup>a</sup> Qi Gao,<sup>a</sup> Kai Liu,<sup>a</sup> Jie Han,<sup>a</sup> Weipeng Li,<sup>a</sup> Chengjian Zhu<sup>\*ab</sup>, and  
Jin Xie<sup>\*a</sup>

- a. State Key Laboratory of Coordination Chemistry, Jiangsu Key Laboratory of Advanced Organic Materials, Chemistry and Biomedicine Innovation Center (ChemBIC), School of Chemistry and Chemical Engineering, Nanjing University, Nanjing 210023, China
- b. Green Catalysis Center, and College of Chemistry, Zhengzhou University, Zhengzhou 450001, China

### Table of Contents

|                                                     |     |
|-----------------------------------------------------|-----|
| 1. General information .....                        | 2   |
| 2. Preparation of substrates .....                  | 2   |
| 3. General procedure .....                          | 9   |
| 4. Characterization of products .....               | 11  |
| 5. Investigation of the reaction mechanism.....     | 37  |
| 5.1 Radical inhibition experiments with TEMPO ..... | 37  |
| 5.2 Byproducts detected experiments.....            | 37  |
| 5.3 Kinetic experiments.....                        | 38  |
| 5.4 Luminescence quenching experiment .....         | 44  |
| 5.5 The reactivity of Z/E vinyl triflates .....     | 44  |
| 6. NMR spectrum of substrates.....                  | 49  |
| 7. NMR spectrum of products .....                   | 78  |
| 8. HPLC analysis.....                               | 144 |
| 9. Definition of the absolute configuration .....   | 160 |
| 10. DFT calculations .....                          | 164 |
| 11. Reference.....                                  | 170 |

---

## 1. General information

All the reactions were conducted in oven-dried Schlenk tubes under air unless otherwise noted. All solvents were purified by Solvent Purification System. Reagents were purchased from Energy Chemical, TCI and etc. Flash column chromatographic purification of products was accomplished using forced-flow chromatography on Silica Gel (300-400 mesh). <sup>1</sup>H NMR, <sup>13</sup>C NMR and <sup>19</sup>F NMR spectra were recorded on a 400 MHz or 500 MHz spectrometer in CDCl<sub>3</sub> ( $\delta$  H = 7.26 ppm,  $\delta$  C = 77.0 ppm as standard). Data for <sup>1</sup>H NMR are reported as follows: chemical shift (ppm, scale), multiplicity, coupling constant (Hz), and integration. Data for <sup>13</sup>C NMR are reported in terms of chemical shift (ppm, scale), multiplicity, and coupling constant (Hz). Abbreviations for signal couplings are: s, singlet; d, doublet; t, triplet; m, multiple. GC-MS analyses were performed on a GC-MS with an EI mode. High resolution mass spectra were obtained using an Agilent 6210 Series TOF LC-MS equipped with electrospray ionization (ESI) probe operating in positive ion mode. Melting points (mp) were determined with a digital electrothermal apparatus without further correction. IR spectra were recorded on a Thermo Scientific Nicolet 380 FT-IR spectrometer. The 45 W blue LED lamps ( $\lambda_{\text{max}} = 455$  nm) were purchased from Kessil (A360NE/WE). High pressure liquid chromatography (HPLC) was performed on Agilent 1260 Series chromatographs using Daicel Chiralcel or Chiralpak columns (250 mm). Optical rotations were measured on a Rudolph Research Analytical Autopol VI automatic polarimeter using a 50 mm pathlength cell at 589 nm with  $[\alpha]_{\text{D}}$  values reported in degrees; concentration (c) is in g/100 mL.

## 2. Preparation of substrates

### Method A: General Procedure for the Synthesis of (*Z*)-Enol Triflates

The starting acetoacetate derivative (4 mmol) was added to a round-bottom flask and dissolved in either hexanes or toluene (20 mL, 0.2M). The solution was cooled with an ice bath to 5-10°C (internal temperature) followed by addition of a saturated aqueous solution of LiOH (6 mL, ~30 mmol) in one portion. The resulting biphasic mixture was *vigorously stirred* at 5-10°C for ~5 minutes followed by the addition of triflic anhydride (10 mmol) dropwise at a rate to maintain the internal temperature between 5-15 °C. Upon completion of the reaction (as judged by TLC, typically <10 min), the biphasic solution was diluted with H<sub>2</sub>O (5mL) and the layers were separated. The aqueous layer was extracted with EtOAc (1 x 10mL). The combined organic layers were washed with H<sub>2</sub>O (1 x 5mL), brine (1 x 5mL), and dried over MgSO<sub>4</sub>. The organic layer was filtered and concentrated under reduced pressure to yield the corresponding crude (*Z*)-enol triflate.<sup>[1]</sup>

### Method B: General Procedure for the Synthesis of (*E*)-Enol Triflates

The starting acetoacetate derivative (4 mmol) was added to a round-bottom flask and dissolved in either hexanes or toluene (20 mL, 0.2M). The solution was cooled with an ice bath to 5-10°C (internal temperature), followed by addition of an aqueous solution of tetramethylammonium hydroxide (7.2 mL of a 25 wt% solution in water, 20 mmol) in one portion. The resulting

biphasic mixture was *vigorously stirred* at 5- 10°C for ~5 minutes followed by the addition of triflic anhydride (10 mmol) dropwise at a rate to maintain the internal temperature between 5- 15 °C. Upon completion of reaction (as judged by TLC, typically <10 min), the biphasic solution was diluted with H<sub>2</sub>O (5mL) and the layers were separated. The aqueous layer was extracted with EtOAc (1 x 10mL). The combined organic layers were washed with H<sub>2</sub>O (1 x 5mL), brine (1 x 5mL), and dried over MgSO<sub>4</sub>. The organic layer was filtered and concentrated under reduced pressure to yield the corresponding crude (*E*)-enol triflate.<sup>[1]</sup>

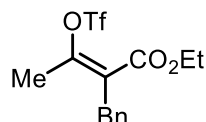

*ethyl (Z)-2-benzyl-3-(((trifluoromethyl)sulfonyl)oxy)but-2-enoate (2a)*.<sup>[1]</sup> Method **A**. On 1.0 mmol scale; purified by flash column chromatography on SiO<sub>2</sub> (eluent: petroleum ether/ethyl acetate) to afford **2a**, 299.2 mg, 85%, light yellow oil; R<sub>f</sub> = 0.5 (petroleum ether/ethyl acetate 10:1). <sup>1</sup>H NMR (400 MHz, Chloroform-*d*) δ 7.32 – 7.24 (m, 2H), 7.23 – 7.14 (m, 3H), 4.18 (q, *J* = 7.1 Hz, 2H), 3.72 (s, 2H), 2.18 (s, 3H), 1.19 (t, *J* = 7.1 Hz, 3H). <sup>13</sup>C NMR (101 MHz, Chloroform-*d*) δ 164.88, 149.14, 136.77, 128.72, 128.05, 126.86, 125.41, 118.37 (q, *J* = 319.9 Hz), 61.78, 35.02, 17.80, 13.75. <sup>19</sup>F NMR (376 MHz, Chloroform-*d*) δ -74.73. <sup>1</sup>H NMR spectrum for compound **2a**

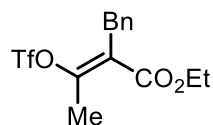

*ethyl (E)-2-benzyl-3-(((trifluoromethyl)sulfonyl)oxy)but-2-enoate (2a')*.<sup>[1]</sup> Method **B**. On 1.0 mmol scale; purified by flash column chromatography on SiO<sub>2</sub> (eluent: petroleum ether/ethyl acetate) to afford **2a'**, 232.3 mg, 66%, light yellow oil; R<sub>f</sub> = 0.47 (petroleum ether/ethyl acetate 10:1). <sup>1</sup>H NMR (400 MHz, Chloroform-*d*) δ 7.30 – 7.23 (m, 2H), 7.22 – 7.17 m, 3H), 4.12 (q, *J* = 7.1 Hz, 2H), 3.81 (s, 2H), 2.46 (s, 3H), 1.14 (t, *J* = 7.1 Hz, 3H). <sup>13</sup>C NMR (101 MHz, Chloroform-*d*) δ 165.83, 153.70, 137.26, 128.50, 126.68, 126.40, 118.27 (q, *J* = 319.7 Hz), 61.54, 33.69, 18.93, 13.84. <sup>19</sup>F NMR (376 MHz, Chloroform-*d*) δ -74.45.

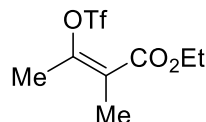

*ethyl (Z)-2-methyl-3-(((trifluoromethyl)sulfonyl)oxy)but-2-enoate (2b)*.<sup>[1]</sup> Method **A**. On 1.0 mmol scale; purified by flash column chromatography on SiO<sub>2</sub> (eluent: petroleum ether/ethyl acetate) to afford **2b**, 234.6 mg, 85%, light yellow oil; R<sub>f</sub> = 0.6 (petroleum ether/ethyl acetate 10:1). <sup>1</sup>H NMR (400 MHz, Chloroform-*d*) δ 4.30 – 4.24 (m, 2H), 2.08 (d, *J* = 1.5 Hz, 3H), 1.92 (t, *J* = 1.4 Hz, 3H), 1.26 (t, *J* = 7.1 Hz, 3H). <sup>13</sup>C NMR (101 MHz, Chloroform-*d*) δ 165.21, 147.54, 121.75, 118.23 (q, *J* = 319.7 Hz), 61.54, 17.41, 14.98, 13.67. <sup>19</sup>F NMR (376 MHz, Chloroform-*d*) δ -75.08.

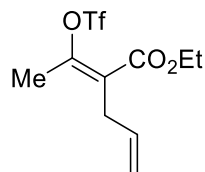

*ethyl (Z)-2-(1-(((trifluoromethyl)sulfonyl)oxy)ethylidene)pent-4-enoate (2c)*.<sup>[1]</sup> Method A. On 1.0 mmol scale; purified by flash column chromatography on SiO<sub>2</sub> (eluent: petroleum ether/ethyl acetate) to afford **2c**, 235.6 mg, 78%, light yellow oil; R<sub>f</sub> = 0.4 (petroleum ether/ethyl acetate 10:1). <sup>1</sup>H NMR (400 MHz, Chloroform-*d*) δ 5.83 – 5.73(m, 1H), 5.15 – 5.09 (m, 2H), 4.27 (q, *J* = 7.2 Hz, 2H), 3.11 – 3.08(m, 2H), 2.13 (s, 3H), 1.31 (t, *J* = 7.1 Hz, 3H). <sup>13</sup>C NMR (101 MHz, Chloroform-*d*) δ 164.85, 149.00, 132.46, 123.99, 118.30 (q, *J* = 319.7 Hz), 116.95, 61.81, 33.25, 17.56, 13.90. <sup>19</sup>F NMR (376 MHz, Chloroform-*d*) δ -74.67.

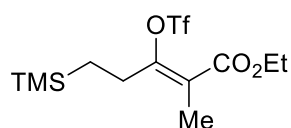

*ethyl (Z)-2-methyl-3-(((trifluoromethyl)sulfonyl)oxy)-5-(trimethylsilyl)pent-2-enoate (2d)*.<sup>[1]</sup> Method A. On 1.0 mmol scale; purified by flash column chromatography on SiO<sub>2</sub> (eluent: petroleum ether/ethyl acetate) to afford **2d**, 314.9 mg, 87%, light yellow oil; R<sub>f</sub> = 0.7 (petroleum ether/ethyl acetate 10:1). <sup>1</sup>H NMR (400 MHz, Chloroform-*d*) δ 4.26 (q, *J* = 7.1 Hz, 2H), 2.39 – 2.35 (m, 2H), 1.96 (s, 3H), 1.32 (t, *J* = 7.1 Hz, 3H), 0.81 – 0.77 (m, 2H), 0.03 (s, 9H). <sup>13</sup>C NMR (101 MHz, Chloroform-*d*) δ 165.59, 153.47, 120.21, 118.31 (q, *J* = 320.0 Hz), 61.64, 25.81, 14.87, 13.84, 13.39, -2.22. <sup>19</sup>F NMR (376 MHz, Chloroform-*d*) δ -74.95.

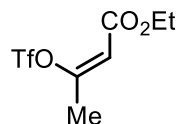

*ethyl (Z)-3-(((trifluoromethyl)sulfonyl)oxy)but-2-enoate (2e)*.<sup>[1]</sup> Method A. On 1.0 mmol scale; purified by flash column chromatography on SiO<sub>2</sub> (eluent: petroleum ether/ethyl acetate) to afford **2e**, 152.0 mg, 58%, light yellow oil; R<sub>f</sub> = 0.6 (petroleum ether/ethyl acetate 10:1). <sup>1</sup>H NMR (400 MHz, Chloroform-*d*) δ 5.77 (s, 1H), 4.25 (q, *J* = 7.1 Hz, 2H), 2.17 (s, 3H), 1.30 (t, *J* = 7.1 Hz, 3H). <sup>13</sup>C NMR (101 MHz, Chloroform-*d*) δ 162.28, 155.06, 118.30 (q, *J* = 319.8 Hz), 112.78, 61.18, 20.82, 13.96. <sup>19</sup>F NMR (376 MHz, Chloroform-*d*) δ -74.77.

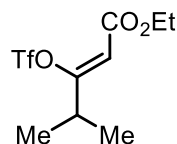

*ethyl (Z)-4-methyl-3-(((trifluoromethyl)sulfonyl)oxy)pent-2-enoate (2f)*.<sup>[1]</sup> Method A. On 1.0 mmol scale; purified by flash column chromatography on SiO<sub>2</sub> (eluent: petroleum ether/ethyl acetate) to afford **2f**, 191.4 mg, 66%, light yellow oil; R<sub>f</sub> = 0.7 (petroleum ether/ethyl acetate 10:1). <sup>1</sup>H NMR (400 MHz, Chloroform-*d*) δ 5.77 (s, 1H), 4.26 (q, *J* = 7.1 Hz, 2H), 2.62 (h, *J* = 6.8 Hz, 1H), 1.31 (t, *J* = 7.1 Hz, 3H), 1.21 (d, *J* = 6.7 Hz, 6H). <sup>13</sup>C NMR (101 MHz, Chloroform-*d*) δ 163.99, 162.76, 118.36 (q, *J* = 320.1 Hz), 109.81, 61.24, 33.34, 19.69, 13.99. <sup>19</sup>F NMR

(376 MHz, Chloroform-*d*)  $\delta$  -74.67.

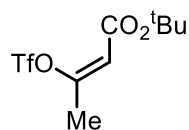

*tert*-butyl (*Z*)-3-(((trifluoromethyl)sulfonyl)oxy)but-2-enoate (**2g**).<sup>[1]</sup> Method A. On 1.0 mmol scale; purified by flash column chromatography on SiO<sub>2</sub> (eluent: petroleum ether/ethyl acetate) to afford **2g**, 246.5 mg, 85%, light yellow oil; R<sub>f</sub> = 0.6 (petroleum ether/ethyl acetate 10:1). <sup>1</sup>H NMR (400 MHz, Chloroform-*d*)  $\delta$  5.69 (s, 1H), 2.12 (s, 3H), 1.50 (s, 9H). <sup>13</sup>C NMR (101 MHz, Chloroform-*d*)  $\delta$  161.53, 153.59, 118.32 (q, *J* = 319.9 Hz), 114.41, 82.33, 27.89, 20.55. <sup>19</sup>F NMR (376 MHz, Chloroform-*d*)  $\delta$  -74.77.

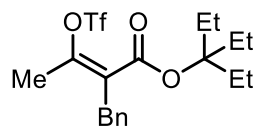

3-ethylpentan-3-yl (*Z*)-2-benzyl-3-(((trifluoromethyl)sulfonyl)oxy)but-2-enoate (**2h**). Method A. On 1.0 mmol scale; purified by flash column chromatography on SiO<sub>2</sub> (eluent: petroleum ether/ethyl acetate) to afford **2h**, 177.2 mg, 42%, light yellow oil; R<sub>f</sub> = 0.7 (petroleum ether/ethyl acetate 10:1). <sup>1</sup>H NMR (400 MHz, Chloroform-*d*)  $\delta$  7.31 – 7.27 (m, 2H), 7.23 – 7.18 (m, 3H), 3.69 (s, 2H), 2.17 (s, 3H), 1.76 (q, *J* = 7.5 Hz, 6H), 0.66 (t, *J* = 7.5 Hz, 9H). <sup>13</sup>C NMR (101 MHz, Chloroform-*d*)  $\delta$  163.34, 148.40, 136.88, 128.65, 128.02, 126.76, 126.29, 118.39 (q, *J* = 320.0 Hz), 91.48, 35.27, 26.71, 17.56, 7.44. <sup>19</sup>F NMR (376 MHz, Chloroform-*d*)  $\delta$  -74.50. HRMS (ESI) Calculated for C<sub>19</sub>H<sub>25</sub>F<sub>3</sub>O<sub>5</sub>S [M+K]<sup>+</sup>: 461.1006, found: 461.1002. IR  $\nu$  (neat, cm<sup>-1</sup>): 2998.5, 1759.4, 1497.1, 1200.8, 1124.3, 997.2, 873.0.

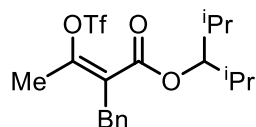

2,4-dimethylpentan-3-yl (*Z*)-2-benzyl-3-(((trifluoromethyl)sulfonyl)oxy)but-2-enoate (**2i**). Method A. On 1.0 mmol scale; purified by flash column chromatography on SiO<sub>2</sub> (eluent: petroleum ether/ethyl acetate) to afford **2i**, 265.9 mg, 63%, light yellow oil; R<sub>f</sub> = 0.6 (petroleum ether/ethyl acetate 10:1). <sup>1</sup>H NMR (400 MHz, Chloroform-*d*)  $\delta$  7.29 (dd, *J* = 8.4, 6.4 Hz, 2H), 7.22 – 7.18 (m, 3H), 4.68 (t, *J* = 6.1 Hz, 1H), 3.77 (s, 2H), 2.21 (s, 3H), 1.88 – 1.77 (m, *J* = 6.7 Hz, 2H), 0.72 (dd, *J* = 9.7, 6.8 Hz, 12H). <sup>13</sup>C NMR (101 MHz, Chloroform-*d*)  $\delta$  164.29, 150.16, 136.85, 128.71, 127.89, 126.80, 124.87, 118.39 (q, *J* = 320.0 Hz), 84.58, 34.92, 29.20, 19.25, 17.98, 17.06. <sup>19</sup>F NMR (376 MHz, Chloroform-*d*)  $\delta$  -74.51. HRMS (ESI) Calculated for C<sub>19</sub>H<sub>25</sub>F<sub>3</sub>O<sub>5</sub>S [M+K]<sup>+</sup>: 461.1006, found: 461.1003. IR  $\nu$  (neat, cm<sup>-1</sup>): 3001.4, 1700.5, 1492.5, 1240.8, 1200.5, 997.2, 805.2.

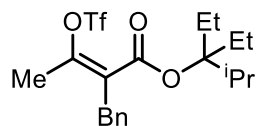

*3-ethyl-2-methylpentan-3-yl (Z)-2-benzyl-3-(((trifluoromethyl)sulfonyl)oxy)but-2-enoate (2j)*. Method A. On 1.0 mmol scale; purified by flash column chromatography on SiO<sub>2</sub> (eluent: petroleum ether/ethyl acetate) to afford **2j**, 231.1 mg, 53%, light yellow oil; R<sub>f</sub> = 0.6 (petroleum ether/ethyl acetate 10:1). <sup>1</sup>H NMR (400 MHz, Chloroform-*d*) δ 7.31 – 7.27 (m, 2H), 7.22 – 7.17 (m, 3H), 3.71 (s, 2H), 2.28 (hept, *J* = 7.0 Hz, 1H), 2.16 (s, 3H), 1.89 – 1.86 (m, *J* = 7.4 Hz, 4H), 0.80 (d, *J* = 7.0 Hz, 6H), 0.73 (t, *J* = 7.6 Hz, 6H). <sup>13</sup>C NMR (101 MHz, Chloroform-*d*) δ 163.46, 148.44, 136.77, 128.67, 127.94, 126.87 – 126.67 (m), 126.34, 118.40 (q, *J* = 319.9 Hz), 93.50, 35.16, 33.59, 26.68, 17.54, 8.56. <sup>19</sup>F NMR (376 MHz, Chloroform-*d*) δ -74.55. HRMS (ESI) Calculated for C<sub>20</sub>H<sub>27</sub>F<sub>3</sub>O<sub>5</sub>S [M+K]<sup>+</sup>: 471.1163, found: 471.1156. IR ν (neat, cm<sup>-1</sup>): 3012.4, 1754.1, 1495.6, 1200.5, 1180.2, 997.5, 780.3.

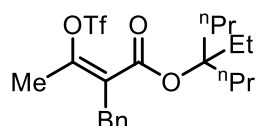

*4-ethylheptan-4-yl (Z)-2-benzyl-3-(((trifluoromethyl)sulfonyl)oxy)but-2-enoate (2k)*. Method A. On 1.0 mmol scale; purified by flash column chromatography on SiO<sub>2</sub> (eluent: petroleum ether/ethyl acetate) to afford **2k**, 248.1 mg, 55%, light yellow oil; R<sub>f</sub> = 0.6 (petroleum ether/ethyl acetate 10:1). <sup>1</sup>H NMR (400 MHz, Chloroform-*d*) δ 7.31 – 7.26 (m, 2H), 7.23 – 7.17 (m, 3H), 3.68 (s, 2H), 2.17 (s, 3H), 1.75 (q, *J* = 7.5 Hz, 2H), 1.69 – 1.64 (m, 4H), 1.11 – 1.01 (m, 4H), 0.79 (t, *J* = 7.3 Hz, 6H), 0.67 (t, *J* = 7.5 Hz, 3H). <sup>13</sup>C NMR (101 MHz, Chloroform-*d*) δ 163.40, 148.15, 136.82, 128.63, 128.05, 126.75, 126.41, 118.38 (q, *J* = 320.1 Hz), 91.00, 37.02, 35.29, 27.77, 17.51, 16.40, 14.38, 7.60. <sup>19</sup>F NMR (376 MHz, Chloroform-*d*) δ -74.49. HRMS (ESI) Calculated for C<sub>21</sub>H<sub>29</sub>F<sub>3</sub>O<sub>5</sub>S [M+K]<sup>+</sup>: 489.1319, found: 489.1312. IR ν (neat, cm<sup>-1</sup>): 3080.5, 1780.4, 1490.2, 1250.3, 1197.8, 998.1, 785.6, 605.4.

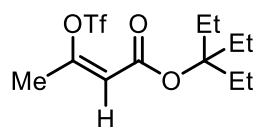

*3-ethylpentan-3-yl (Z)-3-(((trifluoromethyl)sulfonyl)oxy)but-2-enoate (2l)*. Method A. On 1.0 mmol scale; purified by flash column chromatography on SiO<sub>2</sub> (eluent: petroleum ether/ethyl acetate) to afford **2l**, 285.5 mg, 86%, light yellow oil; R<sub>f</sub> = 0.4 (petroleum ether/ethyl acetate 10:1). <sup>1</sup>H NMR (400 MHz, Chloroform-*d*) δ 5.73 (d, *J* = 1.1 Hz, 1H), 2.13 (d, *J* = 0.9 Hz, 3H), 1.87 (q, *J* = 7.5 Hz, 6H), 0.82 (t, *J* = 7.5 Hz, 9H). <sup>13</sup>C NMR (101 MHz, Chloroform-*d*) δ 161.12, 154.16, 118.33 (q, *J* = 319.8 Hz), 114.03, 90.41, 26.64, 20.66, 7.51. <sup>19</sup>F NMR (376 MHz, Chloroform-*d*) δ -74.78. HRMS (ESI) Calculated for C<sub>12</sub>H<sub>19</sub>F<sub>3</sub>O<sub>5</sub>S [M+K]<sup>+</sup>: 371.0537, found: 371.0534. IR ν (neat, cm<sup>-1</sup>): 2987.5, 1756.3, 1500.2, 1250.7, 1244.9, 750.2, 698.7.

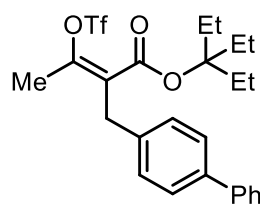

*3-ethylpentan-3-yl (Z)-2-([1,1'-biphenyl]-4-ylmethyl)-3-(((trifluoromethyl)sulfonyl)oxy)but-2-enoate (2m)*. Method A. On 1.0 mmol scale; purified by flash column chromatography on SiO<sub>2</sub>

(eluent: petroleum ether/ethyl acetate) to afford **2m**, 194.2 mg, 39%, light yellow oil; R<sub>f</sub> = 0.6 (petroleum ether/ethyl acetate 10:1). <sup>1</sup>H NMR (400 MHz, Chloroform-*d*) δ 7.57 – 7.52 (m, 4H), 7.43 (m, 7.44 – 7.41, 2H), 7.33 (m, 7.35 – 7.31, 1H), 7.26 (m, 7.27 – 7.24, 2H), 3.73 (s, 2H), 2.19 (s, 3H), 1.77 (q, *J* = 7.5 Hz, 6H), 0.67 (t, *J* = 7.5 Hz, 9H). <sup>13</sup>C NMR (101 MHz, Chloroform-*d*) δ 163.38, 148.40, 140.79, 139.79, 135.99, 128.79, 128.49, 127.39, 127.27, 127.00, 118.42 (q, *J* = 319.9 Hz), 91.62, 34.99, 26.75, 17.62, 7.49. <sup>19</sup>F NMR (376 MHz, Chloroform-*d*) δ -74.42. HRMS (ESI) Calculated for C<sub>25</sub>H<sub>29</sub>F<sub>3</sub>O<sub>5</sub>S [M+Na]<sup>+</sup>: 521.1580, found: 521.1571. IR ν (neat, cm<sup>-1</sup>): 2893.1, 1834.2, 1572.1, 1207.3, 996.2, 758.7.

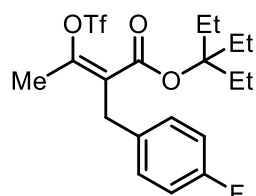

*3-ethylpentan-3-yl (Z)-2-(4-fluorobenzyl)-3-(((trifluoromethyl)sulfonyl)oxy)but-2-enoate (2n)*. Method A. On 1.0 mmol scale; purified by flash column chromatography on SiO<sub>2</sub> (eluent: petroleum ether/ethyl acetate) to afford **2n**, 250.8 mg, 57%, light yellow oil; R<sub>f</sub> = 0.6 (petroleum ether/ethyl acetate 10:1). <sup>1</sup>H NMR (400 MHz, Chloroform-*d*) δ 7.17 – 7.14 (m, 2H), 7.00 – 6.96 (m, 2H), 3.66 (s, 2H), 2.17 (s, 3H), 1.76 (q, *J* = 7.5 Hz, 6H), 0.67 (t, *J* = 7.5 Hz, 9H). <sup>13</sup>C NMR (101 MHz, Chloroform-*d*) δ 163.10 (d, *J* = 21.5 Hz), 160.56, 148.42, 132.56 (d, *J* = 3.3 Hz), 129.51 (d, *J* = 8.0 Hz), 126.23, 118.37 (q, *J* = 319.9 Hz), 115.45 (d, *J* = 21.4 Hz), 91.64, 34.51, 26.69, 17.50, 7.42. <sup>19</sup>F NMR (376 MHz, Chloroform-*d*) δ -74.51, -116.24. HRMS (ESI) Calculated for C<sub>19</sub>H<sub>24</sub>F<sub>4</sub>O<sub>5</sub>S [M+K]<sup>+</sup>: 479.0912, found: 479.0906. IR ν (neat, cm<sup>-1</sup>): 3001.2, 1748.3, 1500.4, 1480.6, 1238.1, 804.2, 731.2.

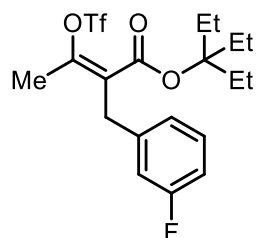

*3-ethylpentan-3-yl (Z)-2-(4-fluorobenzyl)-3-(((trifluoromethyl)sulfonyl)oxy)but-2-enoate (2o)*. Method A. On 1.0 mmol scale; purified by flash column chromatography on SiO<sub>2</sub> (eluent: petroleum ether/ethyl acetate) to afford **2o**, 233.5 mg, 53%, light yellow oil; R<sub>f</sub> = 0.8 (petroleum ether/ethyl acetate 10:1). <sup>1</sup>H NMR (400 MHz, Chloroform-*d*) δ 7.29 – 7.23 (m, 1H), 6.99 – 6.97 (m, 1H), 6.93 – 6.89 (m, 1H), 3.69 (s, 2H), 2.17 (s, 3H), 1.77 (q, *J* = 7.5 Hz, 6H), 0.68 (t, *J* = 7.5 Hz, 9H). <sup>13</sup>C NMR (101 MHz, Chloroform-*d*) δ 163.65 (d, *J* = 117.6 Hz), 161.79, 148.88, 139.51 (d, *J* = 7.3 Hz), 130.15 (d, *J* = 8.3 Hz), 125.69, 123.62 (d, *J* = 2.9 Hz), 118.37 (q, *J* = 320.0 Hz), 115.03 (d, *J* = 22.0 Hz), 113.70 (d, *J* = 20.9 Hz), 91.71, 34.96, 26.68, 17.60, 7.41. <sup>19</sup>F NMR (376 MHz, Chloroform-*d*) δ -74.50, -101.37 – -116.29 (m). HRMS (ESI) Calculated for C<sub>19</sub>H<sub>24</sub>F<sub>4</sub>O<sub>5</sub>S [M+K]<sup>+</sup>: 479.0912, found: 479.0911. IR ν (neat, cm<sup>-1</sup>): 2997.3, 1748.2, 1518.2, 1476.8, 1203.7, 1145.8, 824.2.

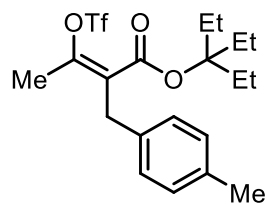

*3-ethylpentan-3-yl (Z)-2-(4-methylbenzyl)-3-(((trifluoromethyl)sulfonyl)oxy)but-2-enoate*

**(2p)**. Method A. On 1.0 mmol scale; purified by flash column chromatography on SiO<sub>2</sub> (eluent: petroleum ether/ethyl acetate) to afford **2p**, 266.0 mg, 61%, light yellow oil; R<sub>f</sub> = 0.5 (petroleum ether/ethyl acetate 10:1). <sup>1</sup>H NMR (500 MHz, Chloroform-*d*) δ 7.08 (q, *J* = 8.2 Hz, 3H), 3.65 (s, 2H), 2.31 (s, 3H), 2.15 (s, 3H), 1.77 (q, *J* = 7.5 Hz, 6H), 0.66 (s, 9H). <sup>13</sup>C NMR (126 MHz, Chloroform-*d*) δ 163.44, 148.16, 136.29, 133.71, 129.28, 127.88, 126.48, 118.36 (q, *J* = 320.5 Hz), 91.43, 34.8, 26.71, 20.97, 17.51, 7.46. <sup>19</sup>F NMR (471 MHz, Chloroform-*d*) δ -74.46. HRMS (ESI) Calculated for C<sub>20</sub>H<sub>27</sub>F<sub>3</sub>O<sub>5</sub>S [M+Na]<sup>+</sup>: 459.1424, found: 459.1427. IR ν (neat, cm<sup>-1</sup>): 2890.2, 1740.2, 1404.2, 1240.6, 1128.1, 689.4.

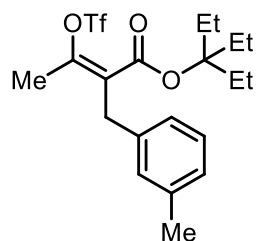

*3-ethylpentan-3-yl (Z)-2-(3-methylbenzyl)-3-(((trifluoromethyl)sulfonyl)oxy)but-2-enoate (2q)*

Method A. On 1.0 mmol scale; purified by flash column chromatography on SiO<sub>2</sub> (eluent: petroleum ether/ethyl acetate) to afford **2q**, 204.9 mg, 47%, light yellow oil; R<sub>f</sub> = 0.5 (petroleum ether/ethyl acetate 10:1). <sup>1</sup>H NMR (400 MHz, Chloroform-*d*) δ 7.17 (t, *J* = 7.5 Hz, 1H), 7.03 – 6.97 (m, 3H), 3.65 (s, 2H), 2.31 (s, 3H), 2.16 (s, 3H), 1.76 (q, *J* = 7.5 Hz, 6H), 0.68 (t, *J* = 7.5 Hz, 9H). <sup>13</sup>C NMR (101 MHz, Chloroform-*d*) δ 163.41, 148.26, 138.23, 136.79, 128.84, 128.53, 127.44, 126.43, 125.10, 118.41 (q, *J* = 320.0 Hz), 91.42, 35.17, 26.74, 21.31, 17.53, 7.42. <sup>19</sup>F NMR (376 MHz, Chloroform-*d*) δ -74.58. HRMS (ESI) Calculated for C<sub>20</sub>H<sub>27</sub>F<sub>3</sub>O<sub>5</sub>S [M+Na]<sup>+</sup>: 459.1424, found: 459.1418. IR ν (neat, cm<sup>-1</sup>): 3010.2, 1756.1, 1487.5, 1201.7, 1170.5, 998.3, 697.2.

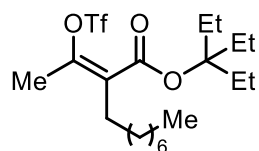

*3-ethylpentan-3-yl (Z)-2-(1-(((trifluoromethyl)sulfonyl)oxy)ethylidene)decanoate (2r)*. Method

A. On 1.0 mmol scale; purified by flash column chromatography on SiO<sub>2</sub> (eluent: petroleum ether/ethyl acetate) to afford **2r**, 160.2 mg, 36%, light yellow oil; R<sub>f</sub> = 0.8 (petroleum ether/ethyl acetate 10:1). <sup>1</sup>H NMR (400 MHz, Chloroform-*d*) δ 2.29 – 2.25 (m, 2H), 2.10 (s, 3H), 1.90 (q, *J* = 7.5 Hz, 6H), 1.52 – 1.45 (m, 2H), 1.35 – 1.26 (m, 10H), 0.90 – 0.83 (m, 12H). <sup>13</sup>C NMR (101 MHz, Chloroform-*d*) δ 164.12, 145.99, 128.17, 118.35 (q, *J* = 320.0 Hz), 91.16,



31.78, 29.90, 29.26, 29.18, 29.13, 28.31, 26.86, 22.63, 16.89, 14.04, 7.67.  $^{19}\text{F}$  NMR (376 MHz, Chloroform-*d*)  $\delta$  -74.62. HRMS (ESI) Calculated for  $\text{C}_{20}\text{H}_{35}\text{F}_3\text{O}_5\text{S}$   $[\text{M}+\text{K}]^+$ : 483.1789, found: 483.1779. IR  $\nu$  (neat,  $\text{cm}^{-1}$ ): 2997.2, 1763.8, 1578.5, 1302.5, 985.2.

### 3. General procedure

#### General procedure A (Standard conditions)

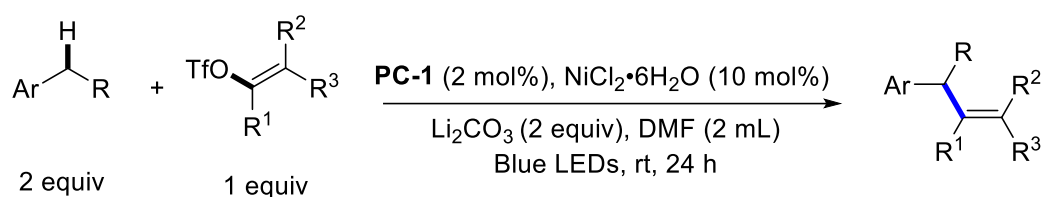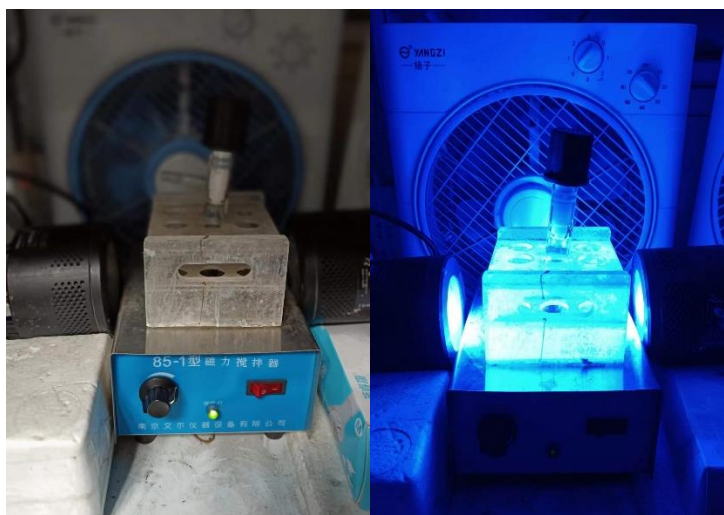

**Supplementary Figure 1.** Reaction device

Photocatalyst  $[\text{Ir}(\text{dF}(\text{CF}_3)\text{ppy})_2(4,4'\text{-dCF}_3\text{bpy})]\text{PF}_6$  (4.6 mg, 2 mol%), benzylic compound (0.4 mmol, 2 equiv), alkenyl triflates (0.2 mmol, 1 equiv),  $\text{NiCl}_2\cdot 6\text{H}_2\text{O}$  (4.8 mg, 10 mol%), and anhydrous powder  $\text{Li}_2\text{CO}_3$  (29.6 mg, 0.4 mmol, 2 equiv) were added to an oven-dried 10 mL Schlenk tube equipped with a magnetic stirring bar. The tube was evacuated and backfilled with argon three times. Subsequently, DMF (2 mL) was added under argon. The tube was then sealed and placed ~5 cm from  $2 \times 45$  W blue LEDs. The reaction mixture was stirred for 24 h at room temperature (air-condition was used to keep the temperature is 25 °C or so). After completion, the reaction mixture was removed from the light, diluted with water and the aqueous layer was extracted with EtOAc ( $3 \times 2$  mL). The combined organic layers were washed with brine, dried over anhydrous  $\text{Na}_2\text{SO}_4$ , filtered, and concentrated. The residue was purified by flash chromatography on silica gel to afford the corresponding products.

#### General procedure B

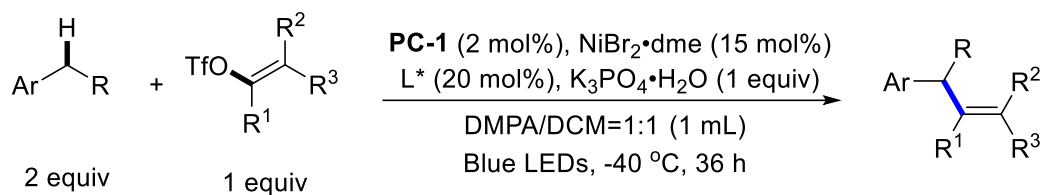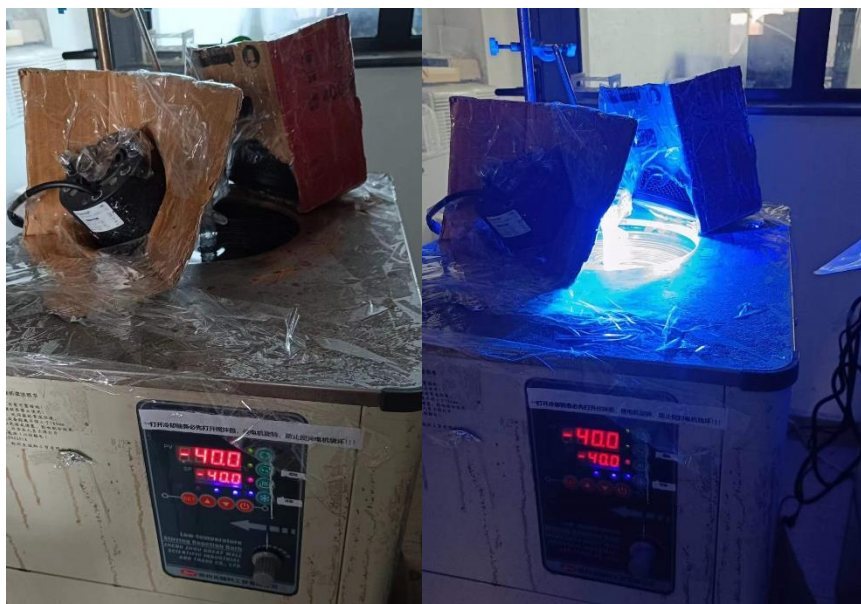

**Supplementary Figure 2.** Reaction device

Preparation of Ni-based catalyst solution: In the nitrogen-filled glove box, a stirring bar, NiBr<sub>2</sub>·dme (4.6 mg, 15 mol%), (3aS,3'aS,8aR,8'aR)-2,2'-cyclopropylidenebis[3a,8a-dihydro-8H-Indeno[1,2-d]oxazole (7.1 mg, 20 mol%) and N,N-Dimethylpropionamide/DCM (1 mL, V/V = 1:1) were successively added to an oven-dried vial (8 mL screw-cap threaded). The vial was then sealed with a Teflon-lined plastic screw-cap and stirred until the resulting mixture become homogeneous (about 20 min). Photocatalyst [Ir(dF(CF<sub>3</sub>)ppy)<sub>2</sub>(4,4'-dCF<sub>3</sub>bpy)]PF<sub>6</sub> (2.3 mg, 2 mol%), and K<sub>3</sub>PO<sub>4</sub>·H<sub>2</sub>O (23.0 mg, 0.1 mmol, 1 equiv) were added to an oven-dried 10 mL Schlenk tube equipped with a magnetic stirring bar. The tube was evacuated and backfilled with argon three times. Subsequently, the nickel-catalyst solution was transferred into this Schlenk tube under argon. Then benzylic compound (0.2 mmol, 2 equiv), alkenyl triflates (0.1 mmol, 1 equiv) were added. The tube was then sealed and placed ~5 cm from 2 × 45 W blue LEDs. The reaction mixture was stirred for 36 h at -40 °C. After completion, the reaction mixture was removed from the light, diluted with water and the aqueous layer was extracted with DCM (3 × 2 mL). The combined organic layers were washed with brine, dried over anhydrous Na<sub>2</sub>SO<sub>4</sub>, filtered, and concentrated. The residue was purified by flash chromatography on silica gel to afford the corresponding ketone products.

### Gram-scale reaction

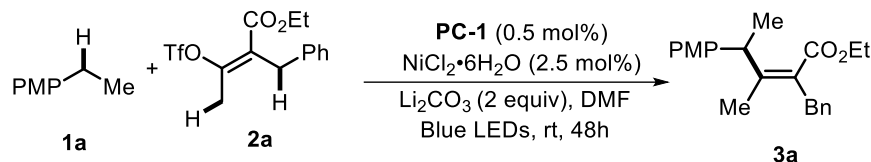

Photocatalyst [Ir(dF(CF<sub>3</sub>)ppy)<sub>2</sub>(4,4'-dCF<sub>3</sub>bpy)]PF<sub>6</sub> (17.2 mg, 0.5 mol%), benzylic compound (6 mmol, 2 equiv), alkenyl triflates (3 mmol, 1 equiv), NiCl<sub>2</sub>·6H<sub>2</sub>O (17.9 mg, 2.5 mol%), and anhydrous powder Li<sub>2</sub>CO<sub>3</sub> (444 mg, 6 mmol, 2 equiv) were added to an oven-dried 100 mL Schlenk tube equipped with a magnetic stirring bar. The tube was evacuated and backfilled with argon three times. Subsequently, DMF (30 mL) was added under argon. The tube was then sealed and placed ~5 cm from 2 × 45 W blue LEDs. The reaction mixture was stirred for 48 h at room temperature (air-condition was used to keep the temperature is 25 °C or so). After completion, the reaction mixture was removed from the light, diluted with water and the aqueous layer was extracted with EtOAc (3 × 20 mL). The combined organic layers were washed with brine, dried over anhydrous Na<sub>2</sub>SO<sub>4</sub>, filtered, and concentrated. The residue was purified by flash chromatography on silica gel to afford the corresponding products in 79% yield (0.8011g).

## 4. Characterization of products

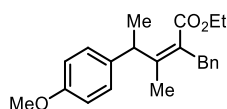

*ethyl (Z)-2-benzyl-4-(4-methoxyphenyl)-3-methylpent-2-enoate (3a)*. The reaction was carried out according to the general procedure A on 0.2 mmol scale (24 h); purified by flash column chromatography on SiO<sub>2</sub> (eluent: petroleum ether/ethyl acetate) to afford **3a**, 57.5 mg, 85%, light yellow oil; R<sub>f</sub> = 0.8 (petroleum ether/ethyl acetate 10:1). <sup>1</sup>H NMR (400 MHz, Chloroform-*d*) δ 7.28 – 7.14 (m, 7H), 6.87 – 6.83 (m, 2H), 4.51 (q, *J* = 7.0 Hz, 1H), 4.13 (q, *J* = 7.1 Hz, 2H), 3.78 (s, 3H), δ 3.69 (d, *J* = 6.6 Hz, 1H), 1.51 (s, 3H), 1.43 (d, *J* = 7.0 Hz, 3H), 1.17 (t, *J* = 7.1 Hz, 3H). <sup>13</sup>C NMR (101 MHz, Chloroform-*d*) δ 169.8, 157.9, 148.3, 139.4, 135.3, 128.4(2C), 128.3(2C), 128.1(2C), 127.1, 125.9, 113.5(2C), 60.3, 55.2, 40.9, 35.9, 16.9, 14.3, 14.1. HRMS (ESI) Calculated for C<sub>22</sub>H<sub>26</sub>O<sub>3</sub> [M+H]<sup>+</sup>: 339.1955, found: 339.1947. IR ν (neat, cm<sup>-1</sup>): 2970, 1708, 1610, 1510, 1454, 1247, 1178, 1077, 1033, 833, 699.

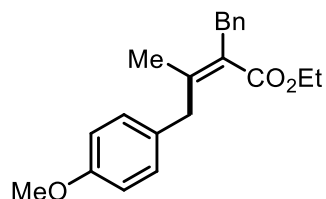

*ethyl (Z)-2-benzyl-4-(4-methoxyphenyl)-3-methylbut-2-enoate (3b)*. The reaction was carried out according to the general procedure A on 0.2 mmol scale (24 h); purified by flash column chromatography on SiO<sub>2</sub> (eluent: petroleum ether/ethyl acetate) to afford **3b**, 48.0 mg, 74%,

light yellow oil; R<sub>f</sub> = 0.8 (petroleum ether/ethyl acetate 10:1). <sup>1</sup>H NMR (400 MHz, Chloroform-*d*) δ 7.28 – 7.14 (m, 7H), 6.83 (d, *J* = 8.6 Hz, 2H), 4.12 (q, *J* = 7.1 Hz, 2H), 3.78 (s, 3H), 3.74 (s, 2H), 3.68 (s, 2H), 1.74 (s, 3H), 1.16 (t, *J* = 7.1 Hz, 3H). <sup>13</sup>C NMR (101 MHz, Chloroform-*d*) δ 169.3, 158.0, 144.8, 139.5, 131.4, 129.9(2C), 128.3(2C), 128.2(2C), 128.1, 125.9, 113.7(2C), 60.3, 55.2, 41.0, 35.8, 19.3, 14.1. HRMS (ESI) Calculated for C<sub>21</sub>H<sub>24</sub>O<sub>3</sub> [M+H]<sup>+</sup>: 325.1798, found: 325.1790. IR ν (neat, cm<sup>-1</sup>): 2916, 1705, 1509, 1246, 1174, 1096, 1034, 698, 670.

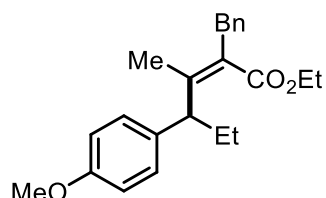

*ethyl (Z)-2-benzyl-4-(4-methoxyphenyl)-3-methylhex-2-enoate (3c)*. The reaction was carried out according to the general procedure A on 0.2 mmol scale (24 h); purified by flash column chromatography on SiO<sub>2</sub> (eluent: petroleum ether/ethyl acetate) to afford **3c**, 42.2 mg, 60%, light yellow oil; R<sub>f</sub> = 0.8 (petroleum ether/ethyl acetate 10:1). <sup>1</sup>H NMR (400 MHz, Chloroform-*d*) δ 7.28 – 7.14 (m, 7H), 6.87 – 6.83 (m, 2H), 4.26 (dd, *J* = 9.2, 6.2 Hz, 1H), 4.15 (q, *J* = 6.8 Hz, 2H), 3.79 (s, 3H), 3.69 (d, *J* = 5.3 Hz, 2H), 1.94 – 1.74 (m, 2H), 1.50 (s, 3H), 1.19 (t, *J* = 7.1 Hz, 3H), 0.94 (t, *J* = 7.3 Hz, 3H). <sup>13</sup>C NMR (101 MHz, Chloroform-*d*) δ 170.0, 157.9, 146.3, 139.4, 134.7, 128.9(2C), 128.3, 128.3(2C), 128.2(2C), 125.9, 113.5(2C), 60.2, 55.2, 48.3, 36.1, 23.7, 14.2, 13.8, 12.2. HRMS (ESI) Calculated for C<sub>23</sub>H<sub>28</sub>O<sub>3</sub> [M+H]<sup>+</sup>: 353.2111, found: 353.2105. IR ν (neat, cm<sup>-1</sup>): 2961, 2932, 1709, 1510, 1494, 1246, 1178, 1086, 1033, 815, 699.

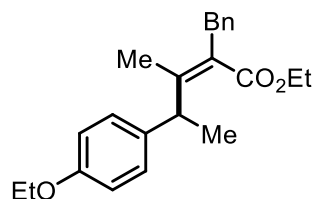

*ethyl (Z)-2-benzyl-4-(4-ethoxyphenyl)-3-methylpent-2-enoate (3d)*. The reaction was carried out according to the general procedure A on 0.2 mmol scale (24 h); purified by flash column chromatography on SiO<sub>2</sub> (eluent: petroleum ether/ethyl acetate) to afford **3d**, 59.1 mg, 84%, light yellow oil; R<sub>f</sub> = 0.8 (petroleum ether/ethyl acetate 10:1). <sup>1</sup>H NMR (400 MHz, Chloroform-*d*) δ 7.27 – 7.14 (m, 7H), 6.84 (d, *J* = 8.7 Hz, 2H), 4.50 (q, *J* = 7.0 Hz, 1H), 4.13 (q, *J* = 7.1 Hz, 2H), 4.01 (q, *J* = 7.0 Hz, 2H), 3.69 (d, *J* = 6.6 Hz, 2H), 1.50 (s, 3H), 1.43 – 1.38 (m, 6H), 1.17 (t, *J* = 7.1 Hz, 3H). <sup>13</sup>C NMR (101 MHz, Chloroform-*d*) δ 169.8, 157.3, 148.3, 139.4, 135.2, 128.4(2C), 128.3(2C), 128.1(2C), 127.0, 125.9, 114.1(2C), 63.3, 60.2, 40.9, 35.9, 16.9, 14.8, 14.3, 14.1. HRMS (ESI) Calculated for C<sub>23</sub>H<sub>28</sub>O<sub>3</sub> [M+H]<sup>+</sup>: 353.2111, found: 353.2104. IR ν (neat, cm<sup>-1</sup>): 2977, 2930, 1708, 1509, 1243, 1177, 1077, 1046, 807, 697.

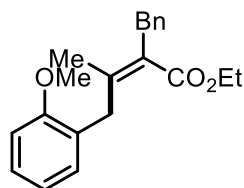

*ethyl (Z)-2-benzyl-4-(2-methoxyphenyl)-3-methylbut-2-enoate (3e)*. The reaction was carried

out according to the general procedure A on 0.2 mmol scale (24 h); purified by flash column chromatography on SiO<sub>2</sub> (eluent: petroleum ether/ethyl acetate) to afford **3e**, 36.9 mg, 57%, light yellow oil; R<sub>f</sub> = 0.8 (petroleum ether/ethyl acetate 10:1). <sup>1</sup>H NMR (400 MHz, Chloroform-*d*) δ 7.28 – 7.15 (m, 7H), 6.91 – 6.83 (m, 2H), 4.11 (q, *J* = 7.1 Hz, 2H), 3.81 (s, 2H), 3.80 (s, 3H), 3.75 (s, 2H), 1.74 (s, 3H), 1.14 (t, *J* = 7.1 Hz, 3H). <sup>13</sup>C NMR (101 MHz, Chloroform-*d*) δ 169.3, 157.6, 145.0, 139.8, 129.9, 128.3, 128.3(2C), 128.2(2C), 127.8, 127.2, 125.9, 120.4, 110.2, 60.1, 55.2, 35.9, 35.2, 19.5, 14.1. HRMS (ESI) Calculated for C<sub>21</sub>H<sub>24</sub>O<sub>3</sub> [M+H]<sup>+</sup>: 325.1798, found: 325.1790. IR ν (neat, cm<sup>-1</sup>): 2931, 1709, 1600, 1455, 1242, 1183, 1114, 1076, 1030, 752, 698.

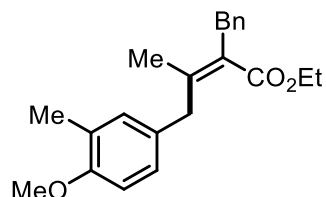

*ethyl (Z)-2-benzyl-4-(4-methoxy-3-methylphenyl)-3-methylbut-2-enoate (3f)*. The reaction was carried out according to the general procedure A on 0.2 mmol scale (24 h); purified by flash column chromatography on SiO<sub>2</sub> (eluent: petroleum ether/ethyl acetate) to afford **3f**, 55.4mg, 82%, light yellow oil; R<sub>f</sub> = 0.8 (petroleum ether/ethyl acetate 10:1). <sup>1</sup>H NMR (400 MHz, Chloroform-*d*) δ 7.28 – 7.15 (m, 5H), 7.04 (d, *J* = 7.5 Hz, 2H), 6.74 (d, *J* = 8.1 Hz, 1H), 4.12 (q, *J* = 7.1 Hz, 2H), 3.79 (s, 3H), 3.74 (s, 2H), 3.65 (s, 2H), 2.20 (s, 3H), 1.16 (t, *J* = 7.1 Hz, 3H). <sup>13</sup>C NMR (101 MHz, Chloroform-*d*) δ 169.3, 156.2, 145.0, 139.6, 131.3, 131.0, 128.3(2C), 128.2(2C), 128.0, 127.0, 126.3, 125.9, 109.8, 60.2, 55.3, 41.0, 35.8, 19.4, 16.2, 14.1. HRMS (ESI) Calculated for C<sub>22</sub>H<sub>26</sub>O<sub>3</sub> [M+H]<sup>+</sup>: 339.1955, found: 339.1947. IR ν (neat, cm<sup>-1</sup>): 2934, 1708, 1608, 1498, 1453, 1289, 1255, 1197, 1181, 1050, 863, 699.

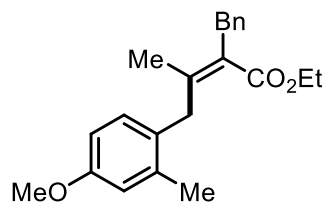

*ethyl (Z)-2-benzyl-4-(4-methoxy-2-methylphenyl)-3-methylbut-2-enoate (3g)*. The reaction was carried out according to the general procedure A on 0.2 mmol scale (24 h); purified by flash column chromatography on SiO<sub>2</sub> (eluent: petroleum ether/ethyl acetate) to afford **3g**, 60.2 mg, 89%, light yellow oil; R<sub>f</sub> = 0.8 (petroleum ether/ethyl acetate 10:1). <sup>1</sup>H NMR (400 MHz, Chloroform-*d*) δ 7.36 – 7.15 (m, 5H), 7.05 (d, *J* = 8.1 Hz, 1H), 6.70 (m, 6.70 – 6.67, 2H), 4.10 (q, *J* = 7.1 Hz, 2H), 3.76 (s, 5H), 3.72 (s, 2H), 2.25 (s, 3H), 1.71 (s, 3H), 1.13 (t, *J* = 7.1 Hz, 3H). <sup>13</sup>C NMR (101 MHz, Chloroform-*d*) δ 169.2, 157.8, 145.0, 139.7, 137.8, 129.9, 129.7, 128.6, 128.3, 128.2, 125.9, 115.7, 111.0, 60.2, 55.1, 38.1, 35.8, 19.9, 19.5, 14.1. HRMS (ESI) Calculated for C<sub>22</sub>H<sub>26</sub>O<sub>3</sub> [M+H]<sup>+</sup>: 339.1944, found: 339.1947. IR ν (neat, cm<sup>-1</sup>): 2978, 2936, 1710, 1608, 1499, 1453, 1289, 1198, 1051, 699.

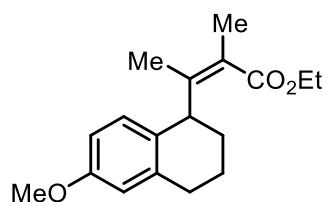

*ethyl (Z)-3-(6-methoxy-1,2,3,4-tetrahydronaphthalen-1-yl)-2-methylbut-2-enoate (3h)*. The reaction was carried out according to the general procedure A on 0.2 mmol scale (24 h); purified by flash column chromatography on SiO<sub>2</sub> (eluent: petroleum ether/ethyl acetate) to afford **3h**, 41.5 mg, 72%, light yellow oil; R<sub>f</sub> = 0.9 (petroleum ether/ethyl acetate 10:1). <sup>1</sup>H NMR (400 MHz, Chloroform-*d*) δ 6.91 (d, *J* = 8.6 Hz, 1H), 6.66 (dd, *J* = 8.4, 2.9 Hz, 1H), 6.60 (d, *J* = 2.8 Hz, 1H), 4.30 (dd, *J* = 10.4, 5.6 Hz, 1H), 4.21 – 4.13 (m, 2H), 3.76 (s, 3H), 2.78 – 2.72 (m, 2H), 1.92 (d, *J* = 1.0 Hz, 5H), 1.73 – 1.58 (m, 2H), 1.48 (q, *J* = 1.1 Hz, 3H), 1.28 (t, *J* = 7.1 Hz, 3H). <sup>13</sup>C NMR (101 MHz, Chloroform-*d*) δ 170.4, 157.4, 146.0, 138.8, 130.0, 129.6, 125.3, 113.4, 112.1, 60.2, 55.1, 43.7, 30.4, 28.7, 22.7, 16.0, 16.0, 14.2. HRMS (ESI) Calculated for C<sub>18</sub>H<sub>24</sub>O<sub>3</sub> [M+H]<sup>+</sup>: 289.1798, found: 289.1788. IR ν (neat, cm<sup>-1</sup>): 2932, 1710, 1609, 1500, 1278, 1258, 1217, 1092, 1040.

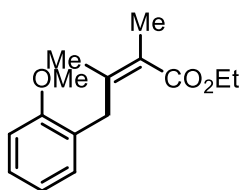

*ethyl (Z)-4-(2-methoxyphenyl)-2,3-dimethylpent-2-enoate (3i)*. The reaction was carried out according to the general procedure A on 0.2 mmol scale (24 h); purified by flash column chromatography on SiO<sub>2</sub> (eluent: petroleum ether/ethyl acetate) to afford **3i**, 22.0 mg, 42%, light yellow oil; R<sub>f</sub> = 0.8 (petroleum ether/ethyl acetate 10:1). <sup>1</sup>H NMR (400 MHz, Chloroform-*d*) δ 7.25 (dd, *J* = 7.0, 1.2 Hz, 1H), 7.18 (td, *J* = 7.8, 1.7 Hz, 1H), 6.93 (td, *J* = 7.5, 1.2 Hz, 1H), 6.78 (dd, *J* = 8.2, 1.2 Hz, 1H), 4.79 (q, *J* = 7.2 Hz, 1H), 4.33 – 4.18 (m, 2H), 3.70 (s, 3H), 1.83 (s, 3H), 1.45 (s, 3H), 1.39 (d, *J* = 7.2 Hz, 3H), 1.33 (t, *J* = 7.2 Hz, 3H). <sup>13</sup>C NMR (101 MHz, Chloroform-*d*) δ 170.4, 157.7, 145.5, 132.3, 127.5, 127.1, 123.1, 120.0, 110.2, 59.9, 55.2, 36.1, 17.0, 16.3, 14.7, 14.3. HRMS (ESI) Calculated for C<sub>16</sub>H<sub>22</sub>O<sub>3</sub> [M+H]<sup>+</sup>: 263.1642, found: 263.1633. IR ν (neat, cm<sup>-1</sup>): 2924, 1712, 1632, 1440, 1275, 1244, 1207, 1106, 1029, 753.

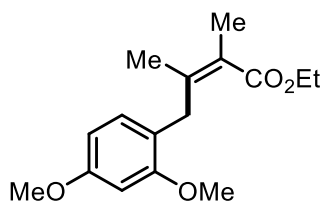

*ethyl (Z)-4-(2,4-dimethoxyphenyl)-2,3-dimethylbut-2-enoate (3j)*. The reaction was carried out according to the general procedure A on 0.2 mmol scale (24 h); purified by flash column chromatography on SiO<sub>2</sub> (eluent: petroleum ether/ethyl acetate) to afford **3j**, 44.5 mg, 80%, light yellow oil; R<sub>f</sub> = 0.8 (petroleum ether/ethyl acetate 10:1). <sup>1</sup>H NMR (400 MHz, Chloroform-*d*) δ 7.03 (dd, *J* = 7.8, 0.9 Hz, 1H), 6.44 – 6.40 (m, 2H), 4.19 (q, *J* = 7.2 Hz, 2H), 3.78 (m, 6H), 3.65 (s, 2H), 1.91 (s, 3H), 1.66 (s, 3H), 1.27 (t, *J* = 7.1 Hz, 3H). <sup>13</sup>C NMR (101 MHz, Chloroform-*d*) δ 170.1, 159.2, 158.4, 143.6, 130.0, 124.2, 120.3, 60.1, 55.3, 55.3, 34.2, 19.3, 16.0, 14.2. HRMS (ESI) Calculated for C<sub>16</sub>H<sub>22</sub>O<sub>4</sub> [M+H]<sup>+</sup>: 279.1591, found: 279.1582. IR ν (neat, cm<sup>-1</sup>): 2935, 1709, 1612, 1505, 1463, 1289, 1208, 1156, 1038, 833.

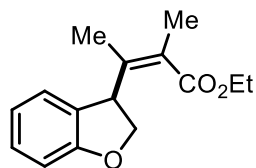

*ethyl (Z)-3-(2,3-dihydrobenzofuran-3-yl)-2-methylbut-2-enoate (3k)*. The reaction was carried out according to the general procedure A on 0.2 mmol scale (24 h); purified by flash column chromatography on SiO<sub>2</sub> (eluent: petroleum ether/ethyl acetate) to afford **3k**, 43.8 mg, 89%, light yellow oil; R<sub>f</sub> = 0.9 (petroleum ether/ethyl acetate 10:1). <sup>1</sup>H NMR (400 MHz, Chloroform-*d*) δ 7.17 – 7.08 (m, 2H), 6.94 – 6.74 (m, 2H), 5.04 (dd, *J* = 9.9, 6.5 Hz, 1H), 4.73 – 4.64 (m, 1H), 4.32 (dd, *J* = 9.2, 6.4 Hz, 1H), 4.23 (q, *J* = 7.1 Hz, 2H), 1.92 (s, 3H), 1.60 (s, 3H), 1.33 (t, *J* = 7.2 Hz, 3H). <sup>13</sup>C NMR (101 MHz, Chloroform-*d*) δ 169.6, 160.4, 128.8, 128.4, 125.8, 125.1, 120.5, 109.5, 75.1, 60.5, 46.5, 16.1, 15.2, 14.2. HRMS (ESI) Calculated for C<sub>15</sub>H<sub>18</sub>O<sub>3</sub> [M+H]<sup>+</sup>: 247.1329, found: 247.1321. IR ν (neat, cm<sup>-1</sup>): 2980, 1706, 1596, 1482, 1277, 1231, 1094, 973, 750.

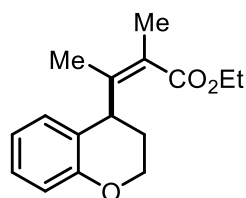

*ethyl (Z)-3-(chroman-4-yl)-2-methylbut-2-enoate (3l)*. The reaction was carried out according to the general procedure A on 0.2 mmol scale (24 h); purified by flash column chromatography on SiO<sub>2</sub> (eluent: petroleum ether/ethyl acetate) to afford **3l**, 46.8 mg, 90%, light yellow oil; R<sub>f</sub> = 0.8 (petroleum ether/ethyl acetate 10:1). <sup>1</sup>H NMR (400 MHz, Chloroform-*d*) δ 7.10 – 7.06 (m, 1H), 6.94 – 6.92 (m, 1H), 6.84 – 6.79 (m, 2H), 4.57 – 4.53 (m, 1H), 4.34 (dt, *J* = 10.9, 3.1 Hz, 1H), 4.25 – 4.14 (m, 2H), 4.06 (td, *J* = 11.8, 2.1 Hz, 1H), 2.10 – 1.99 (m, 2H), 1.94 (s, 3H), 1.51 (s, 3H), 1.29 (t, *J* = 7.1 Hz, 3H). <sup>13</sup>C NMR (101 MHz, Chloroform-*d*) δ 170.0, 155.5, 144.4, 129.1, 127.5, 126.7, 123.8, 120.5, 116.8, 65.7, 60.4, 39.9, 27.4, 16.1, 15.8, 14.2. HRMS (ESI) Calculated for C<sub>16</sub>H<sub>20</sub>O<sub>3</sub> [M+H]<sup>+</sup>: 261.1485, found: 261.1475. IR ν (neat, cm<sup>-1</sup>): 2977, 2929, 1708, 1581, 1487, 1452, 1273, 1255, 1118, 1062, 1014, 756.

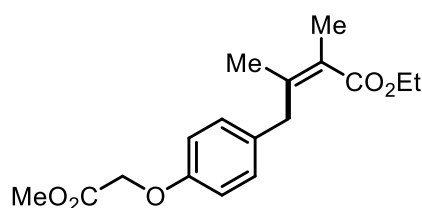

*ethyl (Z)-4-(4-(2-methoxy-2-oxoethoxy)phenyl)-2,3-dimethylbut-2-enoate (3m)*. The reaction was carried out according to the general procedure A on 0.2 mmol scale (24 h); purified by flash column chromatography on SiO<sub>2</sub> (eluent: petroleum ether/ethyl acetate) to afford **3m**, 50.8 mg, 83%, light yellow oil; R<sub>f</sub> = 0.5 (petroleum ether/ethyl acetate 10:1). <sup>1</sup>H NMR (400 MHz, Chloroform-*d*) δ 7.16 (d, *J* = 8.8 Hz, 2H), 6.82 (d, *J* = 8.8 Hz, 2H), 4.61 (s, 2H), 4.21 (q, *J* = 7.2 Hz, 2H), 3.80 (s, 3H), 3.62 (s, 2H), 1.91 (s, 3H), 1.66 (s, 3H), 1.29 (t, *J* = 7.2 Hz, 3H). <sup>13</sup>C NMR (101 MHz, Chloroform-*d*) δ 169.9, 169.5, 156.2, 143.1, 132.8, 129.9, 124.3, 114.5, 65.4, 60.2, 52.2, 40.7, 19.3, 15.9, 14.2. HRMS (ESI) Calculated for C<sub>17</sub>H<sub>22</sub>O<sub>5</sub> [M+H]<sup>+</sup>: 307.1540,

found: 307.1531. IR  $\nu$  (neat,  $\text{cm}^{-1}$ ): 2920, 1762, 1706, 1509, 1438, 1273, 1203, 1173, 1102,

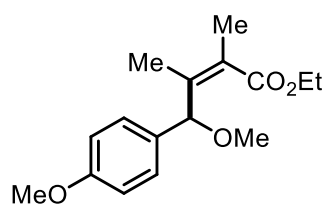

*ethyl (Z)-4-methoxy-4-(4-methoxyphenyl)-2,3-dimethylbut-2-enoate (3n)*. The reaction was carried out according to the general procedure A on 0.2 mmol scale (24 h); purified by flash column chromatography on  $\text{SiO}_2$  (eluent: petroleum ether/ethyl acetate) to afford **3n**, 36.1 mg, 65%, light yellow oil;  $R_f = 0.8$  (petroleum ether/ethyl acetate 10:1).  $^1\text{H}$  NMR (400 MHz, Chloroform-*d*)  $\delta$  7.34 (d,  $J = 8.9$  Hz, 2H), 6.85 (d,  $J = 8.8$  Hz, 2H), 5.51 (s, 1H), 4.26 (q,  $J = 7.2$  Hz, 2H), 3.79 (s, 3H), 3.32 (s, 3H), 1.92 (d,  $J = 1.1$  Hz, 3H), 1.57 (d,  $J = 1.1$  Hz, 3H), 1.33 (t,  $J = 7.2$  Hz, 3H).  $^{13}\text{C}$  NMR (101 MHz, Chloroform-*d*)  $\delta$  169.8, 158.6, 142.5, 132.6, 127.2, 127.0, 113.4, 80.9, 60.5, 56.3, 55.2, 16.1, 14.3, 12.6. HRMS (ESI) Calculated for  $\text{C}_{16}\text{H}_{22}\text{O}_4$   $[\text{M}+\text{H}]^+$ : 279.1591, found: 279.1582. IR  $\nu$  (neat,  $\text{cm}^{-1}$ ): 2931, 1710, 1612, 1510, 1463, 1301, 1246, 1213, 1093, 1035, 836.

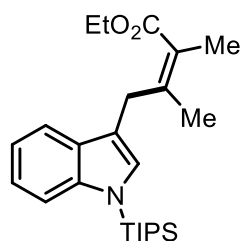

*ethyl (Z)-2,3-dimethyl-4-(1-(triisopropylsilyl)-1H-indol-3-yl)but-2-enoate (3o)*. The reaction was carried out according to the general procedure A on 0.2 mmol scale (24 h); purified by flash column chromatography on  $\text{SiO}_2$  (eluent: petroleum ether/ethyl acetate) to afford **3o**, 34.8 mg, 42%, light yellow oil;  $R_f = 0.9$  (petroleum ether/ethyl acetate 10:1).  $^1\text{H}$  NMR (400 MHz, Chloroform-*d*)  $\delta$  7.62 – 7.60 (m, 1H), 7.47 – 7.44 (m, 1H), 7.14 – 7.06 (m, 2H), 7.02 (s, 1H), 4.25 (q,  $J = 7.2$  Hz, 2H), 3.82 (s, 2H), 1.92 (d,  $J = 1.0$  Hz, 3H), 1.72 – 1.64 (m, 6H), 1.30 (t,  $J = 7.1$  Hz, 3H), 1.13 (d,  $J = 7.6$  Hz, 18H).  $^{13}\text{C}$  NMR (101 MHz, Chloroform-*d*)  $\delta$  170.4, 143.4, 141.3, 131.2, 129.5, 123.5, 121.2, 119.3, 119.0, 115.6, 113.8, 60.2, 31.5, 19.2, 18.1, 16.1, 14.3, 12.8. HRMS (ESI) Calculated for  $\text{C}_{25}\text{H}_{39}\text{NO}_2\text{Si}$   $[\text{M}+\text{H}]^+$ : 414.2823, found: 414.2812. IR  $\nu$  (neat,  $\text{cm}^{-1}$ ): 2947, 2868, 1711, 1450, 1173, 1140, 1088, 740.

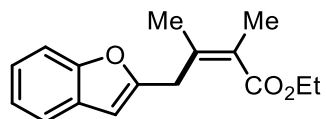

*ethyl (Z)-4-(benzofuran-2-yl)-2,3-dimethylbut-2-enoate (3p)*. The reaction was carried out according to the general procedure A on 0.2 mmol scale (24 h); purified by flash column chromatography on  $\text{SiO}_2$  (eluent: petroleum ether/ethyl acetate) to afford **3p**, 23.7 mg, 46%, light yellow oil;  $R_f = 0.9$  (petroleum ether/ethyl acetate 10:1).  $^1\text{H}$  NMR (400 MHz, Chloroform-*d*)  $\delta$  7.48 – 7.45 (m, 1H), 7.42 – 7.39 (m, 1H), 7.22 – 7.14 (m, 2H), 6.43 (d,  $J = 1.1$  Hz, 1H), 4.22 (q,  $J = 7.2$  Hz, 2H), 3.93 (s, 2H), 1.94 (s, 3H), 1.87 (s, 3H), 1.29 (t,  $J = 7.2$  Hz, 3H).  $^{13}\text{C}$  NMR (101 MHz, Chloroform-*d*)  $\delta$  169.2, 156.8, 154.7, 140.7, 128.9, 125.5, 123.2, 122.4, 120.3,



110.8, 103.1, 60.4, 34.7, 20.2, 16.0, 14.2. HRMS (ESI) Calculated for C<sub>16</sub>H<sub>18</sub>O<sub>3</sub> [M+H]<sup>+</sup>: 259.1329, found: 259.1320. IR  $\nu$  (neat, cm<sup>-1</sup>): 2929, 1709, 1454, 1297, 1271, 1159, 1084, 751.

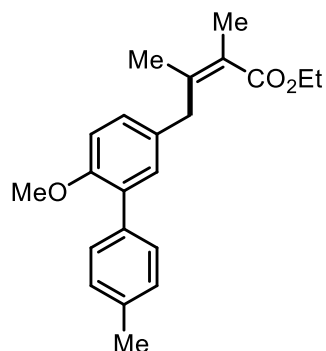

*ethyl (Z)-4-(6-methoxy-4'-methyl-[1,1'-biphenyl]-3-yl)-2,3-dimethylbut-2-enoate (3q)*. The reaction was carried out according to the general procedure A on 0.2 mmol scale (24 h); purified by flash column chromatography on SiO<sub>2</sub> (eluent: petroleum ether/ethyl acetate) to afford **3q**, 48.7 mg, 72%, light yellow oil; R<sub>f</sub> = 0.8 (petroleum ether/ethyl acetate 10:1). <sup>1</sup>H NMR (400 MHz, Chloroform-*d*)  $\delta$  7.42 (d, *J* = 7.9 Hz, 2H), 7.22 – 7.15 (m, 4H), 6.88 (d, *J* = 8.1 Hz, 1H), 4.21 (q, *J* = 7.1 Hz, 1H), 3.76 (s, 3H), 3.67 (s, 2H), 2.38 (s, 3H), 1.90 (s, 3H), 1.70 (s, 3H), 1.29 (t, *J* = 7.1 Hz, 3H). <sup>13</sup>C NMR (101 MHz, Chloroform-*d*)  $\delta$  169.9, 154.9, 143.2, 136.5, 135.7, 131.7, 131.3, 130.3, 129.4(2C), 128.7(2C), 128.6, 124.2, 111.1, 60.2, 55.6, 40.7, 21.1, 19.3, 16.0, 14.3. HRMS (ESI) Calculated for C<sub>22</sub>H<sub>26</sub>O<sub>3</sub> [M+H]<sup>+</sup>: 339.1955, found: 339.1947. IR  $\nu$  (neat, cm<sup>-1</sup>): 2923, 1709, 1518, 1494, 1296, 1239, 1172, 1105, 1044, 821.

11,

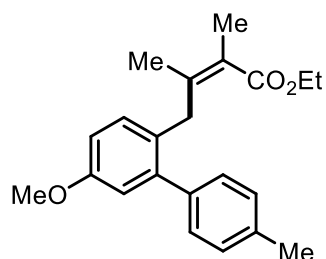

*ethyl (Z)-4-(5-methoxy-4'-methyl-[1,1'-biphenyl]-2-yl)-2,3-dimethylbut-2-enoate (3r)*. The reaction was carried out according to the general procedure A on 0.2 mmol scale (24 h); purified by flash column chromatography on SiO<sub>2</sub> (eluent: petroleum ether/ethyl acetate) to afford **3r**, 49.3 mg, 73%, light yellow oil; R<sub>f</sub> = 0.8 (petroleum ether/ethyl acetate 10:1). <sup>1</sup>H NMR (400 MHz, Chloroform-*d*)  $\delta$  7.12 – 7.07 (m, 5H), 6.75 (dd, *J* = 8.6, 2.8 Hz, 1H), 6.68 (d, *J* = 2.8 Hz, 1H), 4.08 (q, *J* = 7.2 Hz, 2H), 3.70 (s, 3H), 3.56 (s, 2H), 2.30 (s, 3H), 1.77 (d, *J* = 1.0 Hz, 3H), 1.41 (d, *J* = 1.1 Hz, 3H), 1.18 (t, *J* = 7.1 Hz, 3H). <sup>13</sup>C NMR (101 MHz, Chloroform-*d*)  $\delta$  169.7, 157.5, 144.2, 143.3, 138.8, 136.5, 129.9, 129.1, 1289.0, 128.7, 124.4, 115.0, 113.1, 60.1, 55.2, 37.8, 21.1, 19.3, 15.8, 14.2. HRMS (ESI) Calculated for C<sub>22</sub>H<sub>26</sub>O<sub>3</sub> [M+H]<sup>+</sup>: 339.1955, found: 339.1947. IR  $\nu$  (neat, cm<sup>-1</sup>): 2932, 1708, 1606, 1493, 1296, 1271, 1221, 1175, 1103, 1082, 1017, 823.

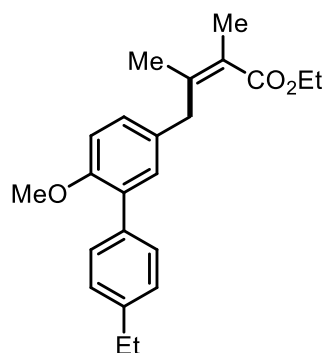

*ethyl (Z)-4-(4'-ethyl-6-methoxy-[1,1'-biphenyl]-3-yl)-2,3-dimethylbut-2-enoate (3s)*. The reaction was carried out according to the general procedure A on 0.2 mmol scale (24 h); purified by flash column chromatography on SiO<sub>2</sub> (eluent: petroleum ether/ethyl acetate) to afford **3s**, 49.3 mg, 70%, light yellow oil; R<sub>f</sub> = 0.8 (petroleum ether/ethyl acetate 10:1). <sup>1</sup>H NMR (400 MHz, Chloroform-*d*) δ 7.45 (d, *J* = 8.1 Hz, 2H), 7.26 – 7.20 (m, 2), 7.21 – 7.12 (m, 2H), 6.88 (d, *J* = 8.2 Hz, 1H), 4.20 (t, *J* = 7.2 Hz, 2H), 3.77 (s, 3H), 3.67 (s, 2H), 2.68 (q, *J* = 7.6 Hz, 2H), 1.90 (s, 3H), 1.69 (s, 3H), 1.28 (q, *J* = 7.1 Hz, 6H). <sup>13</sup>C NMR (101 MHz, Chloroform-*d*) δ 169.9, 154.9, 143.2, 142.7, 135.9, 131.7, 131.4, 130.3, 129.4, 128.6, 127.4, 124.2, 111.1, 60.2, 55.6, 40.8, 28.5, 19.3, 16.0, 15.4, 14.3. HRMS (ESI) Calculated for C<sub>23</sub>H<sub>28</sub>O<sub>3</sub> [M+H]<sup>+</sup>: 353.2111, found: 353.2105. IR ν (neat, cm<sup>-1</sup>): 2963, 2931, 1710, 1517, 1494, 1267, 1241, 1146, 1083, 1028, 834.

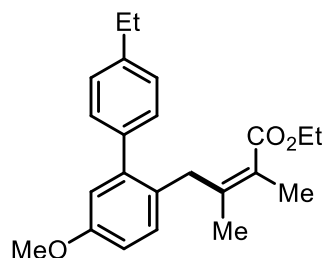

*ethyl (Z)-4-(4'-ethyl-5-methoxy-[1,1'-biphenyl]-2-yl)-2,3-dimethylbut-2-enoate (3t)*. The reaction was carried out according to the general procedure A on 0.2 mmol scale (24 h); purified by flash column chromatography on SiO<sub>2</sub> (eluent: petroleum ether/ethyl acetate) to afford **3t**, 52.1 mg, 74%, light yellow oil; R<sub>f</sub> = 0.8 (petroleum ether/ethyl acetate 10:1). <sup>1</sup>H NMR (400 MHz, Chloroform-*d*) δ 7.21 – 7.16 (m, 5H), δ 6.83 (dd, *J* = 8.6, 2.8 Hz, 1H), 6.77 (d, *J* = 2.8 Hz, 1H), 4.17 (q, *J* = 7.2 Hz, 2H), 3.79 (s, 3H), 3.64 (s, 2H), 2.69 (q, *J* = 7.6 Hz, 2H), 1.85 (s, 3H), 1.49 (s, 3H), 1.30 – 1.24 (m, 6H). <sup>13</sup>C NMR (101 MHz, Chloroform-*d*) δ 169.8, 157.5, 144.2, 143.4, 142.8, 139.0, 129.9, 129.2, 129.0, 127.5, 124.4, 114.9, 113.1, 60.1, 55.2, 37.8, 28.5, 19.4, 15.8, 15.5, 14.2. HRMS (ESI) Calculated for C<sub>23</sub>H<sub>28</sub>O<sub>3</sub> [M+H]<sup>+</sup>: 353.2111, found: 353.2102. IR ν (neat, cm<sup>-1</sup>): 2963, 3933, 1707, 1605, 1492, 1295, 1271, 1174, 1102, 1016, 835.

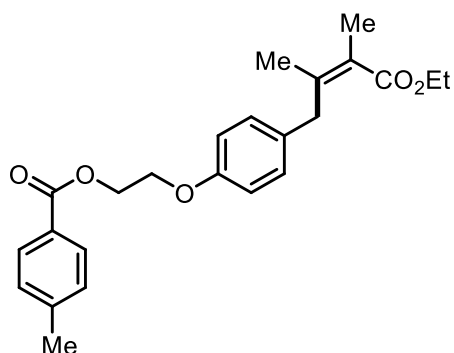

(*Z*)-2-(4-(4-ethoxy-2,3-dimethyl-4-oxobut-2-en-1-yl)phenoxy)ethyl 4-methylbenzoate (**3u**). The reaction was carried out according to the general procedure A on 0.2 mmol scale (24 h); purified by flash column chromatography on SiO<sub>2</sub> (eluent: petroleum ether/ethyl acetate) to afford **3u**, 57.8 mg, 73%, light yellow oil; R<sub>f</sub> = 0.6 (petroleum ether/ethyl acetate 10:1). <sup>1</sup>H NMR (400 MHz, Chloroform-*d*) δ 7.97 (d, *J* = 8.3 Hz, 2H), 7.25 (d, *J* = 7.8 Hz, 2H), 7.19 (d, *J* = 8.7 Hz, 2H), 6.89 (d, *J* = 8.7 Hz, 2H), 4.69 – 4.64 (m, 2H), 4.35 – 4.29 (m, 2H), 4.25 (q, *J* = 7.1 Hz, 2H), 3.66 (s, 2H), 2.42 (s, 3H), 1.94 (s, 3H), 1.69 (s, 3H), 1.32 (t, *J* = 7.1 Hz, 3H). <sup>13</sup>C NMR (101 MHz, Chloroform-*d*) δ 169.9, 166.5, 157.0, 143.7, 143.2, 132.1, 129.9, 129.7, 1289.0, 127.1, 124.1, 114.5, 66.0, 63.2, 60.2, 40.7, 21.6, 19.2, 15.9, 14.2. HRMS (ESI) Calculated for C<sub>24</sub>H<sub>28</sub>O<sub>5</sub> [M+H]<sup>+</sup>: 397.2010, found: 397.2002. IR ν (neat, cm<sup>-1</sup>): 2926, 1713, 1611, 1509, 1272, 1240, 1176, 1103, 777.

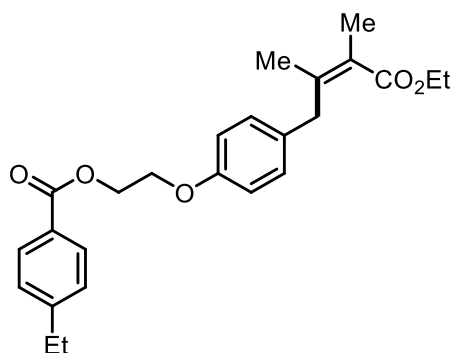

(*Z*)-2-(4-(4-ethoxy-2,3-dimethyl-4-oxobut-2-en-1-yl)phenoxy)ethyl 4-ethylbenzoate (**3v**). The reaction was carried out according to the general procedure A on 0.2 mmol scale (24 h); purified by flash column chromatography on SiO<sub>2</sub> (eluent: petroleum ether/ethyl acetate) to afford **3v**, 67.4 mg, 82%, light yellow oil; R<sub>f</sub> = 0.6 (petroleum ether/ethyl acetate 10:1). <sup>1</sup>H NMR (400 MHz, Chloroform-*d*) δ 7.97 (d, *J* = 8.3 Hz, 2H), 7.25 (d, *J* = 8.4 Hz, 2H), 7.16 (d, *J* = 8.7 Hz, 2H), 6.86 (d, *J* = 8.7 Hz, 2H), 4.63 (t, *J* = 4.9 Hz, 2H), 4.27 (t, *J* = 4.8 Hz, 2H), 4.22 (q, *J* = 7.1 Hz, 2H), 3.63 (s, 2H), 2.69 (q, *J* = 7.6 Hz, 2H), 1.91 (s, 13H), 1.66 (s, 3H), 1.31 – 1.23 (m, 6H). <sup>13</sup>C NMR (101 MHz, Chloroform-*d*) δ 169.9, 166.6, 157.0, 149.9, 143.2, 132.2, 129.9, 129.8, 127.8, 127.4, 124.2, 114.6, 66.1, 63.2, 60.2, 40.7, 28.9, 19.2, 15.9, 15.2, 14.2. HRMS (ESI) Calculated for C<sub>25</sub>H<sub>30</sub>O<sub>5</sub> [M+H]<sup>+</sup>: 411.2166, found: 411.2155. IR ν (neat, cm<sup>-1</sup>): 2967, 1715, 1611, 1510, 1274, 1242, 1177, 1104, 853.

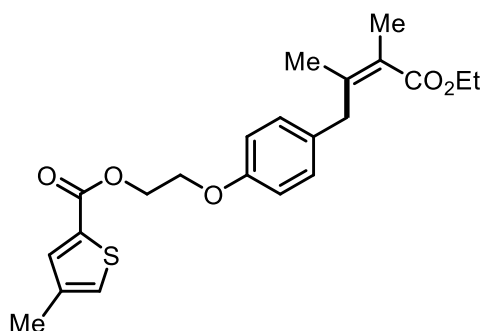

(*Z*)-2-(4-(4-ethoxy-2,3-dimethyl-4-oxobut-2-en-1-yl)phenoxy)ethyl 4-methylthiophene-2-carboxylate (**3w**). The reaction was carried out according to the general procedure A on 0.2 mmol scale (24 h); purified by flash column chromatography on SiO<sub>2</sub> (eluent: petroleum ether/ethyl acetate) to afford **3w**, 52.4 mg, 65%, light yellow oil; R<sub>f</sub> = 0.5 (petroleum ether/ethyl acetate 10:1). <sup>1</sup>H NMR (400 MHz, Chloroform-*d*) δ 7.61 (d, *J* = 1.7 Hz, 1H), 7.17 – 7.13 (m, 3H), 6.88 – 6.84 (m, 2H), 4.60 (dd, *J* = 5.5, 4.3 Hz, 2H), 4.26 – 4.19 (m, 4H), 3.62 (s, 2H), 2.26 (s, 3H), 1.91 (s, 3H), 1.66 (s, 3H), 1.29 (t, *J* = 7.2 Hz, 3H). <sup>13</sup>C NMR (101 MHz, Chloroform-*d*) δ 169.9, 162.1, 156.9, 143.2, 138.4, 135.5, 132.8, 132.2, 129.9, 128.4, 124.1, 114.5, 65.9, 63.3, 60.2, 40.7, 19.2, 15.9, 15.4, 14.2. HRMS (ESI) Calculated for C<sub>22</sub>H<sub>26</sub>O<sub>5</sub>S [M+H]<sup>+</sup>: 403.1574, found: 403.1567. IR ν (neat, cm<sup>-1</sup>): 2926, 1706, 1509, 1429, 1276, 1234, 1175, 1081, 951, 772.

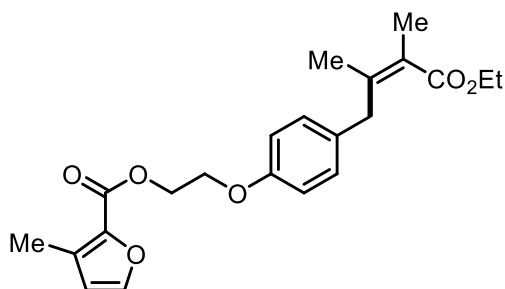

(*Z*)-2-(4-(4-ethoxy-2,3-dimethyl-4-oxobut-2-en-1-yl)phenoxy)ethyl 3-methylfuran-2-carboxylate (**3x**). The reaction was carried out according to the general procedure A on 0.2 mmol scale (24 h); purified by flash column chromatography on SiO<sub>2</sub> (eluent: petroleum ether/ethyl acetate) to afford **3x**, 54.0 mg, 70%, light yellow oil; R<sub>f</sub> = 0.4 (petroleum ether/ethyl acetate 10:1). <sup>1</sup>H NMR (400 MHz, Chloroform-*d*) δ 7.44 (d, *J* = 1.8 Hz, 1H), 7.15 (d, *J* = 8.7 Hz, 2H), 6.85 (d, *J* = 8.8 Hz, 2H), 6.35 (d, *J* = 1.8 Hz, 1H), 4.64 – 4.62 (m, 2H), 4.27 – 4.18 (m, 4H), 3.62 (s, 2H), 2.35 (s, 3H), 1.91 (q, *J* = 1.1 Hz, 3H), 1.66 (q, *J* = 1.1 Hz, 3H), 1.29 (t, *J* = 7.1 Hz, 3H). <sup>13</sup>C NMR (101 MHz, Chloroform-*d*) δ 169.9, 159.3, 156.9, 145.1, 143.2, 132.2, 131.5, 129.9, 129.4, 124.1, 115.1, 114.5, 65.9, 62.7, 60.2, 40.7, 19.2, 15.9, 14.2, 11.5. HRMS (ESI) Calculated for C<sub>22</sub>H<sub>26</sub>O<sub>6</sub> [M+H]<sup>+</sup>: 387.1802, found: 387.1795. IR ν (neat, cm<sup>-1</sup>): 2928, 1705, 1509, 1290, 1242, 1177, 1098, 1073, 929, 776.

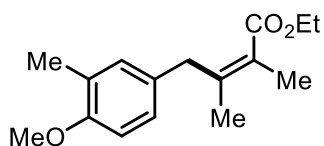

ethyl (*Z*)-4-(4-methoxy-3-methylphenyl)-2,3-dimethylbut-2-enoate (**3y**). The reaction was

carried out according to the general procedure A on 0.2 mmol scale (24 h); purified by flash column chromatography on SiO<sub>2</sub> (eluent: petroleum ether/ethyl acetate) to afford **3y**, 46.6 mg, 89%, light yellow oil; R<sub>f</sub> = 0.9 (petroleum ether/ethyl acetate 10:1). <sup>1</sup>H NMR (400 MHz, Chloroform-*d*) δ 7.05 – 6.97 (m, 2H), 6.72 (d, *J* = 8.8 Hz, 1H), 4.22 (q, *J* = 7.2 Hz, 2H), 3.79 (s, 3H), 3.59 (s, 2H), 2.19 (s, 3H), 1.90 (q, *J* = 1.0 Hz, 3H), 1.66 (q, *J* = 1.0 Hz, 3H), 1.30 (t, *J* = 7.2 Hz, 3H).

<sup>13</sup>C NMR (101 MHz, Chloroform-*d*) δ 170.0, 156.1, 143.4, 131.2, 131.1, 126.9, 126.3, 123.9, 109.7, 60.2, 55.2, 40.7, 19.2, 16.2, 15.9, 14.2. HRMS (ESI) Calculated for C<sub>16</sub>H<sub>22</sub>O<sub>3</sub> [M+H]<sup>+</sup>: 263.1642, found: 263.1632. IR ν (neat, cm<sup>-1</sup>): 2928, 1710, 1504, 1464, 1443, 1273, 1252, 1174, 1105, 1035.

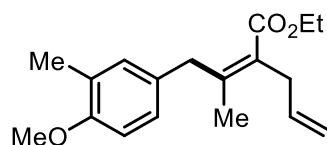

*ethyl (Z)-2-(1-(4-methoxy-3-methylphenyl)propan-2-ylidene)pent-4-enoate (3z)*. The reaction was carried out according to the general procedure A on 0.2 mmol scale (24 h); purified by flash column chromatography on SiO<sub>2</sub> (eluent: petroleum ether/ethyl acetate) to afford **3z**, 49.0 mg, 85%, light yellow oil; R<sub>f</sub> = 0.9 (petroleum ether/ethyl acetate 10:1). <sup>1</sup>H NMR (400 MHz, Chloroform-*d*) δ 7.03 – 7.01 (m, 2H), 6.73 (d, *J* = 8.8 Hz, 1H), 5.87 – 5.77 (m, 1H), 5.09 – 4.99 (m, 2H), 4.22 (q, *J* = 7.1 Hz, 2H), 3.79 (s, 3H), 3.60 (s, 2H), 3.10 (d, *J* = 6.1 Hz, 2H), 2.19 (s, 3H), 1.68 (s, 3H), 1.28 (t, *J* = 7.2 Hz, 3H). <sup>13</sup>C NMR (101 MHz, Chloroform-*d*) δ 169.4, 156.2, 144.7, 135.1, 131.3, 131.0, 127.0, 126.6, 126.3, 115.3, 109.8, 60.2, 55.3, 40.9, 34.3, 18.8, 16.2, 14.2. HRMS (ESI) Calculated for C<sub>18</sub>H<sub>24</sub>O<sub>3</sub> [M+H]<sup>+</sup>: 289.1798, found: 289.1789. IR ν (neat, cm<sup>-1</sup>): 2979, 1710, 1504, 1442, 1274, 1202, 1134, 1036, 913, 807.

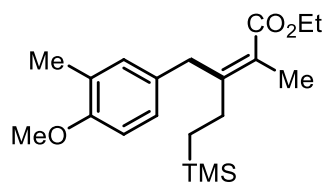

*ethyl (E)-3-(4-methoxy-3-methylbenzyl)-2-methyl-5-(trimethylsilyl)pent-2-enoate (3aa)*. The reaction was carried out according to the general procedure A on 0.2 mmol scale (24 h); purified by flash column chromatography on SiO<sub>2</sub> (eluent: petroleum ether/ethyl acetate) to afford **3aa**, 60.0 mg, 86%, light yellow oil; R<sub>f</sub> = 0.9 (petroleum ether/ethyl acetate 10:1). <sup>1</sup>H NMR (400 MHz, Chloroform-*d*) δ 7.02 – 6.99 (m, 2H), 6.73 (d, *J* = 8.9 Hz, 1H), 4.22 (q, *J* = 7.2 Hz, 2H), 3.80 (s, 3H), 3.62 (s, 2H), 2.20 (s, 3H), 1.99 – 1.95 (m, 2H), 1.91 (s, 3H), 1.30 (t, *J* = 7.2 Hz, 3H), 0.59 – 0.55 (m, 2H), -0.02 (s, 9H). <sup>13</sup>C NMR (101 MHz, Chloroform-*d*) δ 170.3, 156.1, 150.2, 131.4, 127.1, 126.2, 122.6, 109.8, 60.2, 55.3, 37.8, 26.2, 16.2, 15.3, 14.8, 14.3, -2.0. HRMS (ESI) Calculated for C<sub>20</sub>H<sub>32</sub>O<sub>3</sub>Si [M+H]<sup>+</sup>: 349.2193, found: 349.2178. IR ν (neat, cm<sup>-1</sup>): 2952, 1711, 1504, 1250, 1175, 1092, 1036, 861, 836.

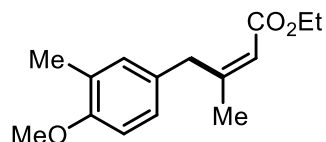

*ethyl (Z)-4-(4-methoxy-3-methylphenyl)-3-methylbut-2-enoate (3bb)*. The reaction was carried out according to the general procedure A on 0.2 mmol scale (24 h); purified by flash column chromatography on SiO<sub>2</sub> (eluent: petroleum ether/ethyl acetate) to afford **3bb**, 36.2 mg, 73%, light yellow oil; R<sub>f</sub> = 0.9 (petroleum ether/ethyl acetate 10:1). <sup>1</sup>H NMR (400 MHz, Chloroform-*d*) δ 7.03 – 7.00 (m, 2H), 6.72 (d, *J* = 8.1 Hz, 1H), 5.74 (s, 1H), 4.19 (q, *J* = 7.1 Hz, 2H), 3.92 (s, 2H), 3.79 (s, 3H), 2.18 (s, 3H), 1.78 (s, 3H), 1.29 (t, *J* = 7.2 Hz, 3H). <sup>13</sup>C NMR (101 MHz, Chloroform-*d*) δ 166.5, 158.2, 156.3, 131.2, 130.5, 127.0, 126.4, 116.6, 109.8, 59.6, 55.2, 37.9, 24.5, 16.1, 14.3. HRMS (ESI) Calculated for C<sub>15</sub>H<sub>20</sub>O<sub>3</sub> [M+H]<sup>+</sup>: 249.1485, found: 249.1475. IR ν (neat, cm<sup>-1</sup>): 2979, 1712, 1649, 1504, 1464, 1253, 1170, 1137, 1053, 1036, 807.

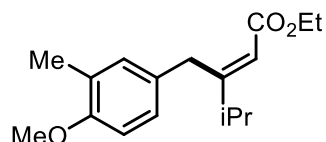

*ethyl (E)-3-(4-methoxy-3-methylbenzyl)-4-methylpent-2-enoate (3cc)*. The reaction was carried out according to the general procedure A on 0.2 mmol scale (24 h); purified by flash column chromatography on SiO<sub>2</sub> (eluent: petroleum ether/ethyl acetate) to afford **3cc**, 43.6 mg, 79%, light yellow oil; R<sub>f</sub> = 0.9 (petroleum ether/ethyl acetate 10:1). <sup>1</sup>H NMR (400 MHz, Chloroform-*d*) δ 7.00 - 6.97 (m, 2H), 6.71 (d, *J* = 8.2 Hz, 1H), 5.79 (s, 1H), 4.18 (q, *J* = 7.2 Hz, 2H), 3.98 (s, 2H), 3.79 (s, 3H), 2.36 – 2.30 (m, 1H), 2.18 (s, 3H), 1.29 (t, *J* = 7.1 Hz, 3H), 1.01 (d, *J* = 6.8 Hz, 6H). <sup>13</sup>C NMR (101 MHz, Chloroform-*d*) δ 167.6, 167.2, 156.1, 131.2, 130.6, 126.8, 126.3, 114.1, 109.8, 59.7, 55.3, 35.9, 34.1, 21.8, 16.2, 14.3. HRMS (ESI) Calculated for C<sub>17</sub>H<sub>24</sub>O<sub>3</sub> [M+H]<sup>+</sup>: 277.1798, found: 277.1790. IR ν (neat, cm<sup>-1</sup>): 2963, 1713, 1641, 1504, 1253, 1164, 1134, 1035.

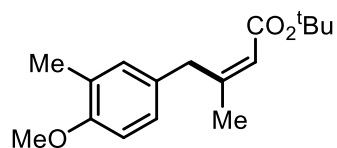

*tert-butyl (Z)-4-(4-methoxy-3-methylphenyl)-3-methylbut-2-enoate (3dd)*. The reaction was carried out according to the general procedure A on 0.2 mmol scale (24 h); purified by flash column chromatography on SiO<sub>2</sub> (eluent: petroleum ether/ethyl acetate) to afford **3dd**, 37.0 mg, 67%, light yellow oil; R<sub>f</sub> = 0.9 (petroleum ether/ethyl acetate 10:1). <sup>1</sup>H NMR (400 MHz, Chloroform-*d*) δ 7.02 – 6.98 (m, 2H), 6.72 (d, *J* = 8.2 Hz, 1H), 5.67 (s, 1H), 3.87 (s, 2H), 3.79 (s, 3H), 2.18 (s, 3H), 1.74 (d, *J* = 1.5 Hz, 3H), 1.50 (s, 9H). <sup>13</sup>C NMR (101 MHz, Chloroform-*d*) δ 166.1, 156.2, 156.1, 131.2, 130.6, 127.0, 126.4, 118.5, 109.8, 79.7, 55.3, 37.7, 28.2, 24.3, 16.2. HRMS (ESI) Calculated for C<sub>17</sub>H<sub>24</sub>O<sub>3</sub> [M+H]<sup>+</sup>: 277.1798, found: 277.1789. IR ν (neat, cm<sup>-1</sup>): 2976, 1706, 1647, 1504, 1366, 1251, 1152, 1134, 1035, 863.

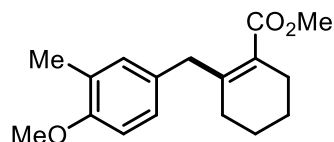

*methyl 2-(4-methoxy-3-methylbenzyl)cyclohex-1-ene-1-carboxylate (3ee)*. The reaction was carried out according to the general procedure A on 0.2 mmol scale (24 h); purified by flash column chromatography on SiO<sub>2</sub> (eluent: petroleum ether/ethyl acetate) to afford **3ee**, 38.9 mg, 71%, light yellow oil; R<sub>f</sub> = 0.9 (petroleum ether/ethyl acetate 10:1). <sup>1</sup>H NMR (400 MHz, Chloroform-*d*) δ 7.00 – 6.92 (m, 2H), 6.72 (d, *J* = 7.9 Hz, 1H), 3.79 (s, 3H), 3.74 (s, 3H), 3.62 (s, 2H), 2.36 – 2.32 (m, 2H), 2.19 (s, 3H), 2.03 – 2.00 (m, 2H), 1.63 – 1.50 (m, 4H). <sup>13</sup>C NMR (101 MHz, Chloroform-*d*) δ 169.8, 156.1, 146.8, 131.4, 131.2, 126.8, 126.3, 125.4, 109.7, 55.3, 51.3, 39.8, 30.2, 26.7, 22.2, 22.1, 16.2. HRMS (ESI) Calculated for C<sub>17</sub>H<sub>22</sub>O<sub>3</sub> [M+H]<sup>+</sup>: 275.1642, found: 275.1632. IR ν (neat, cm<sup>-1</sup>): 2930, 1711, 1503, 1433, 1277, 1251, 1134, 1036, 1079, 1025, 833.

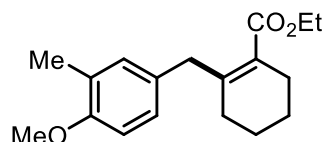

*ethyl 2-(4-methoxy-3-methylbenzyl)cyclohex-1-ene-1-carboxylate (3ff)*. The reaction was carried out according to the general procedure A on 0.2 mmol scale (24 h); purified by flash column chromatography on SiO<sub>2</sub> (eluent: petroleum ether/ethyl acetate) to afford **3ff**, 40.3 mg, 70%, light yellow oil; R<sub>f</sub> = 0.9 (petroleum ether/ethyl acetate 10:1). <sup>1</sup>H NMR (400 MHz, Chloroform-*d*) δ 7.01 – 6.98 (m, 2H), 6.73 – 6.71 (m, 1H), 4.2 (q, *J* = 7.1 Hz, 2H), 3.79 (s, 3H), 3.60 (s, 2H), 2.36 – 2.32 (m, 2H), 2.19 (s, 3H), 2.02 – 1.99 (m, 2H), 1.63 – 1.50 (m, 4H), 1.29 (t, *J* = 7.1 Hz, 3H). <sup>13</sup>C NMR (101 MHz, Chloroform-*d*) δ 169.6, 156.1, 145.8, 131.4, 131.2, 126.8, 126.2, 125.8, 109.8, 60.1, 55.29, 39.8, 30.1, 26.8, 22.3, 22.2, 16.2, 14.3. HRMS (ESI) Calculated for C<sub>17</sub>H<sub>22</sub>O<sub>3</sub> [M+H]<sup>+</sup>: 275.1642, found: 275.1632. IR ν (neat, cm<sup>-1</sup>): 2930, 1709, 1504, 1252, 1224, 1134, 1046.

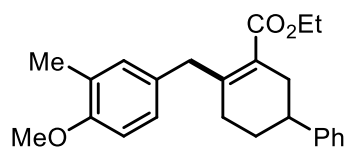

*ethyl 4-(4-methoxy-3-methylbenzyl)-1,2,5,6-tetrahydro-[1,1'-biphenyl]-3-carboxylate (3gg)*. The reaction was carried out according to the general procedure A on 0.2 mmol scale (24 h); purified by flash column chromatography on SiO<sub>2</sub> (eluent: petroleum ether/ethyl acetate) to afford **3gg**, 57.5 mg, 79%, light yellow oil; R<sub>f</sub> = 0.9 (petroleum ether/ethyl acetate 10:1). <sup>1</sup>H NMR (400 MHz, Chloroform-*d*) δ 7.31 – 7.24 (m, 2H), 7.23 – 7.17 (m, 3H), 7.05 – 7.02 (m, 2H), 6.74 (d, *J* = 8.8 Hz, 1H), 4.21 (q, *J* = 7.1 Hz, 2H), 3.80 (s, 3H), 3.74 – 3.62 (m, 2H), 2.79 – 2.68 (m, 2H), 2.45 – 2.36 (m, 1H), 2.21 – 2.18 (s, 4H), 1.89 – 1.86 (m, 1H), 1.74 – 1.65 (m, 1H), 1.28 (t, *J* = 7.2 Hz, 3H). <sup>13</sup>C NMR (101 MHz, Chloroform-*d*) δ 169.0, 156.2, 146.1, 146.1, 131.3, 131.2, 128.4, 126.9, 126.8, 126.3, 126.2, 125.4, 109.8, 60.2, 55.3, 39.8, 39.4, 34.8, 30.9, 29.1, 16.2, 14.3. HRMS (ESI) Calculated for C<sub>24</sub>H<sub>28</sub>O<sub>3</sub> [M+H]<sup>+</sup>: 365.2111, found: 365.2098. IR ν (neat, cm<sup>-1</sup>): 2926, 1708, 1503, 1464, 1251, 1235, 1208, 1132, 1036, 755, 701.

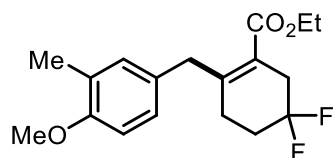

*ethyl 5,5-difluoro-2-(4-methoxy-3-methylbenzyl)cyclohex-1-ene-1-carboxylate (3hh)*.  $^1\text{H}$  NMR The reaction was carried out according to the general procedure A on 0.2 mmol scale (24 h); purified by flash column chromatography on  $\text{SiO}_2$  (eluent: petroleum ether/ethyl acetate) to afford **3hh**, 49.9 mg, 77%, light yellow oil;  $R_f = 0.8$  (petroleum ether/ethyl acetate 10:1). R (400 MHz, Chloroform-*d*)  $\delta$  6.99 – 6.97 (m, 2H), 6.73 (d,  $J = 8.9$  Hz, 1H), 4.23 (q,  $J = 7.1$  Hz, 2H), 3.80 (s, 3H), 3.76 (s, 2H), 2.87 (t,  $J = 14.9$  Hz, 2H), 2.33 (t,  $J = 6.8$  Hz, 2H), 2.19 (s, 3H), 1.99 – 1.88 (m, 2H), 1.30 (t,  $J = 7.1$  Hz, 3H).  $^{13}\text{C}$  NMR (101 MHz, Chloroform-*d*)  $\delta$  167.0, 156.4, 147.4, 131.1, 130.4, 126.8, 126.6, 122.4, 121.0 (t,  $J = 5.7$  Hz), 109.9, 60.6, 55.3, 38.7, 35.7 (t,  $J = 27.9$  Hz), 29.8 (t,  $J = 24.3$  Hz), 28.8 (t,  $J = 5.4$  Hz), 16.2, 14.2.  $^{19}\text{F}$  NMR (376 MHz, Chloroform-*d*)  $\delta$  -96.67. HRMS (ESI) Calculated for  $\text{C}_{18}\text{H}_{22}\text{F}_2\text{O}_3$   $[\text{M}+\text{H}]^+$ : 325.1610, found: 325.1601. IR  $\nu$  (neat,  $\text{cm}^{-1}$ ): 2928, 1715, 1504, 1374, 1253, 1235, 1115, 1077, 960.

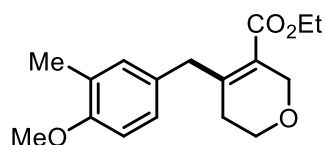

*methyl 4-(4-methoxy-3-methylbenzyl)-5,6-dihydro-2H-pyran-3-carboxylate (3ii)*. The reaction was carried out according to the general procedure A on 0.2 mmol scale (24 h); purified by flash column chromatography on  $\text{SiO}_2$  (eluent: petroleum ether/ethyl acetate) to afford **3ii**, 40.3 mg, 73%, light yellow oil;  $R_f = 0.5$  (petroleum ether/ethyl acetate 10:1).  $^1\text{H}$  NMR (400 MHz, Chloroform-*d*)  $\delta$  7.01 – 6.96 (m, 2H), 6.75 – 6.72 (m, 1H), 4.35 (s, 2H), 3.85 (s, 2H), 3.80 (s, 3H), 3.76 (s, 3H), 3.68 (t,  $J = 5.6$  Hz, 2H), 2.19 – 2.13 (m, 5H).  $^{13}\text{C}$  NMR (101 MHz, Chloroform-*d*)  $\delta$  166.3, 156.3, 148.6, 131.2, 130.3, 127.0, 126.5, 123.7, 109.9, 65.6, 63.9, 55.3, 51.3, 38.9, 29.9, 16.2. HRMS (ESI) Calculated for  $\text{C}_{16}\text{H}_{20}\text{O}_4$   $[\text{M}+\text{H}]^+$ : 277.1434, found: 277.1428. IR  $\nu$  (neat,  $\text{cm}^{-1}$ ): 2951, 1716, 1503, 1256, 1231, 1130, 1078, 1040.

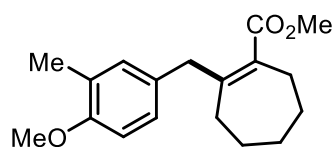

*methyl 2-(4-methoxy-3-methylbenzyl)cyclohept-1-ene-1-carboxylate (3jj)*. The reaction was carried out according to the general procedure A on 0.2 mmol scale (24 h); purified by flash column chromatography on  $\text{SiO}_2$  (eluent: petroleum ether/ethyl acetate) to afford **3jj**, 50.5 mg, 83%, light yellow oil;  $R_f = 0.8$  (petroleum ether/ethyl acetate 10:1).  $^1\text{H}$  NMR (400 MHz, Chloroform-*d*)  $\delta$  7.03 – 6.99 (m, 2H), 6.73 (d,  $J = 8.1$  Hz, 1H), 3.79 (s, 3H), 3.74 (s, 3H), 3.55 (s, 2H), 2.49 – 2.46 (m, 2H), 2.19 – 2.15 (m, 5H), 1.74 – 1.68 (m, 2H), 1.57 – 1.51 (m, 2H), 1.36 – 1.30 (m, 2H).  $^{13}\text{C}$  NMR (101 MHz, Chloroform-*d*)  $\delta$  170.8, 156.2, 151.8, 131.5, 131.4, 130.4, 127.2, 126.2, 109.7, 55.3, 51.4, 41.1, 34.4, 32.3, 30.3, 26.5, 25.6, 16.2. HRMS (ESI) Calculated for  $\text{C}_{18}\text{H}_{24}\text{O}_3$   $[\text{M}+\text{H}]^+$ : 289.1798, found: 289.1789. IR  $\nu$  (neat,  $\text{cm}^{-1}$ ): 2923, 2851, 1711, 1504, 1441, 1288, 1200, 1134, 1033.



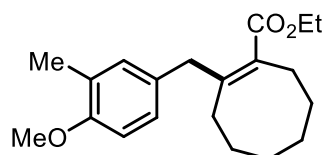

*ethyl (Z)-2-(4-methoxy-3-methylbenzyl)cyclooct-1-ene-1-carboxylate (3kk)*. The reaction was carried out according to the general procedure A on 0.2 mmol scale (24 h); purified by flash column chromatography on SiO<sub>2</sub> (eluent: petroleum ether/ethyl acetate) to afford **3kk**, 53.7 mg, 85%, light yellow oil; R<sub>f</sub> = 0.9 (petroleum ether/ethyl acetate 10:1). <sup>1</sup>H NMR (400 MHz, Chloroform-*d*) δ 7.05 – 7.03 (m, 2H), 6.72 (d, *J* = 8.9 Hz, 1H), 4.22 (q, *J* = 7.2 Hz, 2H), 3.79 (s, 3H), 3.58 (s, 2H), 2.45 – 2.42 (m, 2H), 2.19 – 2.14 (m, 5H), 1.71 – 1.65 (m, 2H), 1.49 – 1.43 (m, 6H), 1.29 (t, *J* = 7.1 Hz, 3H). <sup>13</sup>C NMR (101 MHz, Chloroform-*d*) δ 170.0, 156.1, 148.1, 131.5, 131.1, 128.7, 127.2, 126.2, 109.7, 60.0, 55.3, 38.9, 31.2, 29.9, 28.9, 28.6, 26.7, 26.2, 16.2, 14.3.

HRMS (ESI) Calculated for C<sub>20</sub>H<sub>28</sub>O<sub>3</sub> [M+H]<sup>+</sup>: 317.2111, found: 317.2101. IR ν (neat, cm<sup>-1</sup>): 2923, 1707, 1504, 1290, 1253, 1200, 1180, 1133, 1038.

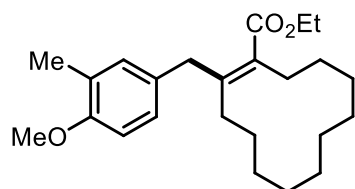

*ethyl (Z)-2-(4-methoxy-3-methylbenzyl)cyclododec-1-ene-1-carboxylate (3II)*. The reaction was carried out according to the general procedure A on 0.2 mmol scale (24 h); purified by flash column chromatography on SiO<sub>2</sub> (eluent: petroleum ether/ethyl acetate) to afford **3II**, 53.7 mg, 72%, light yellow oil; R<sub>f</sub> = 0.9 (petroleum ether/ethyl acetate 10:1). <sup>1</sup>H NMR (400 MHz, Chloroform-*d*) δ 6.97 – 6.93 (m, 2H), 6.71 (d, *J* = 7.9 Hz, 1H), 4.22 (q, *J* = 7.1 Hz, 1H), 3.79 (s, 2H), 3.48 (s, 2H), 2.40 (t, *J* = 7.3 Hz, 2H), 2.18 (s, 3H), 2.03 (t, *J* = 7.4 Hz, 2H), 1.55 – 1.33 (m, 16H), 1.29 (t, *J* = 7.2 Hz, 3H). <sup>13</sup>C NMR (101 MHz, Chloroform-*d*) δ 171.1, 156.1, 142.8, 131.4, 131.1, 131.1, 126.8, 126.3, 109.7, 60.2, 55.3, 37.8, 27.3, 27.1, 26.1, 25.6, 25.4, 25.0, 24.8, 24.8, 22.5, 16.2, 14.3. HRMS (ESI) Calculated for C<sub>24</sub>H<sub>36</sub>O<sub>3</sub> [M+H]<sup>+</sup>: 373.2737, found: 373.2728. IR ν (neat, cm<sup>-1</sup>): 2927, 2859, 1716, 1504, 1467, 1252, 1212, 1134, 1036.

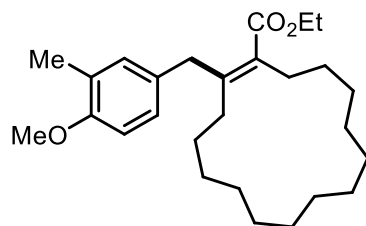

*ethyl (Z)-2-(4-methoxy-3-methylbenzyl)cyclopentadec-1-ene-1-carboxylate (3mm)*. The reaction was carried out according to the general procedure A on 0.2 mmol scale (24 h); purified by flash column chromatography on SiO<sub>2</sub> (eluent: petroleum ether/ethyl acetate) to afford **3mm**, 69.7 mg, 84%, light yellow oil; R<sub>f</sub> = 0.8 (petroleum ether/ethyl acetate 10:1). <sup>1</sup>H NMR (400 MHz, Chloroform-*d*) δ 6.98 (d, *J* = 6.8 Hz, 2H), 6.71 (d, *J* = 9.0 Hz, 1H), 4.20 (q, *J* = 7.2 Hz, 2H), 3.78 (s, 3H), 3.50 (s, 2H), 2.36 – 2.27 (m, 2H), 2.18 (s, 3H), 2.01 – 1.91 (m, 2H), 1.53 – 1.25 (m, 25H). <sup>13</sup>C NMR (101 MHz, Chloroform-*d*) δ 170.7, 156.1, 144.6, 131.3, 131.2, 130.3, 126.9, 126.2, 109.7, 60.1, 55.2, 38.7, 31.3, 29.9, 27.6, 27.4, 26.8, 26.8, 26.7, 26.6, 26.1, 26.1,

25.4, 25.4, 16.2, 14.2. HRMS (ESI) Calculated for C<sub>27</sub>H<sub>42</sub>O<sub>3</sub> [M+H]<sup>+</sup>: 415.3208, found: 415.3198.

IR  $\nu$  (neat, cm<sup>-1</sup>): 2927, 2857, 1713, 1504, 1462, 1253, 1222, 1134, 1036.

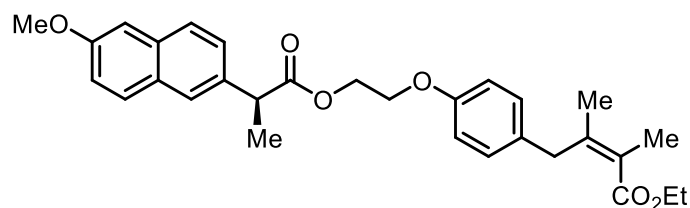

*ethyl (S,Z)-4-(4-(2-((2-(6-methoxynaphthalen-2-yl)propanoyl)oxy)ethoxy)phenoxy)-2,3-dimethylbut-2-enoate (4a)*. The reaction was carried out according to the general procedure A on 0.2 mmol scale (24 h); purified by flash column chromatography on SiO<sub>2</sub> (eluent: petroleum ether/ethyl acetate) to afford **4a**, 78.6 mg, 80%, light yellow oil; R<sub>f</sub> = 0.3 (petroleum ether/ethyl acetate 10:1). <sup>1</sup>H NMR (400 MHz, Chloroform-*d*)  $\delta$  7.67 – 7.64 (m, 3H), 7.39 (dd, *J* = 8.6, 1.8 Hz, 1H), 7.13 – 7.08 (m, 4H), 6.74 (d, *J* = 8.7 Hz, 2H), 4.46 – 4.32 (m, 2H), 4.21 (q, *J* = 7.2 Hz, 2H), 4.07 (t, *J* = 4.8 Hz, 2H), 3.88 (s, 3H), 3.61 (s, 2H), 1.90 (s, 3H), 1.65 (s, 3H), 1.57 (d, *J* = 7.2 Hz, 3H), 1.28 (t, *J* = 7.2 Hz, 3H). <sup>13</sup>C NMR (101 MHz, Chloroform-*d*)  $\delta$  174.5, 169.9, 157.6, 156.8, 143.2, 135.4, 133.6, 132.1, 129.8, 129.2, 128.8, 127.1, 126.1, 125.9, 124.1, 118.9, 114.5, 105.5, 65.8, 63.1, 60.2, 55.2, 45.2, 40.7, 19.2, 18.5, 15.9, 14.2. HRMS (ESI) Calculated for C<sub>30</sub>H<sub>34</sub>O<sub>6</sub> [M+H]<sup>+</sup>: 491.2428, found: 491.2412. IR  $\nu$  (neat, cm<sup>-1</sup>): 2978, 2936, 1734, 1509, 1270, 1174, 1077, 925.

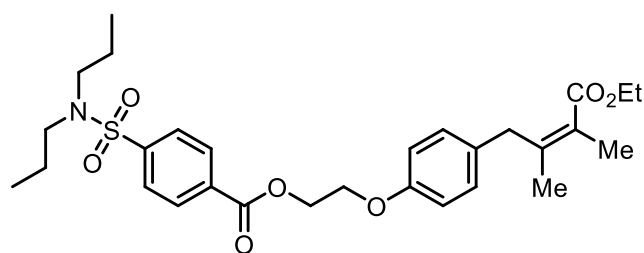

*(Z)-2-(4-(4-ethoxy-2,3-dimethyl-4-oxobut-2-en-1-yl)phenoxy)ethyl 4-(N,N-dipropylsulfamoyl)benzoate (4b)*. The reaction was carried out according to the general procedure A on 0.2 mmol scale (24 h); purified by flash column chromatography on SiO<sub>2</sub> (eluent: petroleum ether/ethyl acetate) to afford **4b**, 81.9 mg, 75%, light yellow oil; R<sub>f</sub> = 0.2 (petroleum ether/ethyl acetate 10:1). <sup>1</sup>H NMR (400 MHz, Chloroform-*d*)  $\delta$  8.18 – 8.16 (m, 2H), 7.88 – 7.86 (m, 2H), 7.18 – 7.16 (m, 2H), 6.87 – 6.85 (m, 2H), 4.70 – 4.67 (m, 2H), 4.31 – 4.29 (m, 2H), 4.22 (q, *J* = 7.2 Hz, 2H), 3.63 (s, 2H), 3.12 – 3.08 (m, 4H), 1.91 (s, 3H), 1.67 (s, 3H), 1.59 – 1.50 (m, 4H), 1.29 (t, *J* = 7.1 Hz, 3H), 0.87 (t, *J* = 7.4 Hz, 6H). <sup>13</sup>C NMR (101 MHz, Chloroform-*d*)  $\delta$  169.9, 165.1, 156.8, 144.3, 143.1, 133.1, 132.4, 130.3, 129.9, 126.9, 124.2, 114.5, 65.8, 64.0, 60.2, 49.8, 40.7, 21.8, 19.2, 15.9, 14.2, 11.1. HRMS (ESI) Calculated for C<sub>29</sub>H<sub>39</sub>NO<sub>7</sub>S [M+H]<sup>+</sup>: 546.2520, found: 546.2510. IR  $\nu$  (neat, cm<sup>-1</sup>): 2967, 1722, 1509, 1343, 1240, 1174, 1087, 993, 778, 694.

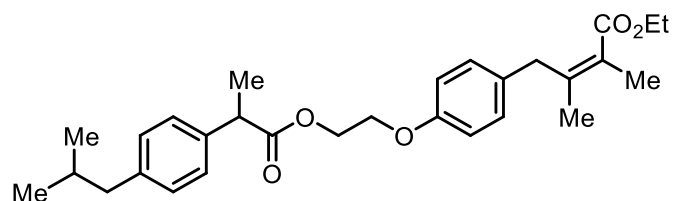

*ethyl (Z)-4-(4-(2-((2-(4-isobutylphenyl)propanoyl)oxy)ethoxy)phenyl)-2,3-dimethylbut-2-enoate (4c)*. The reaction was carried out according to the general procedure A on 0.2 mmol scale (24 h); purified by flash column chromatography on SiO<sub>2</sub> (eluent: petroleum ether/ethyl acetate) to afford **4c**, 79.4 mg, 85%, light yellow oil; R<sub>f</sub> = 0.5 (petroleum ether/ethyl acetate 10:1). <sup>1</sup>H NMR (400 MHz, Chloroform-*d*) δ 7.20 (d, *J* = 8.2 Hz, 2H), 7.13 (d, *J* = 8.7 Hz, 2H), 7.06 (d, *J* = 8.2 Hz, 2H), 6.77 (d, *J* = 8.7 Hz, 2H), 4.46 – 4.33 (m, 2H), 4.22 (q, *J* = 7.2 Hz, 2H), 4.09 (t, *J* = 4.8 Hz, 2H), 3.73 (q, *J* = 7.1 Hz, 1H), 3.62 (s, 2H), 2.43 (d, *J* = 7.1 Hz, 2H), 1.91 (s, 3H), 1.82 (dq, *J* = 13.6, 6.8 Hz, 1H), 1.66 (s, 3H), 1.49 (d, *J* = 7.1 Hz, 3H), 1.29 (t, *J* = 7.1 Hz, 3H), 0.88 (d, *J* = 6.6 Hz, 6H). <sup>13</sup>C NMR (101 MHz, Chloroform-*d*) δ 174.7, 169.9, 156.9, 143.2, 140.5, 137.5, 132.1, 129.8, 129.3, 127.1, 124.2, 114.5, 65.9, 63.0, 60.2, 45.0, 45.0, 40.7, 30.1, 22.3, 19.2, 18.5, 15.9, 14.2. HRMS (ESI) Calculated for C<sub>29</sub>H<sub>38</sub>O<sub>5</sub> [M+H]<sup>+</sup>: 467.2792, found: 467.2792. IR ν (neat, cm<sup>-1</sup>): 2955, 2930, 1736, 1710, 1510, 1299, 1244, 1166, 1102, 1077.

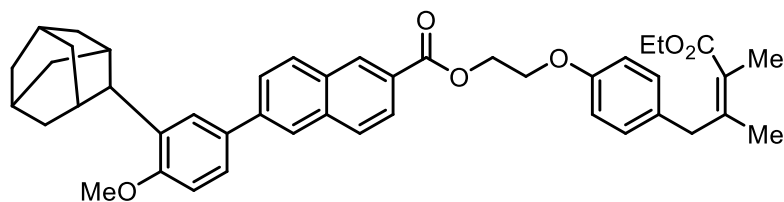

(*Z*)-2-(4-(4-ethoxy-2,3-dimethyl-4-oxobut-2-en-1-yl)phenoxy)ethyl 6-(3-(adamantan-2-yl)-4-methoxyphenyl)-2-naphthoate (**4d**). The reaction was carried out according to the general procedure A on 0.2 mmol scale (24 h); purified by flash column chromatography on SiO<sub>2</sub> (eluent: petroleum ether/ethyl acetate) to afford **4d**, 29.6 mg, 22%, light yellow oil; R<sub>f</sub> = 0.4 (petroleum ether/ethyl acetate 10:1). <sup>1</sup>H NMR (400 MHz, Chloroform-*d*) δ 8.61 (s, 1H), 8.07 (dd, *J* = 8.6, 1.8 Hz, 1H), 8.00 – 7.97 (m, 2H), 7.90 (d, *J* = 8.7 Hz, 1H), 7.79 (dd, *J* = 8.6, 1.8 Hz, 1H), 7.60 (d, *J* = 2.3 Hz, 1H), 7.54 (dd, *J* = 8.4, 2.4 Hz, 1H), 7.18 (d, *J* = 8.7 Hz, 2H), 6.99 (d, *J* = 8.4 Hz, 1H), 6.92 – 6.88 (m, 2H), 4.72 (dd, *J* = 5.5, 4.2 Hz, 2H), 4.34 (dd, *J* = 5.4, 4.2 Hz, 2H), 4.22 (q, *J* = 7.2 Hz, 2H), 3.90 (s, 3H), 3.63 (s, 2H), 2.18 (d, *J* = 3.3 Hz, 6H), 2.10 (s, 3H), 1.91 (d, *J* = 1.0 Hz, 3H), 1.80 (s, 6H), 1.66 (d, *J* = 1.1 Hz, 3H), 1.31 – 1.25 (m, 6H). <sup>13</sup>C NMR (101 MHz, Chloroform-*d*) δ 170.0, 166.8, 158.9, 157.0, 143.2, 141.4, 139.0, 136.0, 132.5, 132.3, 131.2, 131.0, 130.0, 129.7, 128.2, 126.6, 126.5, 126.0, 125.7, 125.6, 124.7, 124.2, 114.6, 112.1, 66.1, 63.5, 60.3, 55.1, 40.8, 40.6, 37.1, 29.1, 19.3, 16.0, 14.3. HRMS (ESI) Calculated for C<sub>44</sub>H<sub>48</sub>O<sub>6</sub> [M+H]<sup>+</sup>: 673.3524, found: 673.3510. IR ν (neat, cm<sup>-1</sup>): 2903, 1715, 1629, 1509, 1278, 1237, 1216, 1139, 1076, 809.

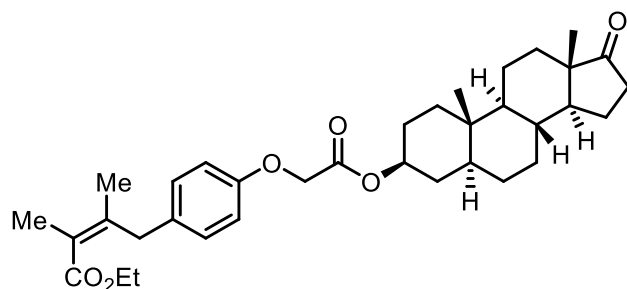

ethyl (*Z*)-4-(4-(2-(((3*S*,5*S*,8*R*,9*S*,10*S*,13*S*,14*S*)-10,13-dimethyl-17-oxohexadecahydro-1*H*-cyclopenta[*a*]phenanthren-3-yl)oxy)-2-oxoethoxy)phenyl)-2,3-dimethylbut-2-enoate (**4e**). The reaction was carried out according to the general procedure A on 0.2 mmol scale (24 h); purified by flash column chromatography on SiO<sub>2</sub> (eluent: petroleum ether/ethyl acetate) to afford **4e**, 87.0 mg, 77%, light yellow oil; R<sub>f</sub> = 0.2 (petroleum ether/ethyl acetate 10:1). <sup>1</sup>H NMR (400 MHz, Chloroform-*d*) δ 7.15 (d, *J* = 8.7 Hz, 2H), 6.81 (d, *J* = 8.7 Hz, 2H), 4.83 (ddd, *J* = 11.5, 6.5, 4.9 Hz, 1H), 4.55 (s, 2H), 4.21 (q, *J* = 7.1 Hz, 2H), 3.62 (s, 2H), 2.43 (dd, *J* = 19.3, 8.1 Hz, 1H), 2.16 – 2.02 (m, 1H), 1.97 – 1.60 (m, 1H), 1.60 – 1.15 (m, 13H), 1.12 – 0.93 (m, 2H), 0.85 (d, *J* = 3.4 Hz, 6H), 0.77 – 0.66 (m, 1H). <sup>13</sup>C NMR (101 MHz, Chloroform-*d*) δ 221.1, 169.9, 168.5, 156.3, 143.1, 132.7, 129.8, 124.2, 114.5, 74.6, 65.7, 60.2, 54.2, 51.3, 47.7, 44.5, 40.7, 36.5, 35.7, 35.5, 34.9, 33.7, 31.4, 30.7, 28.2, 27.2, 21.7, 20.4, 19.2, 15.9, 14.2, 13.7, 12.1. HRMS (ESI) Calculated for C<sub>35</sub>H<sub>48</sub>O<sub>6</sub> [M+H]<sup>+</sup>: 565.3524, found: 565.3516. IR ν (neat, cm<sup>-1</sup>): 2931, 2855, 1737, 1708, 1509, 1444, 1273, 1233, 1195, 1176, 1103, 1080, 1013.

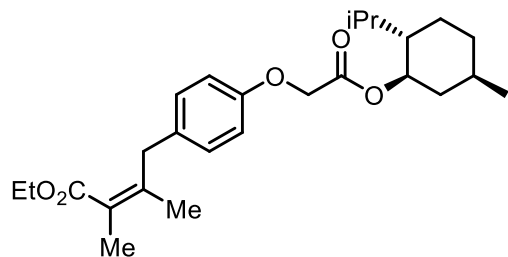

*ethyl (Z)-4-(4-(2-(((1R,2S,5R)-2-isopropyl-5-methylcyclohexyl)oxy)-2-oxoethoxy)phenyl)-2,3-dimethylbut-2-enoate (4f)*. The reaction was carried out according to the general procedure A on 0.2 mmol scale (24 h); purified by flash column chromatography on SiO<sub>2</sub> (eluent: petroleum ether/ethyl acetate) to afford **4f**, 49.1 mg, 57%, light yellow oil; R<sub>f</sub> = 0.5 (petroleum ether/ethyl acetate 10:1). <sup>1</sup>H NMR (400 MHz, Chloroform-*d*) δ 7.14 (d, *J* = 8.7 Hz, 2H), 6.81 (d, *J* = 8.8 Hz, 2H), 4.80 (td, *J* = 10.9, 4.4 Hz, 1H), 4.57 (d, *J* = 1.6 Hz, 2H), 4.21 (q, *J* = 7.1 Hz, 1H), 3.62 (s, 2H), 2.06 – 1.99 (m, 1H), 1.90 (d, *J* = 1.0 Hz, 3H), 1.77 – 1.65 (m, 6H), 1.54 – 1.27 (m, 6H), 1.10 – 1.01 (m, 1H), 0.91 – 0.84 (m, 7H), 0.72 (d, *J* = 6.8 Hz, 3H). <sup>13</sup>C NMR (101 MHz, Chloroform-*d*) δ 169.9, 168.1, 156.3, 143.1, 132.7, 129.9, 124.2, 114.4, 75.4, 65.6, 60.2, 46.9, 40.7, 40.7, 34.1, 31.3, 26.1, 23.3, 21.9, 20.7, 19.2, 16.1, 15.9, 14.2. HRMS (ESI) Calculated for C<sub>26</sub>H<sub>38</sub>O<sub>5</sub> [M+H]<sup>+</sup>: 431.2792, found: 431.2791. IR ν (neat, cm<sup>-1</sup>): 2955, 2927, 1757, 1711, 1509, 1274, 1196, 1176, 1103, 1081.

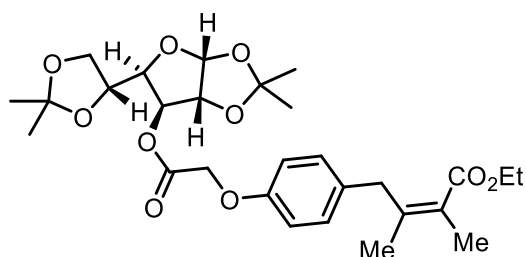

*ethyl (Z)-4-(4-(2-(((3aR,5R,6S,6aR)-5-((R)-2,2-dimethyl-1,3-dioxolan-4-yl)-2,2-dimethyltetrahydrofuro[2,3-d][1,3]dioxol-6-yl)oxy)-2-oxoethoxy)phenyl)-2,3-dimethylbut-2-enoate (4g)*. The reaction was carried out according to the general procedure A on 0.2 mmol scale (24 h); purified by flash column chromatography on SiO<sub>2</sub> (eluent: petroleum ether/ethyl acetate) to afford **4g**, 47.1 mg, 44%, light yellow oil; R<sub>f</sub> = 0.2 (petroleum ether/ethyl acetate 10:1). <sup>1</sup>H NMR (400 MHz, Chloroform-*d*) δ 7.16 (d, *J* = 8.7 Hz, 2H), 6.82 (d, *J* = 8.8 Hz, 2H), 5.79 (d, *J* = 3.7 Hz, 1H), 5.39 (d, *J* = 3.1 Hz, 1H), 4.64 (s, 2H), 4.46 (s, 1H), 4.24 – 4.18 (m, 3H), 4.15 – 4.11 (m, 1H), 4.07 – 3.98 (m, 2H), 3.62 (s, 2H), 1.90 (s, 3H), 1.65 (s, 3H), 1.51 (s, 3H), 1.40 (s, 3H), 1.31 – 1.27 (m, 9H). <sup>13</sup>C NMR (101 MHz, Chloroform-*d*) δ 169.9, 167.9, 156.1, 143.0, 133.1, 130.0, 124.4, 114.5, 112.4, 109.4, 105.1, 83.2, 79.8, 72.4, 67.2, 65.4, 60.3, 40.7, 26.9, 26.7, 26.2, 25.2, 19.3, 15.9, 14.3. HRMS (ESI) Calculated for C<sub>28</sub>H<sub>38</sub>O<sub>10</sub> [M+H]<sup>+</sup>: 525.2538, found: 525.2533. IR ν (neat, cm<sup>-1</sup>): 2987, 1772, 1708, 1509, 1374, 1215, 1164, 1076, 844.

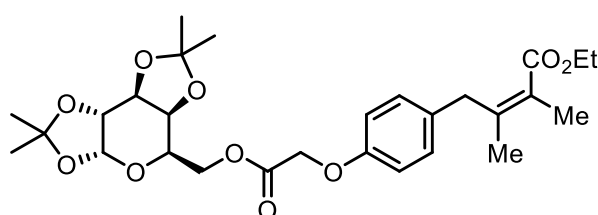

ethyl (Z)-2,3-dimethyl-4-(4-(2-oxo-2-(((3aR,5R,5aS,8aS,8bR)-2,2,7,7-tetramethyltetrahydro-5H-bis([1,3]dioxolo)[4,5-b:4',5'-d]pyran-5-yl)methoxy)ethoxy)phenyl)but-2-enoate (**4h**). The reaction was carried out according to the general procedure A on 0.2 mmol scale (24 h); purified by flash column chromatography on SiO<sub>2</sub> (eluent: petroleum ether/ethyl acetate) to afford **4h**, 52.4 mg, 49%, light yellow oil; R<sub>f</sub> = 0.2 (petroleum ether/ethyl acetate 10:1). <sup>1</sup>H NMR (400 MHz, Chloroform-*d*) δ 7.14 (d, *J* = 8.7 Hz, 2H), 6.82 (d, *J* = 8.8 Hz, 2H), 5.54 (d, *J* = 5.0 Hz, 1H), 4.64 (s, 2H), 4.61 (dd, *J* = 7.8, 2.6 Hz, 1H), 4.42 (dd, *J* = 11.6, 4.6 Hz, 1H), 4.37 – 4.30 (m, 2H), 4.20 (dd, *J* = 7.9, 6.3 Hz, 3H), 4.09 – 4.02 (m, 1H), 3.62 (s, 2H), 1.90 (s, 3H), 1.66 (s, 3H), 1.49 (s, 3H), 1.45 (s, 3H), 1.33 (s, 6H), 1.29 (t, *J* = 7.2 Hz, 3H). <sup>13</sup>C NMR (101 MHz, Chloroform-*d*) δ 169.9, 168.9, 156.3, 143.1, 132.7, 129.9, 124.2, 114.6, 109.7, 108.8, 96.2, 70.9, 70.6, 70.3, 65.8, 65.4, 64.0, 60.2, 40.7, 26.0, 25.9, 24.9, 24.4, 19.3, 15.9, 14.2. HRMS (ESI) Calculated for C<sub>28</sub>H<sub>38</sub>O<sub>10</sub> [M+H]<sup>+</sup>: 535.2538, found: 535.2530. IR ν (neat, cm<sup>-1</sup>): 2985, 1762, 1708, 1509, 1381, 1167, 1004, 859, 511.

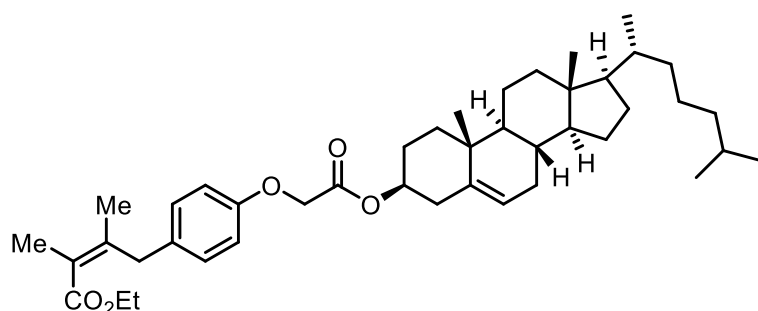

ethyl (Z)-4-(4-(2-(((3S,8S,9S,10R,13R,14S,17R)-10,13-dimethyl-17-((R)-6-methylheptan-2-yl)-2,3,4,7,8,9,10,11,12,13,14,15,16,17-tetradecahydro-1H-cyclopenta[*a*]phenanthren-3-yl)oxy)-2-oxoethoxy)phenyl)-2,3-dimethylbut-2-enoate (**4i**). The reaction was carried out according to the general procedure A on 0.2 mmol scale (24 h); purified by flash column chromatography on SiO<sub>2</sub> (eluent: petroleum ether/ethyl acetate) to afford **4i**, 39.7 mg, 30%, light yellow oil; R<sub>f</sub> = 0.8 (petroleum ether/ethyl acetate 10:1). <sup>1</sup>H NMR (400 MHz, Chloroform-*d*) δ 7.15 (d, *J* = 8.7 Hz, 2H), 6.82 (d, *J* = 8.7 Hz, 2H), 5.38 (dd, *J* = 5.0, 1.7 Hz, 1H), 4.78 – 4.70 (m, 1H), 4.56 (s, 2H), 4.21 (q, *J* = 7.2 Hz, 2H), 3.62 (s, 2H), 2.34 (d, *J* = 8.2 Hz, 2H), 2.04 – 1.79 (m, 8H), 1.65 – 1.48 (m, 10H), 1.39 – 1.24 (m, 8H), 1.19 – 1.07 (m, 6H), 1.06 – 0.97 (m, 6H), 0.45 – 0.85 (m, 9H), 0.68 (s, 3H). <sup>13</sup>C NMR (101 MHz, Chloroform-*d*) δ 169.9, 168.5, 156.3, 143.1, 139.2, 132.7, 129.9, 124.2, 122.9, 114.5, 75.1, 65.7, 60.2, 56.6, 56.1, 50.0, 42.3, 40.7, 39.7, 39.5, 37.9, 36.9, 36.5, 36.1, 35.7, 31.8, 31.8, 28.2, 28.0, 27.6, 24.2, 23.8, 22.8, 22.5, 21.0, 19.2, 18.7, 15.92, 14.2, 11.8. HRMS (ESI) Calculated for C<sub>43</sub>H<sub>64</sub>O<sub>5</sub> [M+H]<sup>+</sup>: 661.4827, found: 661.4822. IR ν (neat, cm<sup>-1</sup>): 2936, 2868, 1760, 1711, 1509, 1274, 1195, 1176, 1103, 1081.

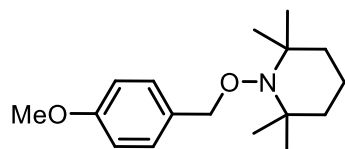

1-((4-methoxybenzyl)oxy)-2,2,6,6-tetramethylpiperidine (**11**). The reaction was carried out according to the general procedure A (extra 3 equiv. TEMPO was added) on 0.2 mmol scale (24 h); purified by flash column chromatography on SiO<sub>2</sub> (eluent: petroleum ether/ethyl acetate) to afford **11**, 2.2 mg, 4%, light yellow oil; R<sub>f</sub> = 0.8 (petroleum ether/ethyl acetate 10:1).

$^1\text{H}$  NMR (400 MHz, Chloroform-*d*)  $\delta$  7.31 – 7.27 (m, 2H), 6.89 – 6.86 (m, 2H), 4.74 (s, 2H), 3.80 (s, 3H), 1.61 – 1.48 (m, 6H), 1.26 (s, 6H), 1.13 (s, 6H).

$^{13}\text{C}$  NMR (101 MHz, Chloroform-*d*)  $\delta$  159.0, 130.4, 129.2, 113.7, 78.4, 60.0, 55.3, 39.7, 33.2, 20.3, 17.2.

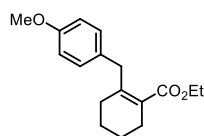

*ethyl 2-(4-methoxybenzyl)cyclohex-1-ene-1-carboxylate (13)*. The reaction was carried out according to the modified procedure on 0.2 mmol scale. Modified conditions: **PC** [Ir(dF(CF<sub>3</sub>)ppy)<sub>2</sub>(5,5'-dFbpy)]PF<sub>6</sub> (2 mol%), NiCl<sub>2</sub>•6H<sub>2</sub>O (10 mol%), 4,4'-Di-*tert*-butyl-2,2'-bipyridine (15%), **1** (0.4 mmol), **2a** (0.2 mmol), K<sub>2</sub>HPO<sub>4</sub> (0.4 mmol), DMF (2 mL), blue LEDs, 24 h; purified by flash column chromatography on SiO<sub>2</sub> (eluent: petroleum ether/ethyl acetate) to afford **13**, 32.9 mg, 60%, light yellow oil; R<sub>f</sub> = 0.8 (petroleum ether/ethyl acetate 10:1).  $^1\text{H}$  NMR (400 MHz, Chloroform-*d*)  $\delta$  7.14 (d, *J* = 8.6 Hz, 2H), 6.81 (d, *J* = 8.6 Hz, 2H), 4.21 (q, *J* = 7.1 Hz, 2H), 3.78 (s, 3H), 3.63 (s, 2H), 2.36 – 2.32 (m, 2H), 2.02 – 1.98 (m, 2H), 1.64 – 1.50 (m, 4H), 1.28 (t, *J* = 7.1 Hz, 3H).  $^{13}\text{C}$  NMR (101 MHz, Chloroform-*d*)  $\delta$  169.5, 157.9, 145.7, 131.9, 129.7, 126.0, 113.6, 60.1, 55.2, 39.8, 30.1, 26.7, 22.2, 22.2, 14.3. HRMS (ESI) Calculated for C<sub>17</sub>H<sub>22</sub>O<sub>3</sub> [M+H]<sup>+</sup>: 275.1642, found: 275.1634. IR  $\nu$  (neat, cm<sup>-1</sup>): 2931, 2856, 1415, 1246, 1207, 1143, 1052, 883, 832, 612.

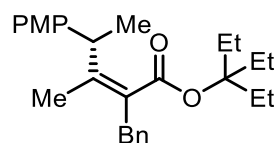

*3-ethylpentan-3-yl (S,Z)-2-benzyl-4-(4-methoxyphenyl)-3-methylpent-2-enoate (5a)*. The reaction was carried out according to the general procedure B on 0.1 mmol scale (36 h); purified by flash column chromatography on SiO<sub>2</sub> (eluent: petroleum ether/ethyl acetate) to afford **5a**, 26.6mg, 65%, light yellow oil; R<sub>f</sub> = 0.8 (petroleum ether/ethyl acetate 10:1).  $^1\text{H}$  NMR (400 MHz, Chloroform-*d*)  $\delta$  7.26 – 7.13 (m, 7H), 6.85 (d, *J* = 8.8 Hz, 2H), 4.63 (q, *J* = 7.1 Hz, 1H), 3.79 (s, 3H), 3.68 (d, *J* = 8.9 Hz, 2H), 1.78 (q, *J* = 7.6 Hz, 6H), 1.45 – 1.43 (m, 6H), 0.72 (t, *J* = 7.5 Hz, 9H).  $^{13}\text{C}$  NMR (101 MHz, Chloroform-*d*)  $\delta$  168.9, 157.9, 147.2, 139.6, 135.6, 128.5, 128.2, 128.1, 125.8, 113.5, 89.0, 55.2, 40.6, 36.1, 26.9, 16.9, 14.2, 7.6. HRMS (ESI) Calculated for C<sub>27</sub>H<sub>36</sub>O<sub>3</sub> [M+K]<sup>+</sup>: 447.2296, found: 447.2286. IR  $\nu$  (neat, cm<sup>-1</sup>): 2969, 2940, 1703, 1511, 1455, 1283, 1248, 1216, 1179, 1136, 1103, 1039, 833. HPLC analysis CHIRALCEL<sup>®</sup> two AD-H columns, n-hexane/iso-propanol = 98.5/1.5, flow rate 0.5 mL/min, 254 nm UV detector, *t*<sub>R</sub> (minor) = 23.820 min, *t*<sub>R</sub> (major) = 25.226 min. [ $\alpha$ ]<sub>D</sub><sup>25</sup> = -7 (c = 0.6, CH<sub>2</sub>Cl<sub>2</sub>); 91% ee

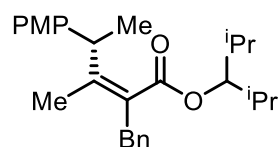

*2,4-dimethylpentan-3-yl (S,Z)-2-benzyl-4-(4-methoxyphenyl)-3-methylpent-2-enoate (5b)*. The reaction was carried out according to the general procedure B on 0.1 mmol scale (36 h); purified by flash column chromatography on SiO<sub>2</sub> (eluent: petroleum ether/ethyl acetate) to afford **5b**, 28.6 mg, 70%, light yellow oil; R<sub>f</sub> = 0.8 (petroleum ether/ethyl acetate 10:1).  $^1\text{H}$  NMR (400

MHz, Chloroform-*d*)  $\delta$  7.27 – 7.23 (m, 4H), 7.19 – 7.12 (m, 3H), 6.85 (d,  $J$  = 8.8 Hz, 2H), 4.76 – 4.66 (m, 2H), 3.79 (s, 3H), 3.74 (d,  $J$  = 8.3 Hz, 2H), 1.88 – 1.79 (m, 2H), 1.50 (s, 3H), 1.45 (d,  $J$  = 7.1 Hz, 3H), 0.80 – 0.73 (m, 12H).  $^{13}\text{C}$  NMR (101 MHz, Chloroform-*d*)  $\delta$  169.5, 157.9, 149.7, 139.4, 135.5, 128.5, 128.3, 128.0, 126.9, 125.9, 113.5, 82.9, 55.2, 40.6, 35.8, 29.4, 29.4, 19.5, 17.3, 17.1, 14.6. HRMS (ESI) Calculated for  $\text{C}_{27}\text{H}_{36}\text{O}_3$   $[\text{M}+\text{K}]^+$ : 447.2296, found: 447.2291. IR  $\nu$  (neat,  $\text{cm}^{-1}$ ): 2964, 2934, 1707, 1511, 1463, 1248, 1196, 1076, 833. HPLC analysis CHIRALCEL<sup>®</sup> two AD-H columns, n-hexane/iso-propanol = 98.5/1.5, flow rate 0.5 mL/min, 254 nm UV detector,  $t_{\text{R}}$  (minor) = 26.577 min,  $t_{\text{R}}$  (major) = 27.077 min.  $[\alpha]_{\text{D}}^{25}$  = -13 (c = 1.3,  $\text{CH}_2\text{Cl}_2$ ); 84% ee

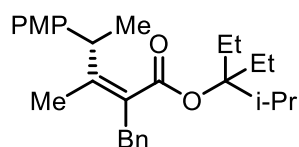

*3-ethyl-2-methylpentan-3-yl (S,Z)-2-benzyl-4-(4-methoxyphenyl)-3-methylpent-2-enoate (5c)*. The reaction was carried out according to the general procedure B on 0.1 mmol scale (36 h); purified by flash column chromatography on  $\text{SiO}_2$  (eluent: petroleum ether/ethyl acetate) to afford **5c**, 19.8 mg, 47%, light yellow oil;  $R_f$  = 0.8 (petroleum ether/ethyl acetate 10:1).  $^1\text{H}$  NMR (400 MHz, Chloroform-*d*)  $\delta$  7.26 – 7.13 (m, 7H), 6.85 (d,  $J$  = 8.8 Hz, 2H), 4.64 (q,  $J$  = 7.1 Hz, 1H), 3.79 (s, 3H), 3.69 (d,  $J$  = 6.7 Hz, 2H), 2.32 (h,  $J$  = 7.0 Hz, 1H), 1.94 – 1.78 (m, 4H), 1.45 – 1.43 (m, 6H), 0.85 (d,  $J$  = 7.0 Hz, 6H), 0.78 (td,  $J$  = 7.6, 3.1 Hz, 6H).  $^{13}\text{C}$  NMR (101 MHz, Chloroform-*d*)  $\delta$  169.1, 157.9, 147.3, 139.5, 135.6, 128.5, 128.2, 128.1, 125.8, 113.5, 91.0, 55.2, 40.5, 36.0, 33.9, 27.0, 27.0, 17.7, 17.0, 14.1, 8.8. HRMS (ESI) Calculated for  $\text{C}_{28}\text{H}_{38}\text{O}_3$   $[\text{M}+\text{K}]^+$ : 461.2453, found: 461.2448. IR  $\nu$  (neat,  $\text{cm}^{-1}$ ): 2968, 2936, 1703, 1511, 1455, 1248, 1220, 1200, 1077, 833. HPLC analysis CHIRALCEL<sup>®</sup> two AD-H columns, n-hexane/iso-propanol = 98.5/1.5, flow rate 0.5 mL/min, 254 nm UV detector,  $t_{\text{R}}$  (minor) = 21.223 min,  $t_{\text{R}}$  (major) = 23.154 min.  $[\alpha]_{\text{D}}^{25}$  = -16 (c = 0.4,  $\text{CH}_2\text{Cl}_2$ ); 90% ee

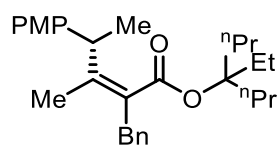

*4-ethylheptan-4-yl (S,Z)-2-benzyl-4-(4-methoxyphenyl)-3-methylpent-2-enoate (5d)*. The reaction was carried out according to the general procedure B on 0.1 mmol scale (36 h); purified by flash column chromatography on  $\text{SiO}_2$  (eluent: petroleum ether/ethyl acetate) to afford **5d**, 21.0 mg, 48%, light yellow oil;  $R_f$  = 0.8 (petroleum ether/ethyl acetate 10:1).  $^1\text{H}$  NMR (400 MHz, Chloroform-*d*)  $\delta$  7.37 – 7.10 (m, 7H), 6.85 (d,  $J$  = 8.7 Hz, 2H), 4.60 (q,  $J$  = 7.1 Hz, 1H), 3.79 (s, 3H), 3.66 (d,  $J$  = 9.8 Hz, 2H), 1.78 (q,  $J$  = 7.5 Hz, 2H), 1.73 – 1.63 (m, 4H), 1.50 – 1.40 (m, 6H), 1.18 – 1.05 (m, 4H), 0.81 (t,  $J$  = 7.3 Hz, 6H), 0.72 (t,  $J$  = 7.5 Hz, 3H).  $^{13}\text{C}$  NMR (101 MHz, Chloroform-*d*)  $\delta$  169.0, 157.9, 146.9, 139.5, 135.6, 128.5, 128.3, 128.2, 128.2, 125.8, 113.5, 88.6, 55.2, 40.6, 37.3, 36.1, 28.0, 16.9, 16.6, 14.5, 14.1, 7.8. HRMS (ESI) Calculated for  $\text{C}_{29}\text{H}_{40}\text{O}_3$   $[\text{M}+\text{K}]^+$ : 475.2609, found: 475.2599. IR  $\nu$  (neat,  $\text{cm}^{-1}$ ): 2960, 2933, 2874, 1702, 1510, 1455, 1281, 1247, 1217, 1179, 1123, 1076, 808. HPLC analysis CHIRALCEL<sup>®</sup> two AD-H columns, n-hexane/iso-propanol = 99.0/1.0, flow rate 0.5 mL/min, 254 nm UV detector,  $t_{\text{R}}$  (minor)



= 109.672 min,  $t_R$  (major) = 96.385 min.  $[\alpha]_D^{25} = -27$  (c = 0.3, CH<sub>2</sub>Cl<sub>2</sub>); 92% ee

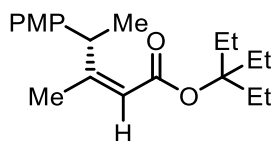

*3-ethylpentan-3-yl (R,Z)-4-(4-methoxyphenyl)-3-methylpent-2-enoate (5e)*. The reaction was carried out according to the general procedure B on 0.1 mmol scale (36 h); purified by flash column chromatography on SiO<sub>2</sub> (eluent: petroleum ether/ethyl acetate) to afford **5e**, 21.9 mg, 69%, light yellow oil; R<sub>f</sub> = 0.8 (petroleum ether/ethyl acetate 10:1). <sup>1</sup>H NMR (400 MHz, Chloroform-*d*) δ 7.19 (dd, *J* = 8.9, 0.7 Hz, 2H), 6.83 (d, *J* = 8.8 Hz, 2H), 5.63 (d, *J* = 1.3 Hz, 1H), 5.24 (q, *J* = 7.2 Hz, 1H), 3.78 (s, 3H), 1.88 (q, *J* = 7.5 Hz, 6H), 1.57 (d, *J* = 1.3 Hz, 3H), 1.39 (d, *J* = 7.1 Hz, 3H), 0.85 (t, *J* = 7.5 Hz, 9H). <sup>13</sup>C NMR (101 MHz, Chloroform-*d*) δ 165.78, 160.6, 157.9, 135.3, 128.4, 117.7, 113.5, 87.9, 55.2, 37.5, 26.9, 19.5, 17.0, 7.7. HRMS (ESI) Calculated for C<sub>20</sub>H<sub>30</sub>O<sub>3</sub> [M+Na]<sup>+</sup>: 341.2087, found: 341.2072. IR ν (neat, cm<sup>-1</sup>): 2969, 2942, 1703, 1639, 1510, 1457, 1247, 1222, 1130, 1040, 832. HPLC analysis CHIRALCEL<sup>®</sup> two AD-H columns, n-hexane/iso-propanol = 99.0/1.0, flow rate 0.5 mL/min, 254 nm UV detector,  $t_R$  (minor) = 23.898 min,  $t_R$  (major) = 25.037 min.  $[\alpha]_D^{25} = -23$  (c = 0.2, CH<sub>2</sub>Cl<sub>2</sub>); 85% ee

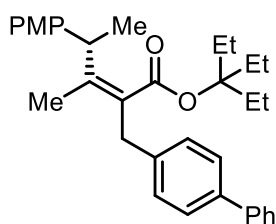

*3-ethylpentan-3-yl (S,Z)-2-([1,1'-biphenyl]-4-ylmethyl)-4-(4-methoxyphenyl)-3-methylpent-2-enoate (5f)*. The reaction was carried out according to the general procedure B on 0.1 mmol scale (36 h); purified by flash column chromatography on SiO<sub>2</sub> (eluent: petroleum ether/ethyl acetate) to afford **5f**, 30.1 mg, 62%, light yellow oil; R<sub>f</sub> = 0.8 (petroleum ether/ethyl acetate 10:1). <sup>1</sup>H NMR (400 MHz, Chloroform-*d*) δ 7.60 – 7.54 (m, 2H), 7.51 – 7.46 (m, 2H), 7.42 (dd, *J* = 8.4, 6.9 Hz, 2H), 7.34 – 7.23 (m, 5H), 6.89 – 6.82 (m, 2H), 4.64 (q, *J* = 7.0 Hz, 1H), 3.79 (s, 3H), 3.71 (d, *J* = 9.2 Hz, 2H), 1.80 (q, *J* = 7.5 Hz, 6H), 1.48 (s, 3H), 1.45 (d, *J* = 7.0 Hz, 3H), 0.73 (t, *J* = 7.5 Hz, 9H). <sup>13</sup>C NMR (101 MHz, Chloroform-*d*) δ 169.0, 157.9, 147.2, 141.2, 138.8, 135.6, 128.7, 128.6, 128.5, 128.2, 127.0, 127.0, 113.5, 89.1, 55.2, 40.6, 35.8, 26.9, 17.0, 14.2, 7.6. HRMS (ESI) Calculated for C<sub>33</sub>H<sub>40</sub>O<sub>3</sub> [M+K]<sup>+</sup>: 523.2609, found: 523.2605. IR ν (neat, cm<sup>-1</sup>): 2969, 2938, 1702, 1510, 1457, 1285, 1247, 1179, 1072, 832, 758, 698. HPLC analysis CHIRALCEL<sup>®</sup> two AD-H columns, n-hexane/iso-propanol = 98.5/1.5, flow rate 0.5 mL/min, 254 nm UV detector,  $t_R$  (minor) = 31.609 min,  $t_R$  (major) = 27.815 min.  $[\alpha]_D^{25} = -11$  (c = 1.0, CH<sub>2</sub>Cl<sub>2</sub>); 91% ee

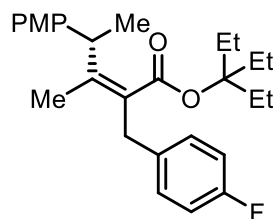

*3-ethylpentan-3-yl (S,Z)-2-(4-fluorobenzyl)-4-(4-methoxyphenyl)-3-methylpent-2-enoate (5g)*. The reaction was carried out according to the general procedure B on 0.1 mmol scale (36 h); purified by flash column chromatography on SiO<sub>2</sub> (eluent: petroleum ether/ethyl acetate) to afford **5g**, 29.9 mg, 70%, light yellow oil; R<sub>f</sub> = 0.8 (petroleum ether/ethyl acetate 10:1). <sup>1</sup>H NMR (400 MHz, Chloroform-*d*) δ 7.23 (d, *J* = 8.1 Hz, 2H), 7.15 – 7.11 (m, 2H), 6.94 (t, *J* = 8.8 Hz, 2H), 6.85 (d, *J* = 8.9 Hz, 2H), 4.61 (q, *J* = 7.0 Hz, 1H), 3.79 (s, 3H), 3.68 – 3.58 (m, 2H), 1.79 (q, *J* = 7.5 Hz, 6H), 1.45 – 1.42 (m, 6H), 0.72 (t, *J* = 7.5 Hz, 9H). <sup>19</sup>F NMR (376 MHz, Chloroform-*d*) δ -117.80. <sup>13</sup>C NMR (101 MHz, Chloroform-*d*) δ 168.8, 161.3 (d, *J* = 243.4 Hz), 157.9, 147.3, 135.4, 135.2 (d, *J* = 3.2 Hz), 129.4 (d, *J* = 7.7 Hz), 128.4, 128.1, 115.0 (d, *J* = 21.3 Hz), 113.5, 89.2, 55.2, 40.6, 35.3, 26.9, 16.9, 14.1, 7.6. HRMS (ESI) Calculated for C<sub>27</sub>H<sub>35</sub>FO<sub>3</sub> [M+Na]<sup>+</sup>: 449.2462, found: 449.2453. IR ν (neat, cm<sup>-1</sup>): 2970, 2939, 1702, 1509, 1458, 1285, 1247, 1221, 1179, 1040, 832. HPLC analysis CHIRALCEL<sup>®</sup> two AD-H columns, n-hexane/iso-propanol = 98.5/1.5, flow rate 0.5 mL/min, 254 nm UV detector, *t*<sub>R</sub> (minor) = 22.312 min, *t*<sub>R</sub> (major) = 23.787 min. [α]<sub>D</sub><sup>25</sup> = -13 (c = 0.6, CH<sub>2</sub>Cl<sub>2</sub>); 86% ee

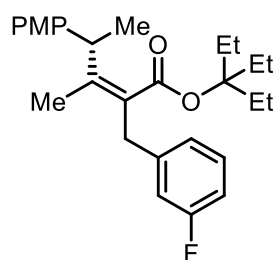

*3-ethylpentan-3-yl (Z)-2-(3-fluorobenzyl)-4-(4-methoxyphenyl)-3-methylpent-2-enoate (5h)*. The reaction was carried out according to the general procedure B on 0.1 mmol scale (36 h); purified by flash column chromatography on SiO<sub>2</sub> (eluent: petroleum ether/ethyl acetate) to afford **5h**, 26.0 mg, 61%, light yellow oil; R<sub>f</sub> = 0.8 (petroleum ether/ethyl acetate 10:1). <sup>1</sup>H NMR (400 MHz, Chloroform-*d*) δ 7.28 – 7.16 (m, 3H), 7.02 – 6.94 (m, 1H), 6.94 – 6.82 (m, 4H), 4.65 (q, *J* = 7.1 Hz, 1H), 3.79 (s, 3H), 3.66 (d, *J* = 7.7 Hz, 2H), 1.79 (q, *J* = 7.5 Hz, 6H), 1.44 (d, *J* = 7.2 Hz, 6H), 0.73 (t, *J* = 7.5 Hz, 9H). <sup>19</sup>F NMR (376 MHz, Chloroform-*d*) δ -113.95. <sup>13</sup>C NMR (101 MHz, Chloroform-*d*) δ 168.7, 163.0 (d, *J* = 244.8 Hz), 157.9, 148.1, 142.3 (d, *J* = 6.8 Hz), 135.4, 129.6 (d, *J* = 8.2 Hz), 128.4, 127.5, 123.8 (d, *J* = 2.7 Hz), 114.9 (d, *J* = 21.3 Hz), 113.6, 112.7 (d, *J* = 21.3 Hz), 89.3, 55.2, 40.6, 35.8, 35.8, 26.9, 16.9, 14.2, 7.6. HRMS (ESI) Calculated for C<sub>27</sub>H<sub>35</sub>FO<sub>3</sub> [M+K]<sup>+</sup>: 465.2202, found: 465.2193. IR ν (neat, cm<sup>-1</sup>): 2969, 2940, 1702, 1613, 1510, 1454, 1284, 1246, 1178, 1133, 1073, 1038, 776. HPLC analysis CHIRALCEL<sup>®</sup> two AD-H columns, n-hexane/iso-propanol = 98.5/1.5, flow rate 0.5 mL/min, 254 nm UV detector, *t*<sub>R</sub> (minor) = 23.029 min, *t*<sub>R</sub> (major) = 24.539 min. [α]<sub>D</sub><sup>25</sup> = -15 (c = 0.6, CH<sub>2</sub>Cl<sub>2</sub>); 90% ee

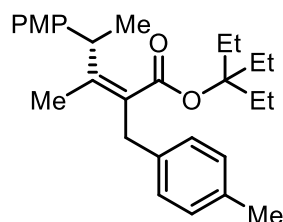

*3-ethylpentan-3-yl (S,Z)-4-(4-methoxyphenyl)-3-methyl-2-(4-methylbenzyl)pent-2-enoate (5i).*

The reaction was carried out according to the general procedure B on 0.1 mmol scale (36 h); purified by flash column chromatography on SiO<sub>2</sub> (eluent: petroleum ether/ethyl acetate) to afford **5i**, 28.8 mg, 68%, light yellow oil; R<sub>f</sub> = 0.8 (petroleum ether/ethyl acetate 10:1). <sup>1</sup>H NMR (400 MHz, Chloroform-*d*) δ 7.25 – 7.23 (m, 2H), 7.08 – 7.04 (m, 4H), 6.85 (d, *J* = 8.8 Hz, 2H), 4.59 (q, *J* = 7.0 Hz, 1H), 3.79 (s, 3H), 3.63 (d, *J* = 10.0 Hz, 2H), 2.29 (s, 3H), 1.79 (t, *J* = 7.5 Hz, 6H), 1.42 (d, *J* = 7.3 Hz, 6H), 0.73 (t, *J* = 7.5 Hz, 9H). <sup>13</sup>C NMR (101 MHz, Chloroform-*d*) δ 169.1, 157.8, 146.8, 136.4, 135.6, 135.2, 128.9, 128.5, 128.0, 113.5, 89.0, 55.2, 40.6, 35.6, 26.9, 21.0, 16.9, 14.1, 7.6. HRMS (ESI) Calculated for C<sub>28</sub>H<sub>38</sub>O<sub>3</sub> [M+K]<sup>+</sup>: 461.2453, found: 461.2444. IR ν (neat, cm<sup>-1</sup>): 2969, 2941, 1702, 1511, 1284, 1248, 1179, 1040, 832. HPLC analysis CHIRALCEL<sup>®</sup> two AD-H columns, n-hexane/iso-propanol = 98.5/1.5, flow rate 0.5 mL/min, 254 nm UV detector, *t*<sub>R</sub> (minor) = 22.294 min, *t*<sub>R</sub> (major) = 23.385 min. [α]<sub>D</sub><sup>25</sup> = -16 (c = 0.5, CH<sub>2</sub>Cl<sub>2</sub>); 91% ee

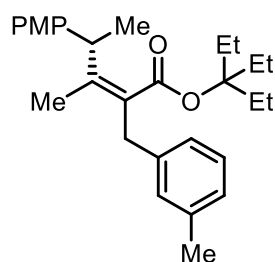

*3-ethylpentan-3-yl (S,Z)-4-(4-methoxyphenyl)-3-methyl-2-(3-methylbenzyl)pent-2-enoate (5j).*

The reaction was carried out according to the general procedure B on 0.1 mmol scale (36 h); purified by flash column chromatography on SiO<sub>2</sub> (eluent: petroleum ether/ethyl acetate) to afford **5j**, 30.5 mg, 72%, light yellow oil; R<sub>f</sub> = 0.8 (petroleum ether/ethyl acetate 10:1). <sup>1</sup>H NMR (400 MHz, Chloroform-*d*) δ 7.26 – 7.24 (m, 2H), 7.13 (t, *J* = 7.5 Hz, 1H), 7.00 – 6.94 (m, 3H), 6.85 (d, *J* = 8.8 Hz, 2H), 4.62 (q, *J* = 7.1 Hz, 1H), 3.79 (s, 3H), 3.69 – 3.58 (m, 2H), 2.30 (s, 3H), 1.79 (q, *J* = 7.6 Hz, 6H), 1.44 – 1.42 (m, 6H), 0.73 (t, *J* = 7.5 Hz, 9H). <sup>13</sup>C NMR (101 MHz, Chloroform-*d*) δ 169.0, 157.8, 146.9, 139.5, 137.6, 135.6, 129.0, 128.5, 128.3, 128.1, 126.5, 125.2, 113.5, 89.0, 55.2, 40.6, 35.9, 26.9, 21.4, 16.9, 14.1, 7.6. HRMS (ESI) Calculated for C<sub>28</sub>H<sub>38</sub>O<sub>3</sub> [M+K]<sup>+</sup>: 461.2453, found: 461.2445. IR ν (neat, cm<sup>-1</sup>): 2969, 2939, 1702, 1510, 1457, 1284, 1217, 1135, 1072, 832. HPLC analysis CHIRALCEL<sup>®</sup> two AD-H columns, n-hexane/iso-propanol = 98.5/1.5, flow rate 0.5 mL/min, 254 nm UV detector, *t*<sub>R</sub> (minor) = 21.487 min, *t*<sub>R</sub> (major) = 22.989 min. [α]<sub>D</sub><sup>25</sup> = -13 (c = 0.7, CH<sub>2</sub>Cl<sub>2</sub>); 92% ee

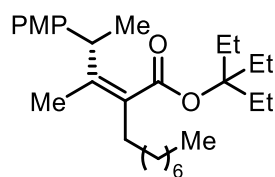

*3-ethylpentan-3-yl (S,Z)-2-(3-(4-methoxyphenyl)butan-2-ylidene)decanoate (5k)*. The reaction was carried out according to the general procedure B on 0.1 mmol scale (36 h); purified by flash column chromatography on SiO<sub>2</sub> (eluent: petroleum ether/ethyl acetate) to afford **5k**, 21.6 mg, 50%, light yellow oil; R<sub>f</sub> = 0.8 (petroleum ether/ethyl acetate 10:1). <sup>1</sup>H NMR (400 MHz, Chloroform-*d*) δ 7.21 – 7.19 (m, 2H), 6.83 (d, *J* = 8.8 Hz, 2H), 4.35 (q, *J* = 7.1 Hz, 1H), 3.78 (s, 3H), 2.30 – 2.18 (m, 2H), 1.89 (t, *J* = 7.5 Hz, 6H), 1.45 – 1.26 (m, 18H), 0.89 – 0.84 (m, 12H). <sup>13</sup>C NMR (101 MHz, Chloroform-*d*) δ 170.0, 157.7, 143.0, 135.8, 130.5, 128.4, 113.4, 88.7, 55.2, 40.7, 31.8, 30.6, 29.6, 29.4, 29.3, 28.8, 27.0, 22.7, 16.9, 14.1, 13.1, 7.8. HRMS (ESI) Calculated for C<sub>28</sub>H<sub>46</sub>O<sub>3</sub> [M+K]<sup>+</sup>: 469.3079, found: 469.3069. IR ν (neat, cm<sup>-1</sup>): 2965, 2925, 1703, 1510, 1458, 1282, 1178, 1116, 1038, 832. HPLC analysis CHIRALCEL<sup>®</sup> two AD-H columns, n-hexane/iso-propanol = 99.0/1.0, flow rate 0.5 mL/min, 254 nm UV detector, *t*<sub>R</sub> (minor) = 65.871 min, *t*<sub>R</sub> (major) = 44.660 min. [α]<sub>D</sub><sup>25</sup> = -13 (c = 0.5, CH<sub>2</sub>Cl<sub>2</sub>); 90% ee

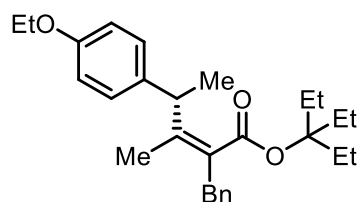

*3-ethylpentan-3-yl (S,Z)-2-benzyl-4-(4-ethoxyphenyl)-3-methylpent-2-enoate (5l)*. The reaction was carried out according to the general procedure B on 0.1 mmol scale (36 h); purified by flash column chromatography on SiO<sub>2</sub> (eluent: petroleum ether/ethyl acetate) to afford **5l**, 27.5 mg, 65%, light yellow oil; R<sub>f</sub> = 0.8 (petroleum ether/ethyl acetate 10:1). <sup>1</sup>H NMR (400 MHz, Chloroform-*d*) δ 7.27 – 7.13 (m, 7H), 6.86 – 6.82 (m, 2H), 4.62 (q, *J* = 7.1 Hz, 1H), 4.02 (q, *J* = 7.0 Hz, 2H), 3.72 – 3.62 (m, 2H), 1.78 (q, *J* = 7.5 Hz, 6H), 1.45 – 1.38 (m, 9H), 0.71 (t, *J* = 7.5 Hz, 9H). <sup>13</sup>C NMR (101 MHz, Chloroform-*d*) δ 169.0, 157.2, 147.2, 139.6, 135.4, 128.4, 128.2, 128.2, 128.1, 125.8, 114.1, 89.0, 63.3, 40.6, 36.1, 26.9, 16.9, 14.9, 14.2, 7.6. HRMS (ESI) Calculated for C<sub>28</sub>H<sub>38</sub>O<sub>3</sub> [M+K]<sup>+</sup>: 461.2453, found: 461.2442. IR ν (neat, cm<sup>-1</sup>): 2971, 2937, 1703, 1510, 1454, 1282, 1245, 1220, 1135, 1074, 835, 737. HPLC analysis CHIRALCEL<sup>®</sup> two AD-H columns, n-hexane/iso-propanol = 99.0/1.0, flow rate 0.5 mL/min, 254 nm UV detector, *t*<sub>R</sub> (minor) = 26.749 min, *t*<sub>R</sub> (major) = 24.300 min. [α]<sub>D</sub><sup>25</sup> = -17 (c = 0.4, CH<sub>2</sub>Cl<sub>2</sub>); 88% ee

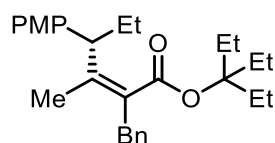

*3-ethylpentan-3-yl (S,Z)-2-benzyl-4-(4-methoxyphenyl)-3-methylhex-2-enoate (5m)*. The reaction was carried out according to the general procedure B on 0.1 mmol scale (36 h); purified by flash column chromatography on SiO<sub>2</sub> (eluent: petroleum ether/ethyl acetate) to afford **5m**,

24.1 mg, 57%, light yellow oil;  $R_f = 0.8$  (petroleum ether/ethyl acetate 10:1).  $^1\text{H NMR}$  (400 MHz, Chloroform- $d$ )  $\delta$  7.32 – 7.29 (m, 2H), 7.25 – 7.12 (m, 5H), 6.87 – 6.83 (m, 2H), 4.39 (dd,  $J = 9.1, 6.4$  Hz, 1H), 3.79 (s, 3H), 3.68 (d,  $J = 6.5$  Hz, 2H), 1.97 – 1.87 (m, 1H), 1.82 – 1.77 (m, 7H), 1.45 (s, 3H), 0.96 (t,  $J = 7.4$  Hz, 3H), 0.73 (t,  $J = 7.5$  Hz, 9H).  $^{13}\text{C NMR}$  (101 MHz, Chloroform- $d$ )  $\delta$  169.1, 157.8, 145.5, 139.7, 134.8, 129.4, 128.9, 128.2, 125.8, 113.5, 89.1, 55.2, 47.8, 36.3, 27.0, 23.7, 13.8, 12.2, 7.7. HRMS (ESI) Calculated for  $\text{C}_{28}\text{H}_{38}\text{O}_3$   $[\text{M}+\text{K}]^+$ : 461.2453, found: 461.2448. IR  $\nu$  (neat,  $\text{cm}^{-1}$ ): 2966, 2934, 1701, 1510, 1454, 1245, 1210, 1178, 1134, 1088, 866, 732. HPLC analysis CHIRALCEL<sup>®</sup> two AD-H columns, n-hexane/iso-propanol = 99.0/1.0, flow rate 0.5 mL/min, 254 nm UV detector,  $t_R$  (minor) = 24.495 min,  $t_R$  (major) = 26.007 min.  $[\alpha]_D^{25} = -18$  ( $c = 0.5, \text{CH}_2\text{Cl}_2$ ); 90% ee

## 5. Investigation of the reaction mechanism

### 5.1 Radical inhibition experiments with TEMPO

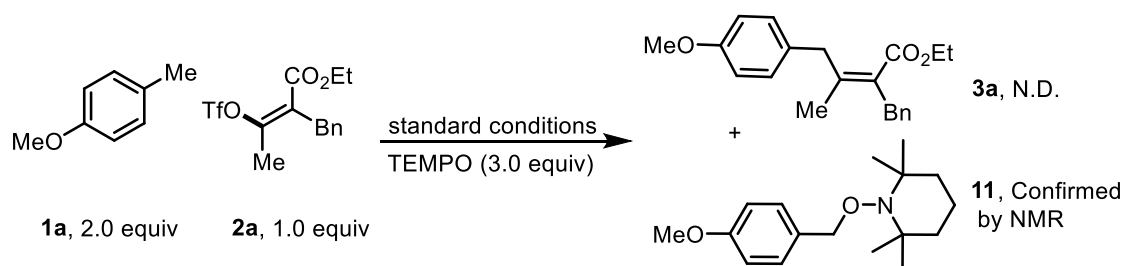

The reaction was completely inhibited by TEMPO. The isolated compound **11** indicated that the reaction probably proceeded via a radical process.

### 5.2 Byproducts detected experiments

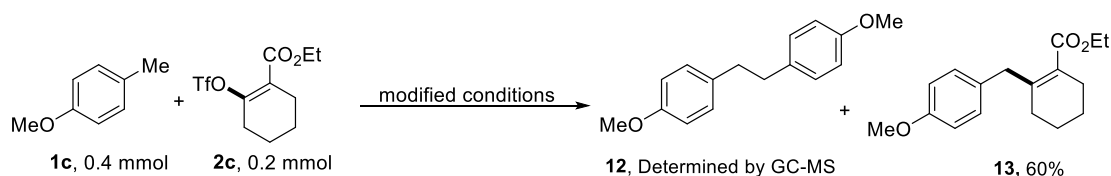

Modified conditions: Photocatalyst  $[\text{Ir}(\text{dF}(\text{CF}_3)\text{ppy})_2(5,5'\text{-dFbpy})]\text{PF}_6$  (4.2 mg, 2 mol%),  $\text{NiCl}_2 \cdot 6\text{H}_2\text{O}$  (4.8 mg, 10 mol%), 4,4'-Di-tert-butyl-2,2'-bipyridine (8.0 mg, 15%) and  $\text{K}_2\text{HPO}_4$  (34.8 mg, 0.2 mmol, 1 equiv) were added to an oven-dried 10 mL Schlenk tube equipped with a magnetic stirring bar. The tube was evacuated and backfilled with argon three times. Subsequently, DMF was added under argon. Benzylic compound (0.4 mmol, 2 equiv), alkenyl triflates (0.2 mmol, 1 equiv) were then added. The tube was then sealed and placed ~5 cm from  $2 \times 45$  W blue LEDs. The reaction mixture was stirred for 24 h at room temperature (air-condition was used to keep the temperature is 25 °C or so). After completion, the reaction

mixture was removed from the light, diluted with water and the aqueous layer was extracted with EtOAc ( $3 \times 2$  mL). The combined organic layers were washed with brine, dried over anhydrous  $\text{Na}_2\text{SO}_4$ , filtered, and concentrated. The residue was purified by flash chromatography on silica gel to afford the corresponding products.

We found the byproduct **12**, which further confirms the existence of the benzyl radical.

### 5.3 Kinetic experiments

#### 5.3.1 The total reaction profile

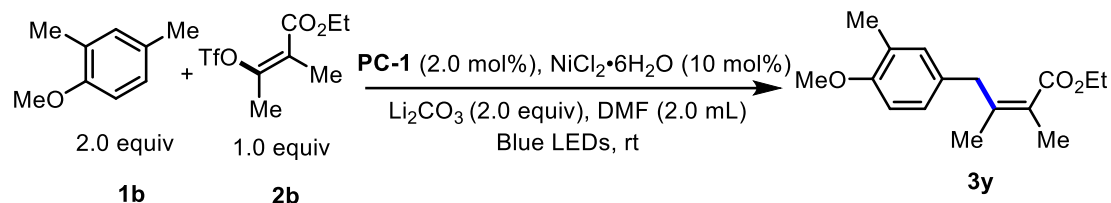

Photocatalyst  $[\text{Ir}(\text{dF}(\text{CF}_3)\text{ppy})_2(4,4'\text{-dCF}_3\text{bpy})]\text{PF}_6$  (4.8 mg, 2 mol%), benzylic compound (0.4 mmol, 2.0 equiv), alkenyl triflates (0.2 mmol, 1.0 equiv),  $\text{NiCl}_2 \cdot 6\text{H}_2\text{O}$  (4.8 mg, 10 mol%), and anhydrous powder  $\text{Li}_2\text{CO}_3$  (29.6 mg, 0.4 mmol, 2.0 equiv) were added to an oven-dried 10 mL Schlenk tube equipped with a magnetic stirring bar. The tube was evacuated and backfilled with argon three times. Subsequently, DMF was added under argon. The tube was then sealed and placed ~5 cm from  $2 \times 45$  W blue LEDs. The reaction mixture was stirred at room temperature (air-condition was used to keep the temperature is 25 °C or so). At 5, 10, 15, 20, 25, 30, 35, 40, 50, 60, 80, 100, 120, 150, 180, 240, 300, 360, 420, 480, 600 min, 20  $\mu\text{L}$  the reaction mixture was carefully taken out by micro-syringe into 2.0 mL vial. Then 1.0 ml EA was added into the vial. The reaction mixture was analyzed by GC-MS after filtration.

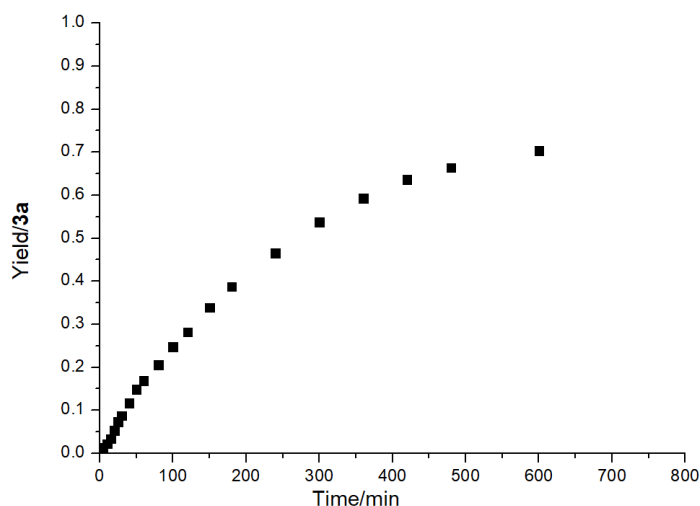

**Supplementary Figure 3.** The total reaction profile

#### 5.3.2 Dependence of the reaction rate on concentration of $\text{NiCl}_2 \cdot 6\text{H}_2\text{O}$

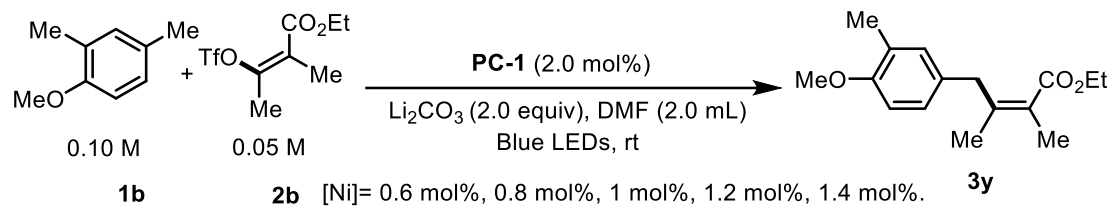

Photocatalyst  $[\text{Ir}(\text{dF}(\text{CF}_3)\text{ppy})_2(4,4'\text{-dCF}_3\text{bpy})]\text{PF}_6$  (4.8 mg, 2 mol%), benzylic compound (0.4 mmol, 2.0 equiv), alkenyl triflates (0.2 mmol, 1.0 equiv),  $\text{NiCl}_2 \cdot 6\text{H}_2\text{O}$  (0.6 mol%, 0.8 mol%, 1.0 mol%, 1.2 mol%, 1.4 mol%), and anhydrous powder  $\text{Li}_2\text{CO}_3$  (29.6 mg, 0.4 mmol, 2.0 equiv) were added to an oven-dried 10 mL Schlenk tube equipped with a magnetic stirring bar. The tube was evacuated and backfilled with argon three times. Subsequently, DMF was added under argon. The tube was then sealed and placed  $\sim 5$  cm from  $2 \times 45$  W blue LEDs. The reaction mixture was stirred for 24 h at room temperature (air-condition was used to keep the temperature is 25 °C or so). At 6, 12, 18, 24, 30, 36, 42, 48, 54, 60 min, 20  $\mu\text{L}$  the reaction mixture was carefully taken out by micro-syringe into 2.0 mL vial. Then 1.0 ml EA was added into the vial. The reaction mixture was analyzed by GC-MS after filtration.

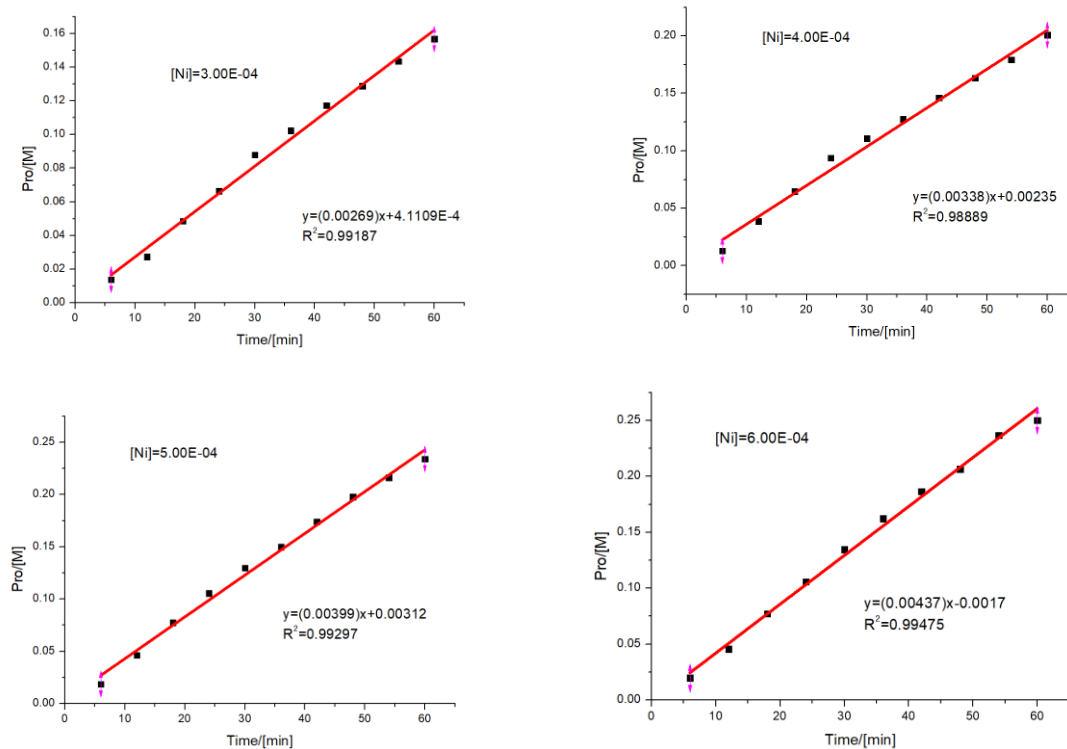

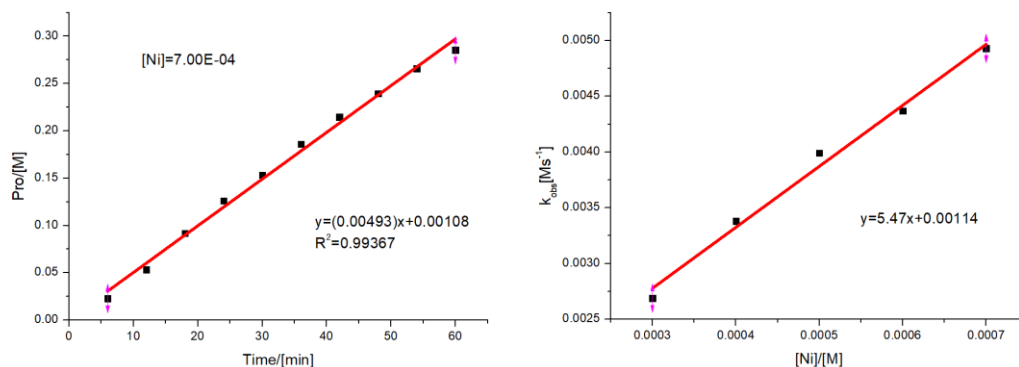

**Supplementary Figure 4.** Dependence of the reaction rate on loading of [Ni]

The plot of  $K_{obs}$  vs [Ni] displayed a linear relationship in [Ni], which should suggest a first-order kinetic dependence in [Ni].

### 5.3.3 Dependence of the reaction rate on concentration of PC-1

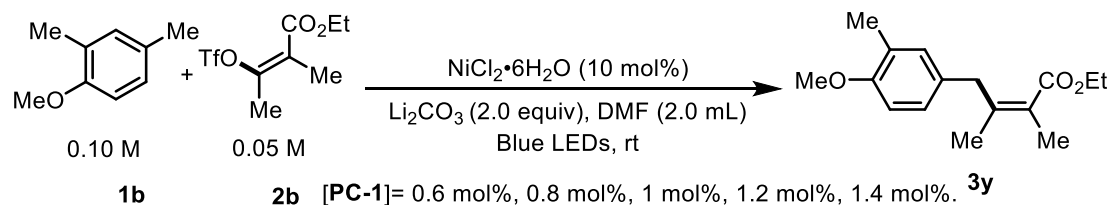

Photocatalyst [Ir(dF(CF<sub>3</sub>)ppy)<sub>2</sub>(4,4'-dCF<sub>3</sub>bpy)]PF<sub>6</sub> (0.6 mol%, 0.8 mol%, 1.0 mol%, 1.2 mol%, 1.4 mol%), benzylic compound (0.4 mmol, 2.0 equiv), alkenyl triflates (0.2 mmol, 1.0 equiv), NiCl<sub>2</sub>·6H<sub>2</sub>O (10 mol%), and anhydrous powder Li<sub>2</sub>CO<sub>3</sub> (29.6 mg, 0.4 mmol, 2.0 equiv) were added to an oven-dried 10 mL Schlenk tube equipped with a magnetic stirring bar. The tube was evacuated and backfilled with argon three times. Subsequently, DMF was added under argon. The tube was then sealed and placed ~5 cm from 2 × 45 W blue LEDs. The reaction mixture was stirred for 24 h at room temperature (air-condition was used to keep the temperature is 25 °C or so). At 6, 12, 18, 24, 30, 36, 42, 48, 54, 60 min, 20 μL the reaction mixture was carefully taken out by micro-syringe into 2.0 mL vial. Then 1.0 ml EA was added into the vial. The reaction mixture was analyzed by GC-MS after filtration.

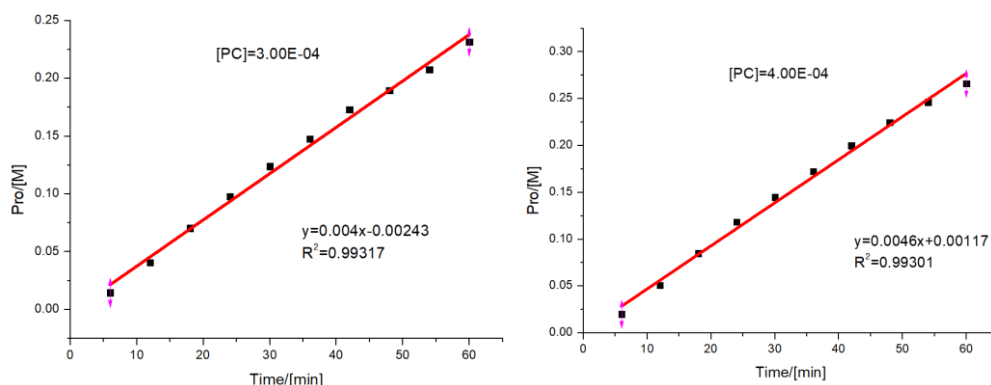



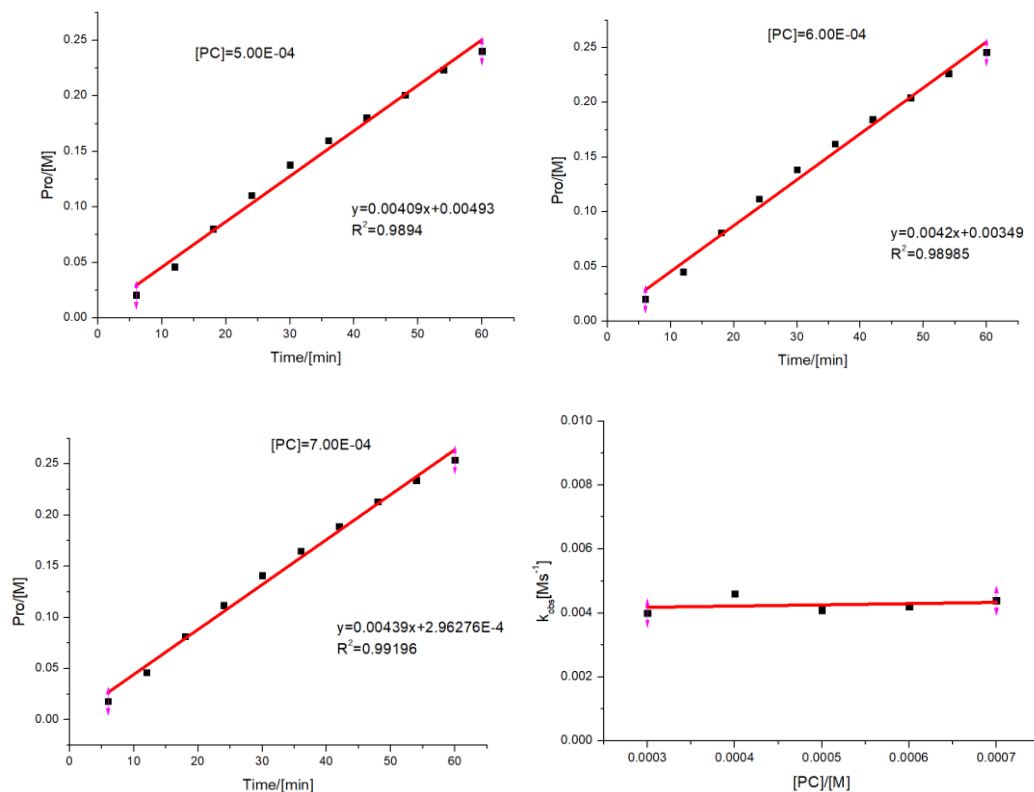

**Supplementary Figure 5.** Dependence of the reaction rate on [PC-1]

The plot of  $k_{obs}$  vs [PC-1] suggests a zero-order kinetic dependence in [PC-1].

#### 5.3.4 Dependence of the reaction rate on concentration of **1b**

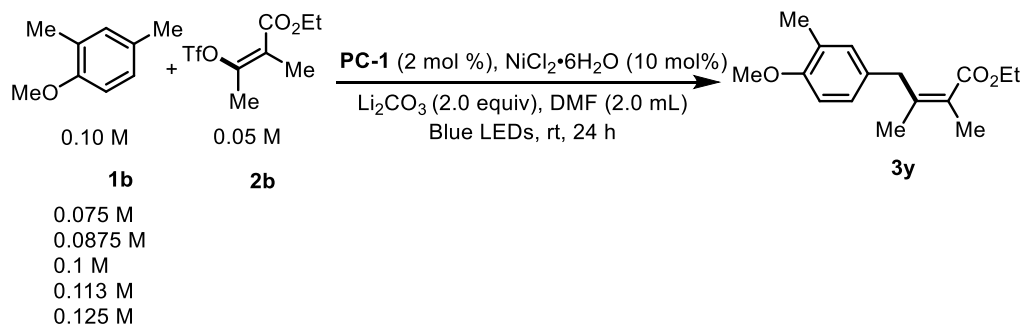

Photocatalyst [Ir(dF(CF<sub>3</sub>)ppy)<sub>2</sub>(4,4'-dCF<sub>3</sub>bpy)]PF<sub>6</sub> (2 mol%), benzylic compound (0.3 mmol, 0.35 mmol, 0.40 mmol, 0.45 mmol, 0.50 mmol), alkenyl triflates (0.2 mmol, 1.0 equiv), NiCl<sub>2</sub>·6H<sub>2</sub>O (10 mol%), and anhydrous powder Li<sub>2</sub>CO<sub>3</sub> (29.6 mg, 0.4 mmol, 2.0 equiv) were added to an oven-dried 10 mL Schlenk tube equipped with a magnetic stirring bar. The tube was evacuated and backfilled with argon three times. Subsequently, DMF was added under argon. The tube was then sealed and placed ~5 cm from 2 × 45 W blue LEDs. The reaction mixture was stirred for 24 h at room temperature (air-condition was used to keep the temperature is 25 °C or so). At 6, 12, 18, 24, 30, 36, 42, 48, 54, 60 min, 20 μL the reaction mixture was carefully taken out by micro-syringe into 2.0 mL vial. Then 1.0 ml EA was added into the vial. The reaction mixture was analyzed by GC-MS after filtration.

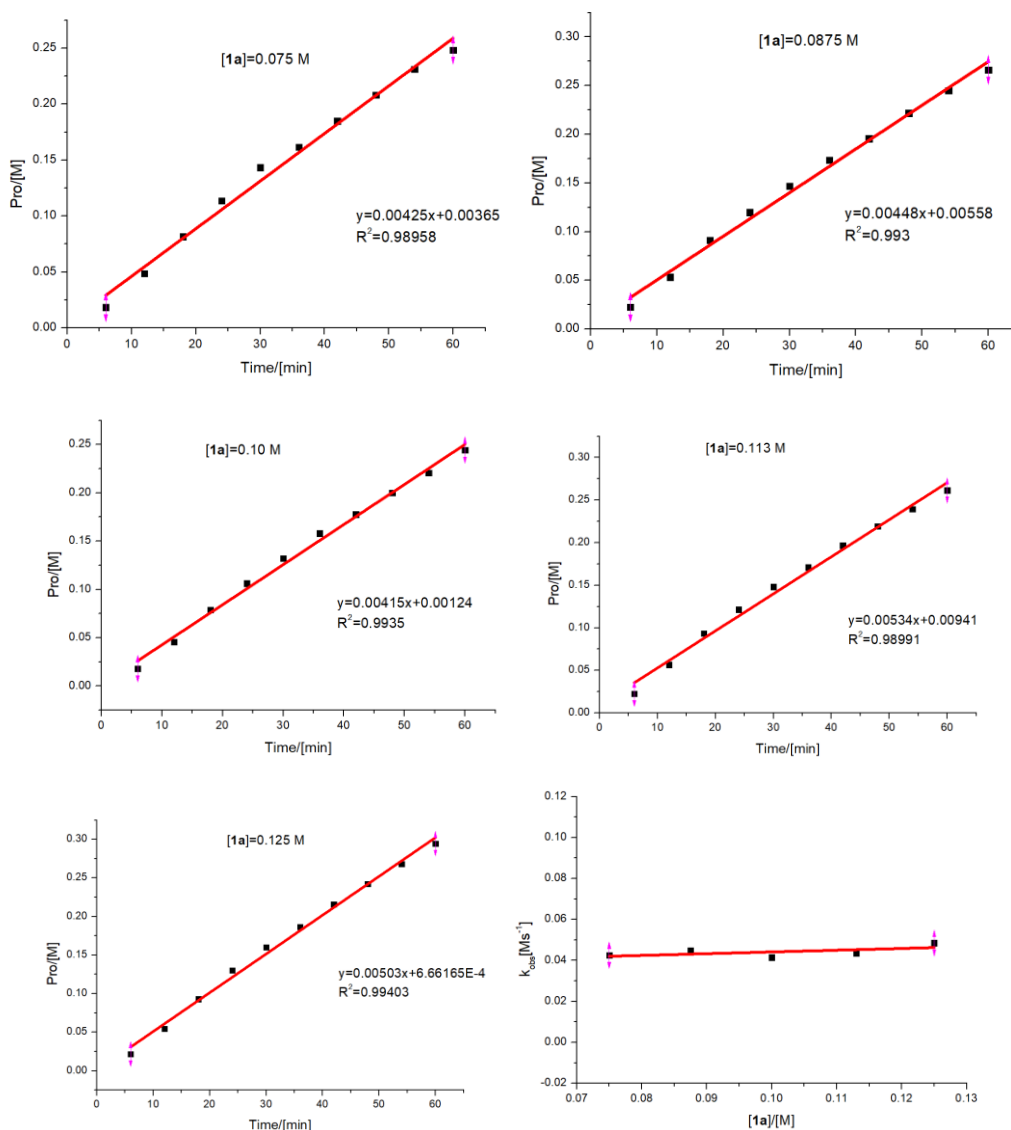

**Supplementary Figure 6.** Dependence of the reaction rate on [**1b**]

The plot of  $k_{obs}$  vs [**1a**] shows the same reaction rate regardless of the initial concentrations of **1a**, which would suggest a zero-order kinetic dependence in [**1b**].

### 5.3.5 Dependence of the reaction rate on concentration of **2b**

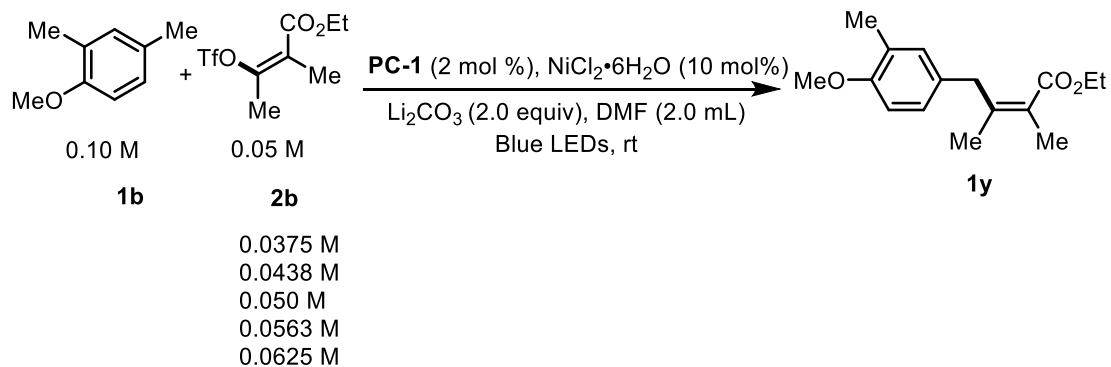

Photocatalyst  $[\text{Ir}(\text{dF}(\text{CF}_3)\text{ppy})_2(4,4'\text{-dCF}_3\text{bpy})]\text{PF}_6$  (2 mol%), benzylic compound (0.4 mmol),

alkenyl triflates (0.15 mmol, 0.175 mmol, 0.20 mmol, 0.225 mmol, 0.25 mmol), NiCl<sub>2</sub>•6H<sub>2</sub>O (10 mol%), and anhydrous powder Li<sub>2</sub>CO<sub>3</sub> (29.6 mg, 0.4 mmol, 2.0 equiv) were added to an oven-dried 10 mL Schlenk tube equipped with a magnetic stirring bar. The tube was evacuated and backfilled with argon three times. Subsequently, DMF was added under argon. The tube was then sealed and placed ~5 cm from 2 × 45 W blue LEDs. The reaction mixture was stirred for 24 h at room temperature (air-condition was used to keep the temperature is 25 °C or so). At 6, 12, 18, 24, 30, 36, 42, 48, 54, 60 min, 20 μL the reaction mixture was carefully taken out by micro-syringe into 2.0 mL vial. Then 1.0 ml EA was added into the vial. The reaction mixture was analyzed by GC-MS after filtration.

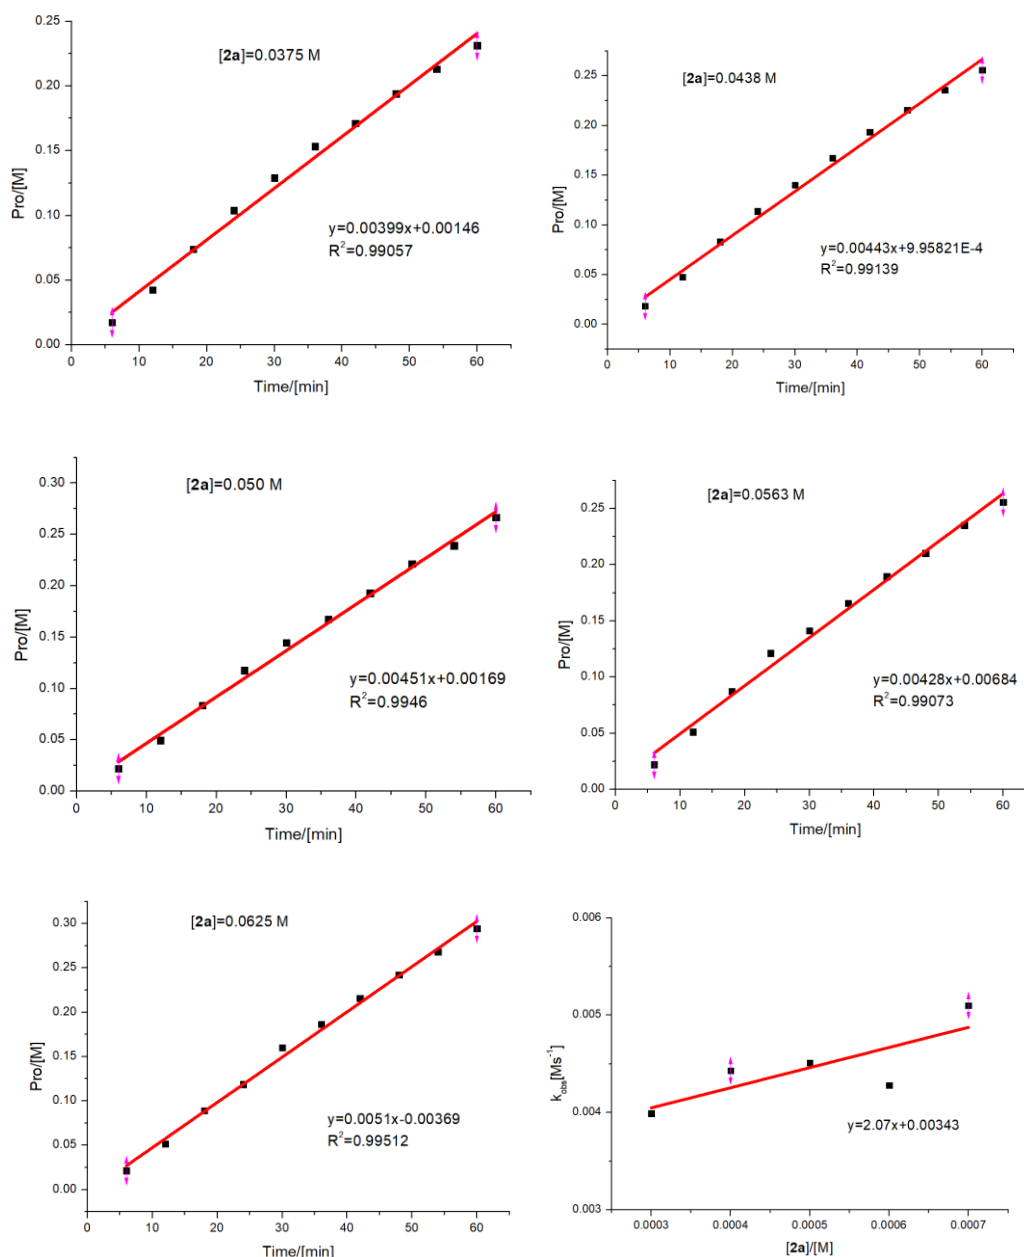

**Supplementary Figure 7.** Dependence of the reaction rate on [2b]

The plot of  $K_{obs}$  vs [2a] suggests a first-order kinetic dependence in [2b].

## 5.4 Luminescence quenching experiment

The luminescence quenching experiment was taken using a F-7000 FL Spectrophotometer (Hitachi, Japan). The experiments were carried out in  $1 \times 10^{-6}$  mol/L of  $[\text{Ir}(\text{dF}(\text{CF}_3)\text{ppy})_2(4,4'\text{-dCF}_3\text{bpy})]\text{PF}_6$  in DMF at 25 °C. The excitation wavelength was 315 nm and the emission intensity was collected at 581 nm. The concentrations of quenchers (**1a** and **2a**) in DMF were 0, 6, 12, 20, 30, 42 mM.

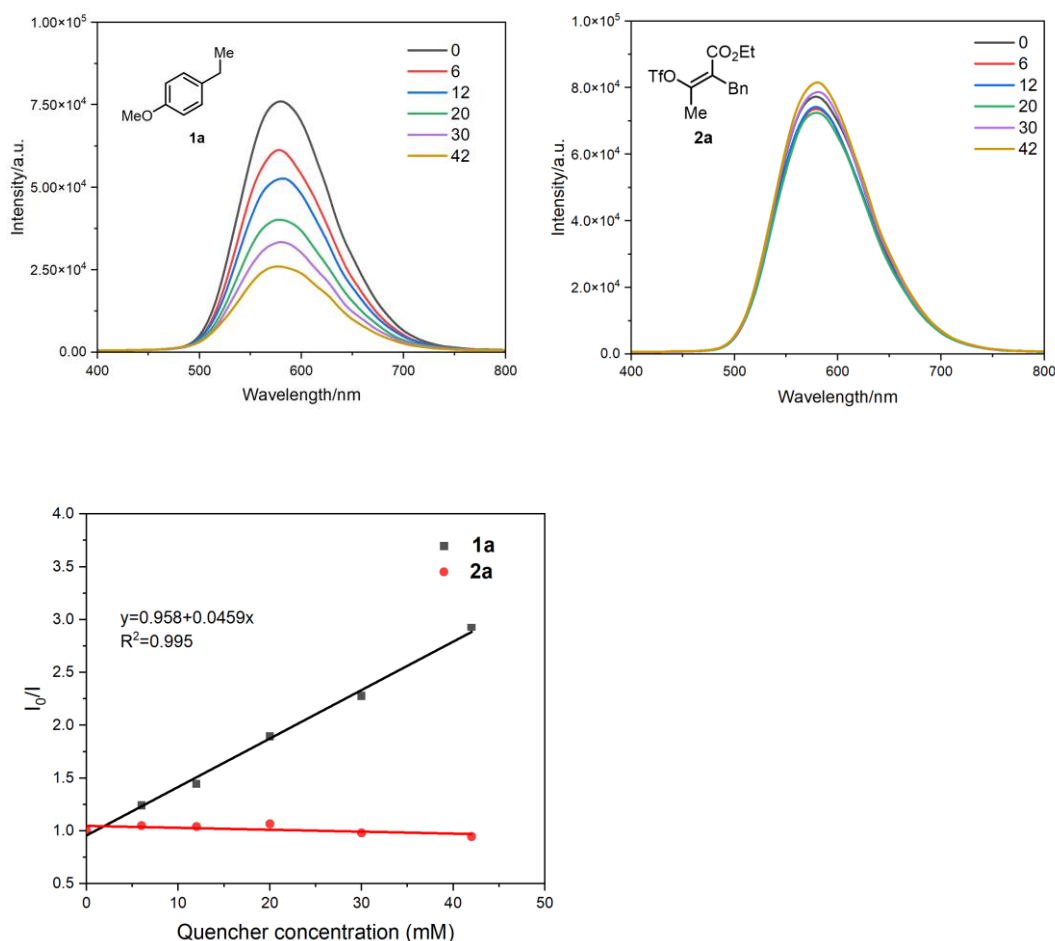

Supplementary Figure 8. The data of fluorescence quenching of  $[\text{Ir}(\text{dF}(\text{CF}_3)\text{ppy})_2(4,4'\text{-dCF}_3\text{bpy})]\text{PF}_6$  by **1a** and **2a**.

To determine whether a reductive or oxidative quenching cycle is operative in the reaction, fluorescence quenching studies were conducted. Based on the above data, photoexcited  $[\text{Ir}(\text{dF}(\text{CF}_3)\text{ppy})_2(4,4'\text{-dCF}_3\text{bpy})]\text{PF}_6^*$  can be quenched by **1a**, involving a reductive quenching cycle.

## 5.5 The reactivity of Z/E vinyl triflates

We have prepared the Z and E vinyl triflate. And we have done the following experiments. (reactions 1-3)

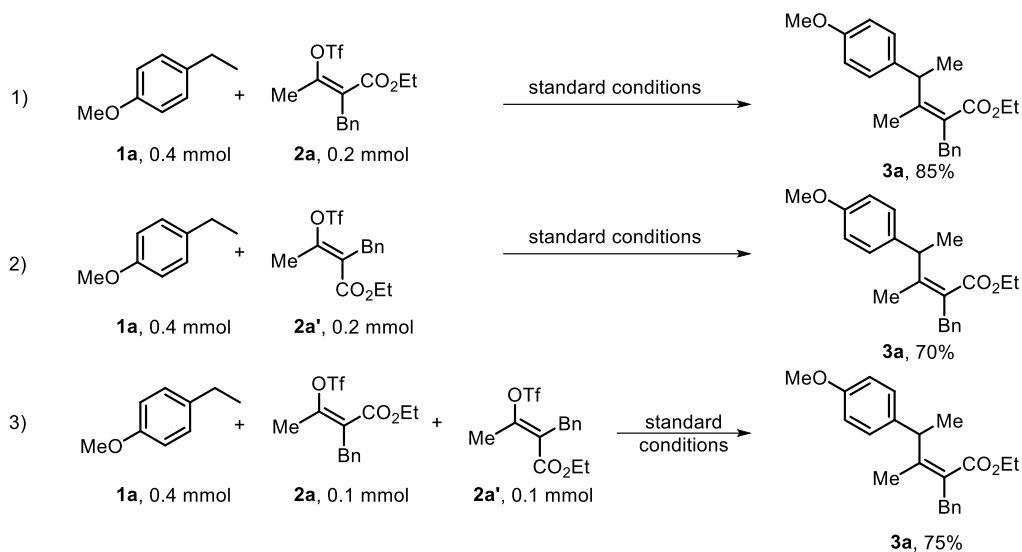

When defined Z, E, or E/Z mixture of the vinyl triflates are treated as substrates, only the Z product is formed in high yields.

For three experiments, the final reaction mixture was first analyzed by GC-MS, proving these reactions produce the same product, without any isomer. Their NMR spectrum are also the same. The NOESY spectrum verified the Z product.

Thus, we speculate that the ester group on the side chain surely plays a role in the stabilization of the transition state with coordination to the nickel center.

### 5.5.1 GC-MS spectrum

For reaction 1, the GC-MS spectrum of the reaction mixture is as follows:

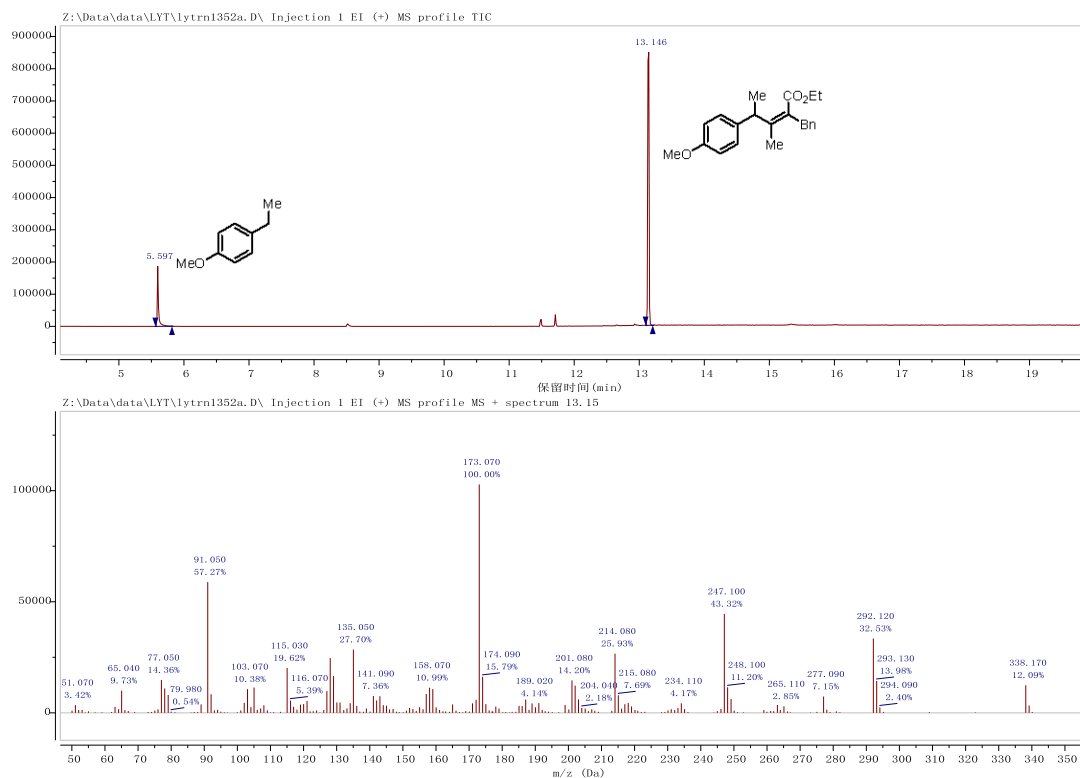

For the reaction 2,

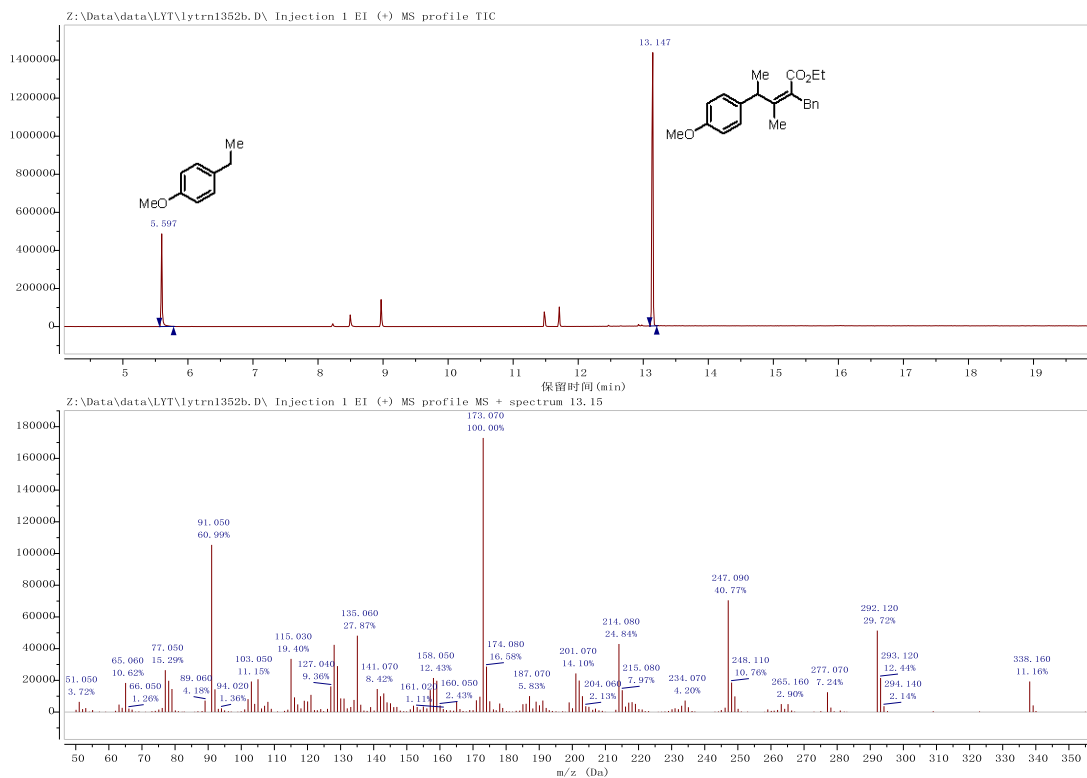

For the reaction 3

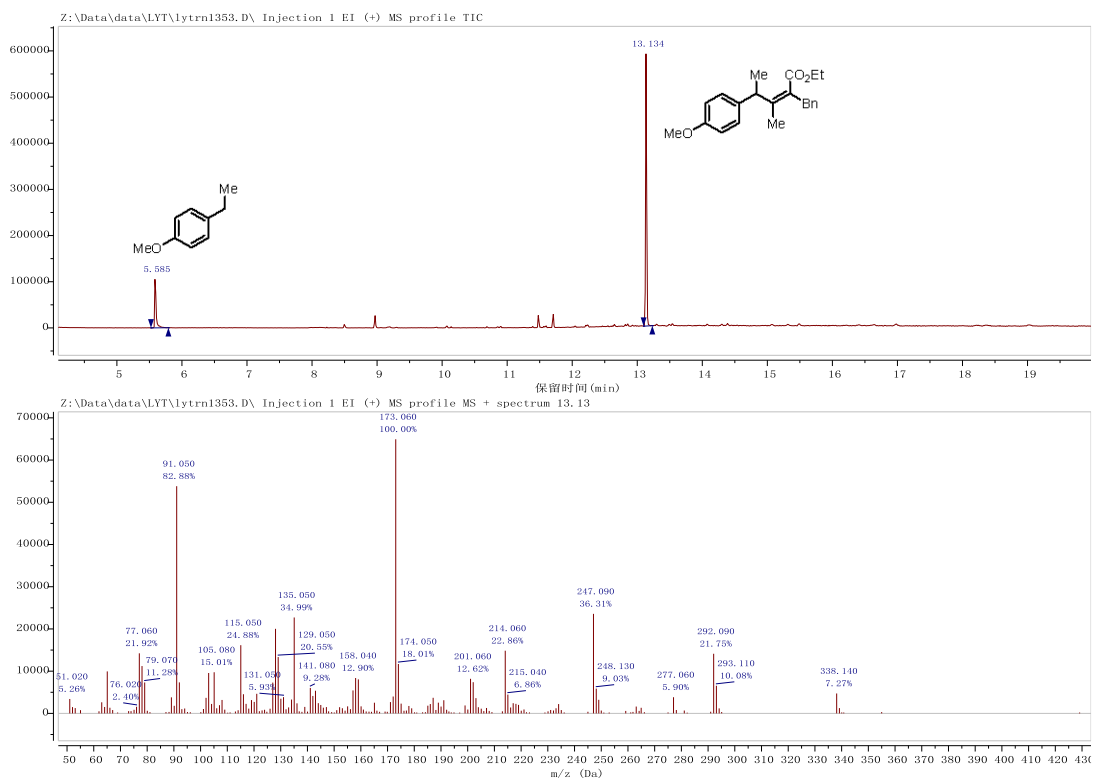

The remain time of the products is nearly the same,  $t=13.146, 13.147, 13.134$ . There are no isomers.

### 5.5.2 NMR analysis.

The comparison of the products' NMR spectrum from reaction 1-3 is as follows.

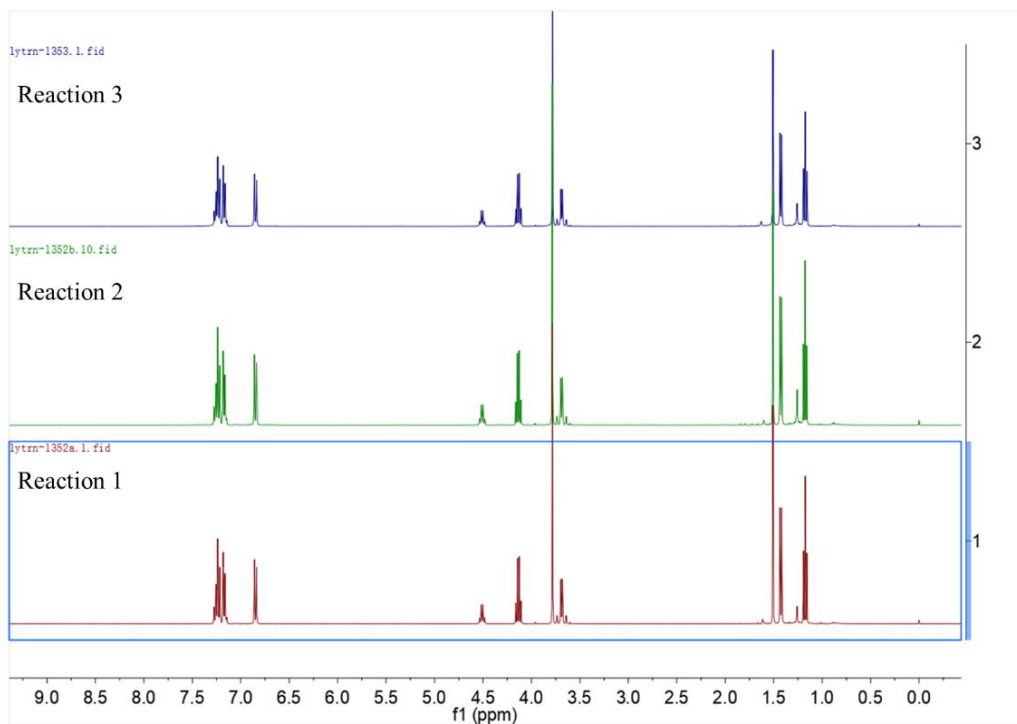

They have the same  $^1\text{H}$  NMR spectrum.

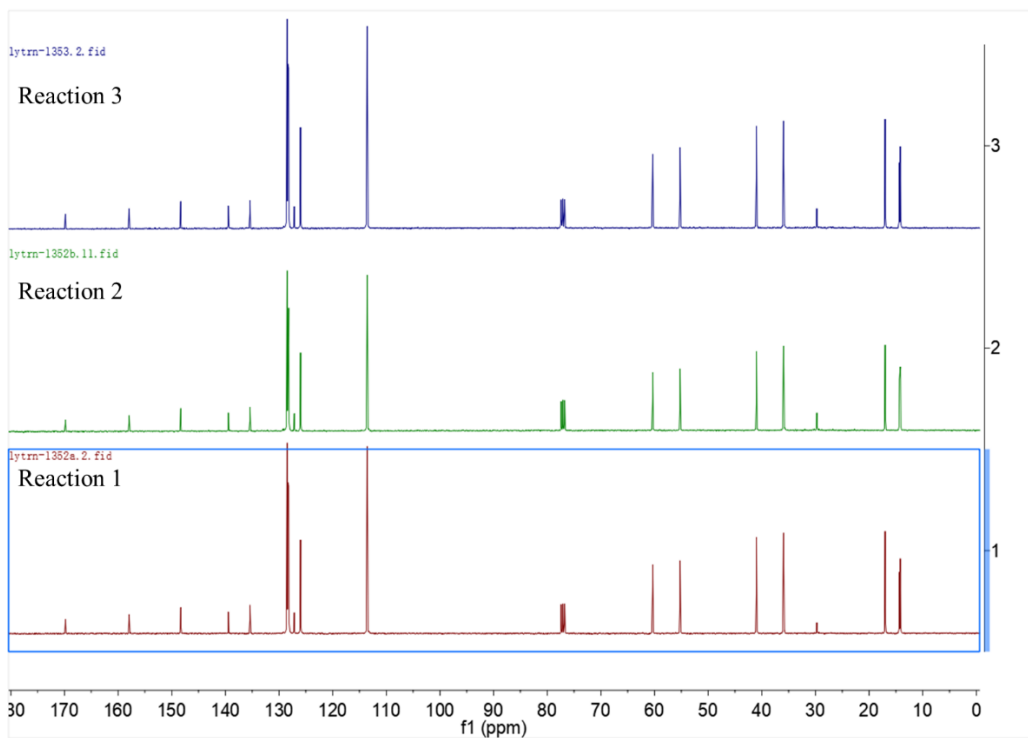

They have the same  $^{13}\text{C}$  NMR spectrum.

H-H NOESY (product of reaction 1):

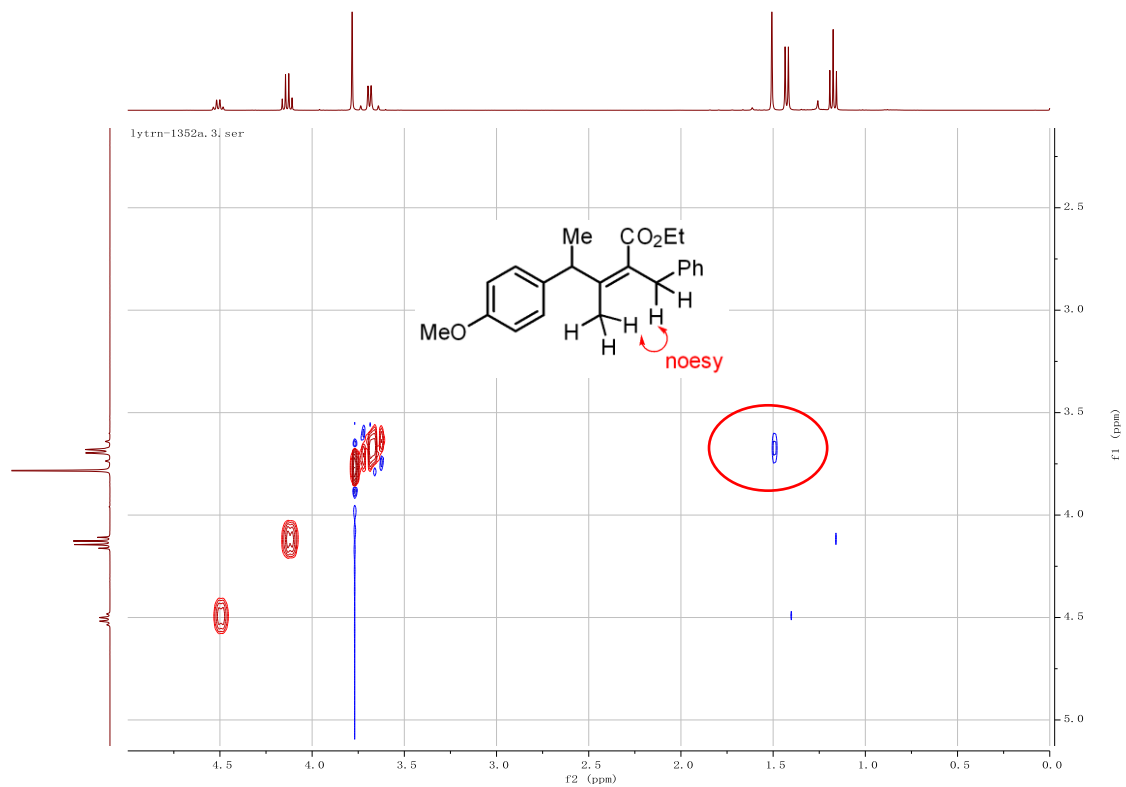

H-H NOESY (product of reaction 2):

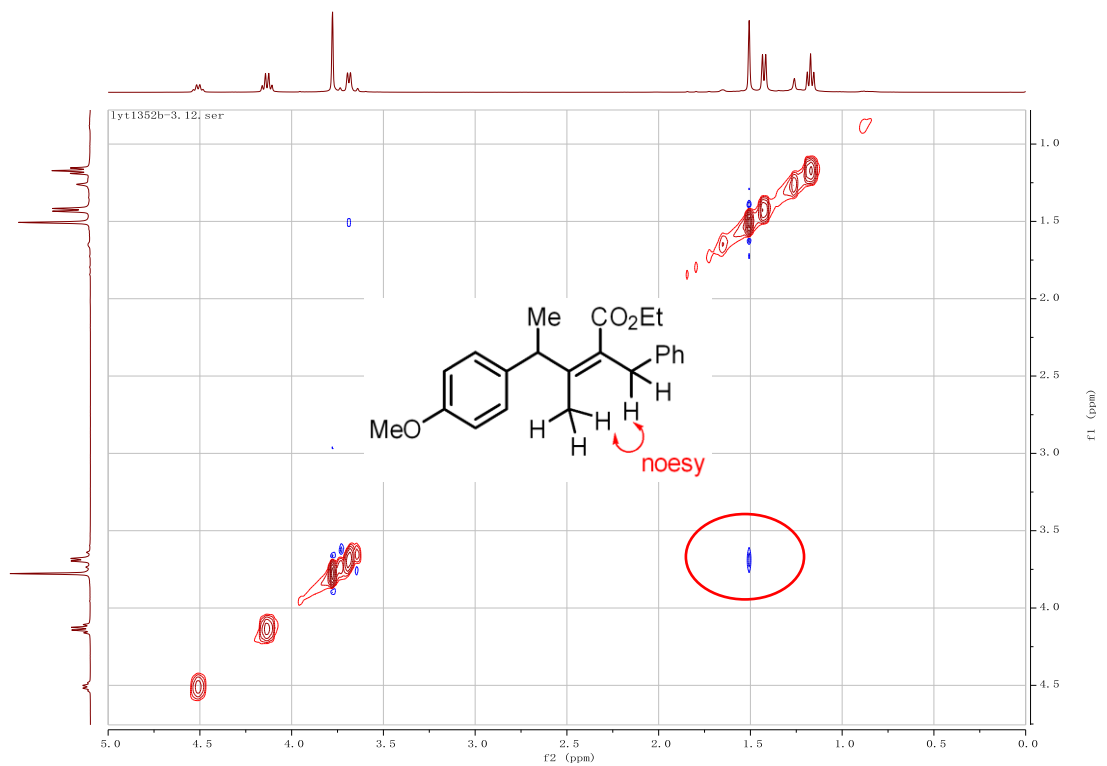

H-H NOESY (product of reaction 3):



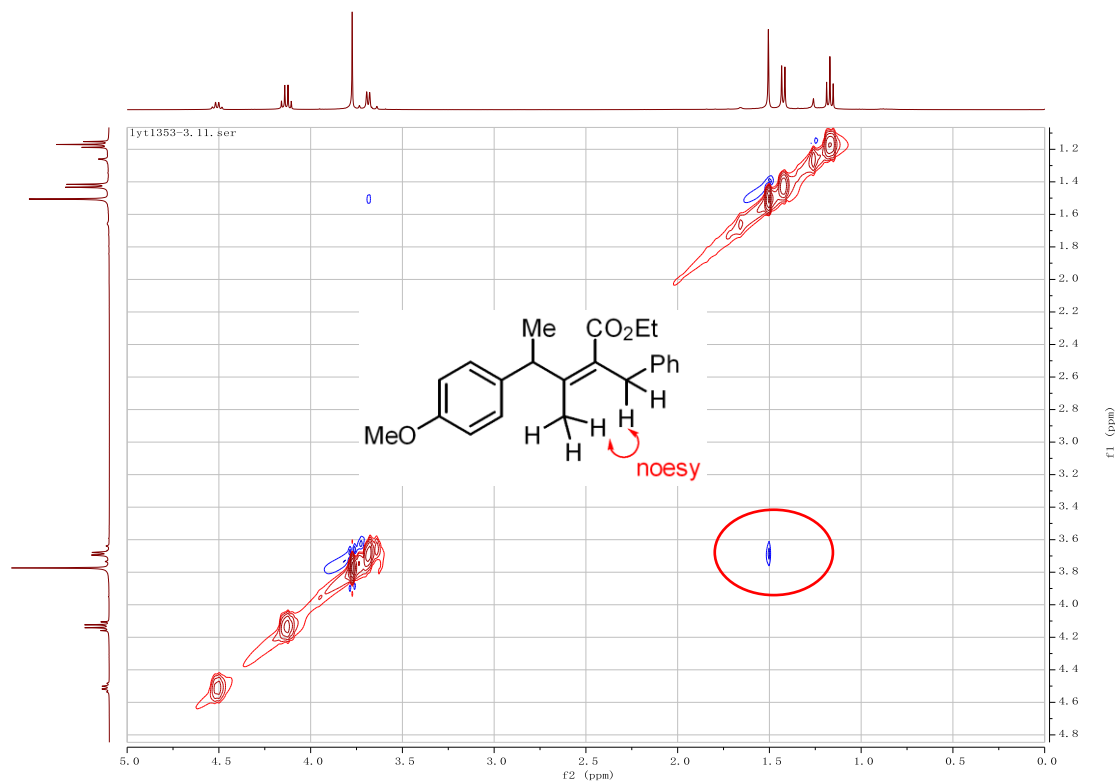

They have the same H-H NOESY spectrum.

## 6. NMR spectrum of substrates

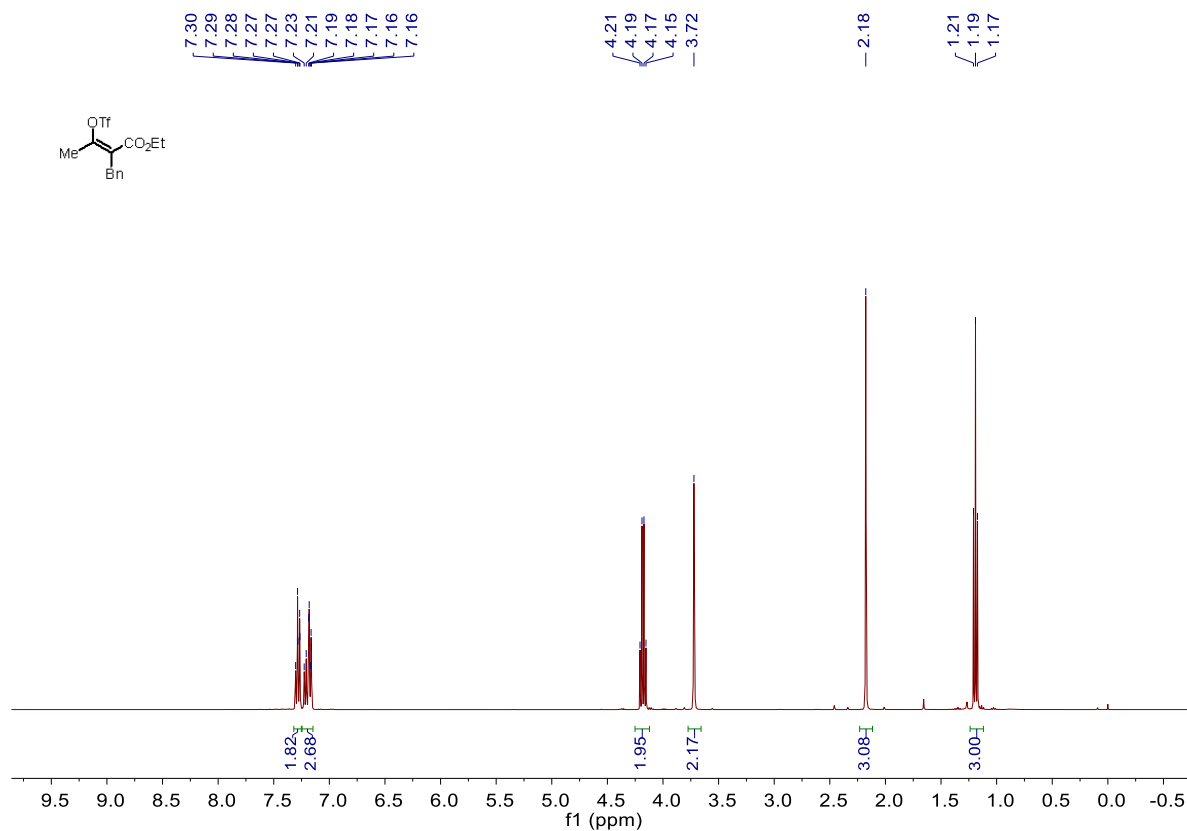

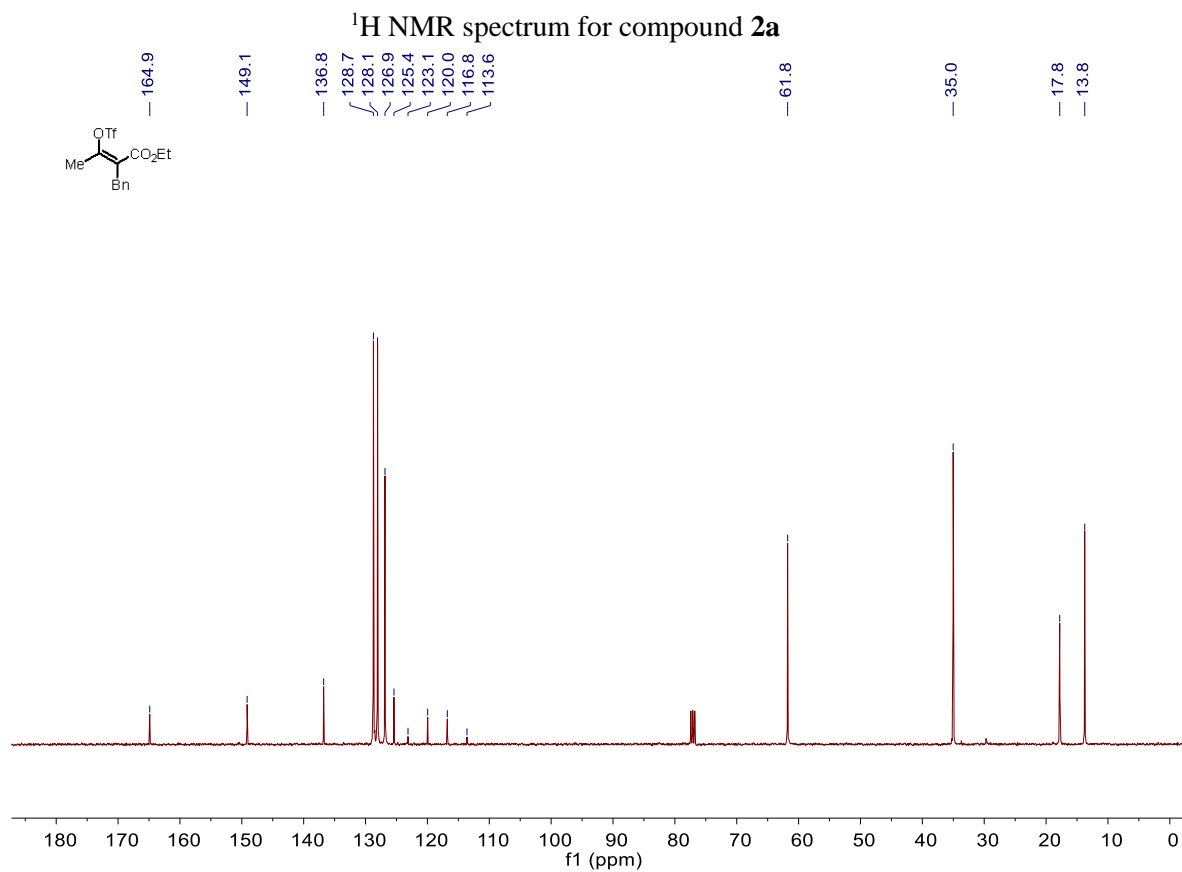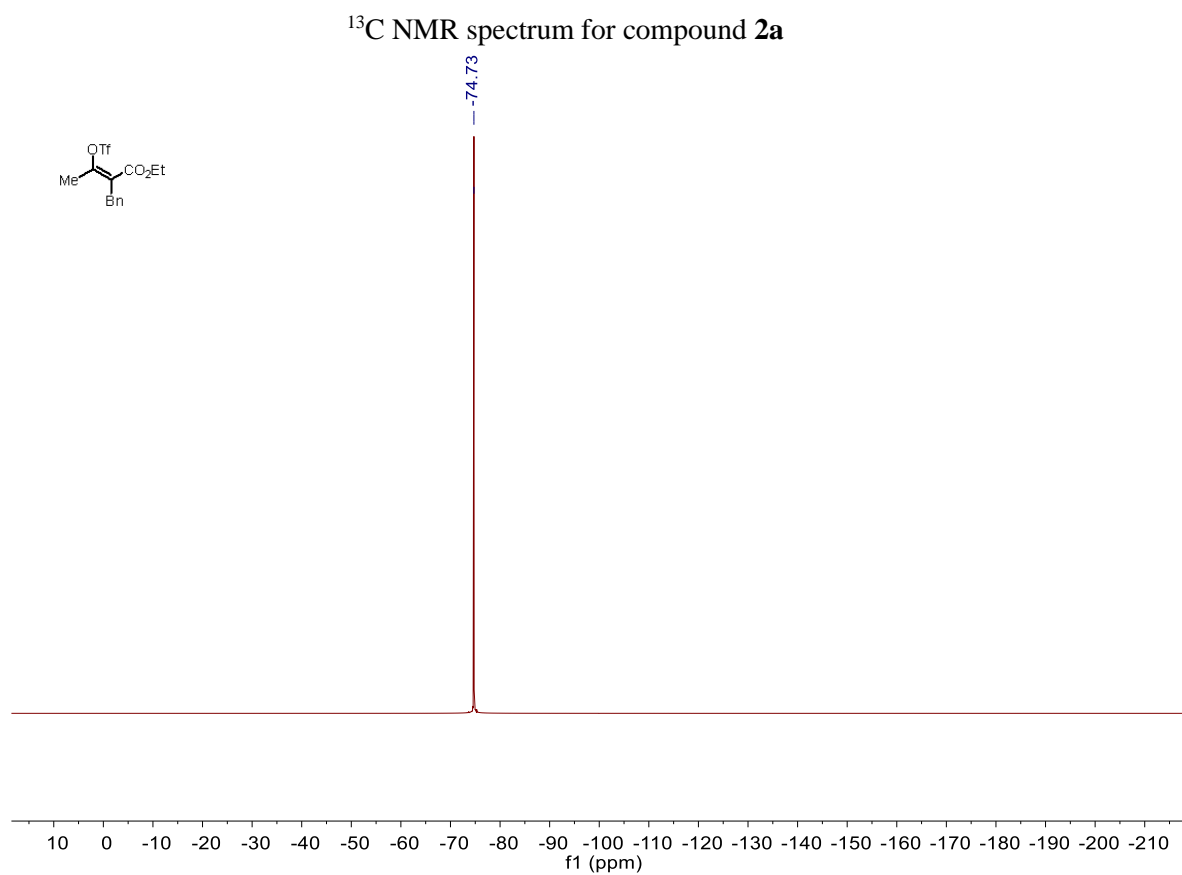

**<sup>19</sup>F NMR spectrum for compound 2a**

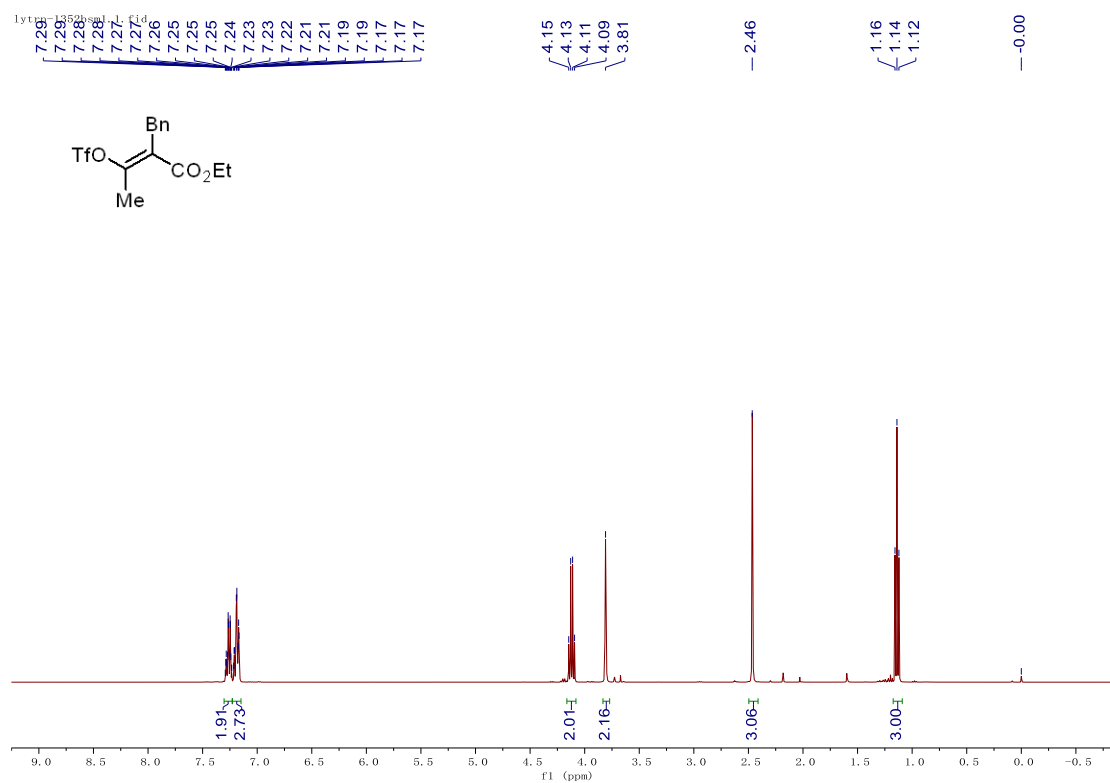

<sup>1</sup>H NMR spectrum for compound **2a'**

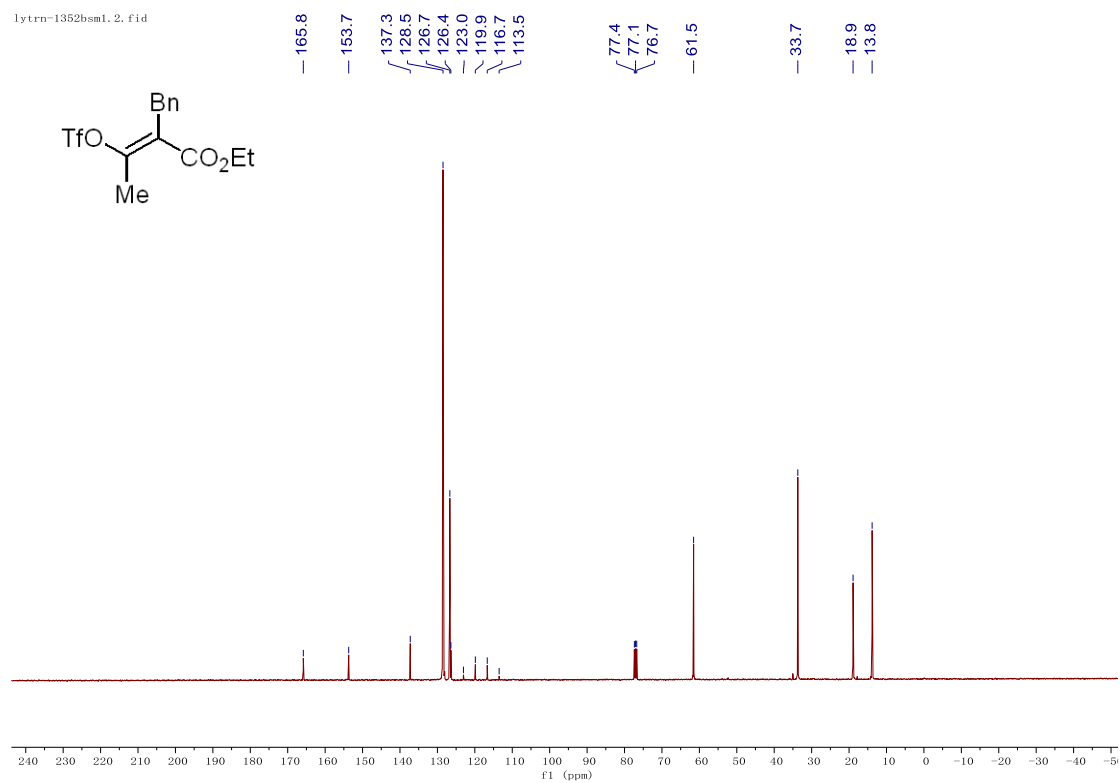

<sup>13</sup>C NMR spectrum for compound **2a'**

lytrn-1352bsml.3.fid

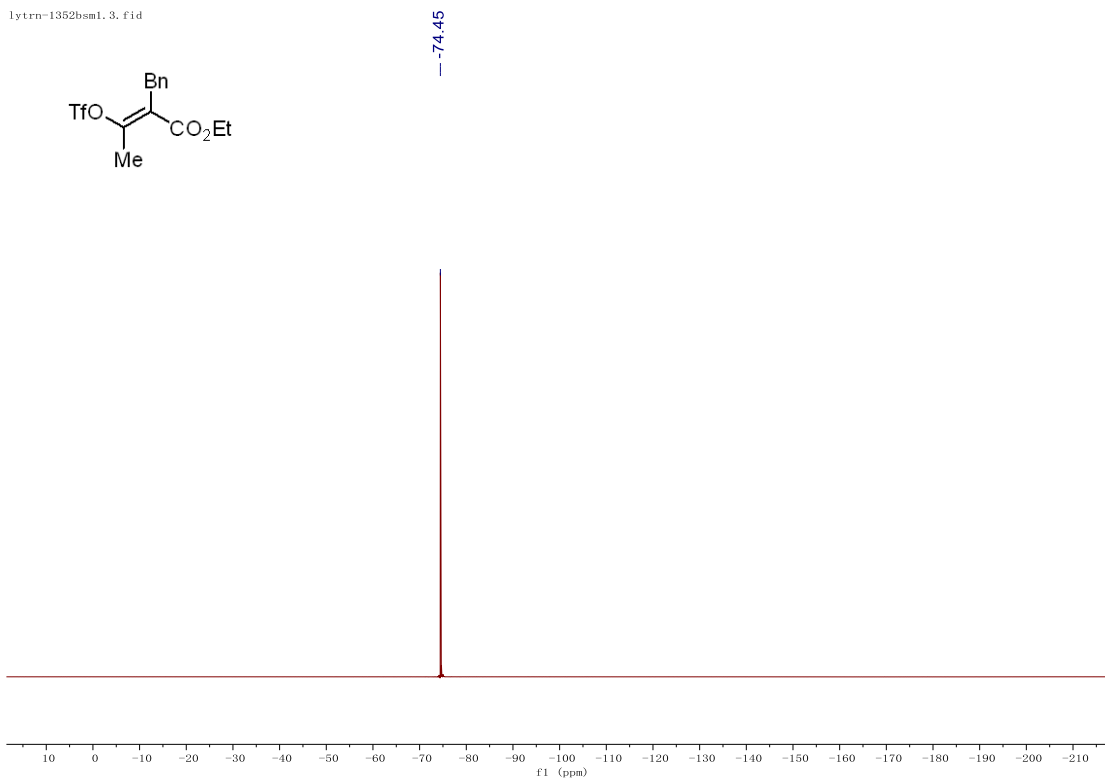

<sup>19</sup>F NMR spectrum for compound **2a'**

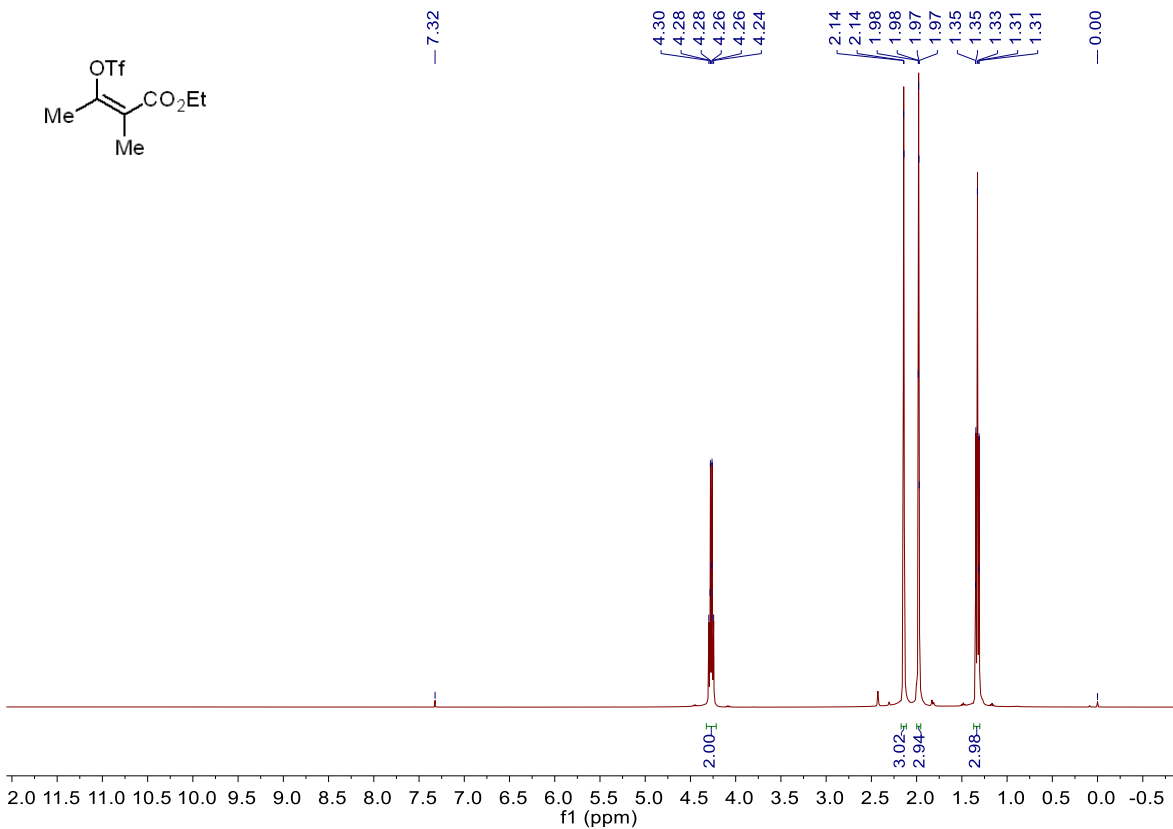

<sup>1</sup>H NMR spectrum for compound **2b**

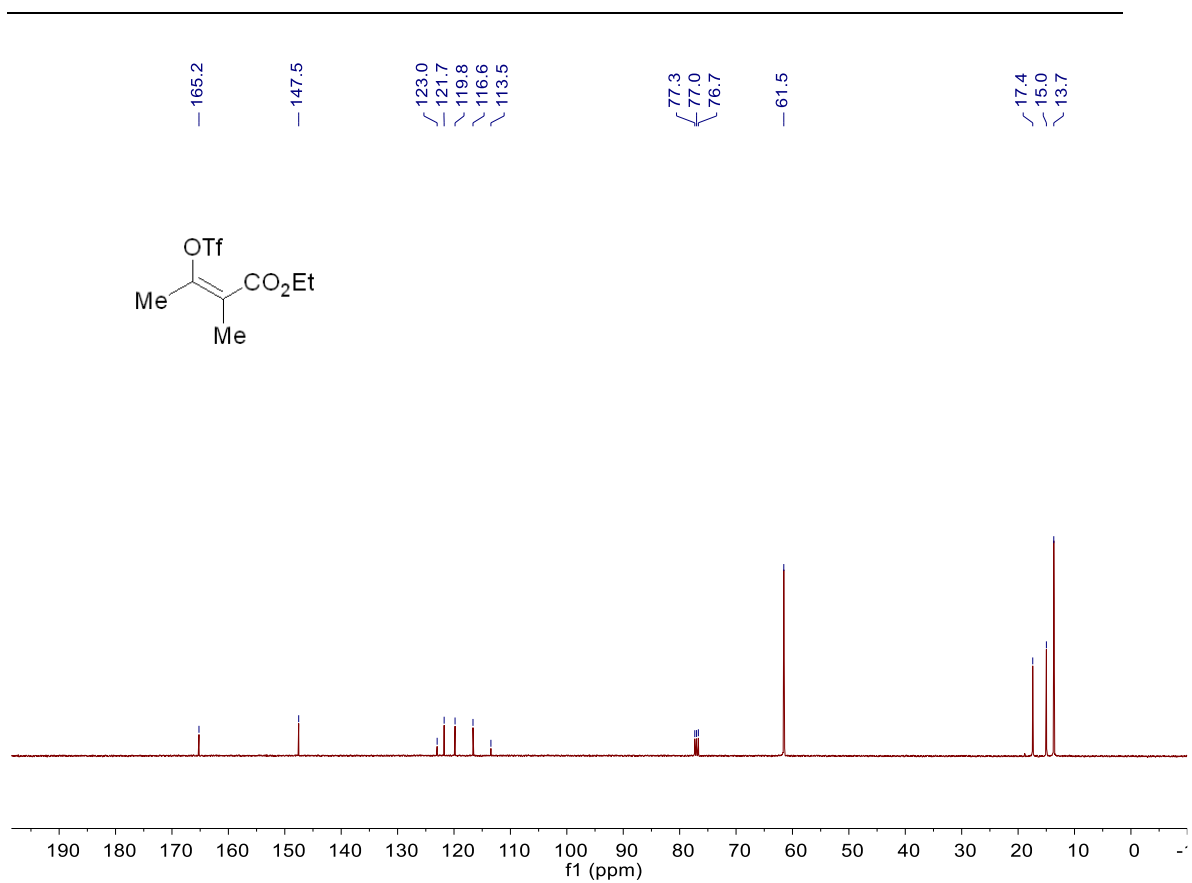

<sup>13</sup>C NMR spectrum for compound **2b**

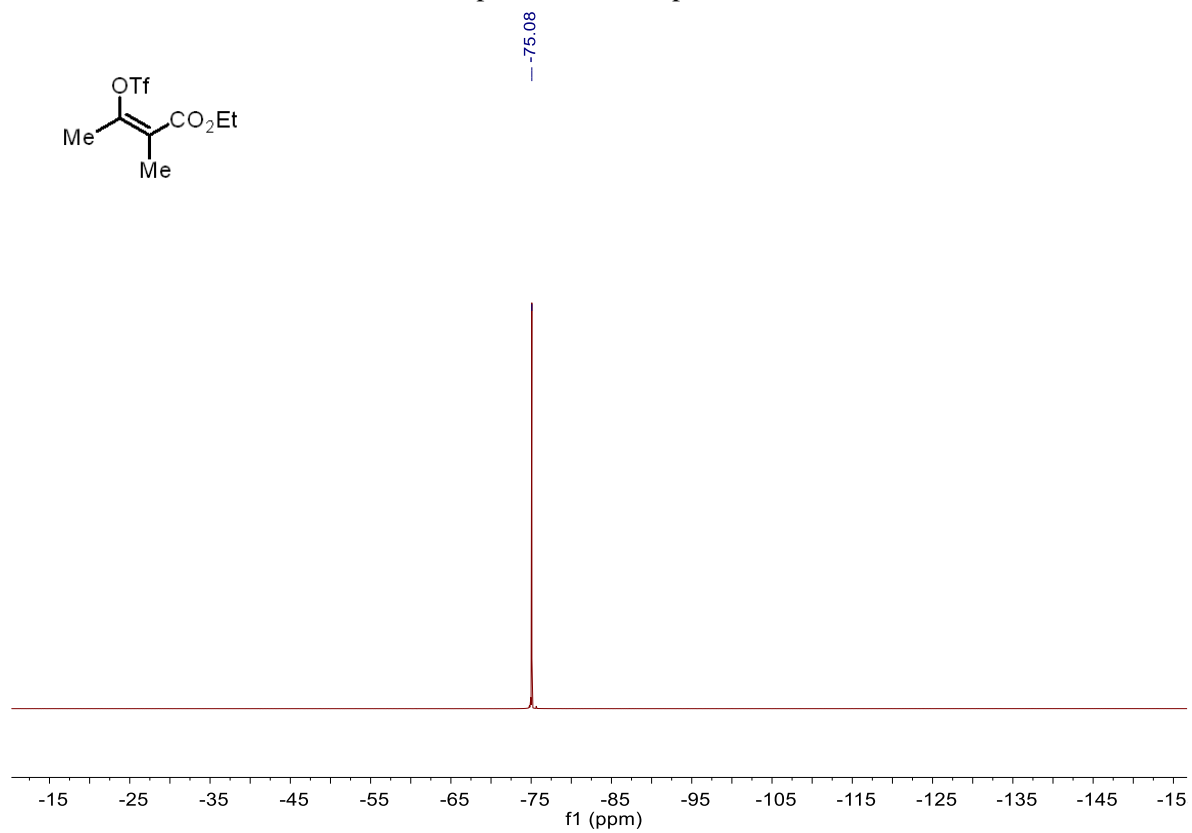

<sup>19</sup>F NMR spectrum for compound **2b**

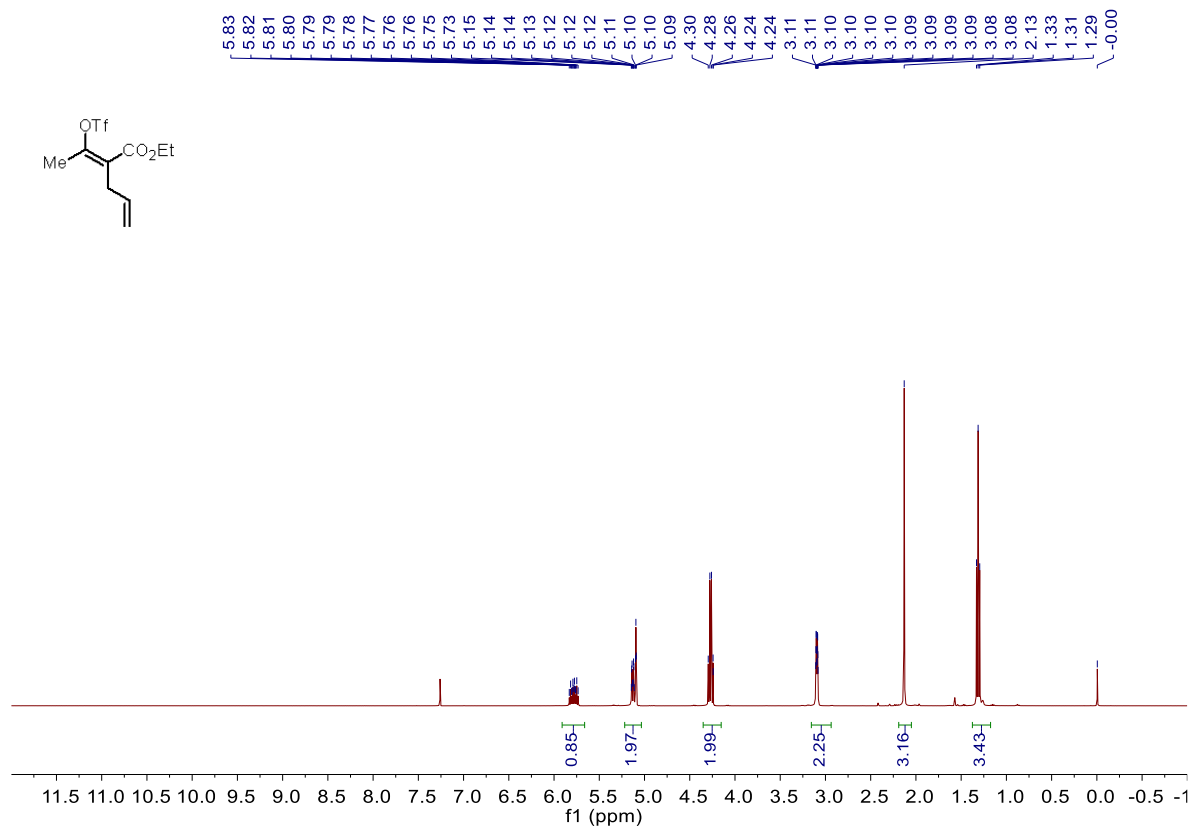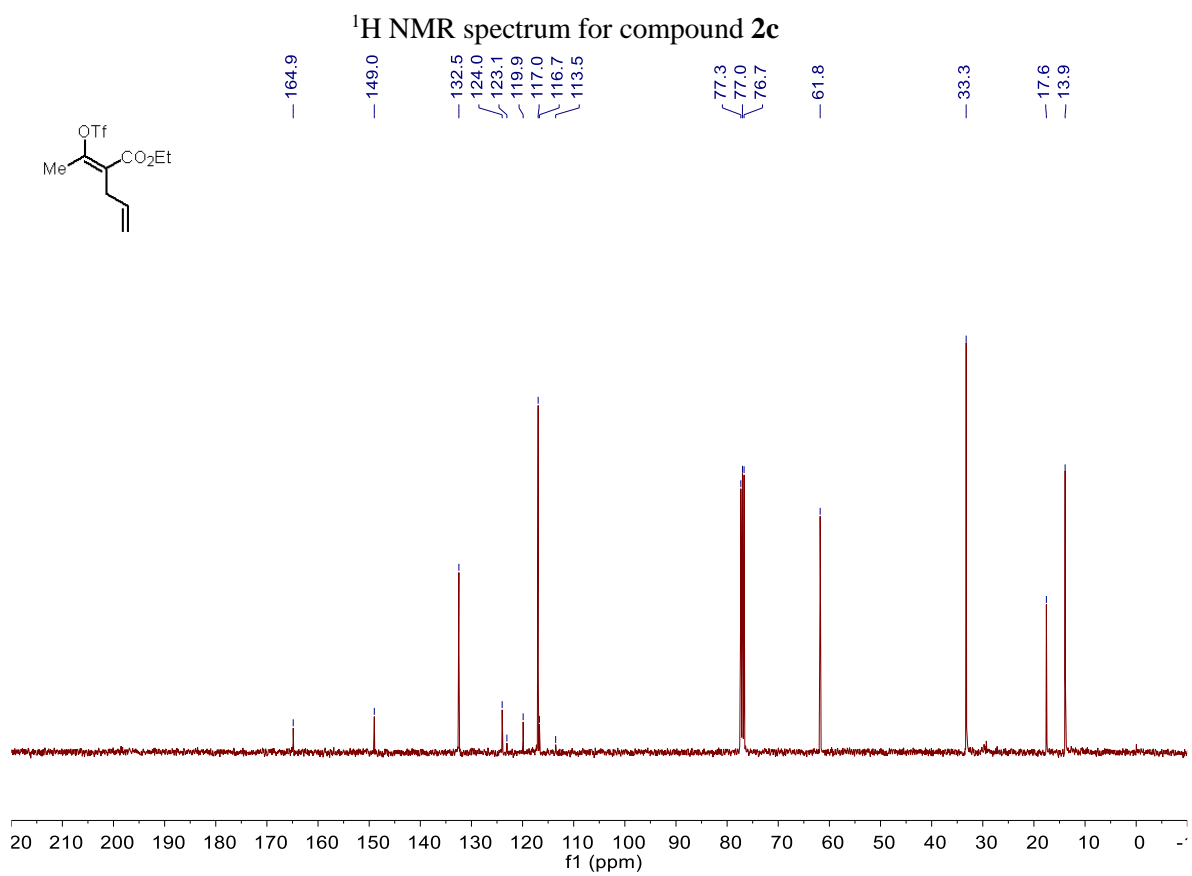

<sup>13</sup>C NMR spectrum for compound **2c**

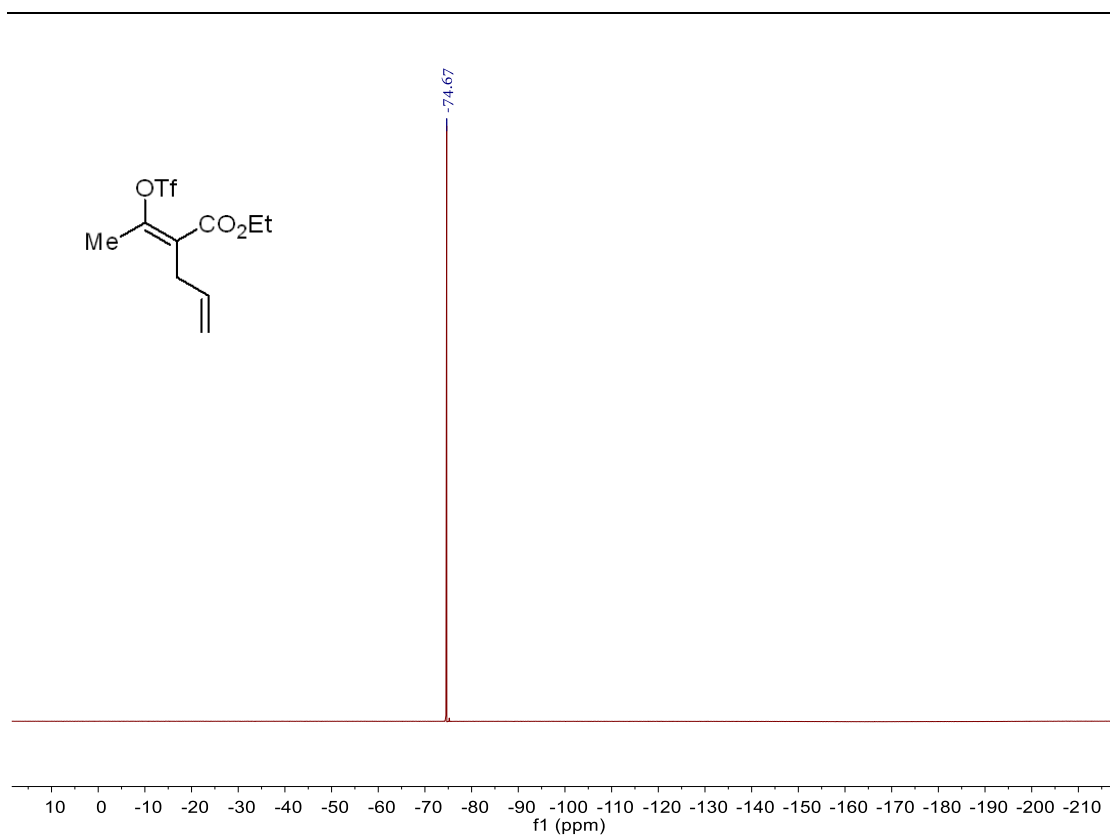

$^{19}\text{F}$  NMR spectrum for compound **2c**

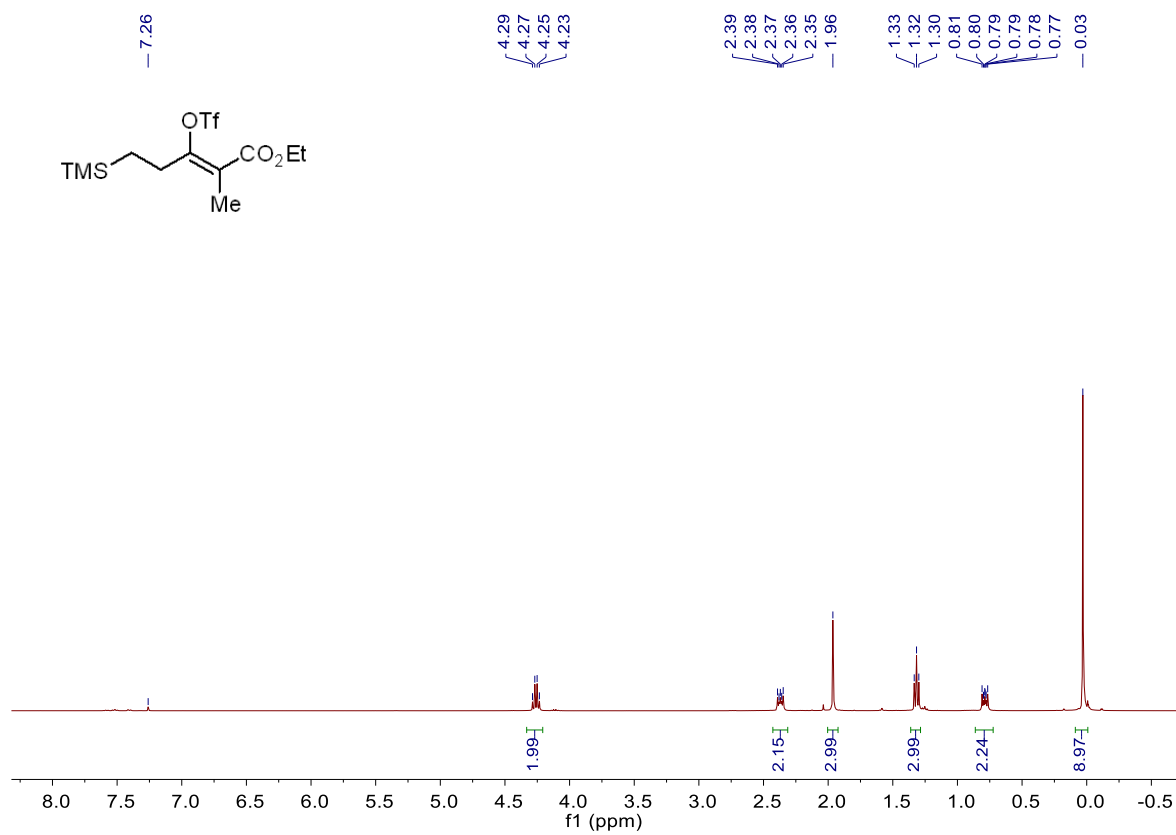

$^1\text{H}$  NMR spectrum for compound **2d**

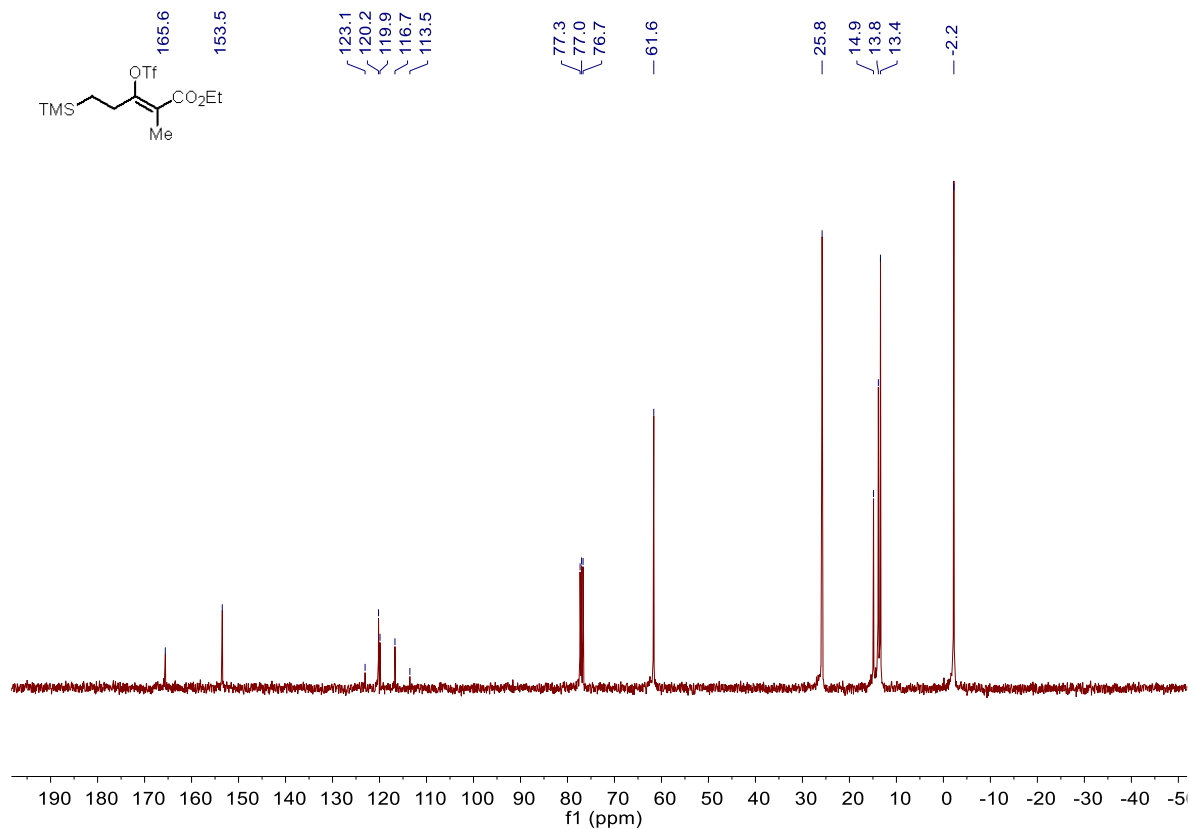

<sup>13</sup>C NMR spectrum for compound **2d**

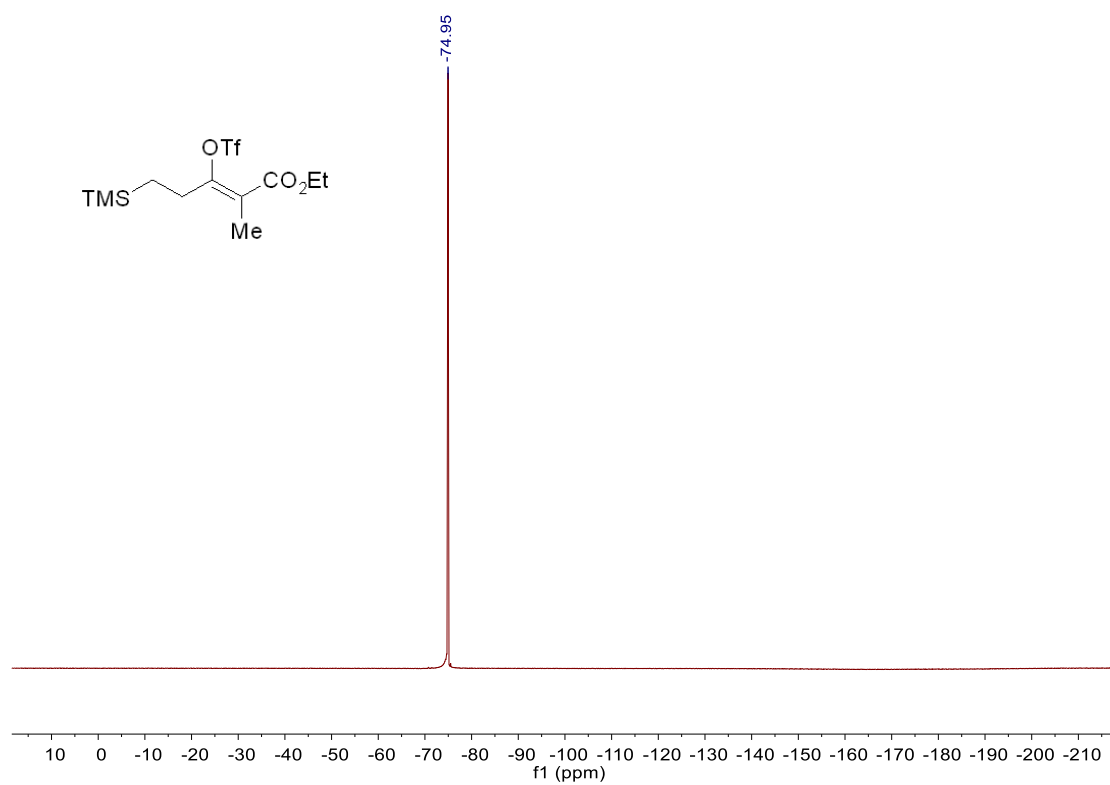

<sup>19</sup>F NMR spectrum for compound **2d**



lytrn-2.1.fid

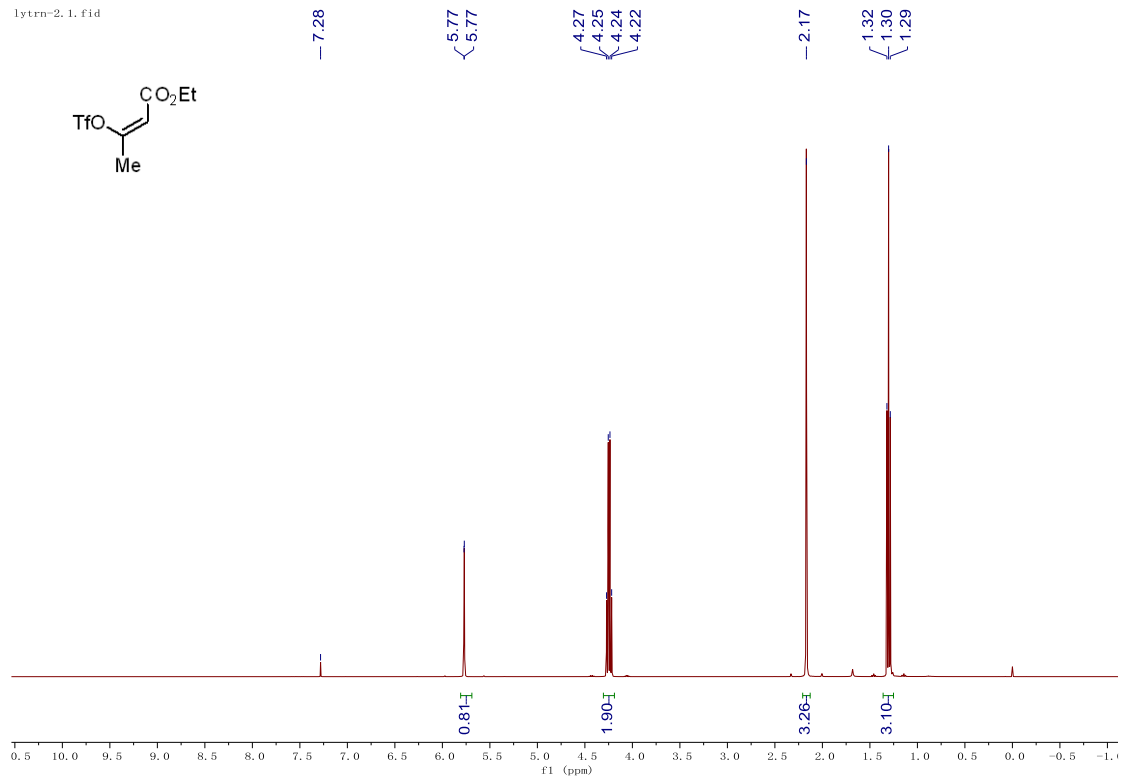

<sup>1</sup>H NMR spectrum for compound 2e

lytrn-2.2.fid

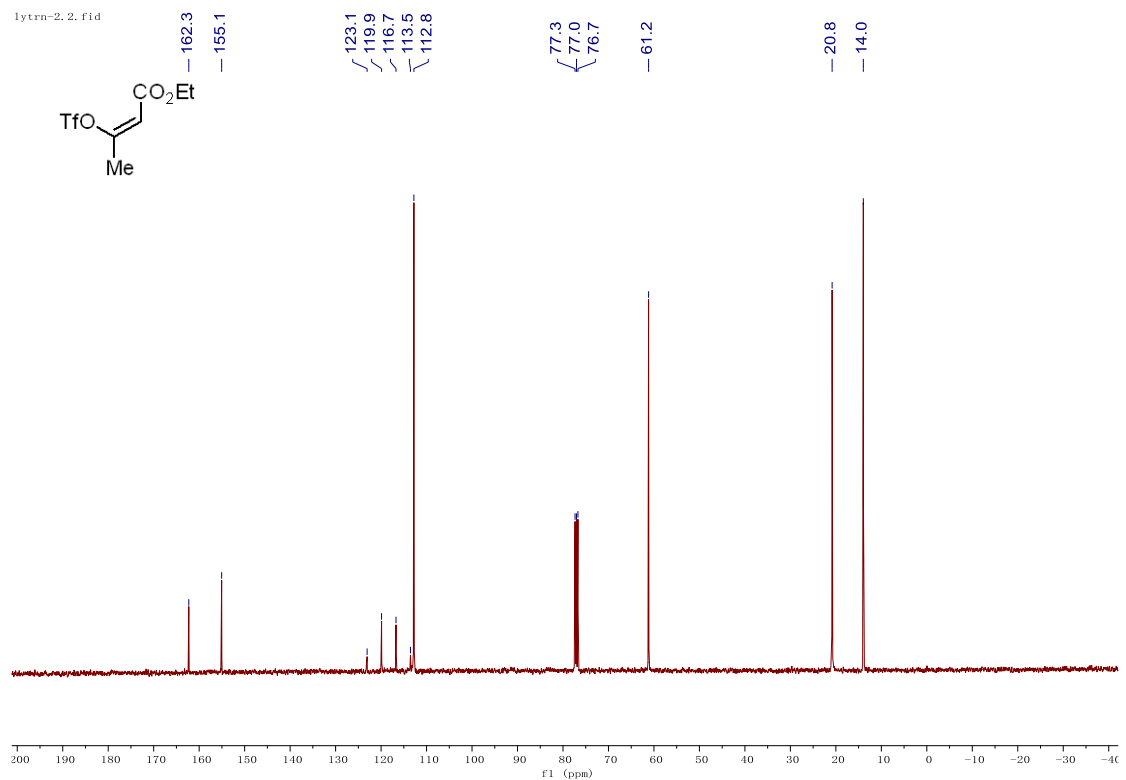

<sup>13</sup>C NMR spectrum for compound 2e

lytrn-2.3.fid

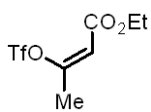

-74.8

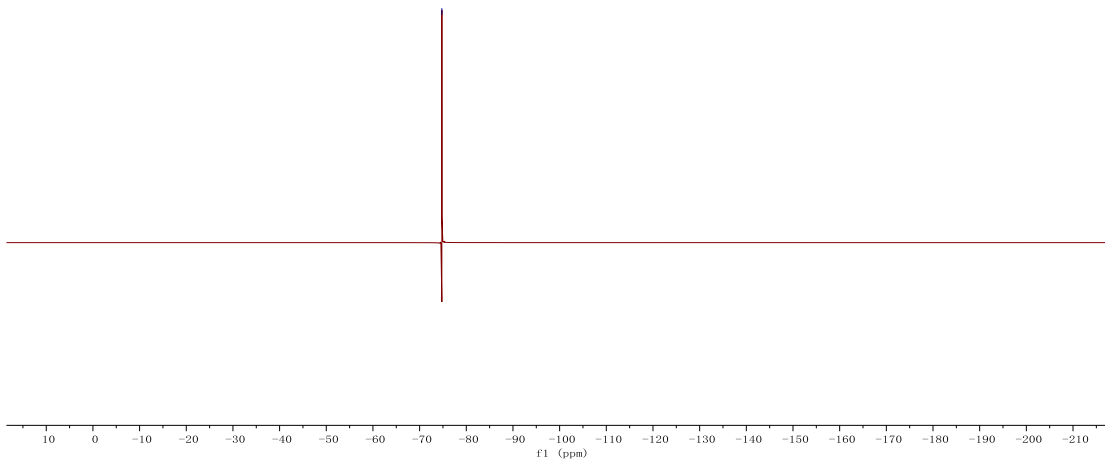

<sup>19</sup>F NMR spectrum for compound 2e

lytrn-3.1.fid

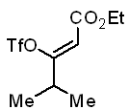

-7.28

-5.77

4.28  
4.27  
4.25  
4.23

2.66  
2.65  
2.63  
2.61  
2.60  
2.58  
2.56

1.33  
1.31  
1.30  
1.22  
1.20

-0.00

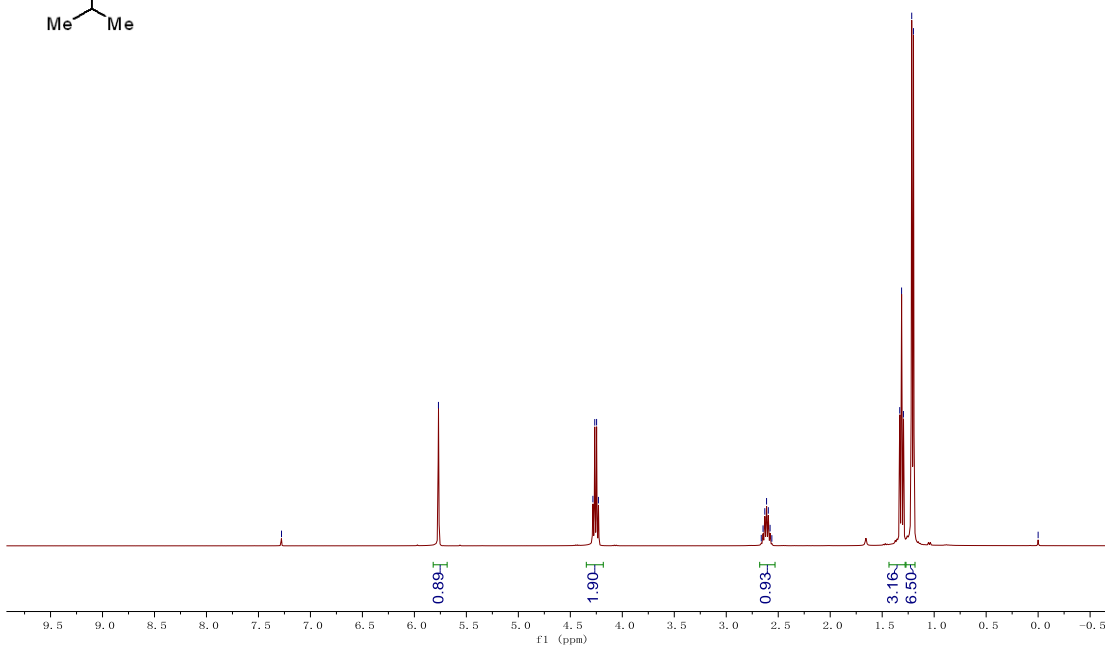

<sup>1</sup>H NMR spectrum for compound 2f

lytrn-3.2.fid

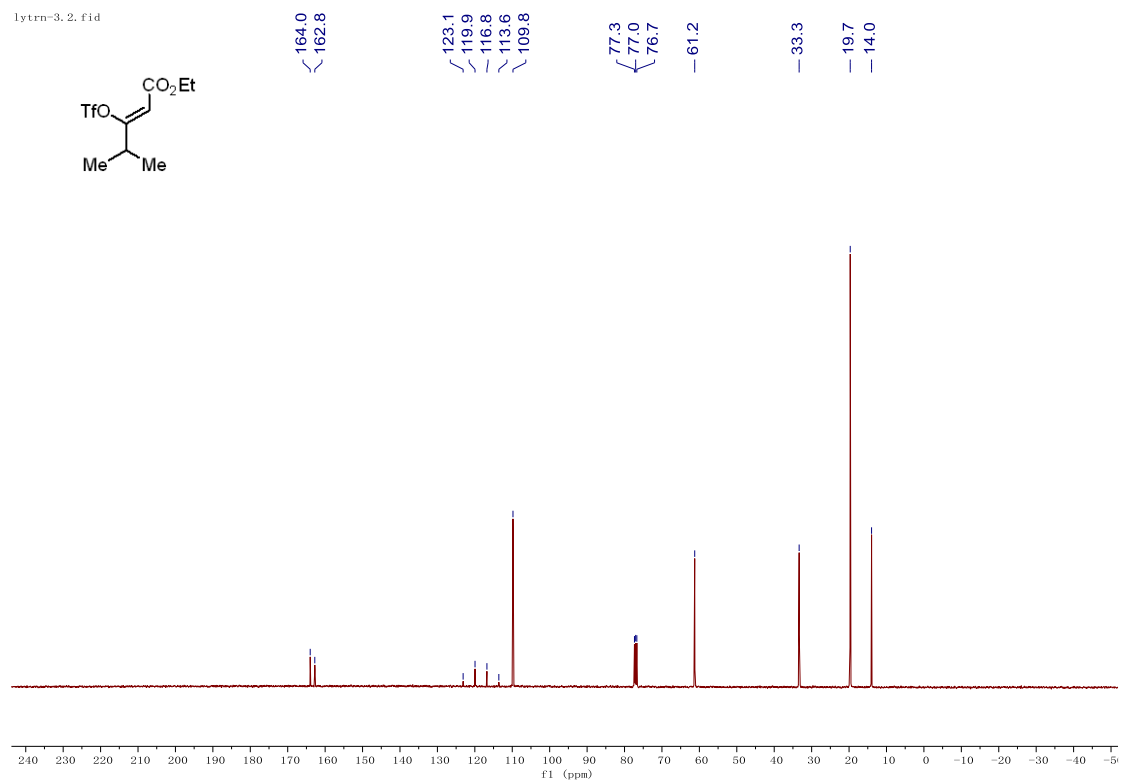

lytrn-3.3.fid

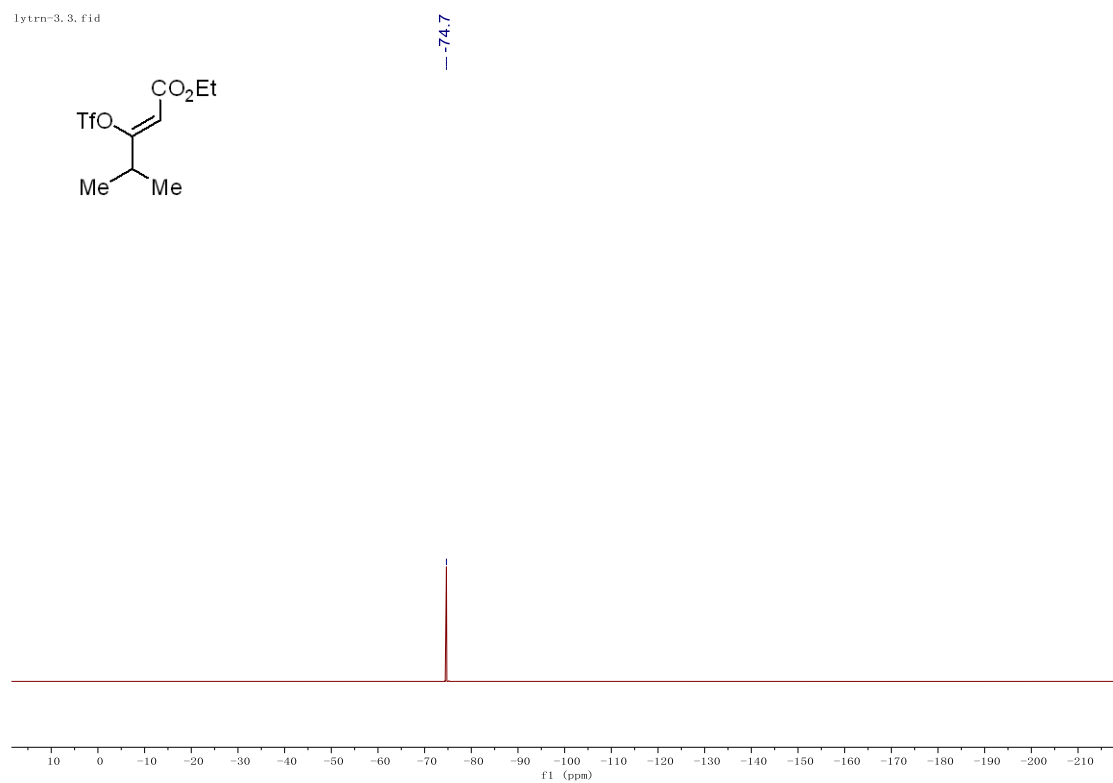

lytrn-4.1.fid

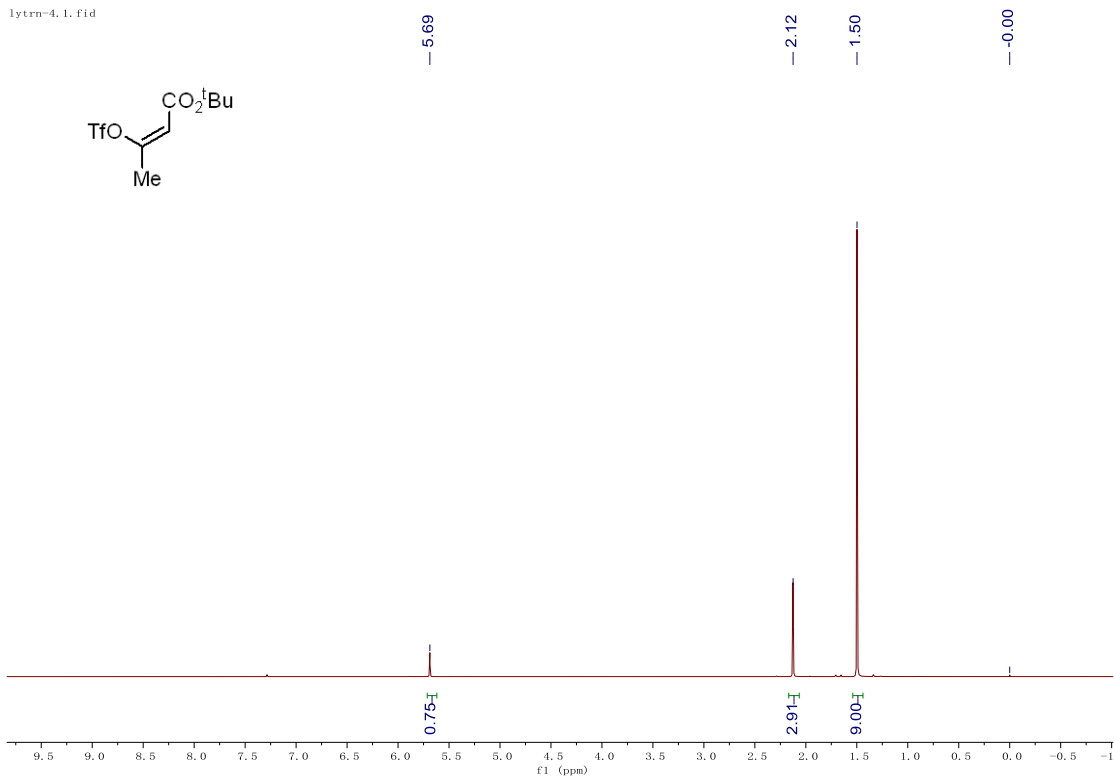

<sup>1</sup>H NMR spectrum for compound 2g

lytrn-4.2.fid

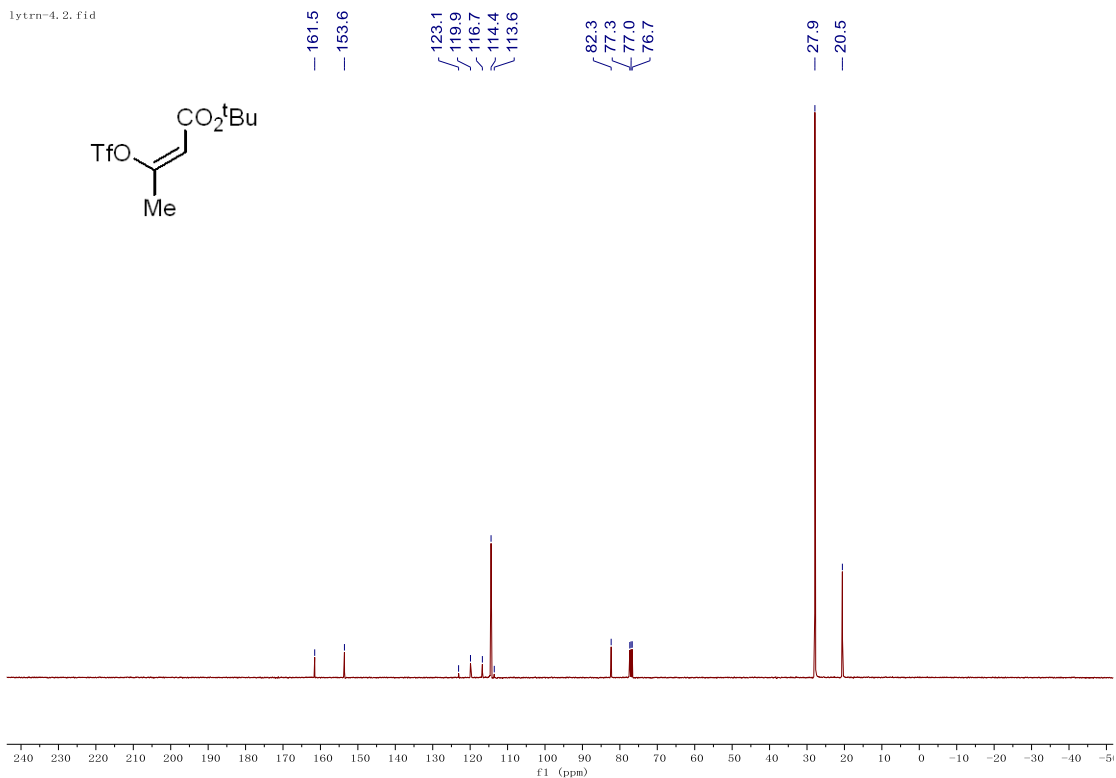

<sup>13</sup>C NMR spectrum for compound 2g

lytrn-4.3. fid

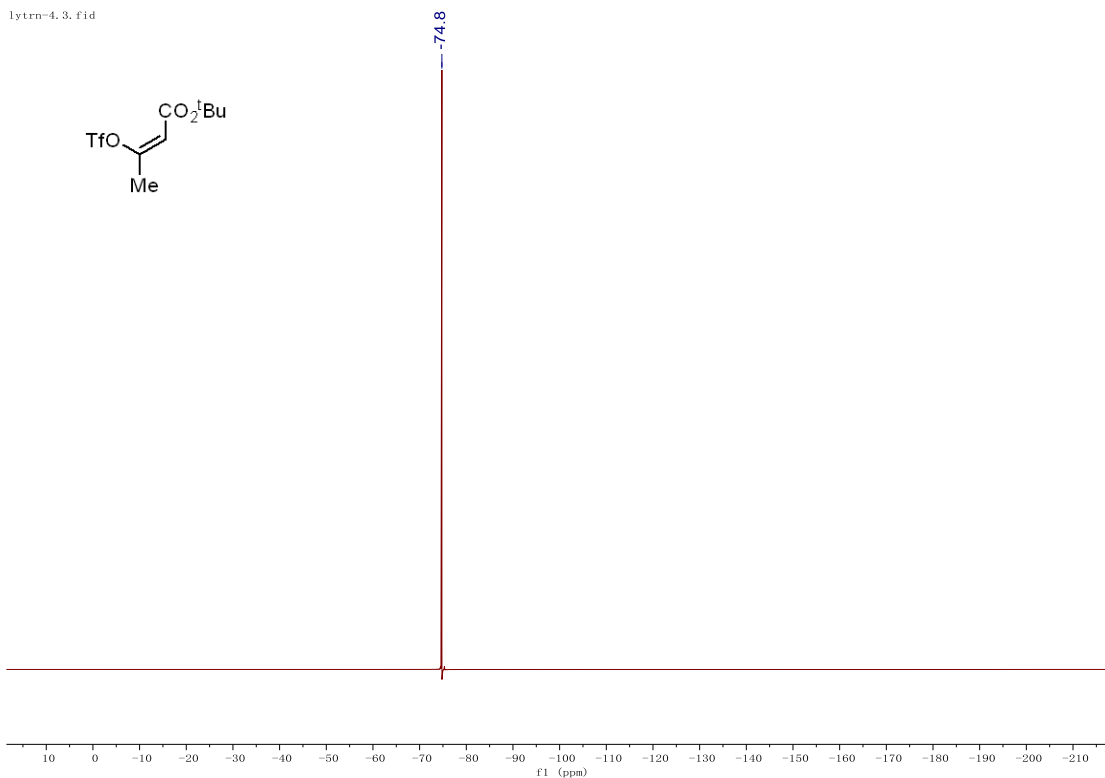

<sup>19</sup>F NMR spectrum for compound 2g

lytrn-13.1. fid

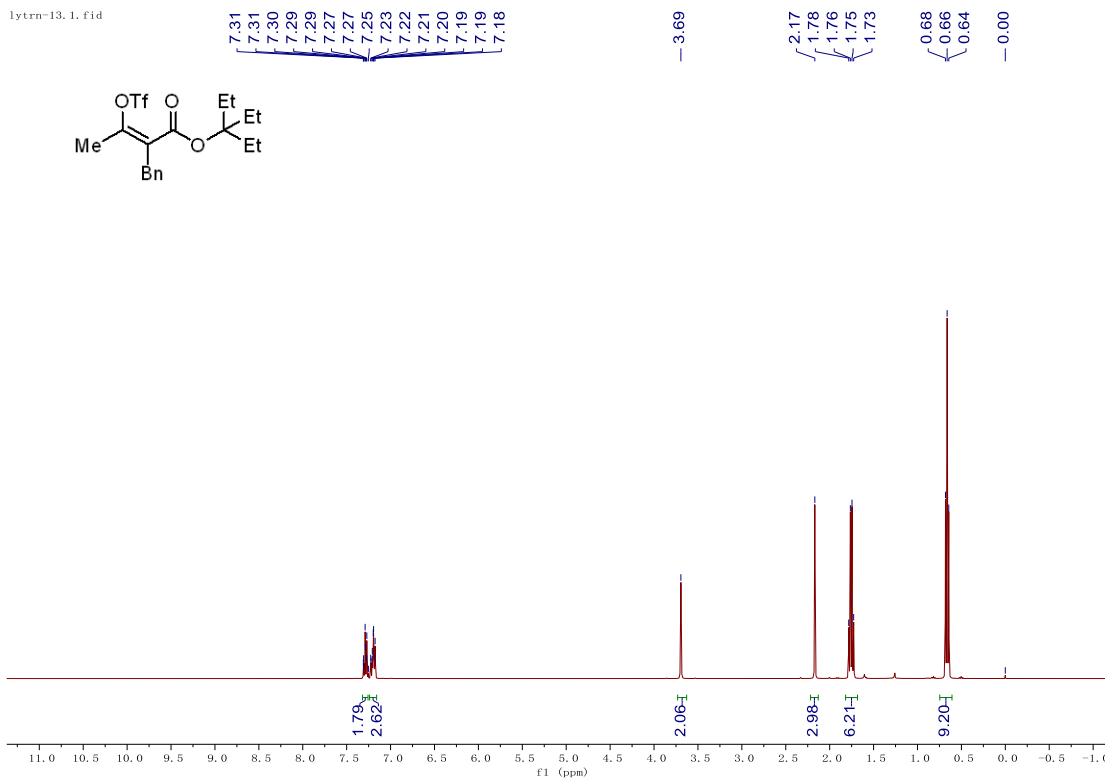

<sup>1</sup>H NMR spectrum for compound 2h

lytrn-13.2.fid

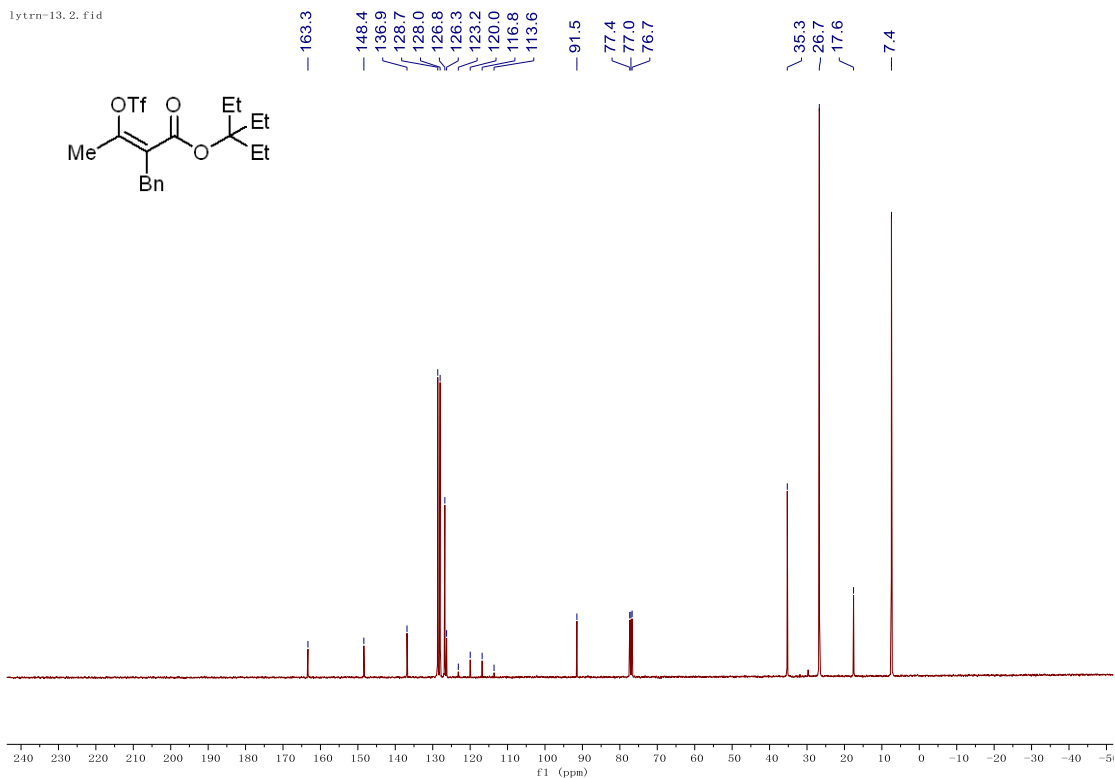

lytrn-13.3.fid

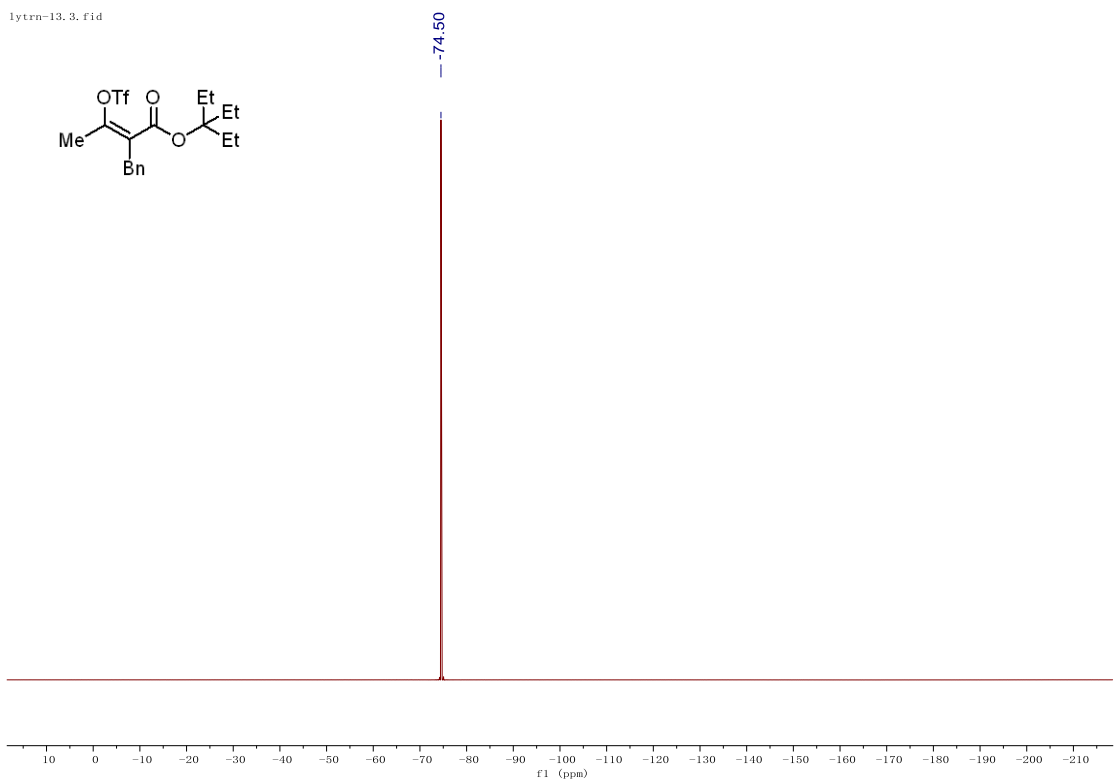

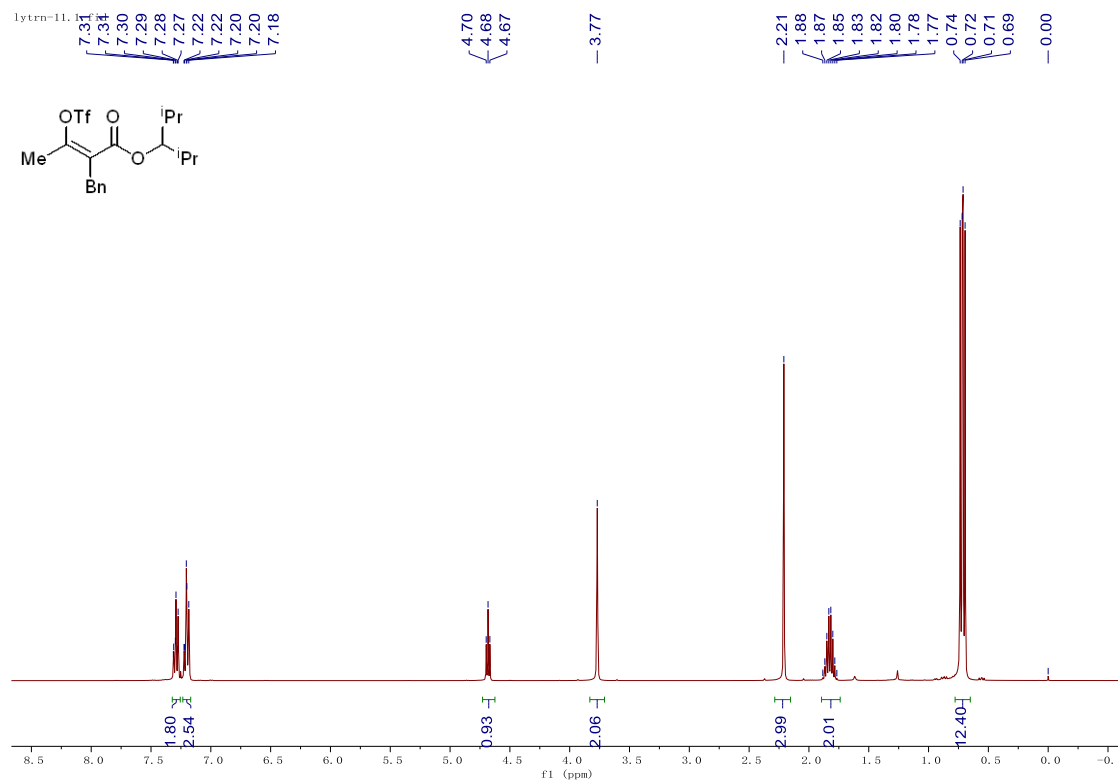

<sup>1</sup>H NMR spectrum for compound **2i**

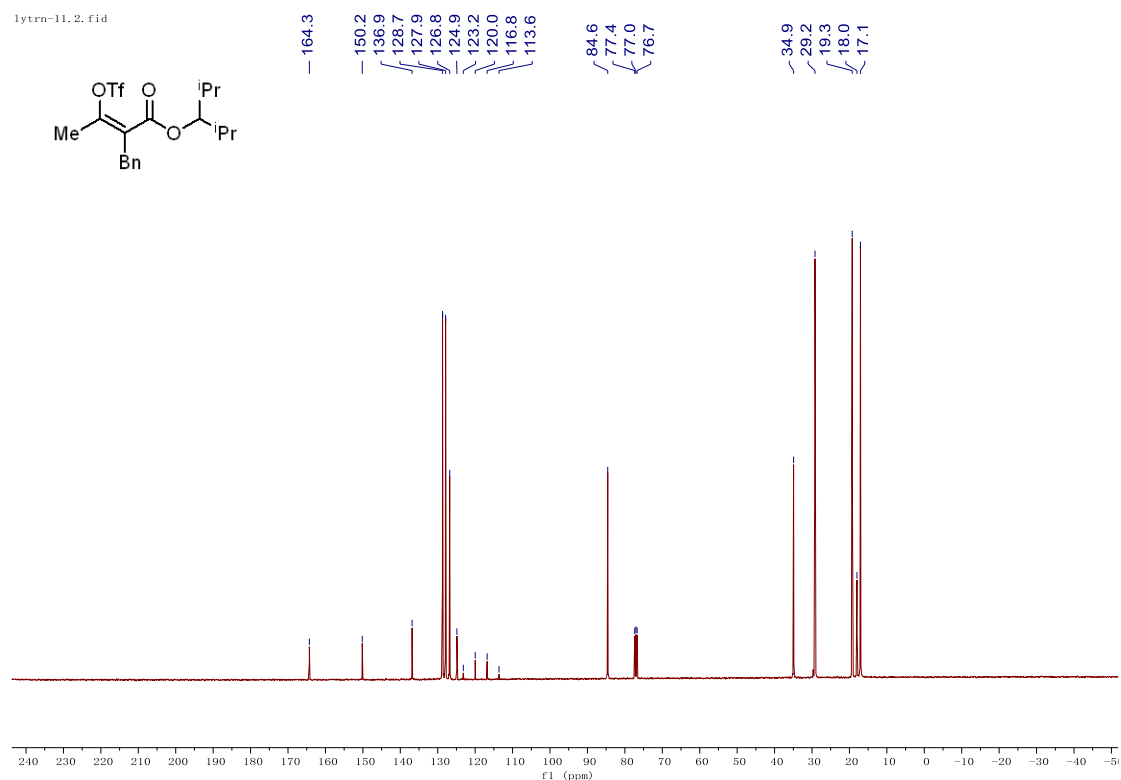

<sup>13</sup>C NMR spectrum for compound **2i**

lytrn-11.3.fid

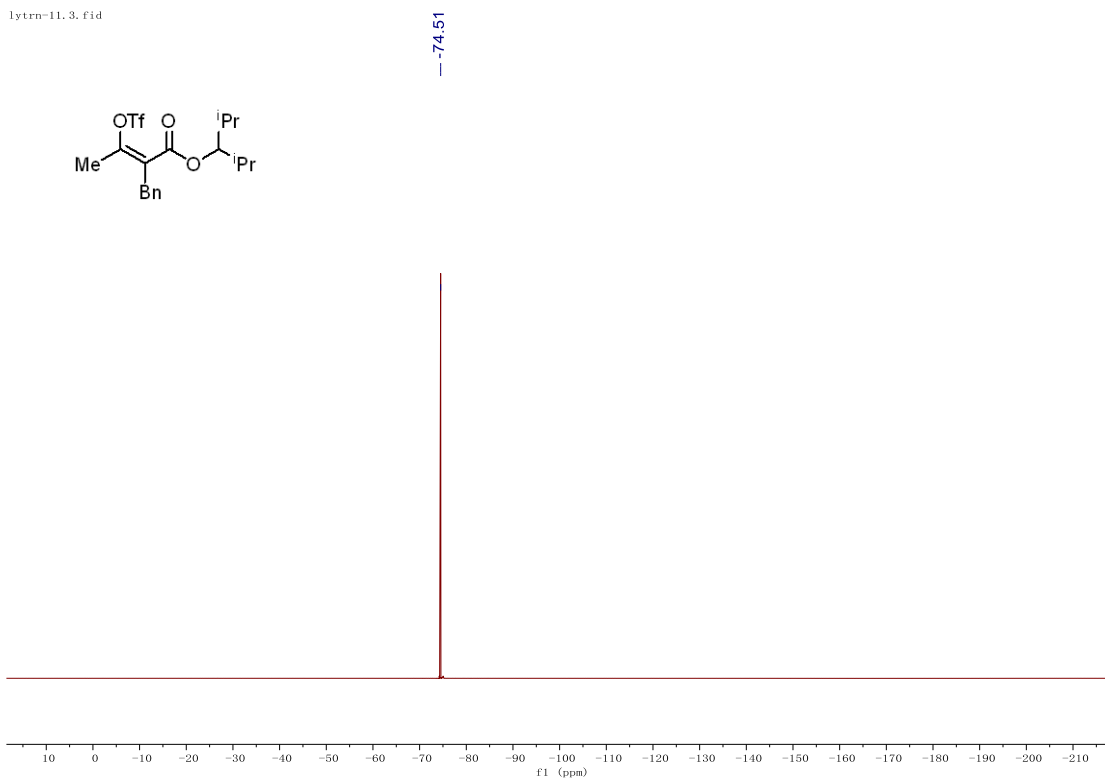

<sup>19</sup>F NMR spectrum for compound **2i**

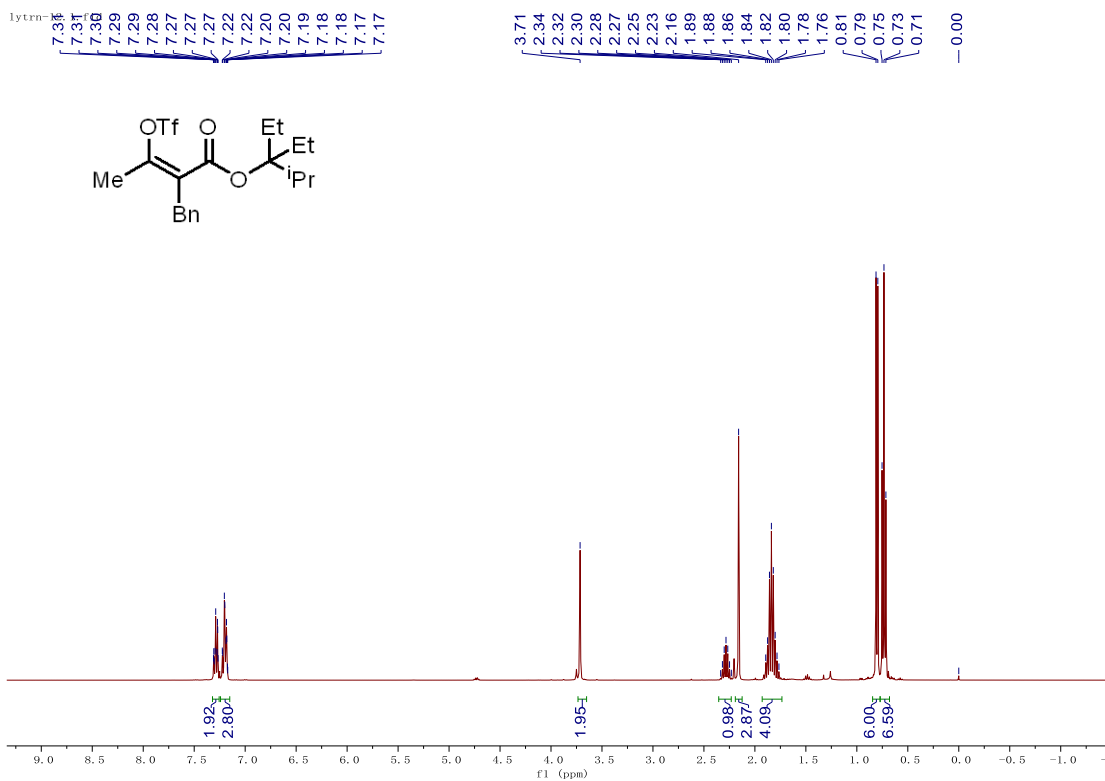

<sup>1</sup>H NMR spectrum for compound **2j**



lytra-12.2.fid

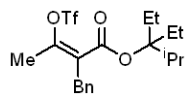

163.5

148.4

136.8

128.7

127.9

126.8

126.8

126.3

123.2

120.0

116.8

113.6

93.5

77.4

77.1

76.7

35.2

33.6

26.7

17.5

17.5

8.6

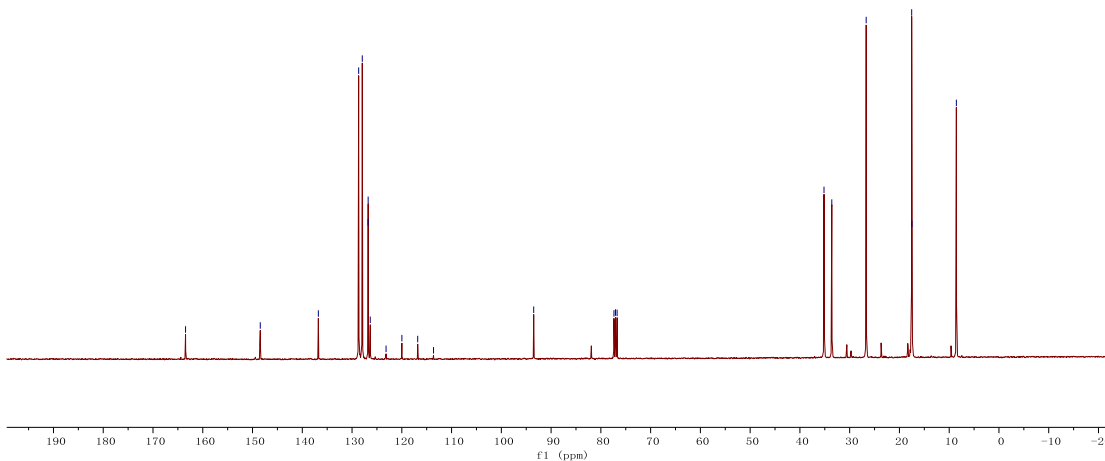

<sup>13</sup>C NMR spectrum for compound 2j

lytra-12.3.fid

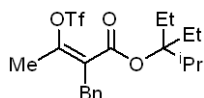

-74.55

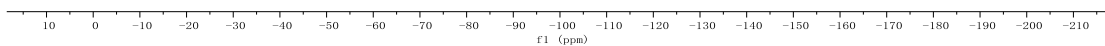

<sup>19</sup>F NMR spectrum for compound 2j

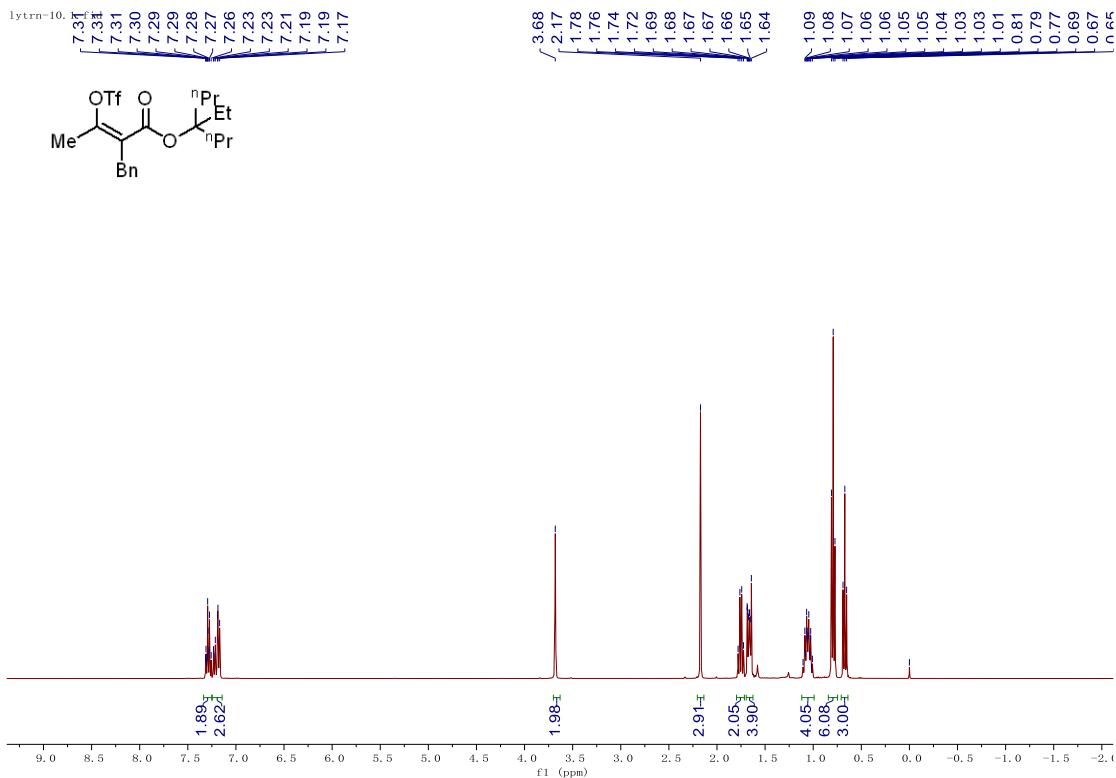

<sup>1</sup>H NMR spectrum for compound **2k**

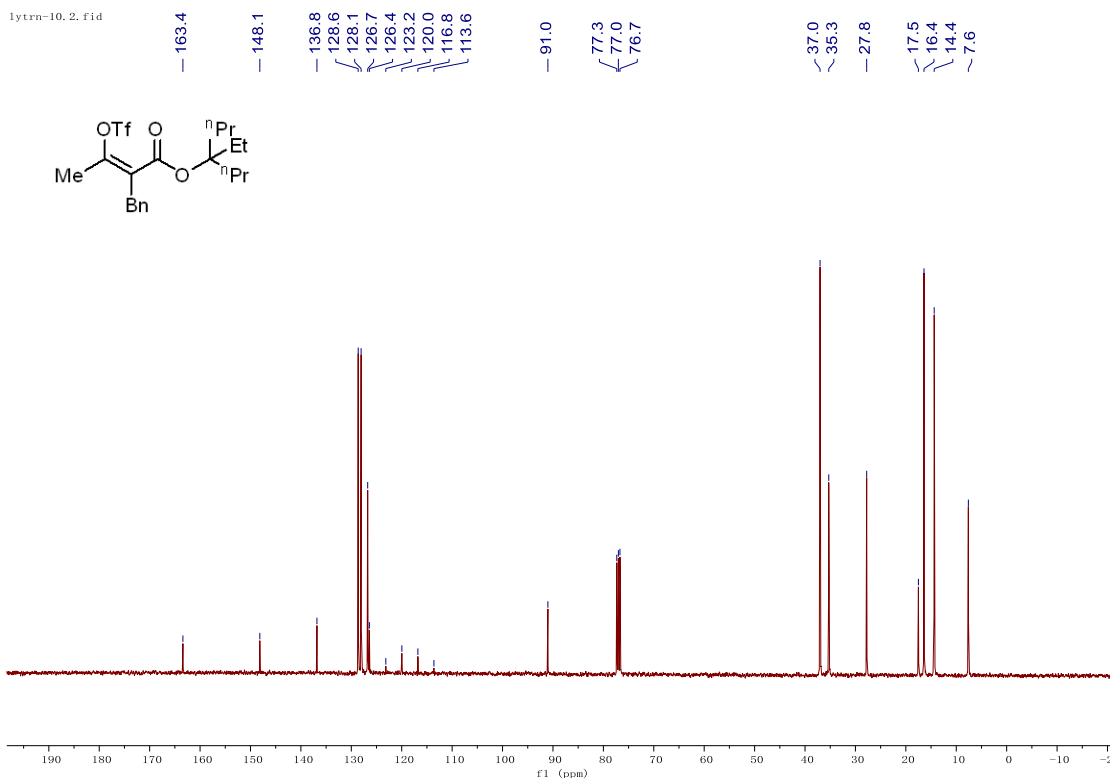

<sup>13</sup>C NMR spectrum for compound **2k**

lytrn-10.3.fid

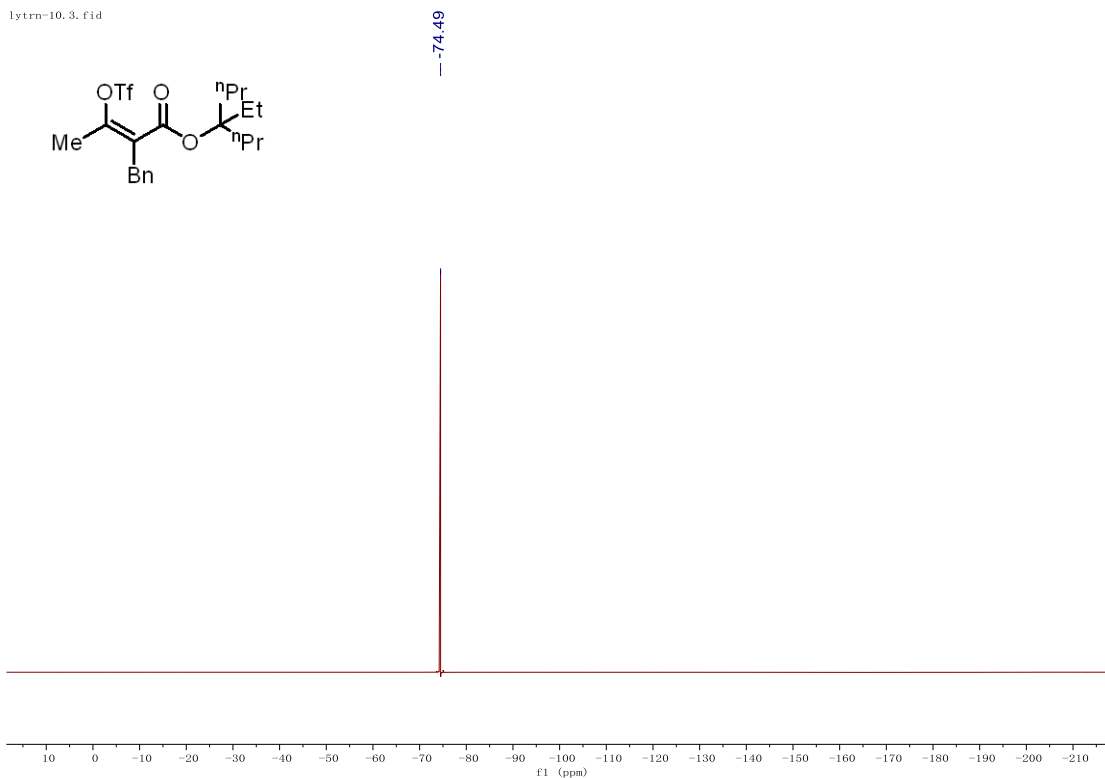

<sup>19</sup>F NMR spectrum for compound 2k

lytrn-9.1.fid

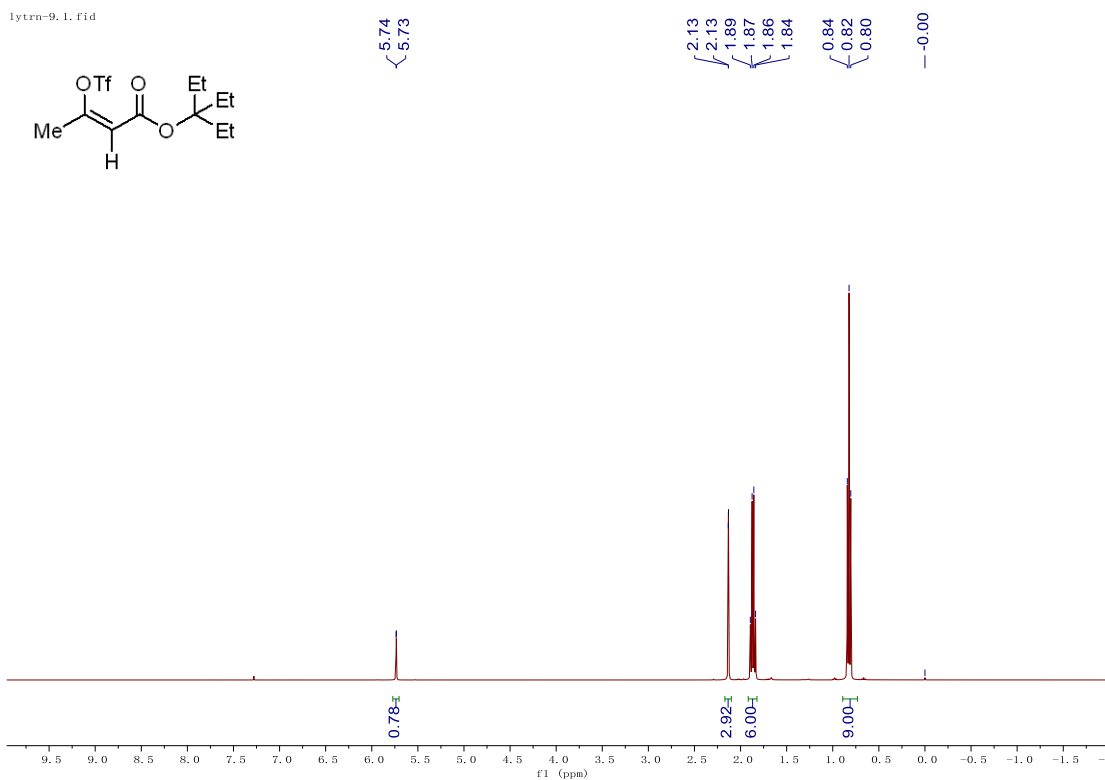

<sup>1</sup>H NMR spectrum for compound 2l

lytrn-9.2.fid

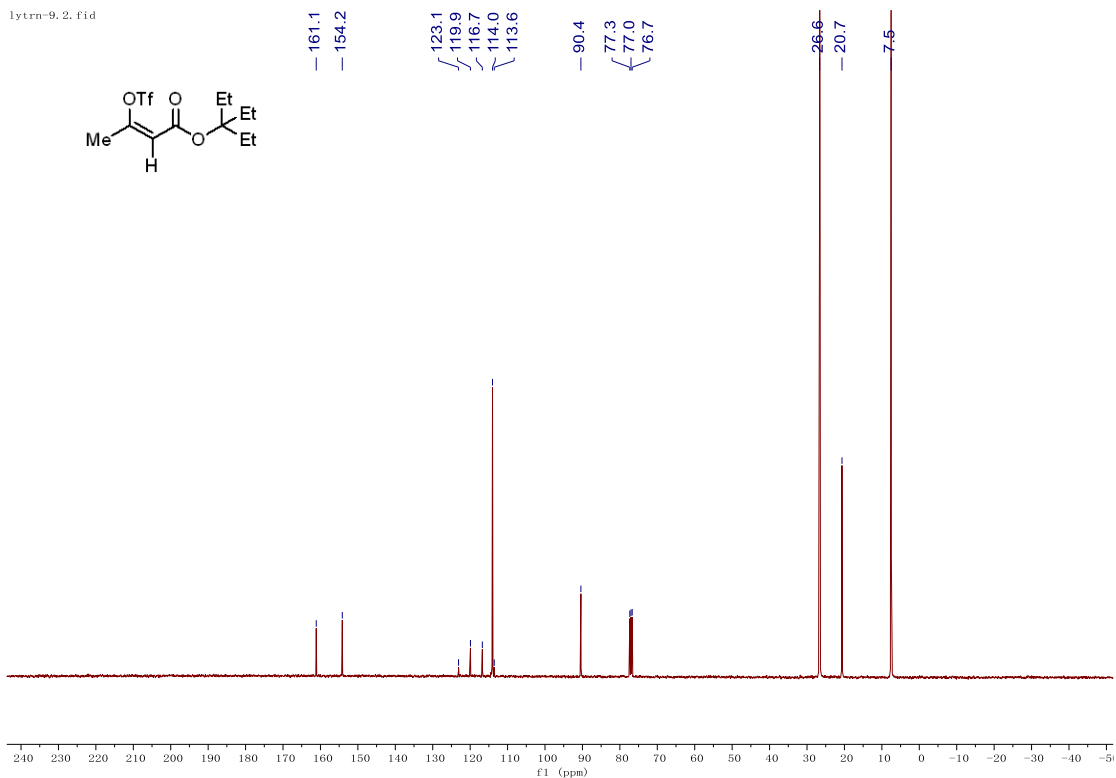

lytrn-9.3.fid

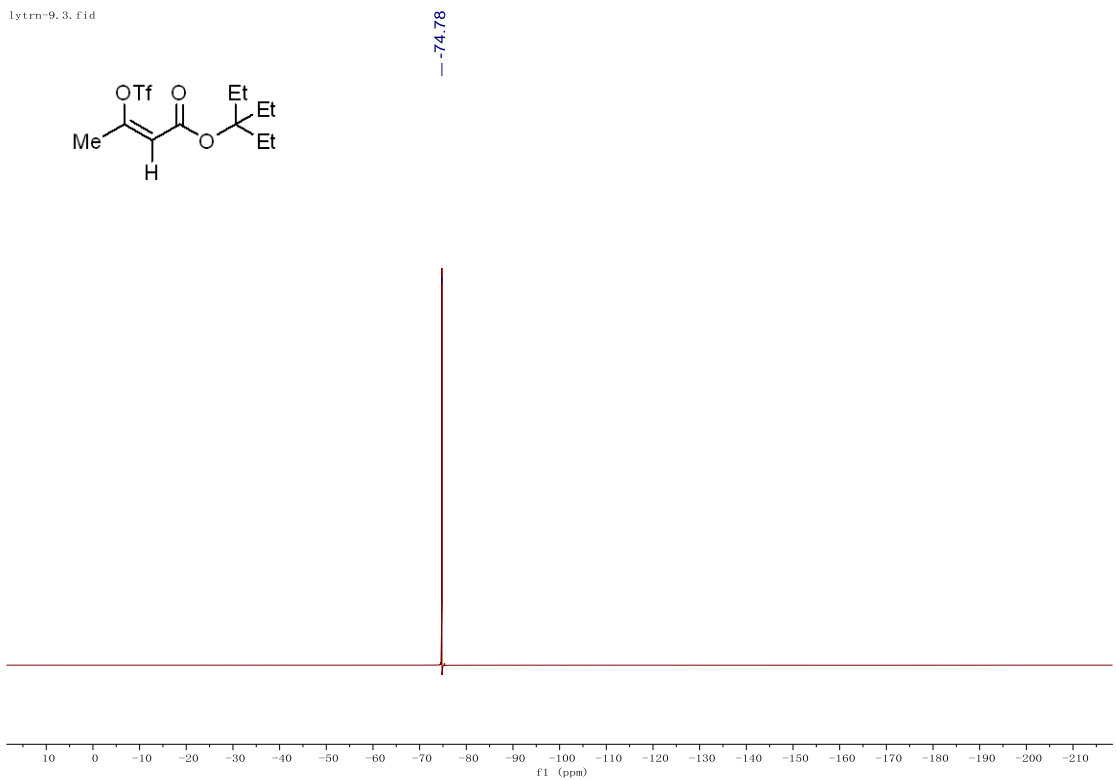

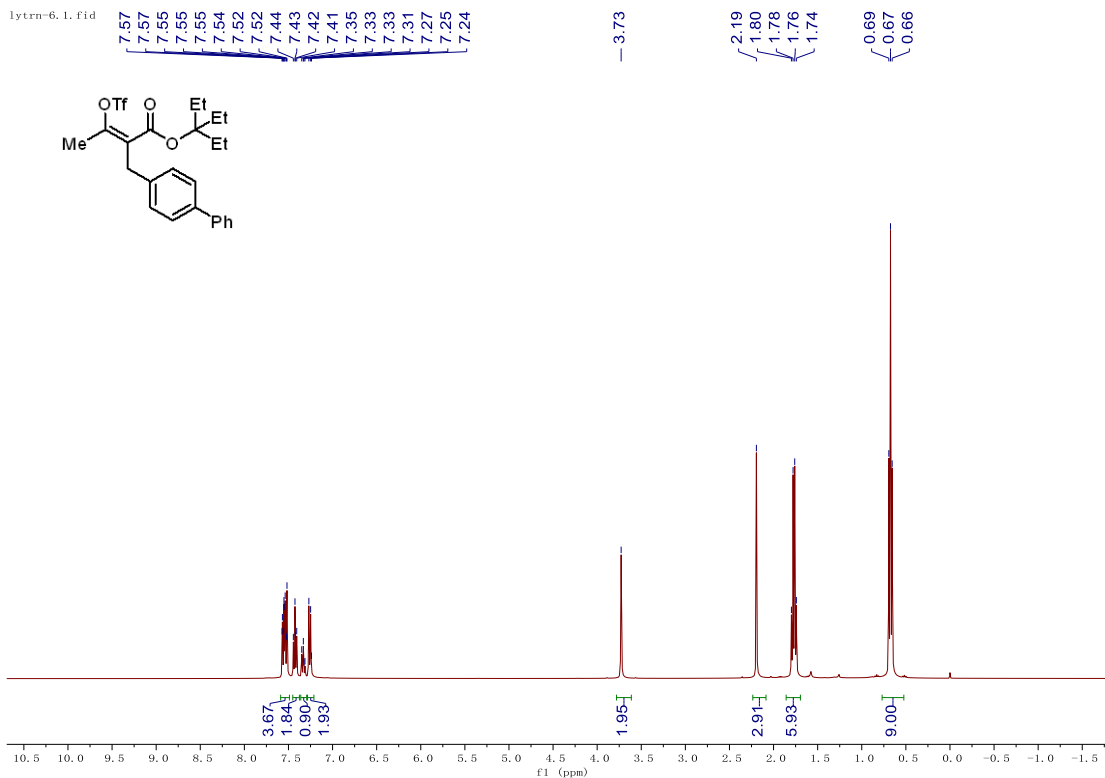

<sup>1</sup>H NMR spectrum for compound **2m**

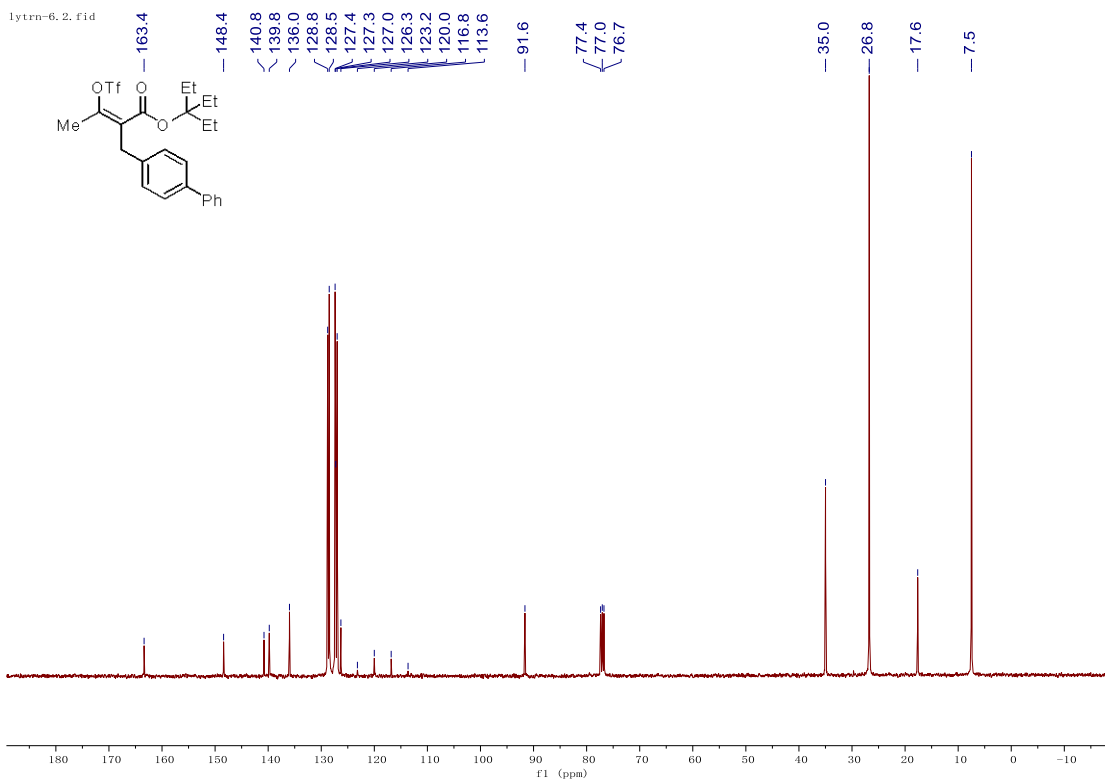

<sup>13</sup>C NMR spectrum for compound **2m**

lytrn-6.3.fid

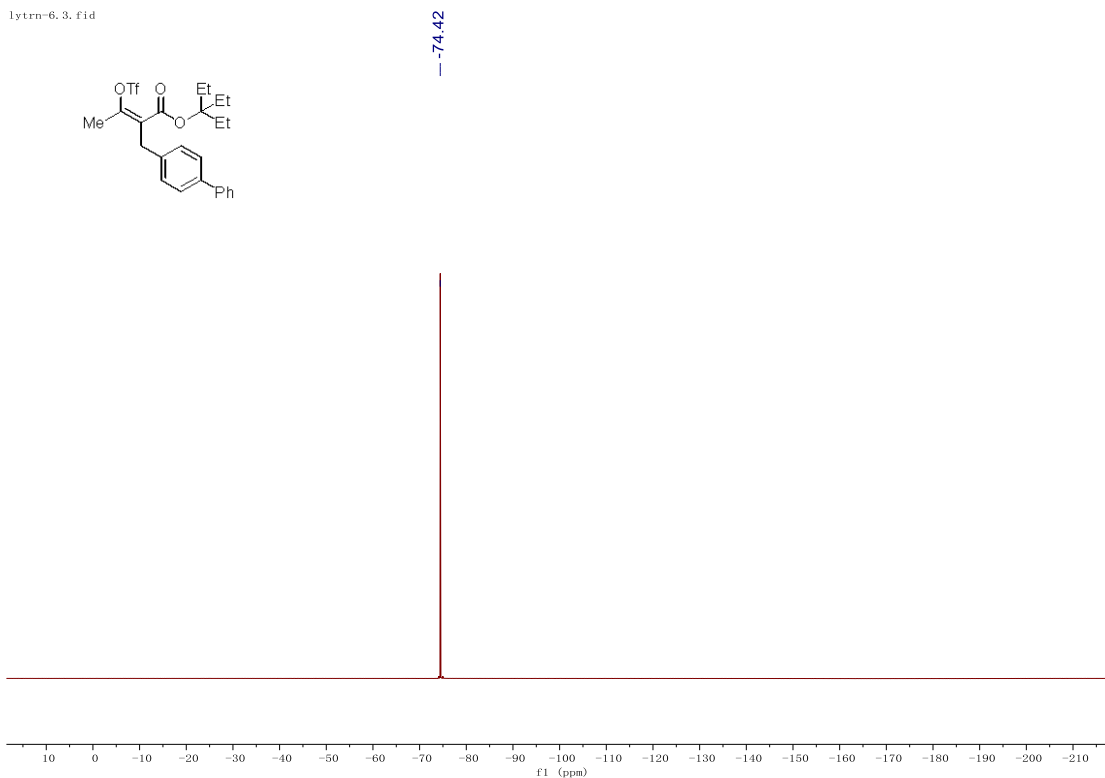

<sup>19</sup>F NMR spectrum for compound **2m**

lytrn-5.1.fid

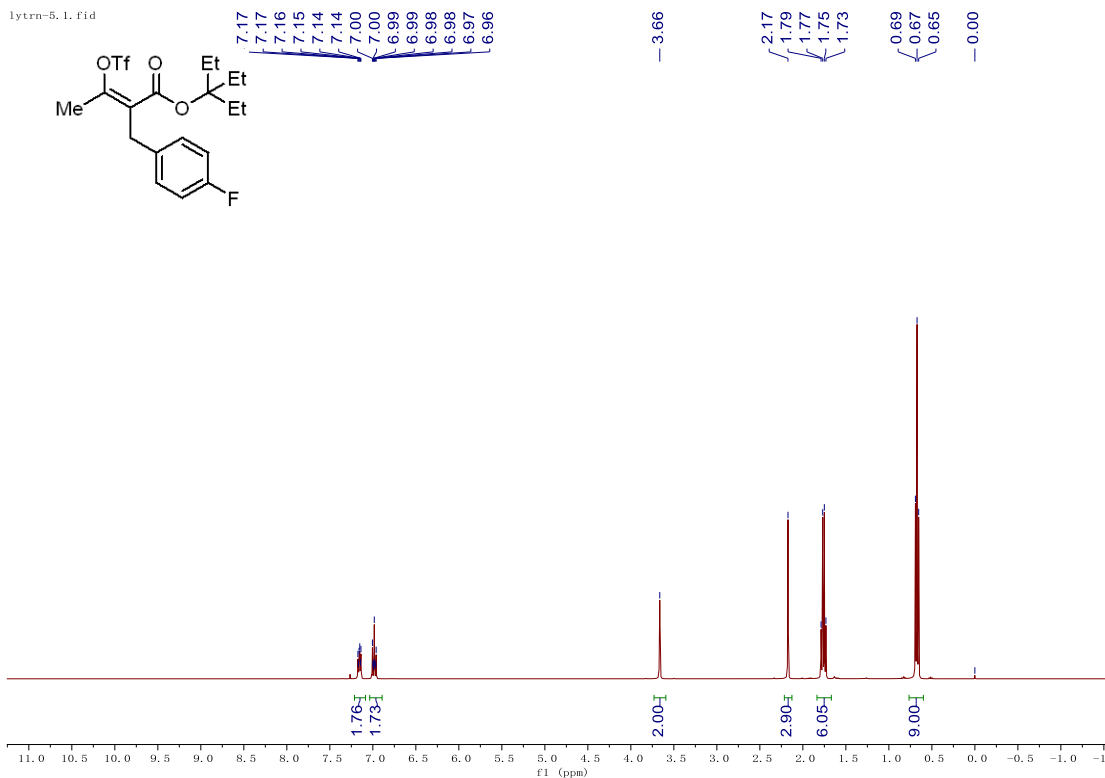

<sup>1</sup>H NMR spectrum for compound **2n**

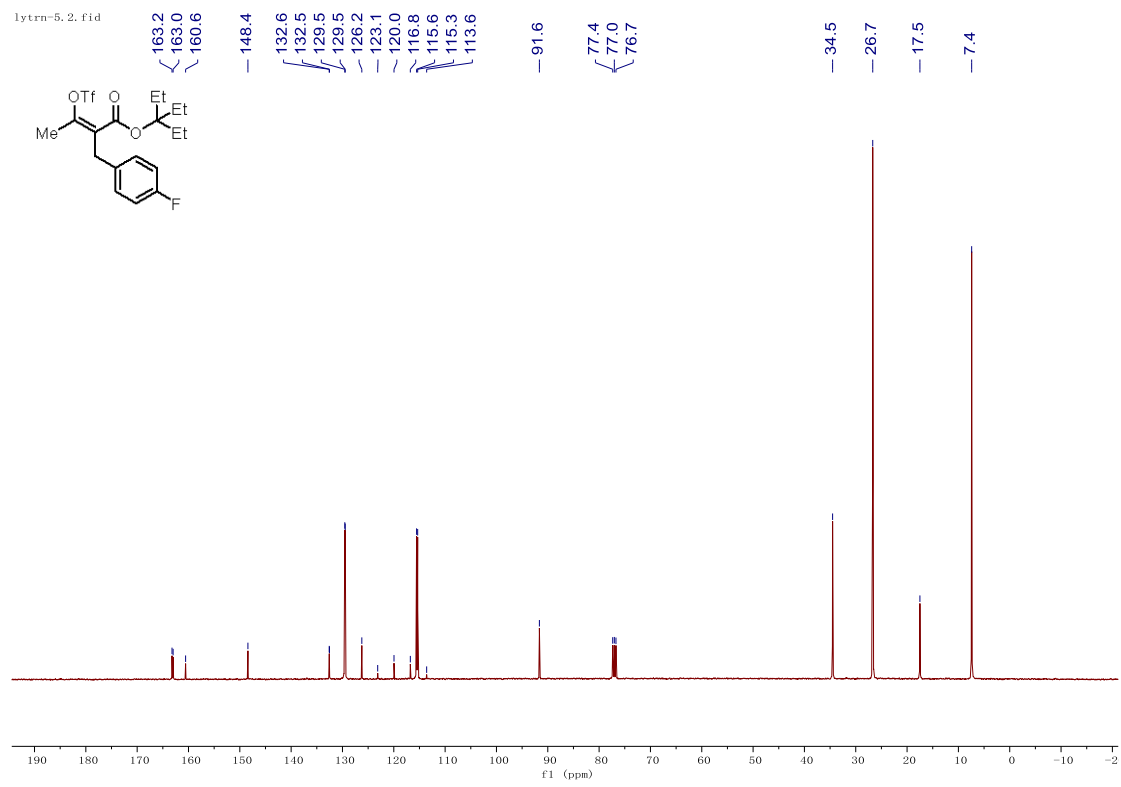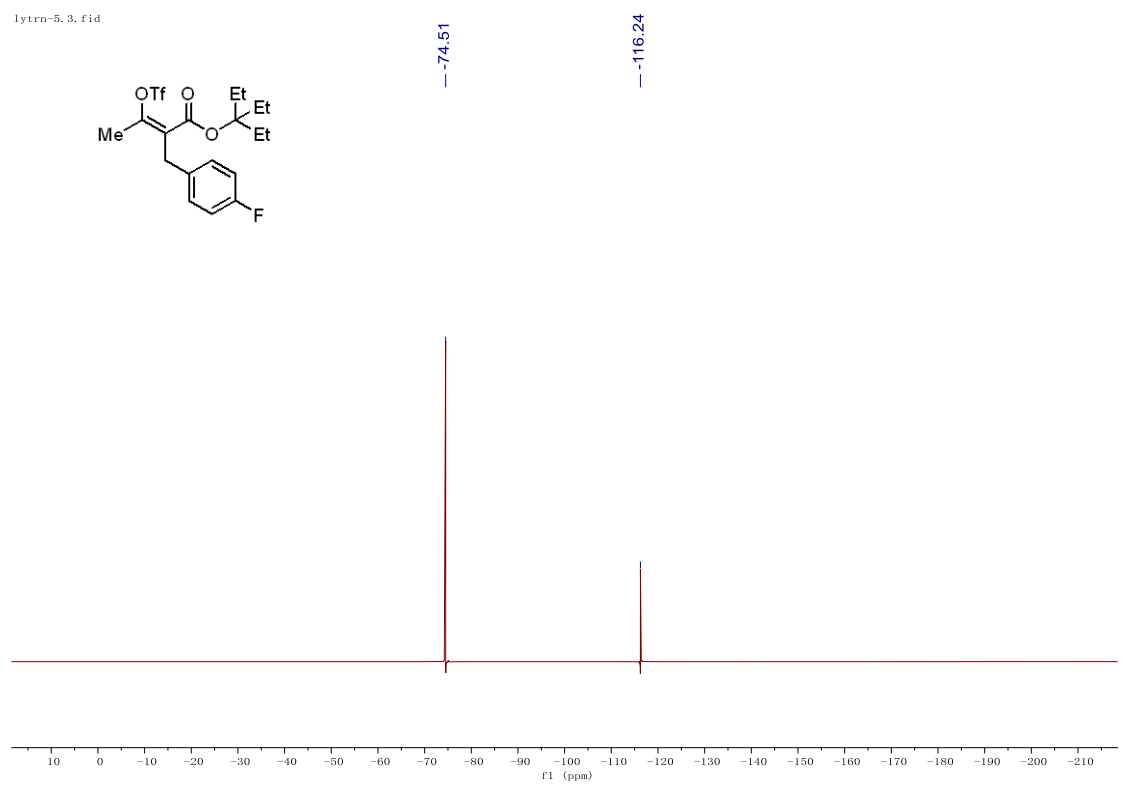

lytrn-55.1.fid

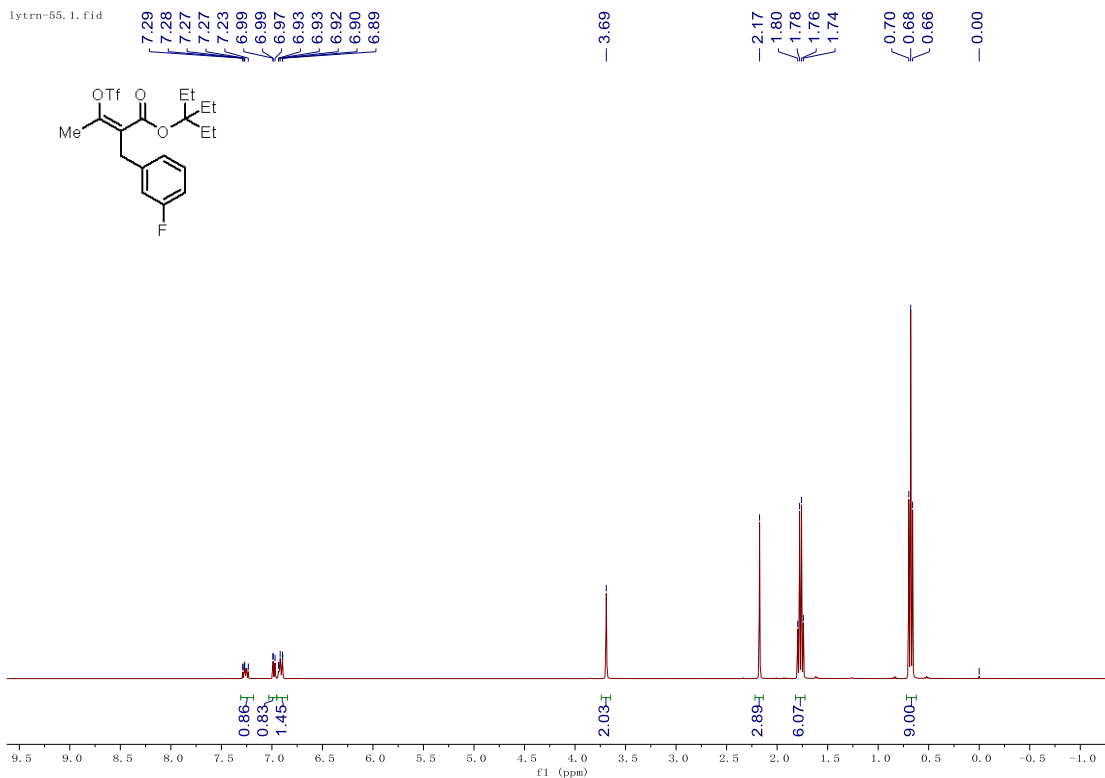

### <sup>1</sup>H NMR spectrum for compound **2o**

lytrn-55.2.fid

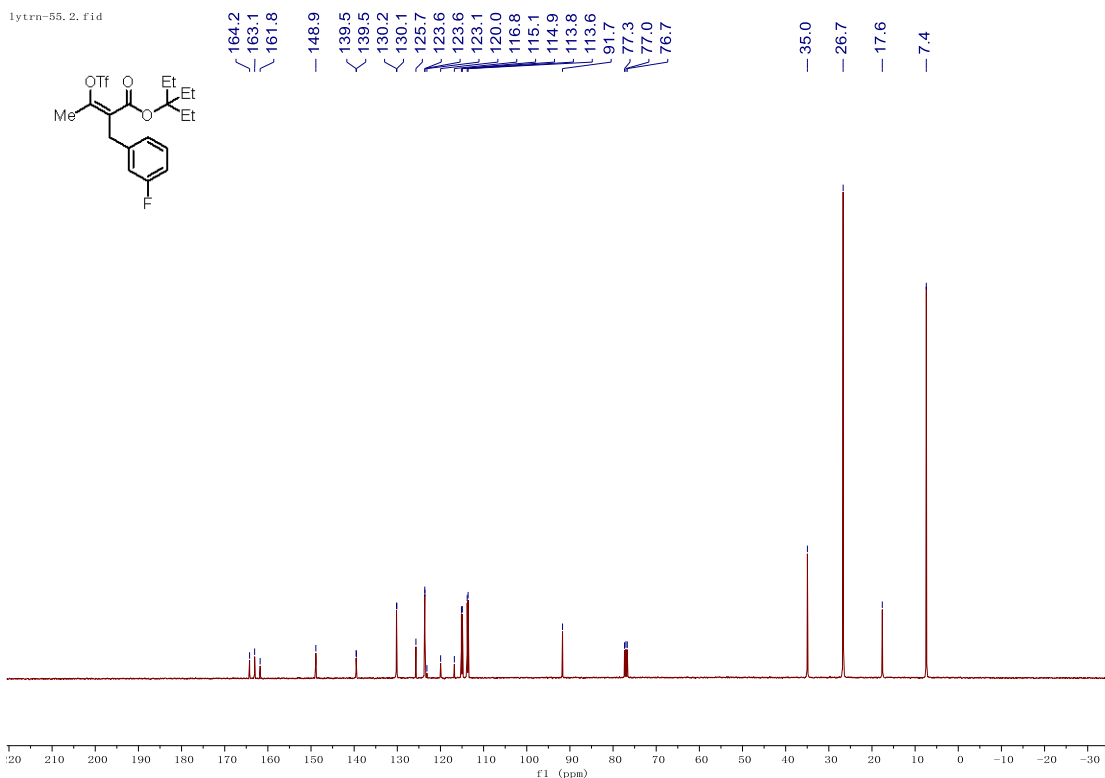

### <sup>13</sup>C NMR spectrum for compound **2o**



lytrn-55.3.fid

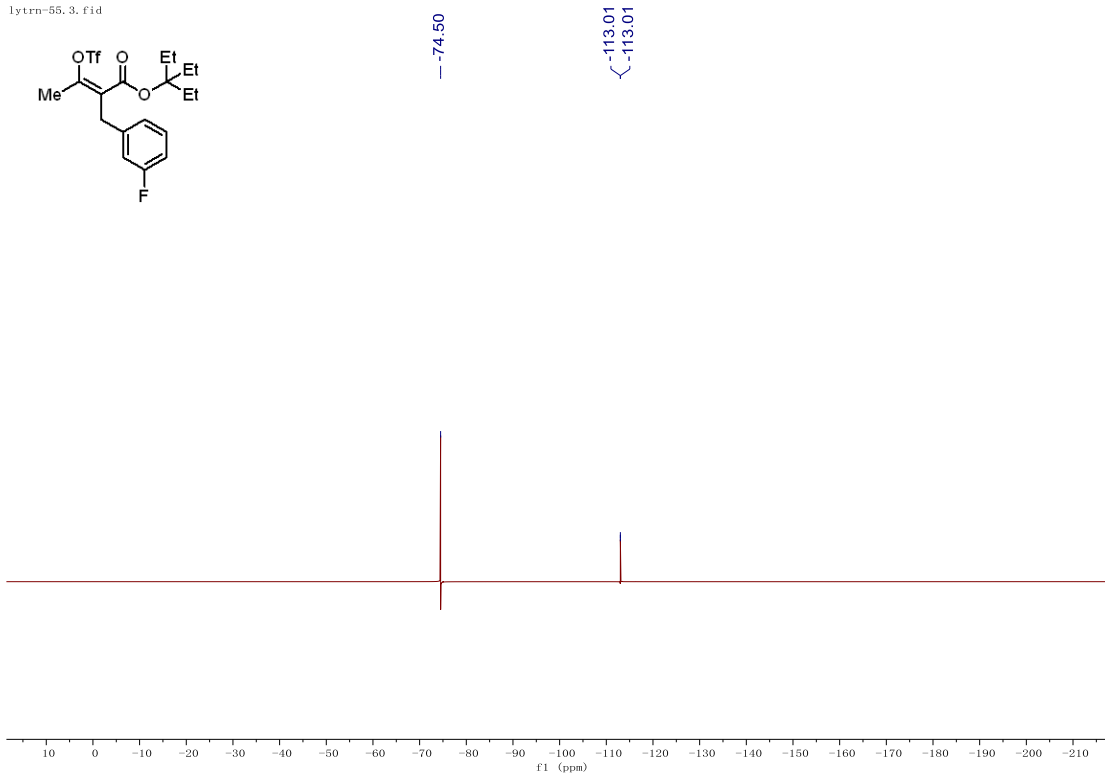

$^{19}\text{F}$  NMR spectrum for compound **2o**

lyt3rn-1.13.fid

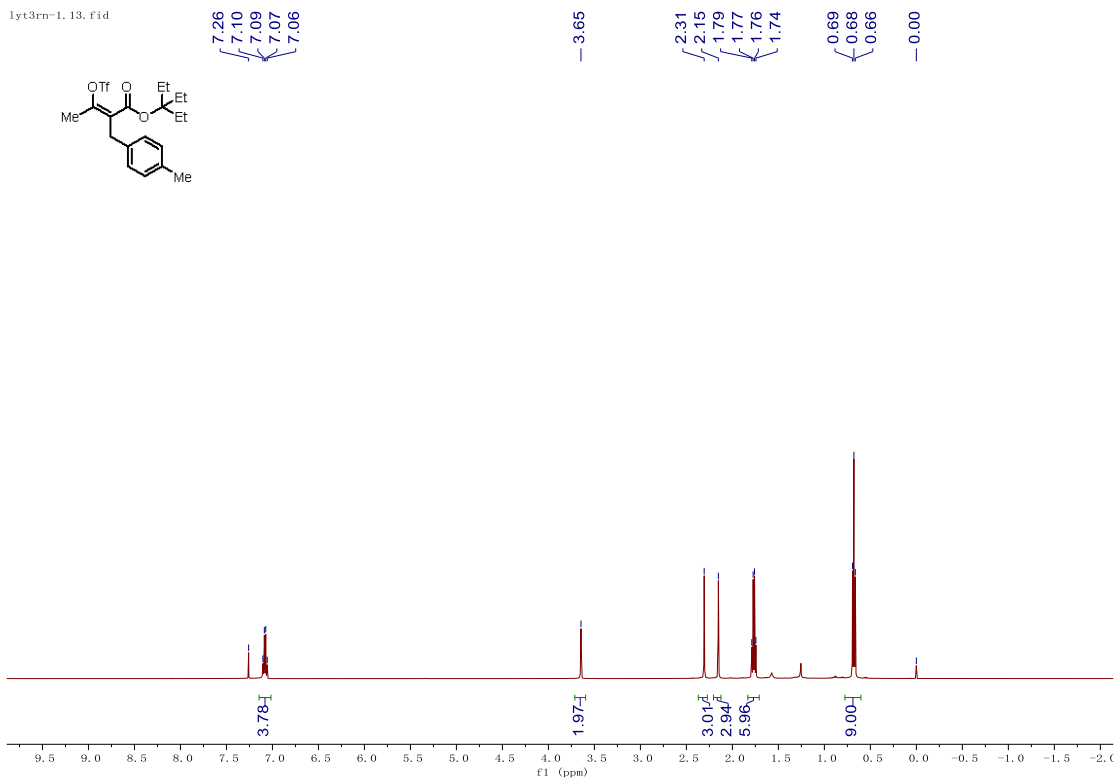

$^1\text{H}$  NMR spectrum for compound **2p**

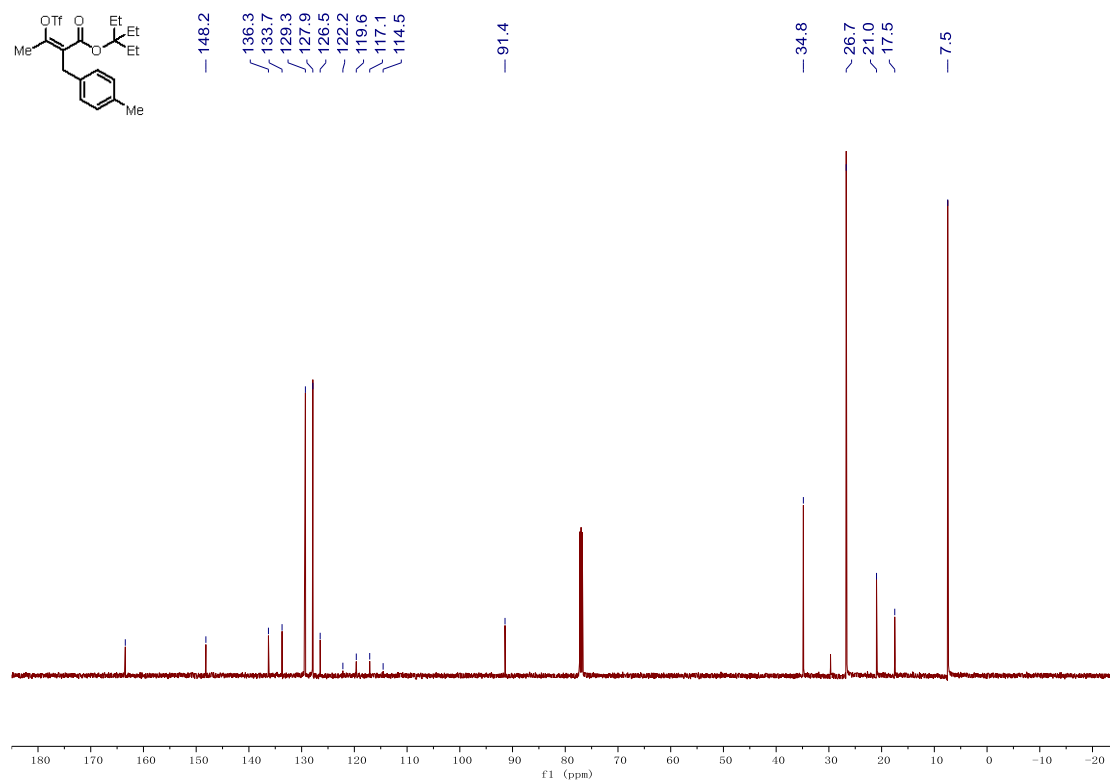

$^{13}\text{C}$  NMR spectrum for compound **2p**

lyt3rn-1.14.fid

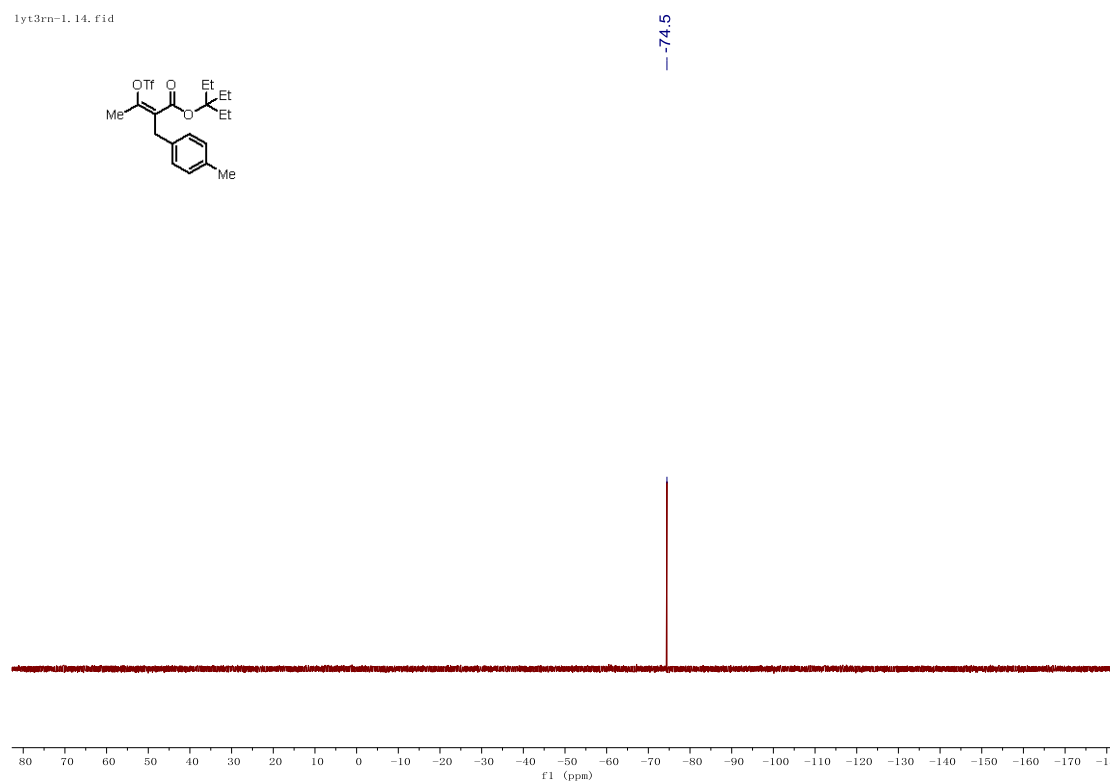

$^{19}\text{F}$  NMR spectrum for compound **2p**

lytrn-8.2.1.fid

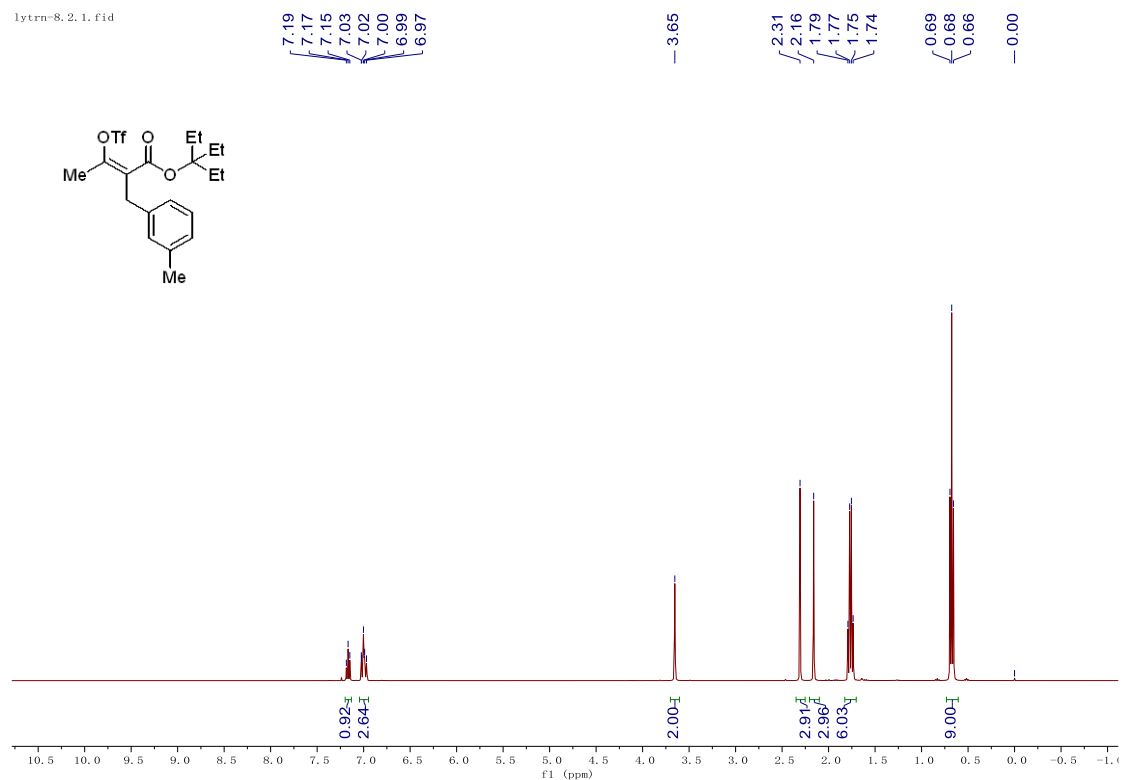

<sup>1</sup>H NMR spectrum for compound **2q**

lytrn-8.2.2.fid

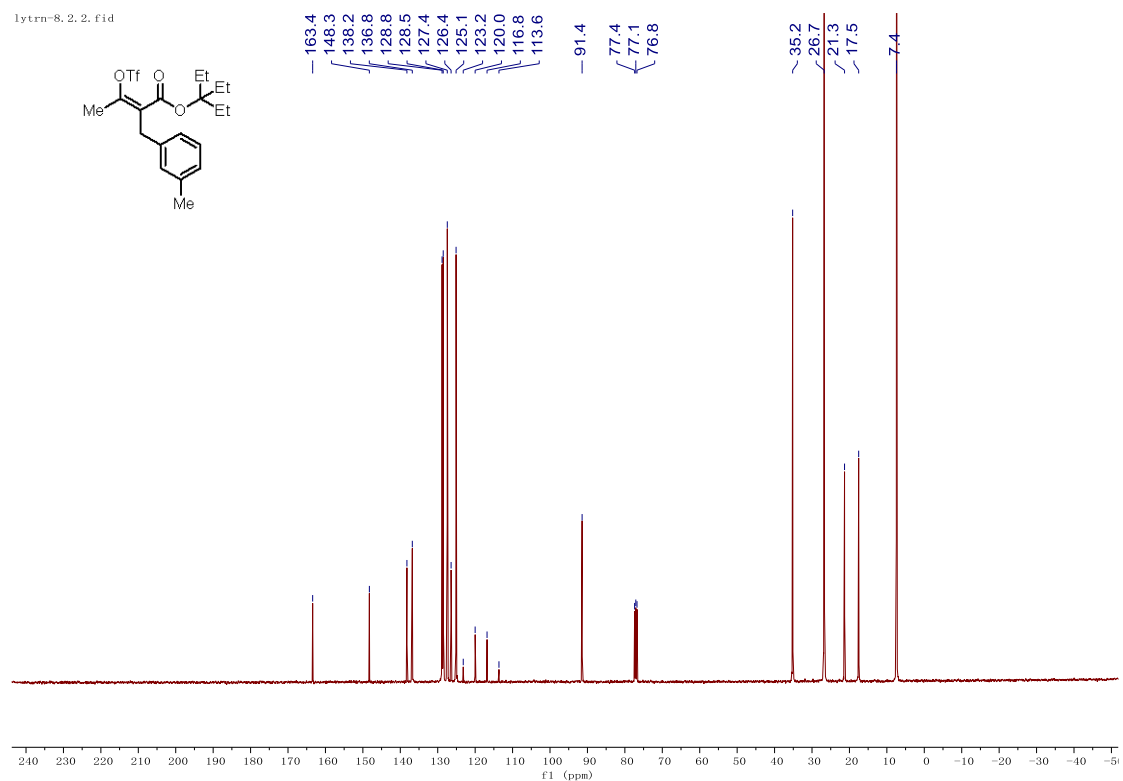

<sup>13</sup>C NMR spectrum for compound **2q**

lytrn-8.2.3.fid

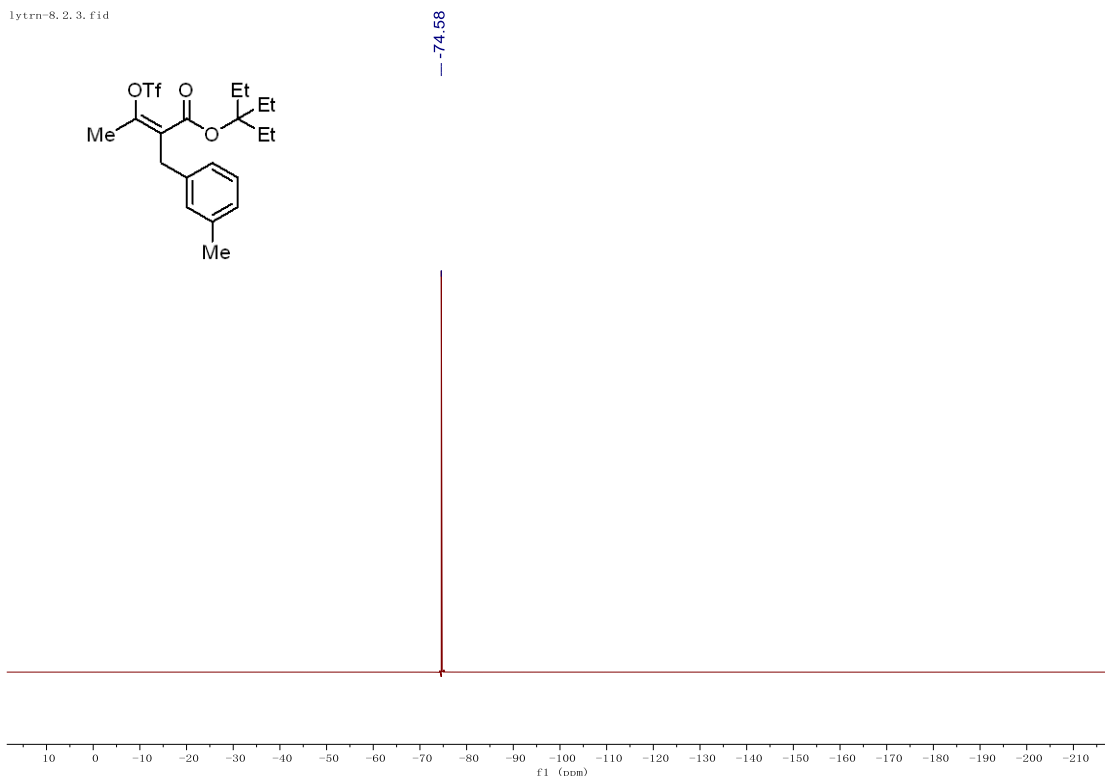

<sup>19</sup>F NMR spectrum for compound **2q**

lytrn-7.1.fid

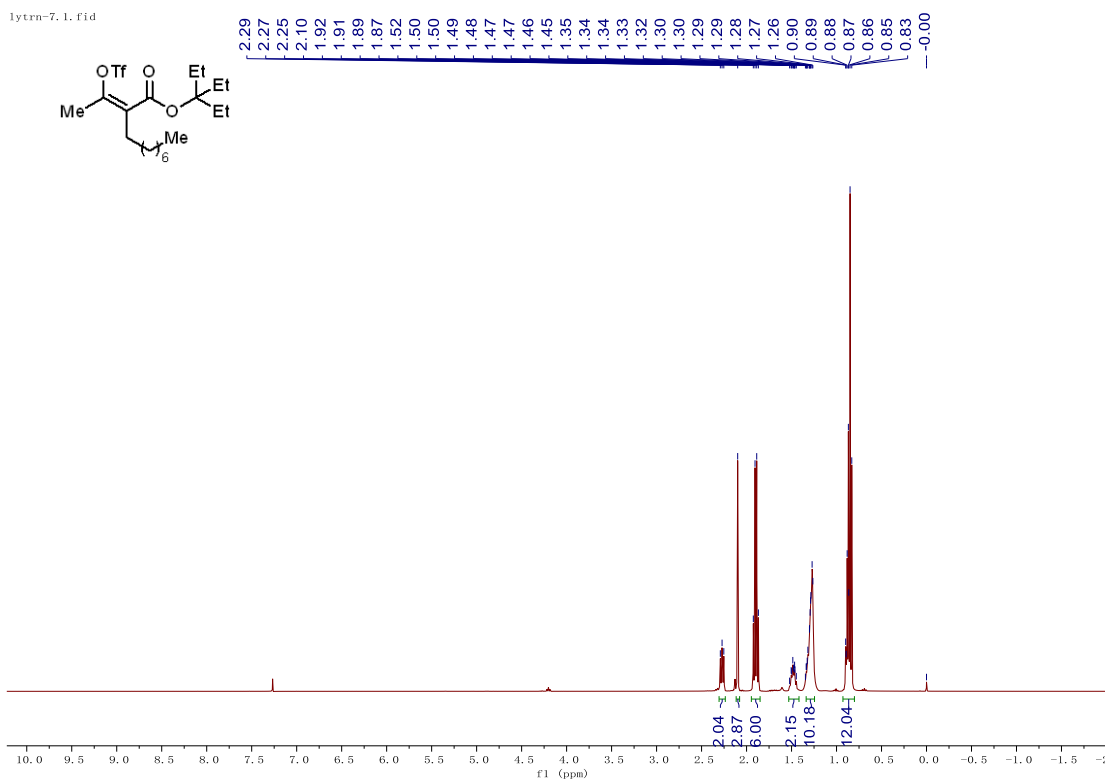

<sup>1</sup>H NMR spectrum for compound **2r**

lytrn-7.2.fid

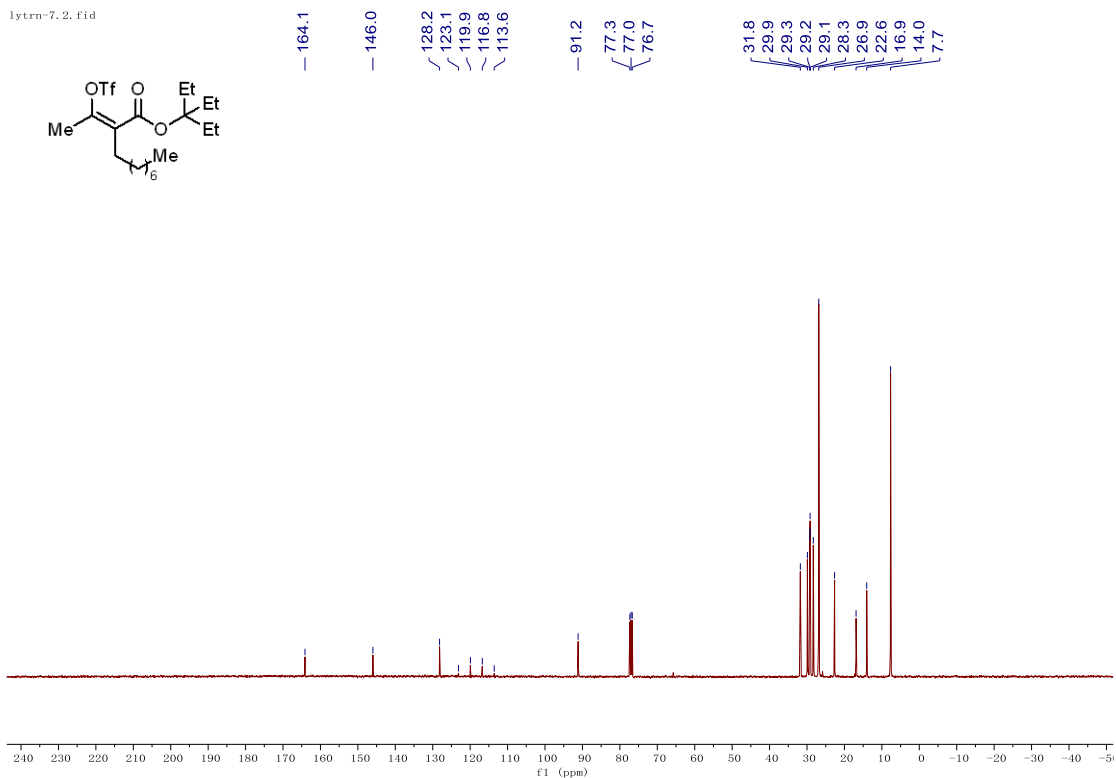

<sup>13</sup>C NMR spectrum for compound **2r**

lytrn-7.3.fid

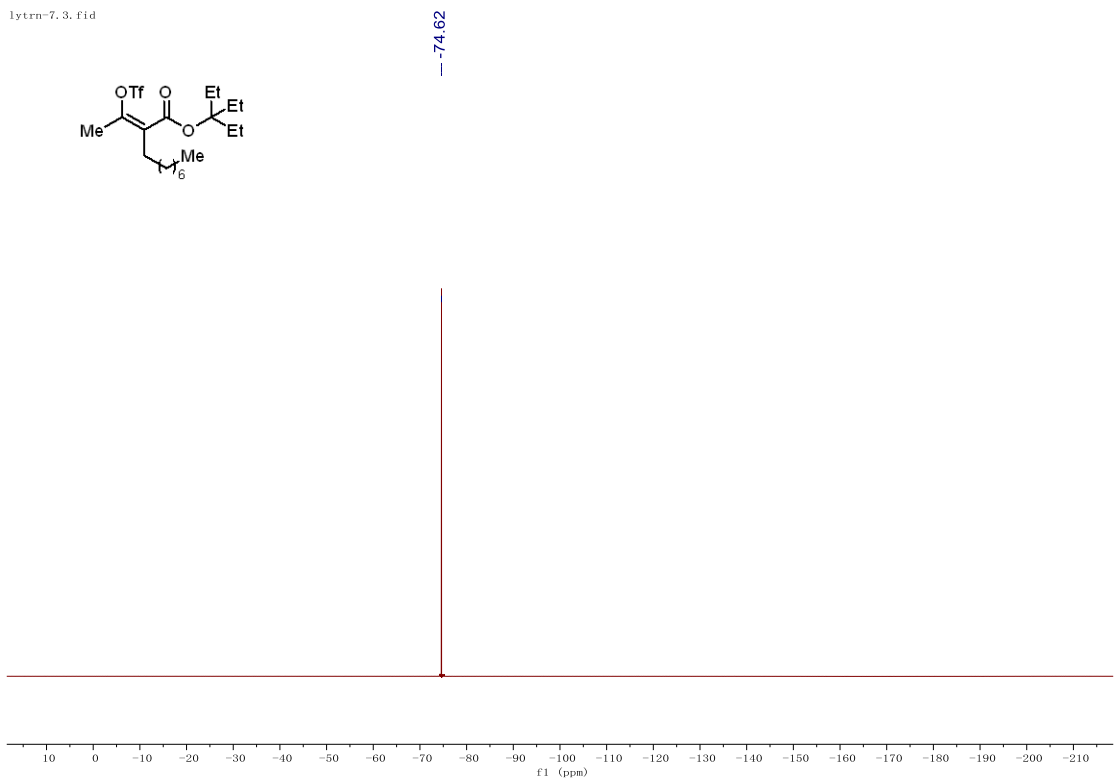

<sup>19</sup>F NMR spectrum for compound **2r**

## 7. NMR spectrum of products

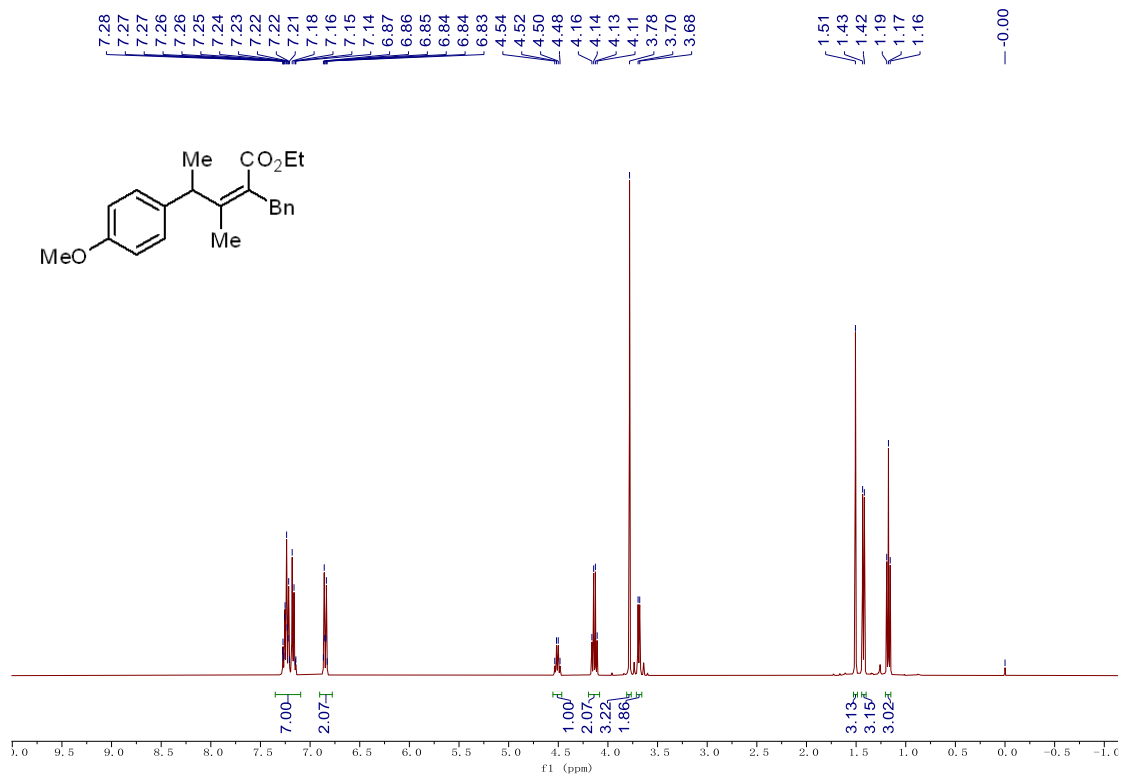

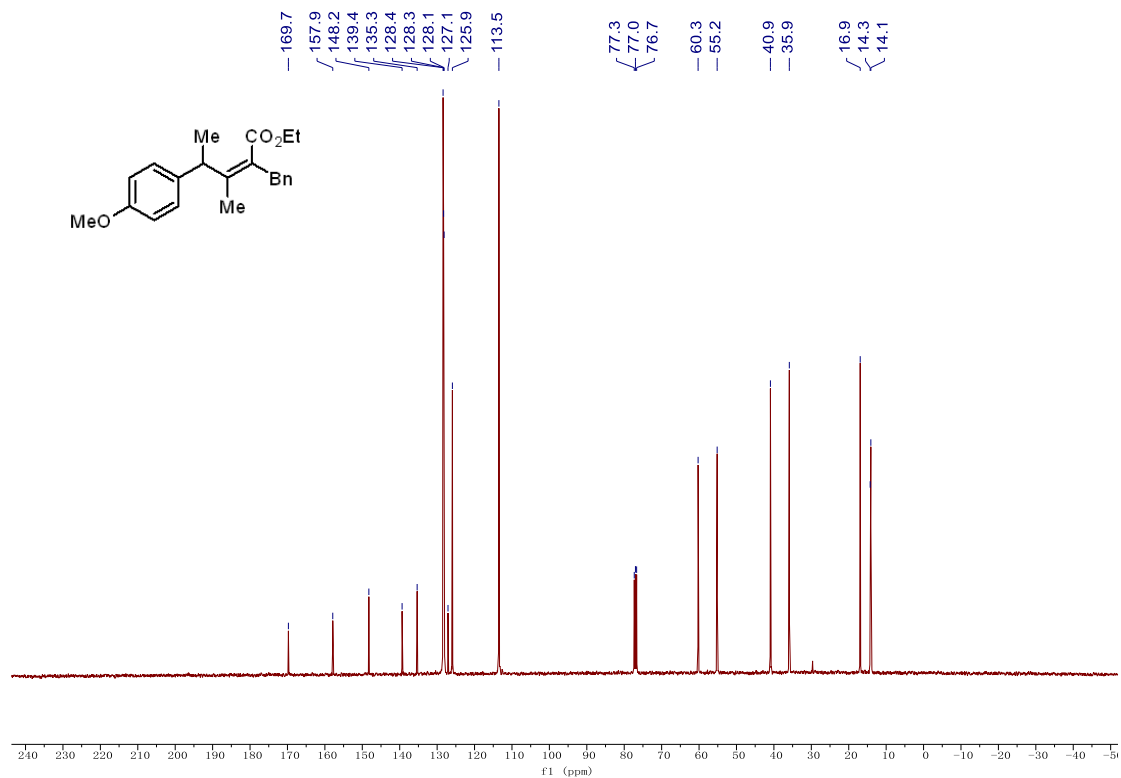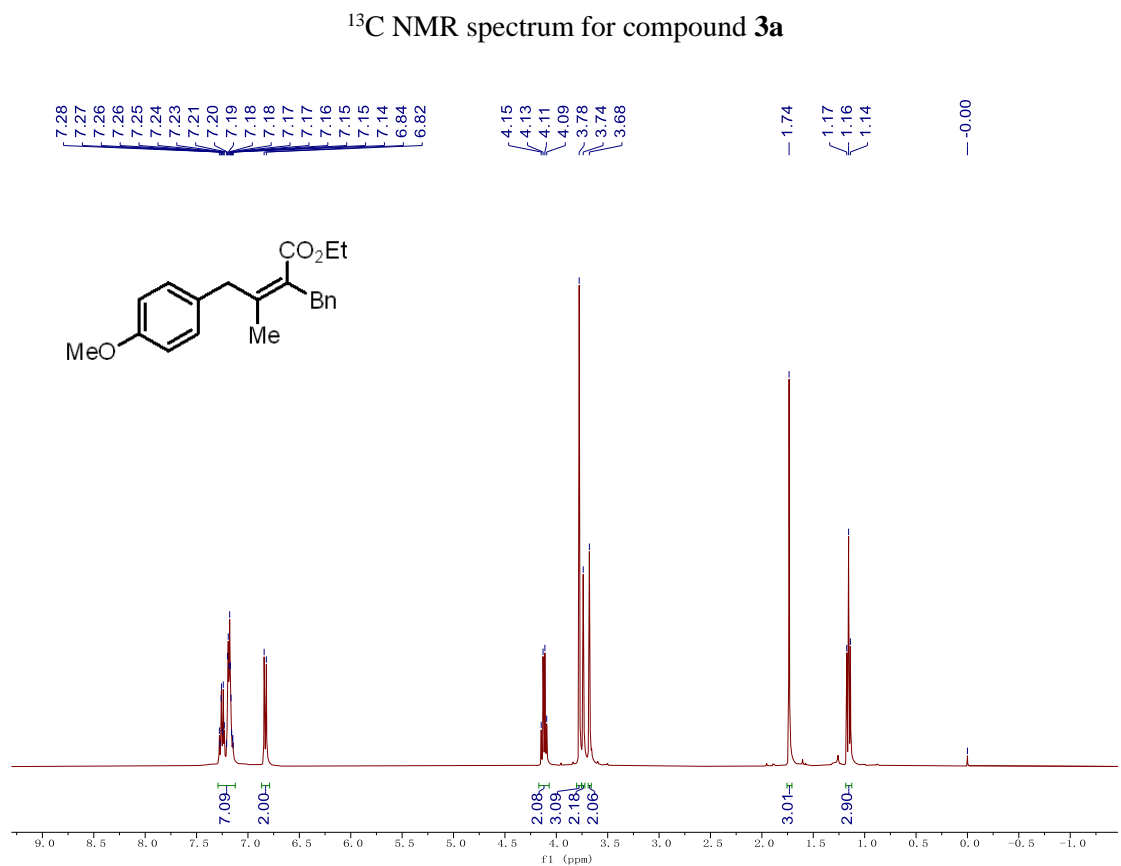

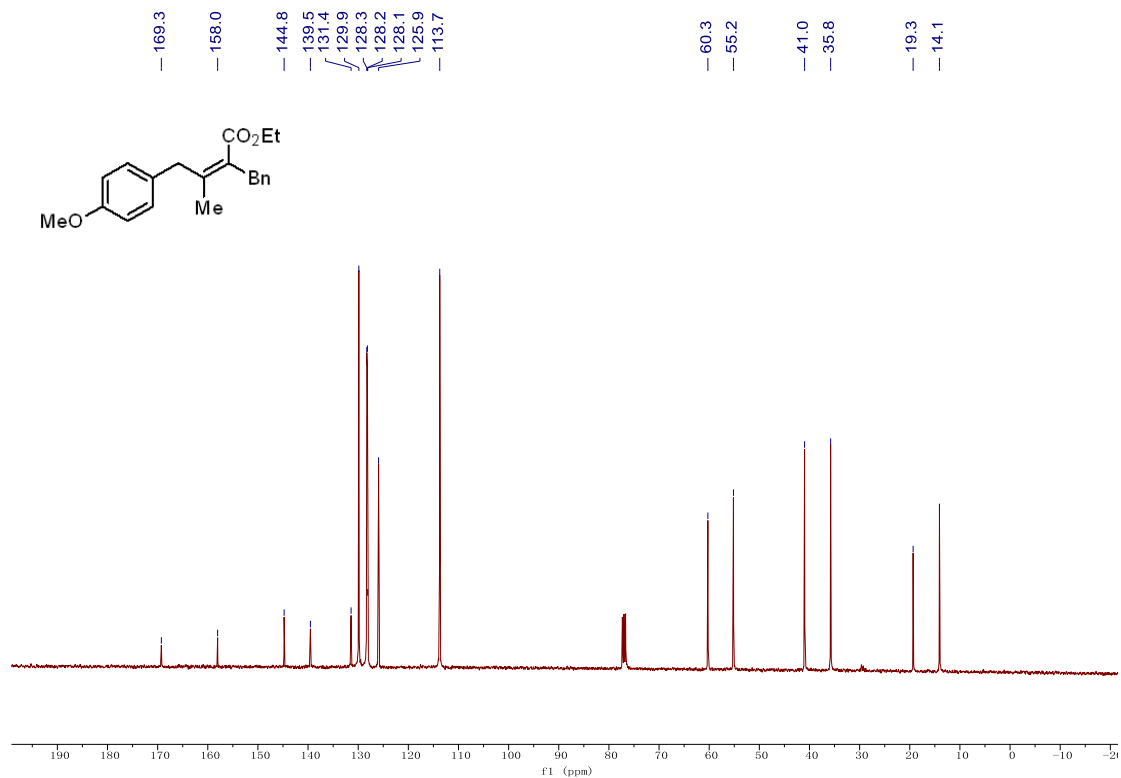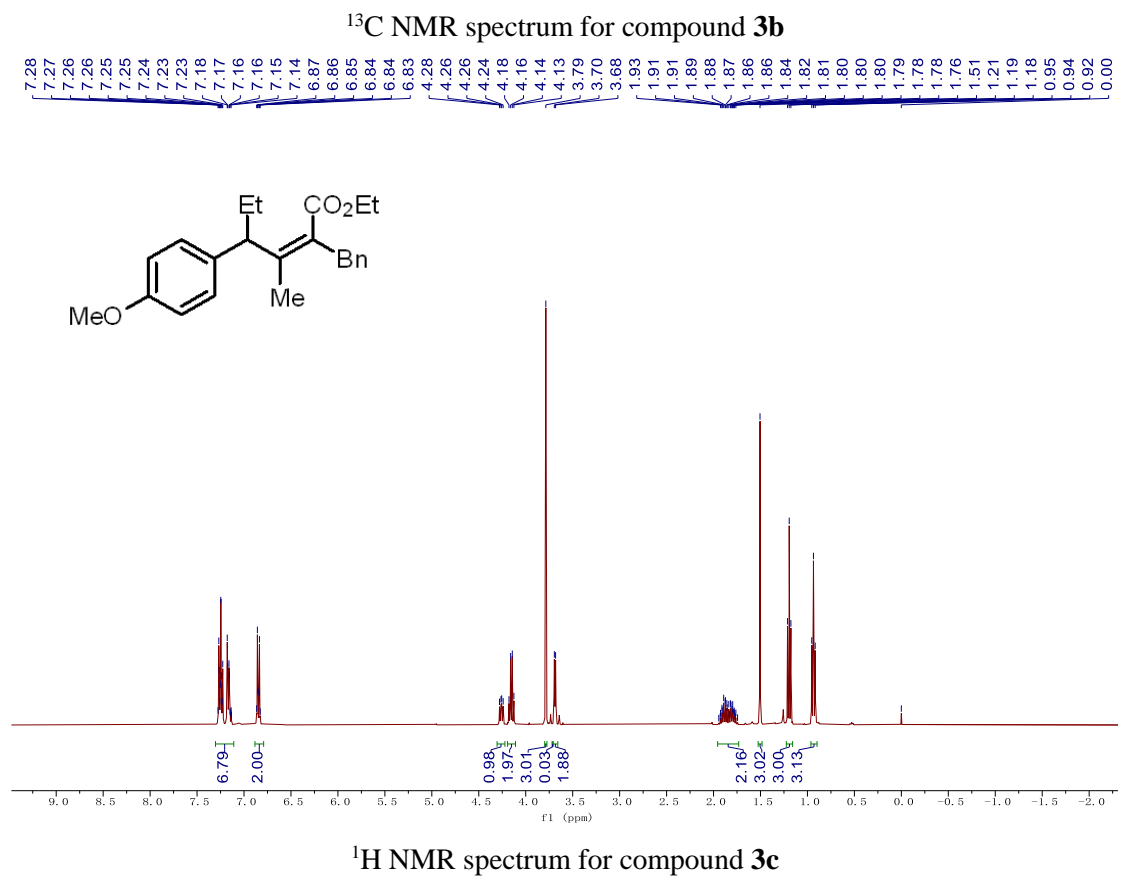



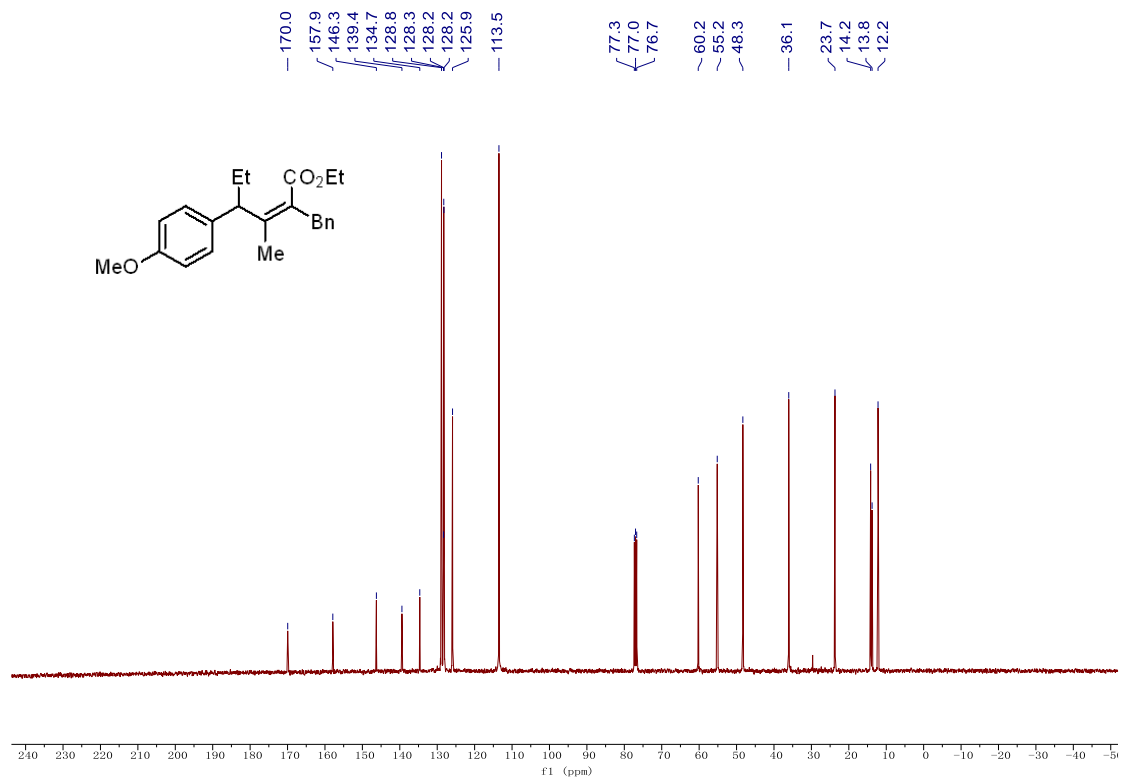

<sup>13</sup>C NMR spectrum for compound 3c

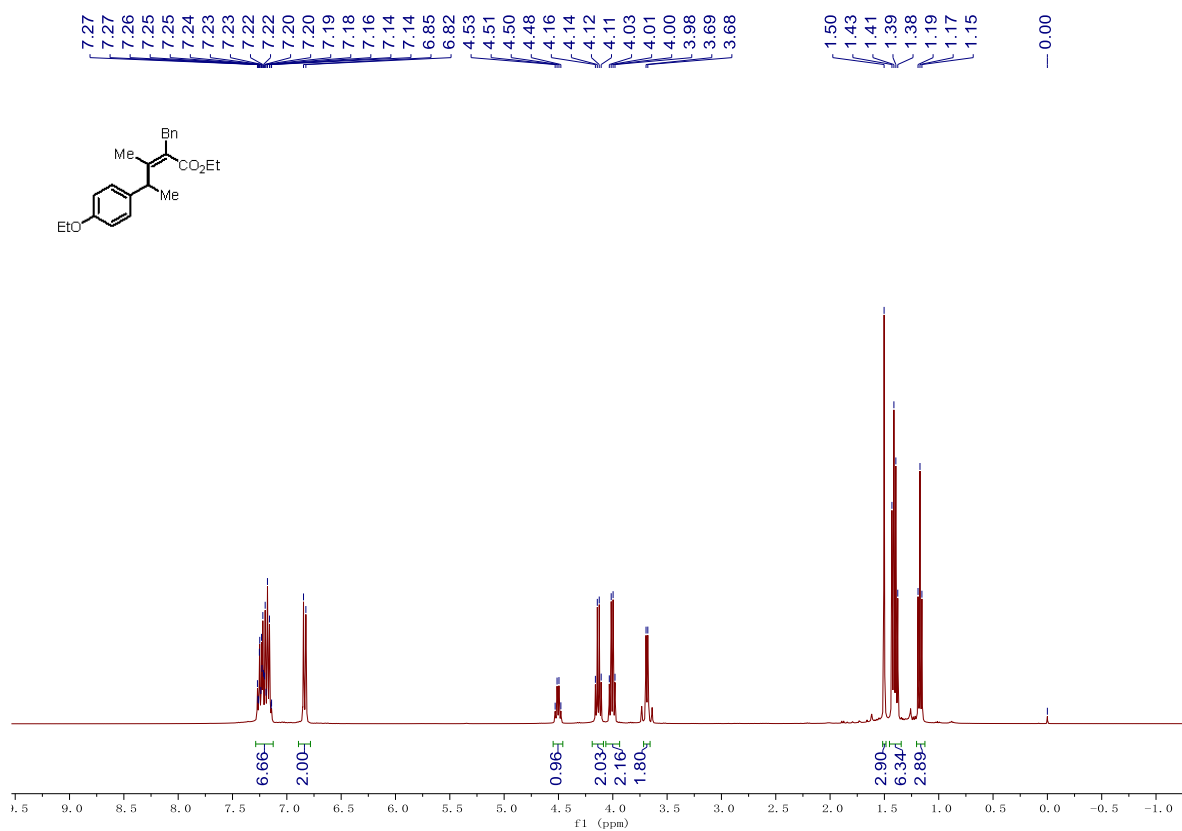

<sup>1</sup>H NMR spectrum for compound 3d

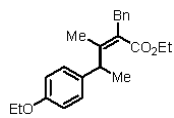

169.75  
 157.25  
 148.32  
 139.37  
 135.19  
 128.39  
 128.26  
 128.13  
 127.04  
 125.91  
 114.07  
 77.32  
 77.00  
 76.68  
 63.30  
 60.24  
 40.94  
 35.87  
 16.91  
 14.84  
 14.27  
 14.09

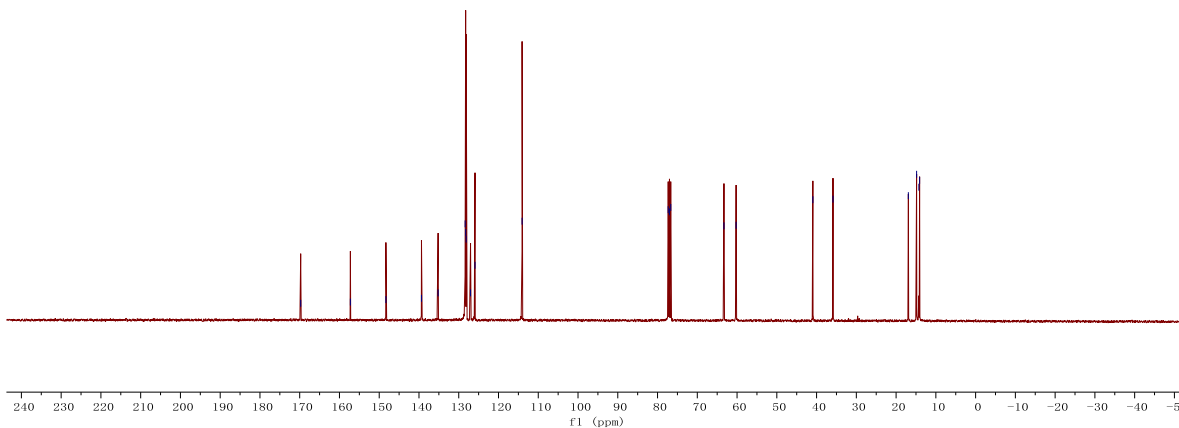

<sup>13</sup>C NMR spectrum for compound **3d**

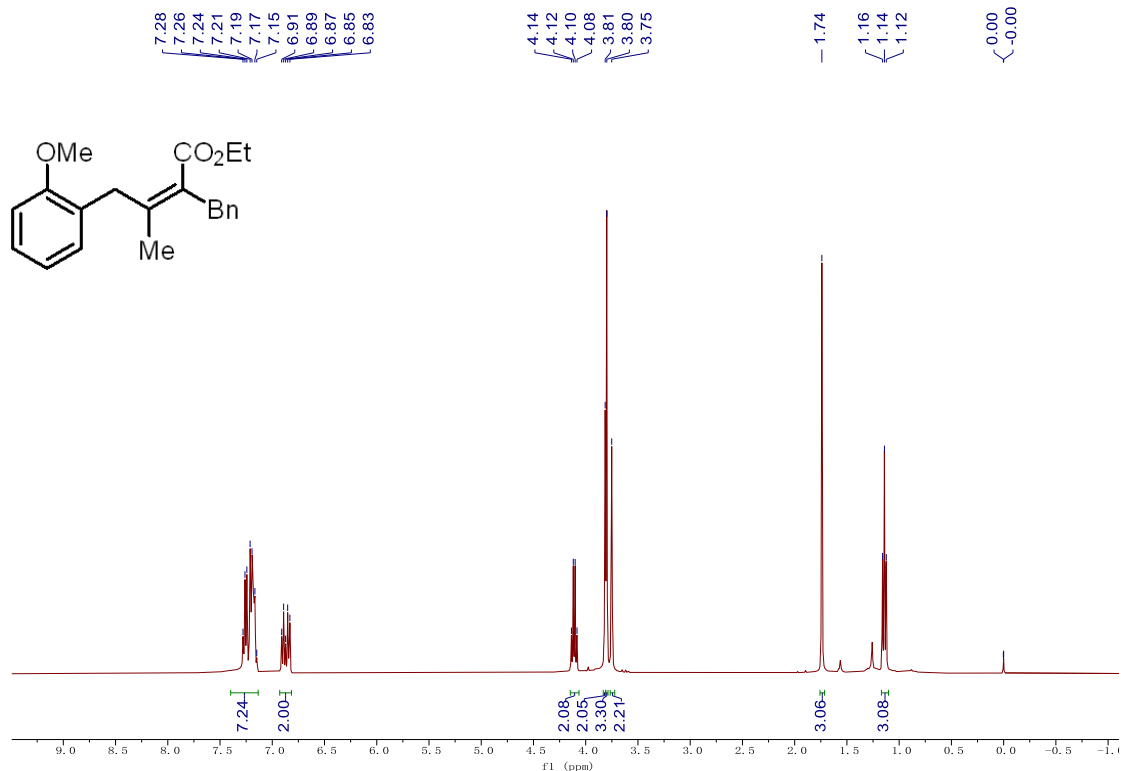

<sup>1</sup>H NMR spectrum for compound **3e**

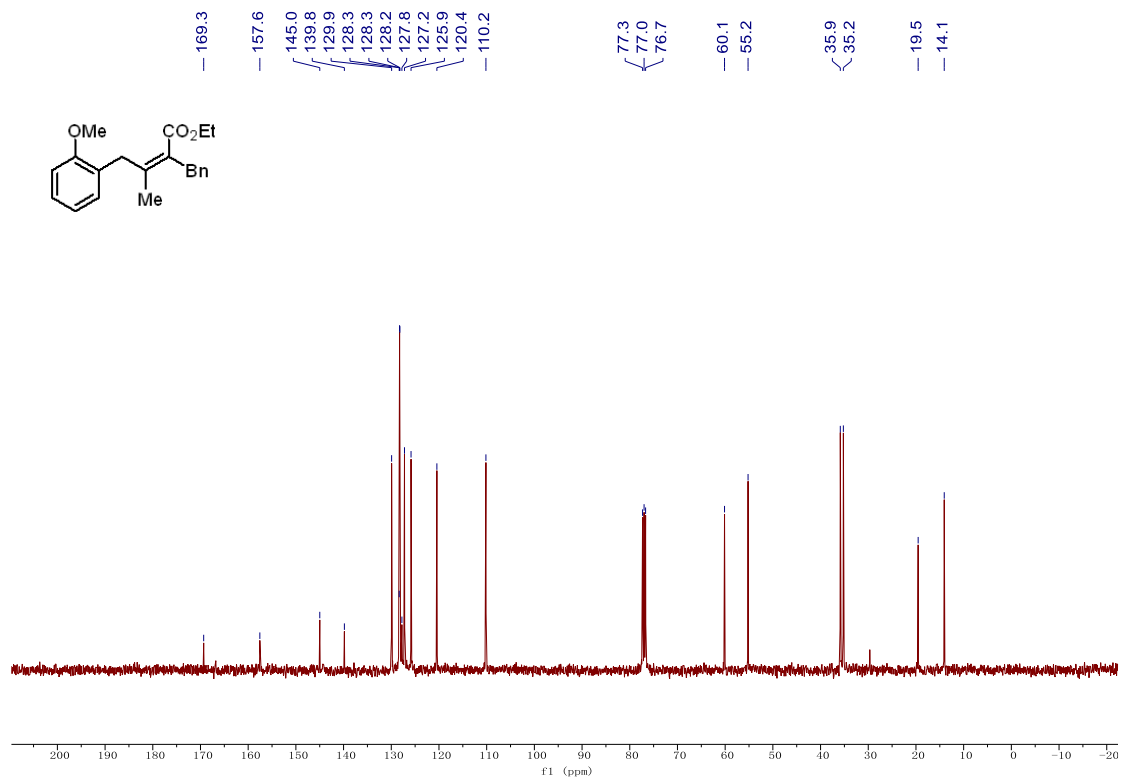

<sup>13</sup>C NMR spectrum for compound **3e**

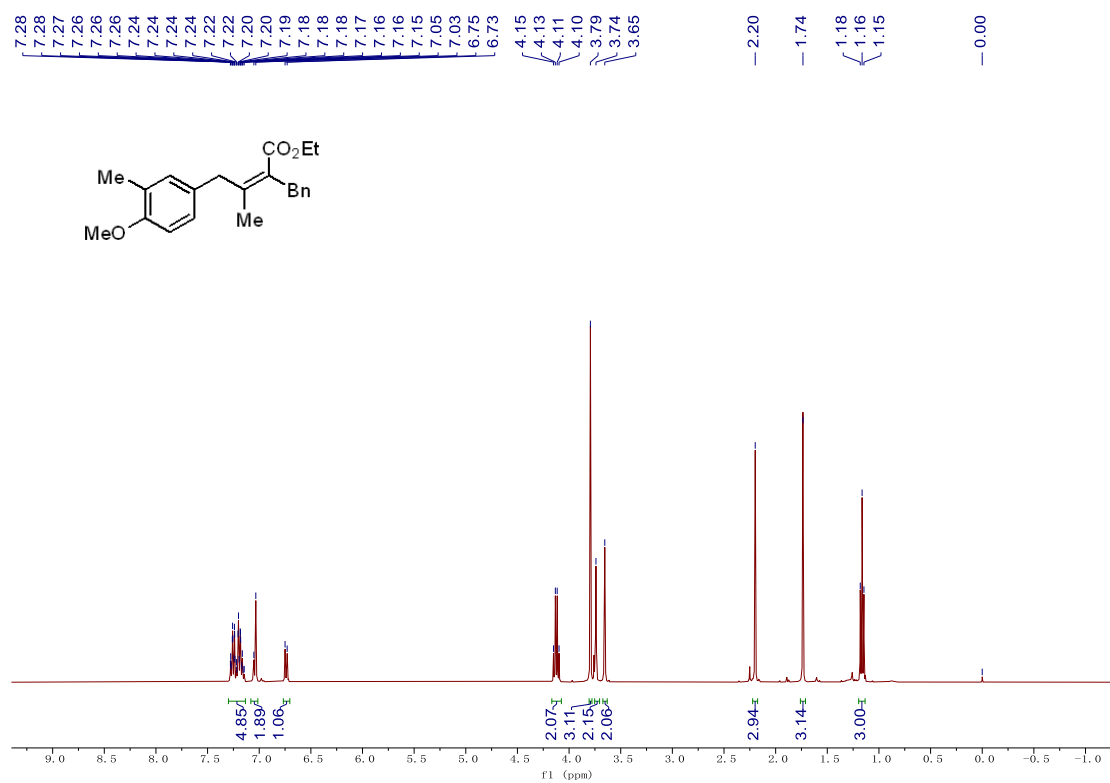

<sup>1</sup>H NMR spectrum for compound **3f**

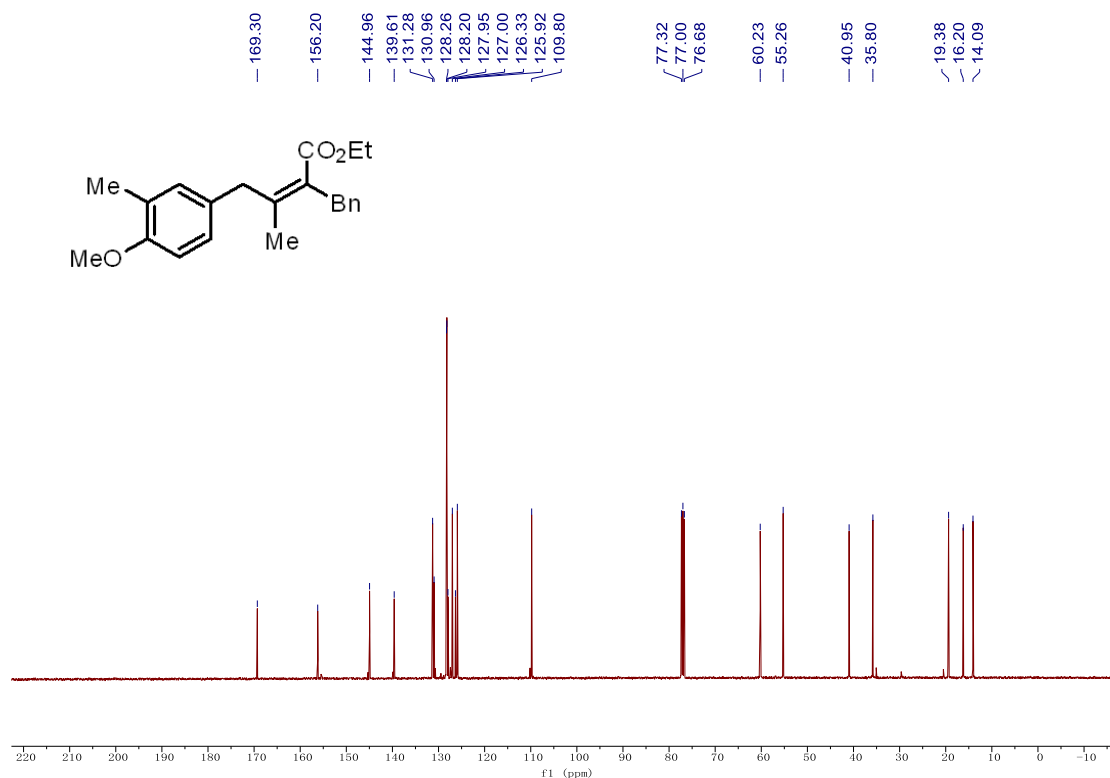

<sup>13</sup>C NMR spectrum for compound **3f**

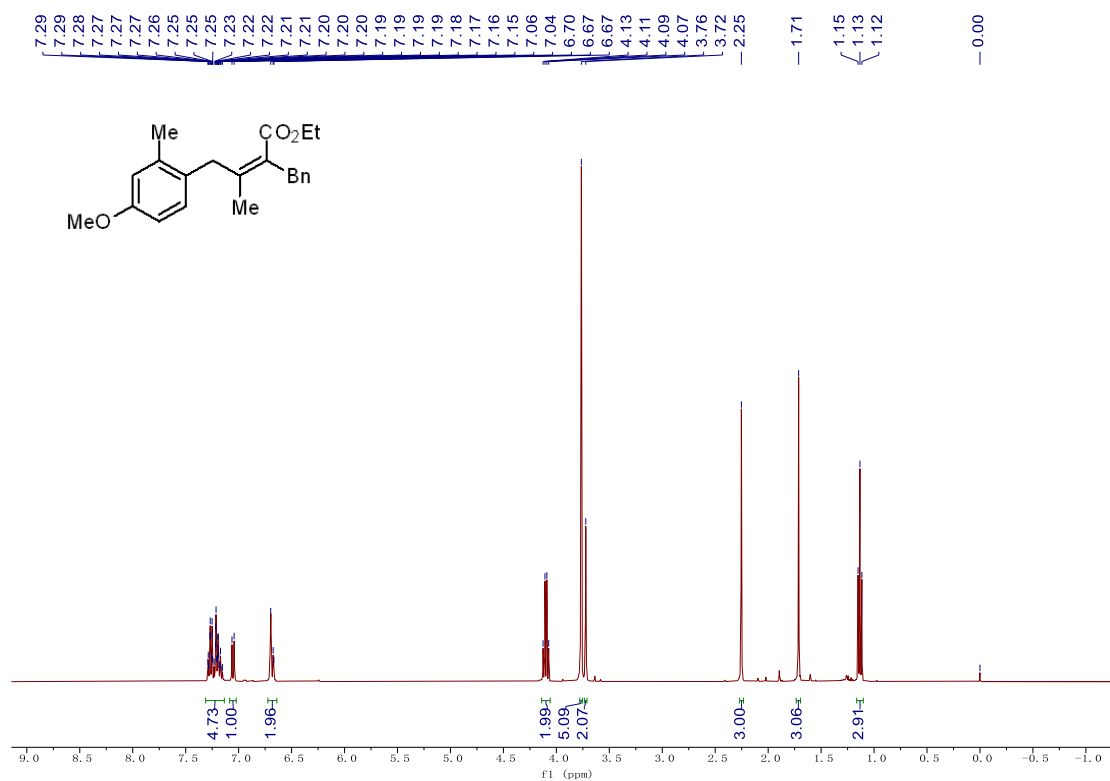

<sup>1</sup>H NMR spectrum for compound **3g**

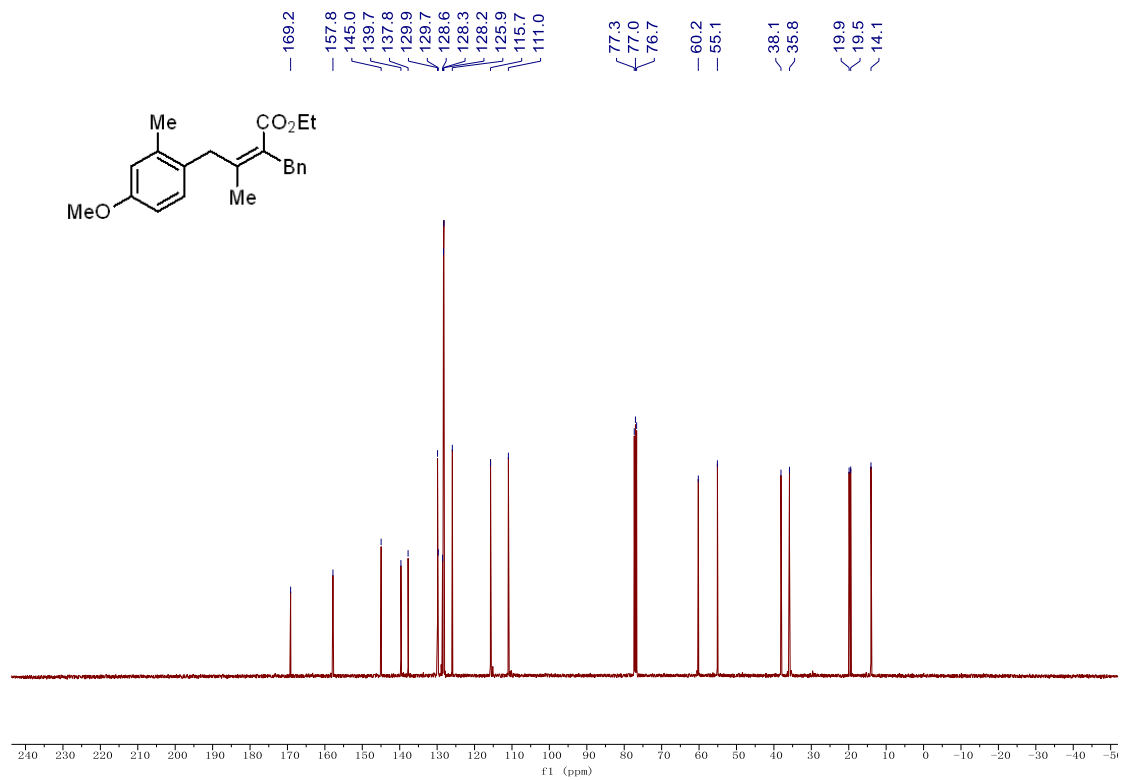

<sup>13</sup>C NMR spectrum for compound **3g**

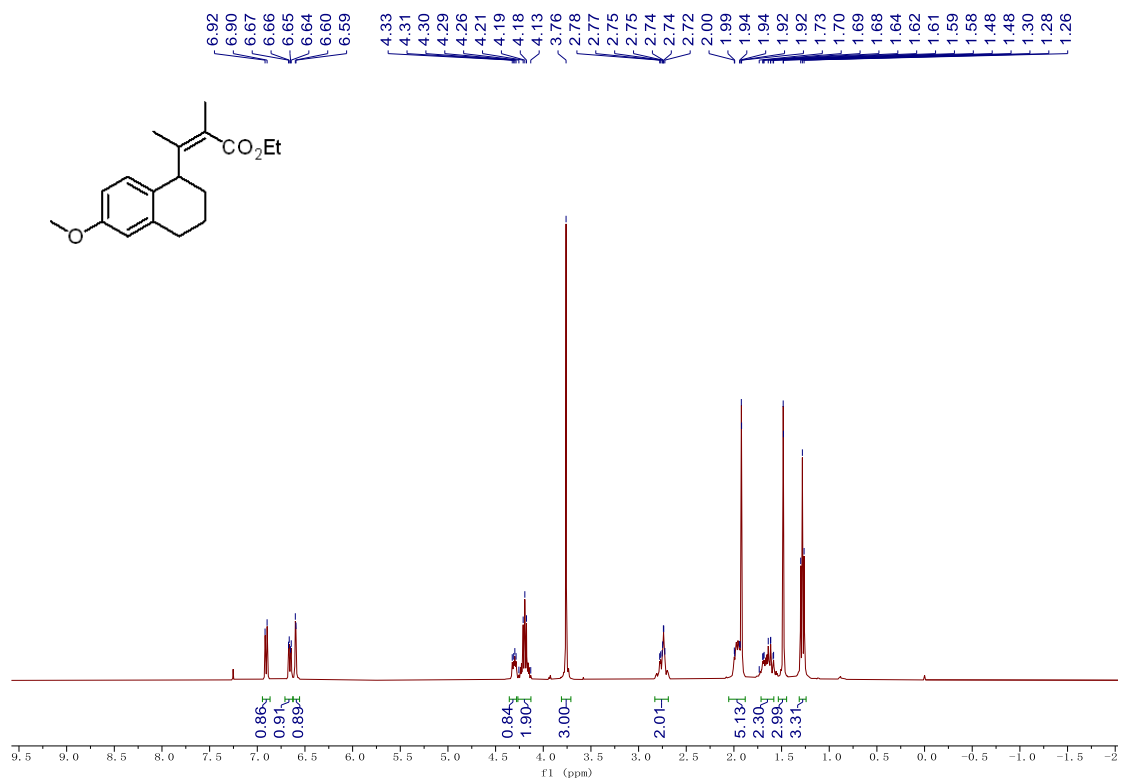

<sup>1</sup>H NMR spectrum for compound **3h**

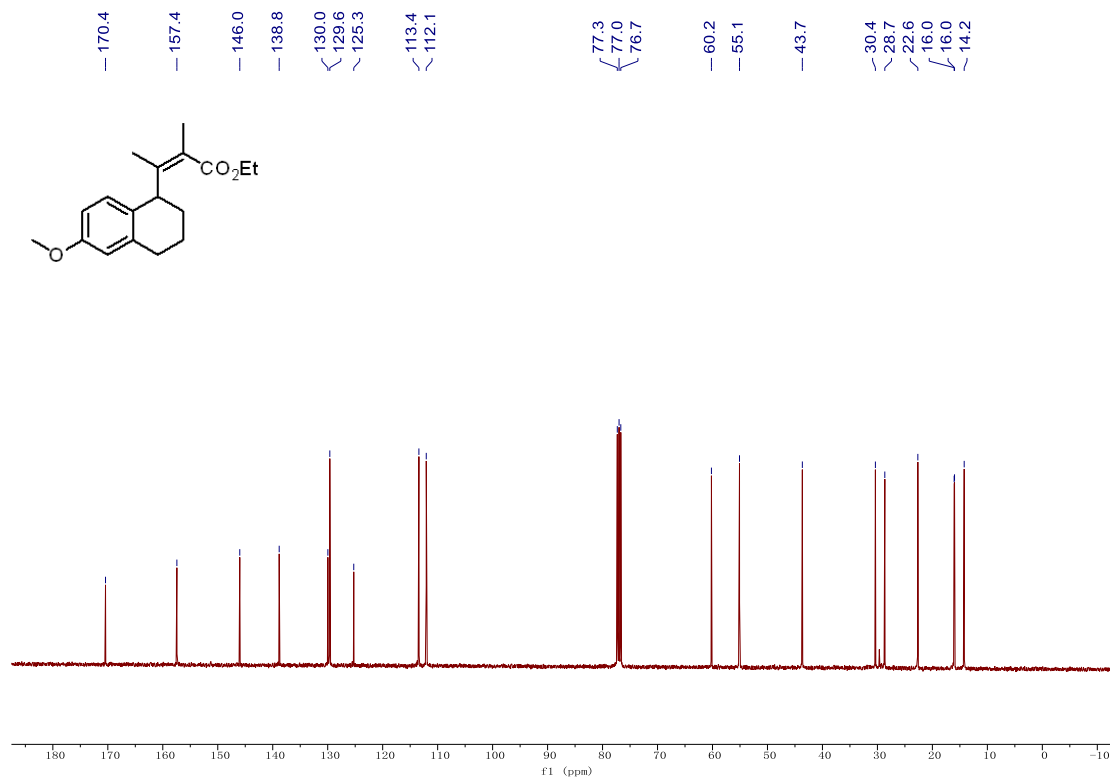

<sup>13</sup>C NMR spectrum for compound **3h**

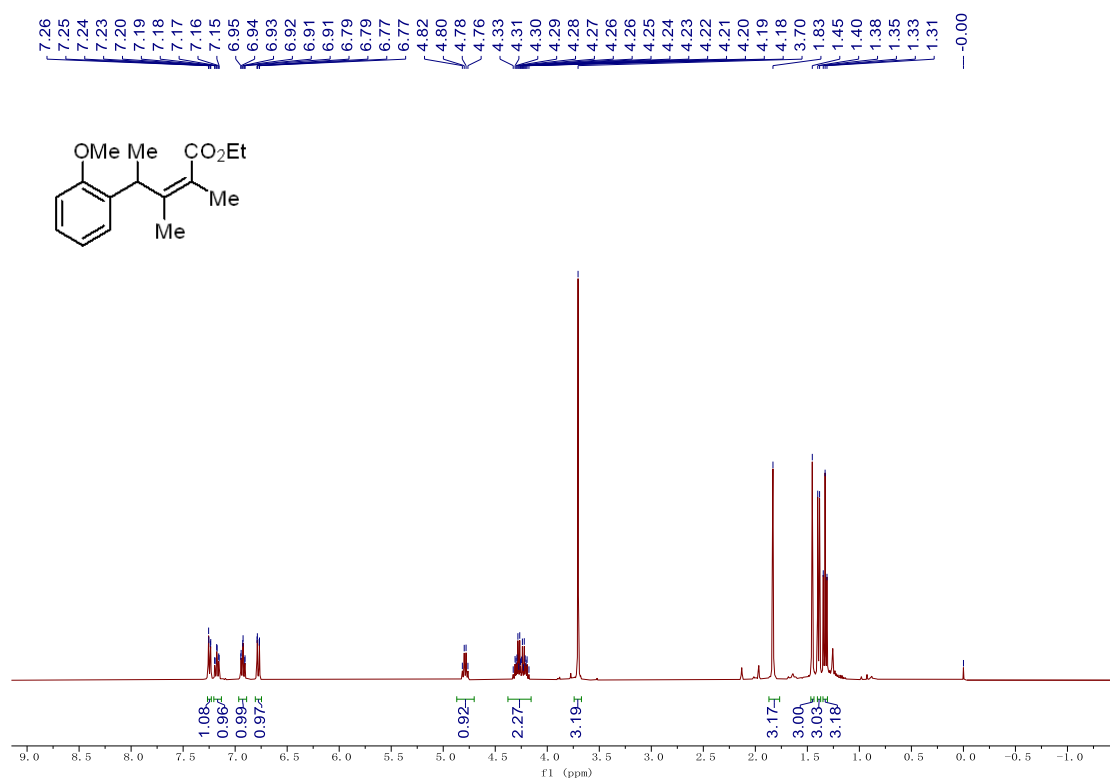

<sup>1</sup>H NMR spectrum for compound **3i**

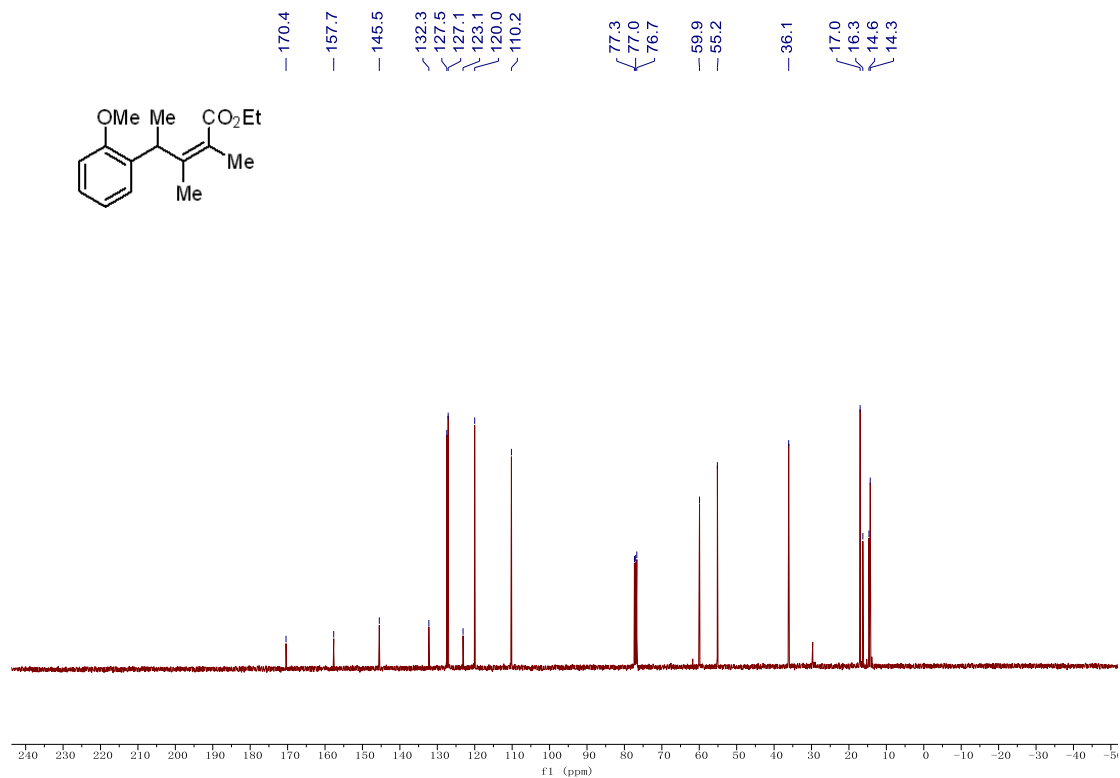

<sup>13</sup>C NMR spectrum for compound **3i**

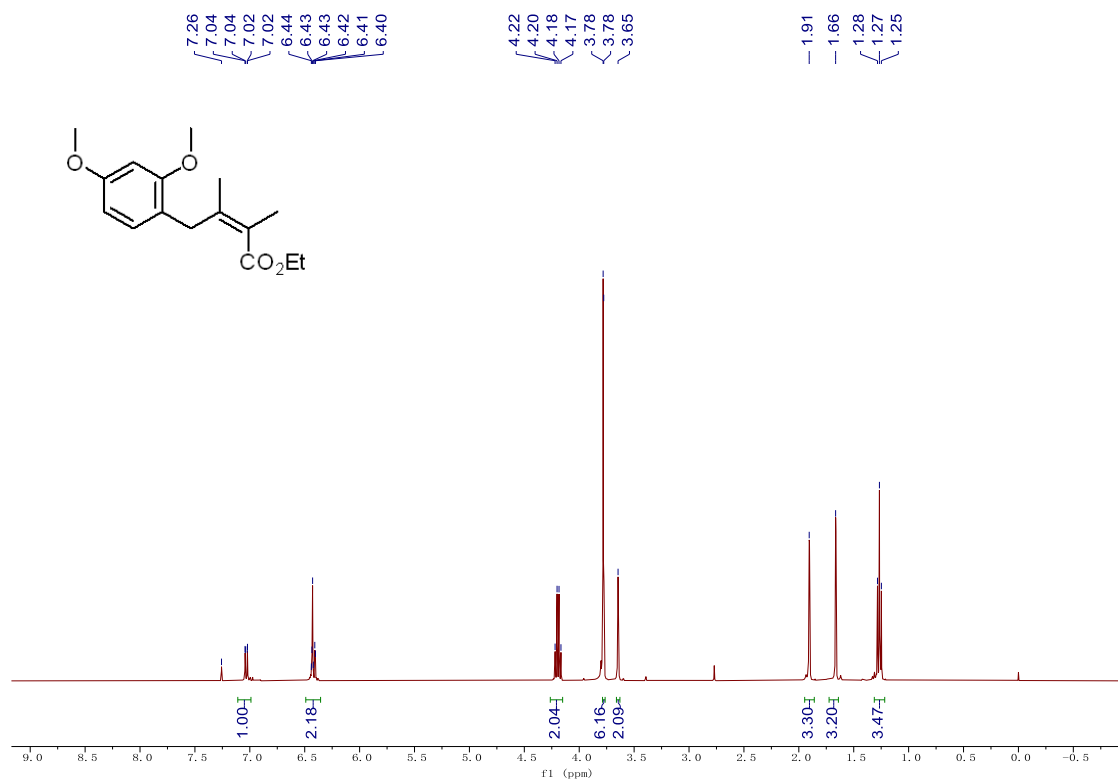

<sup>1</sup>H NMR spectrum for compound **3j**

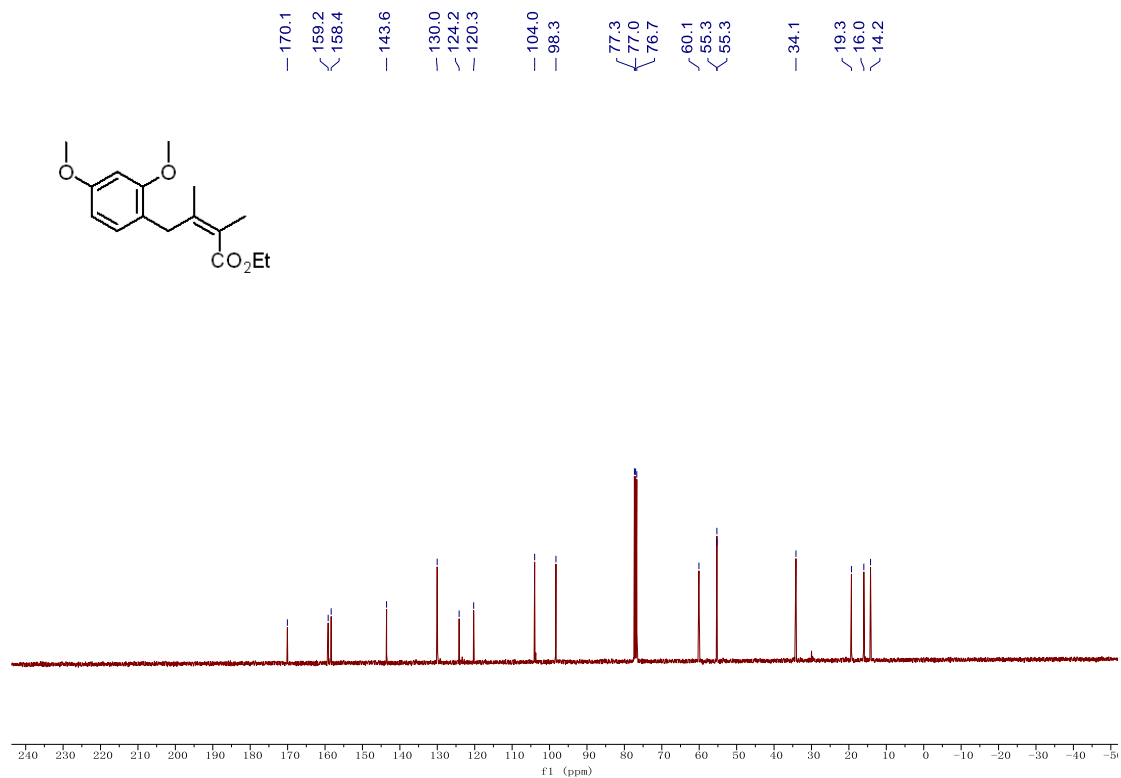

<sup>13</sup>C NMR spectrum for compound **3j**

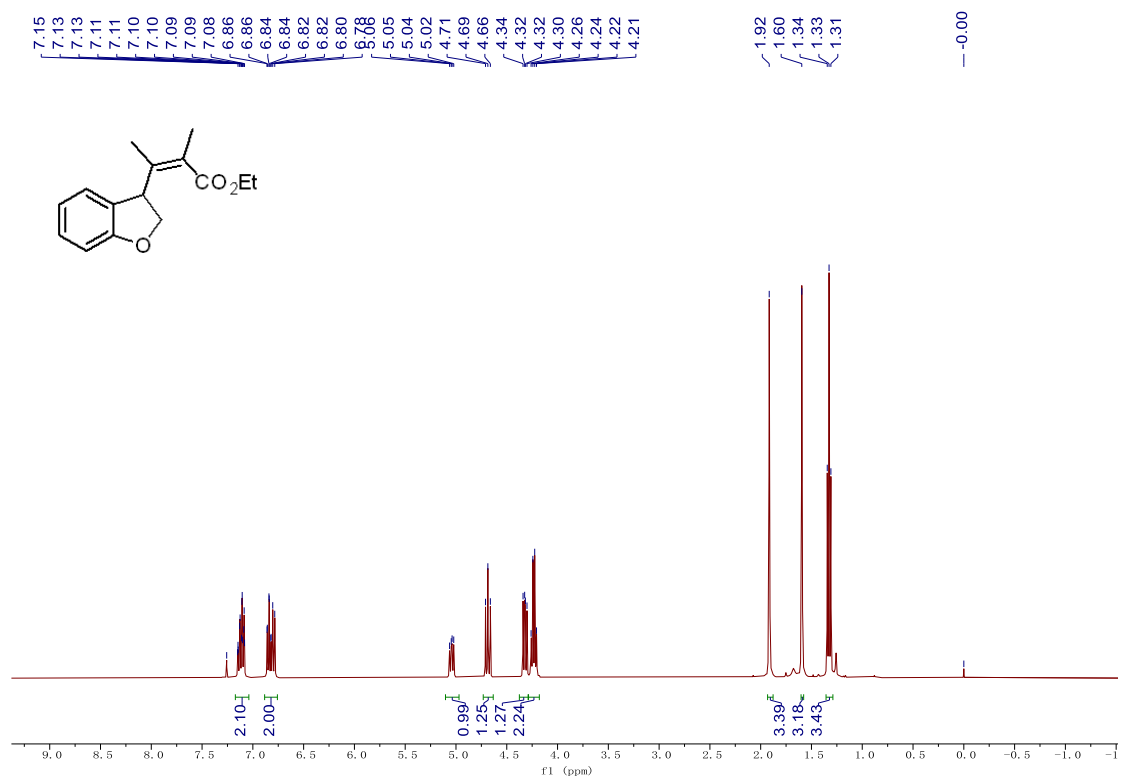

<sup>1</sup>H NMR spectrum for compound **3k**



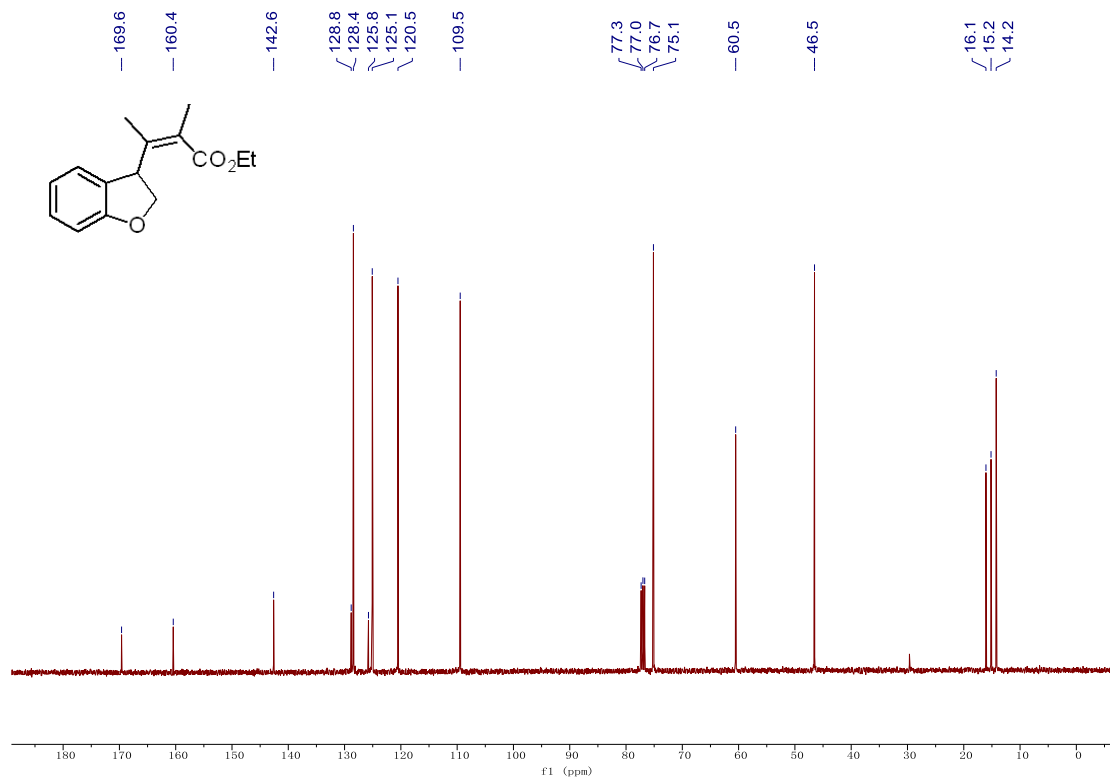

<sup>13</sup>C NMR spectrum for compound 3

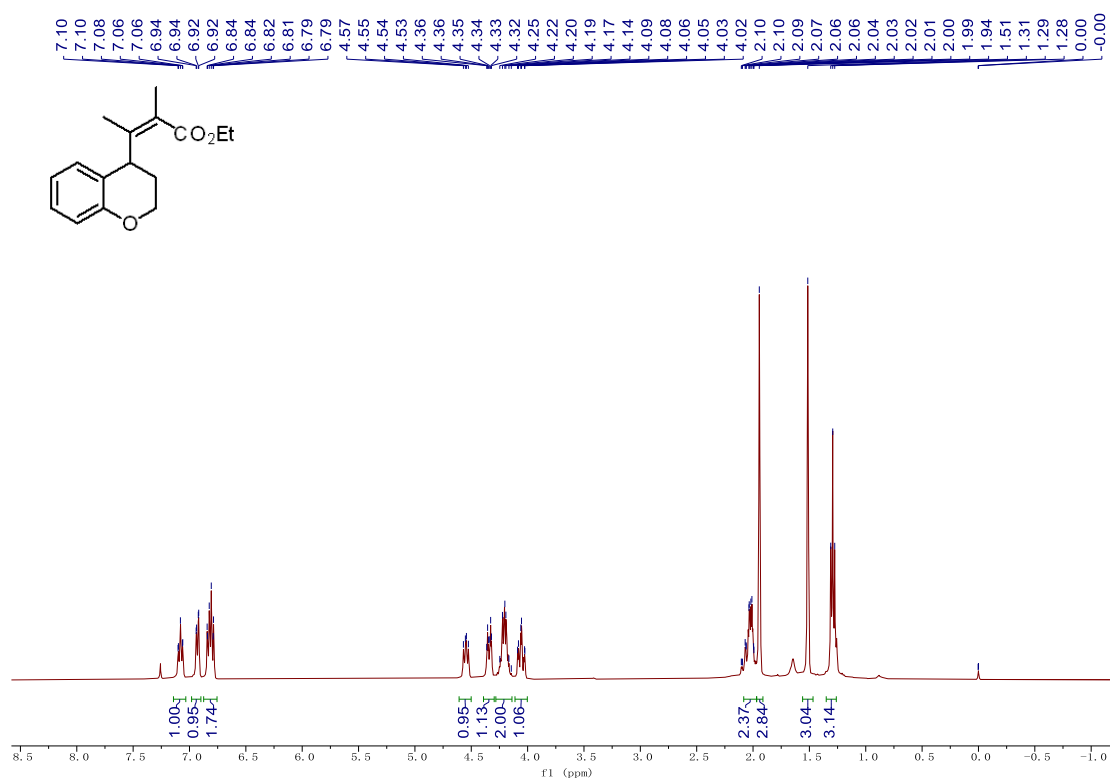

<sup>1</sup>H NMR spectrum for compound 31

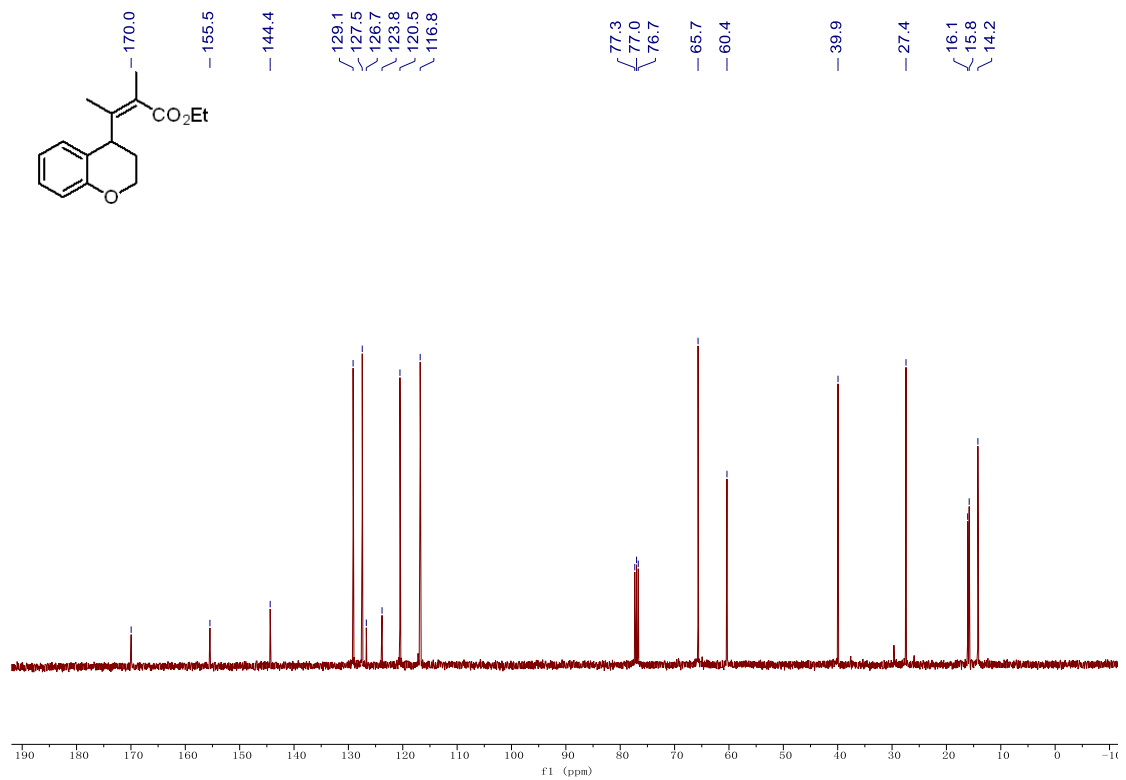

$^{13}\text{C}$  NMR spectrum for compound **3l**

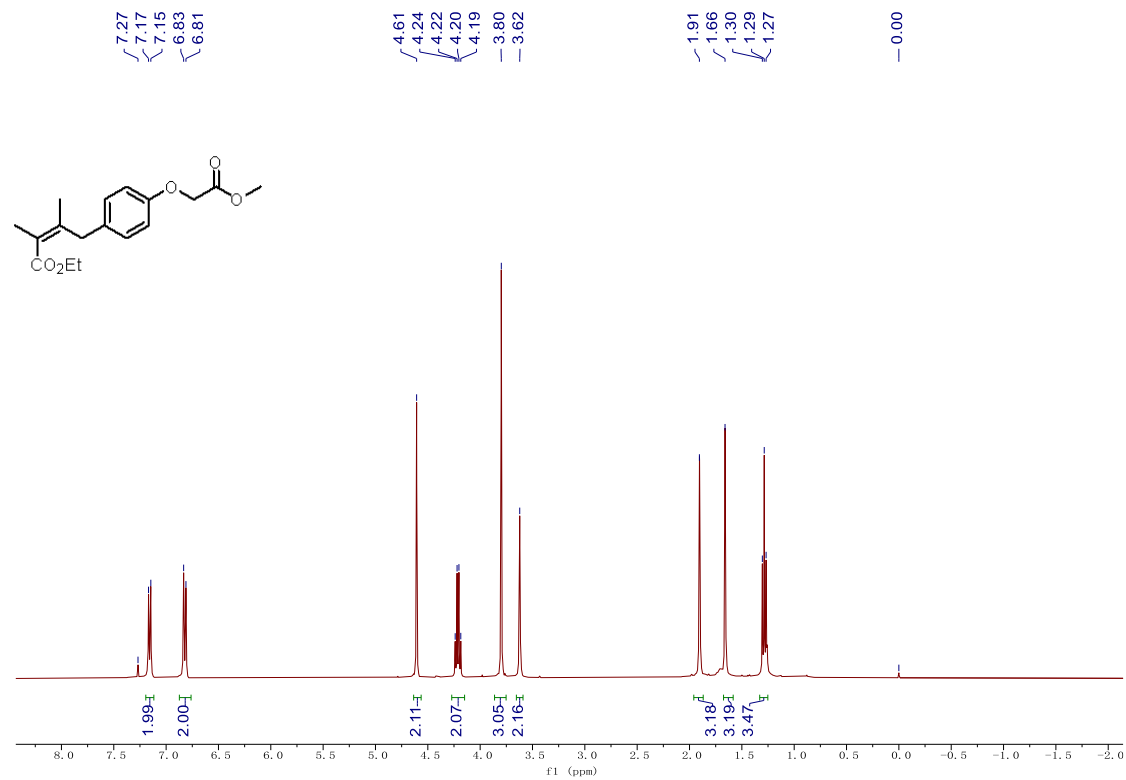

$^1\text{H}$  NMR spectrum for compound **3m**

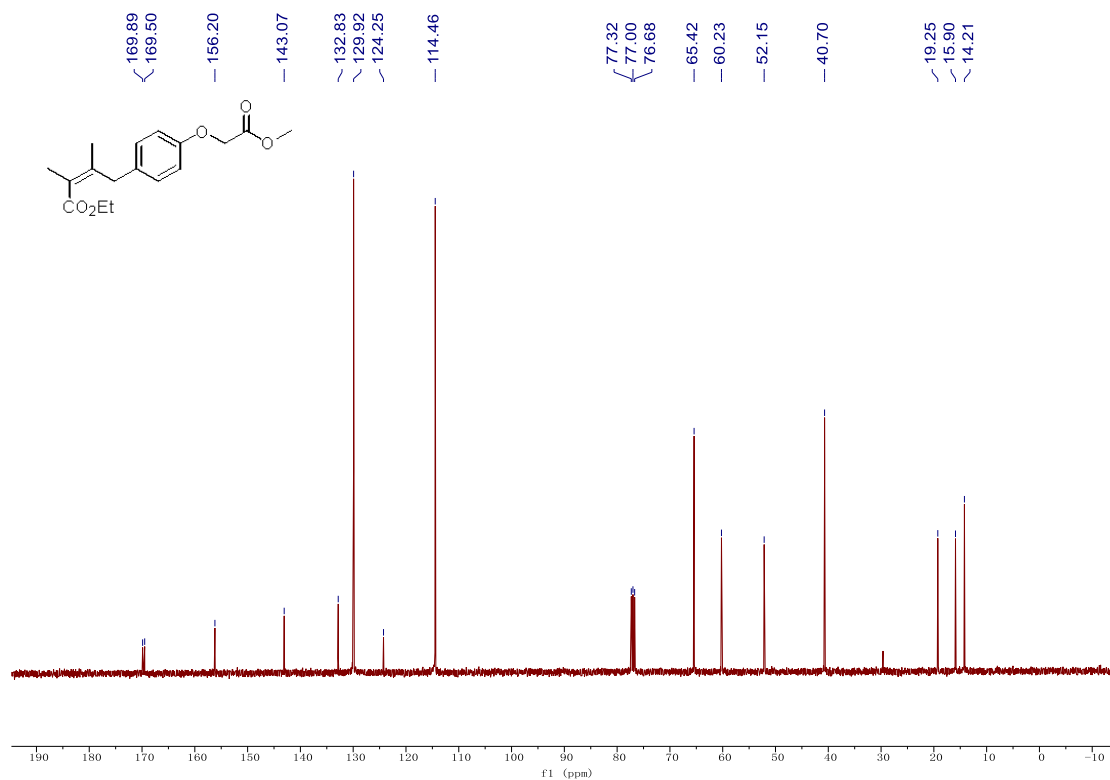

$^{13}\text{C}$  NMR spectrum for compound **3m**

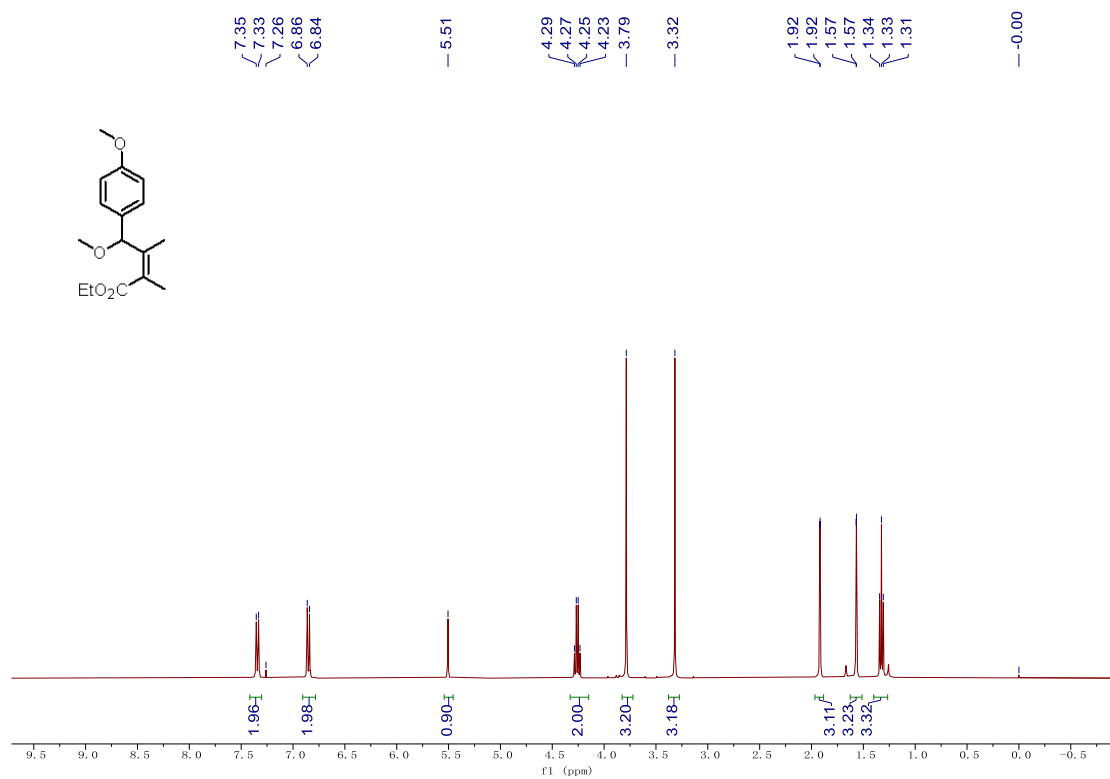

$^1\text{H}$  NMR spectrum for compound **3n**

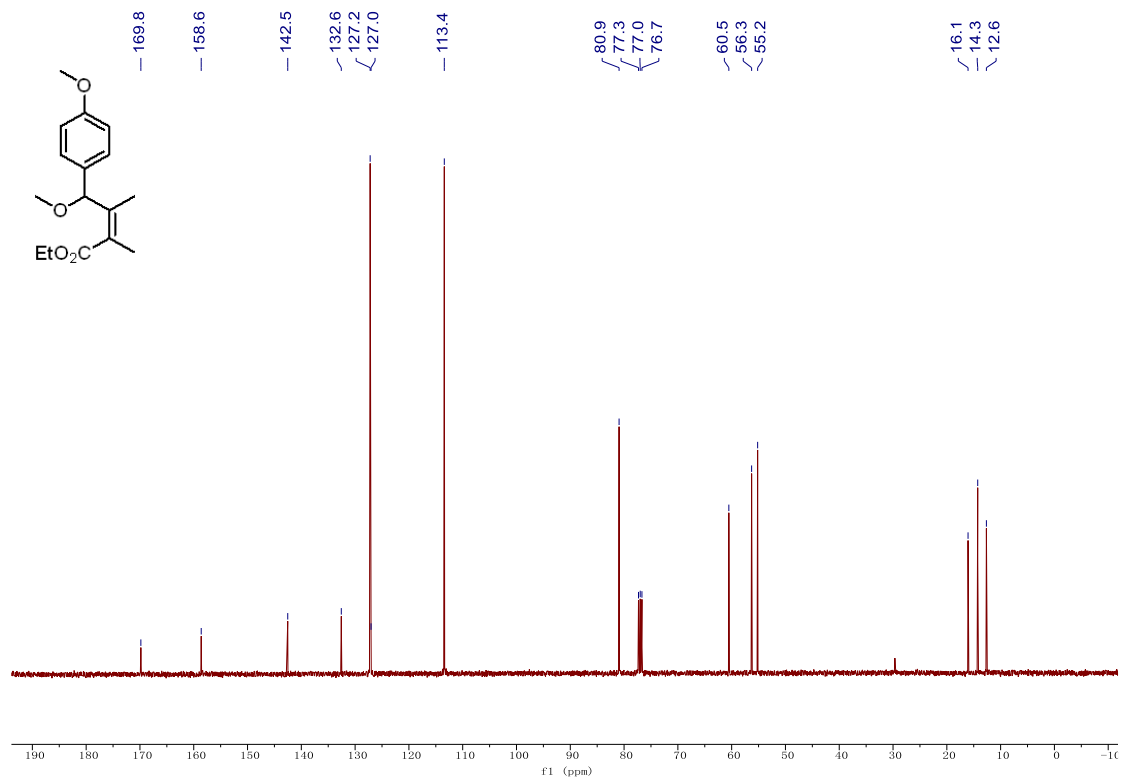

**<sup>13</sup>C NMR spectrum for compound 3n**

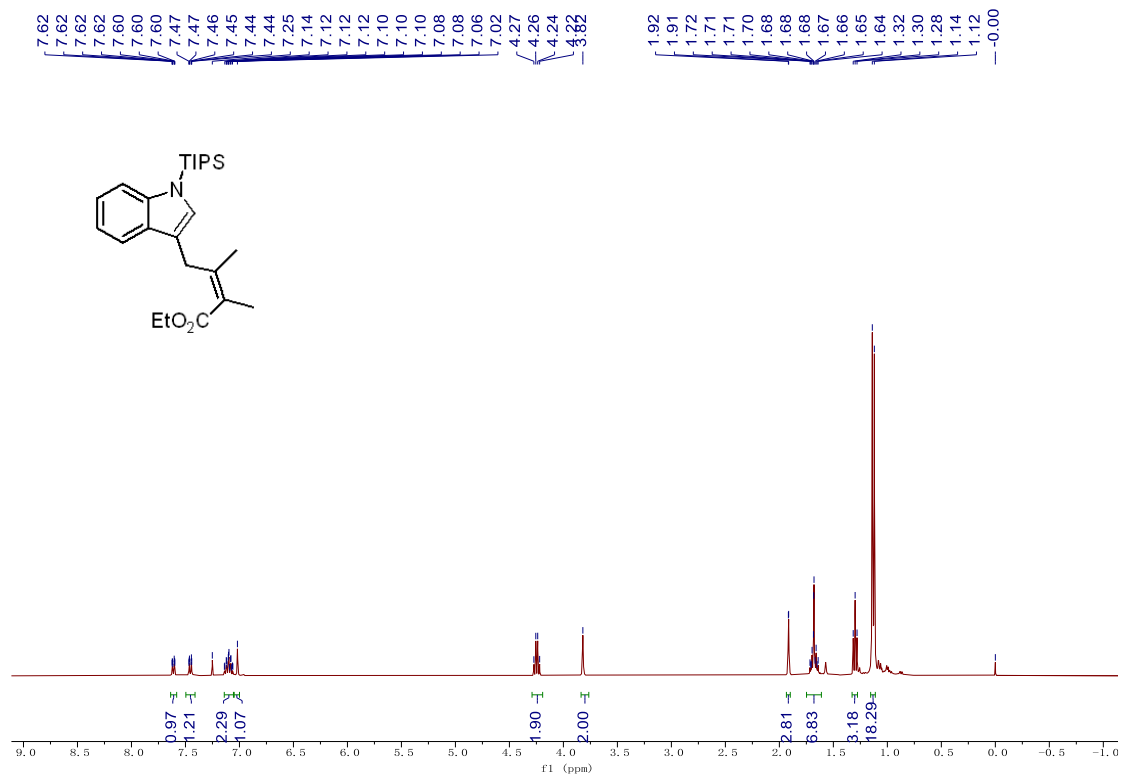

**<sup>1</sup>H NMR spectrum for compound 3o**

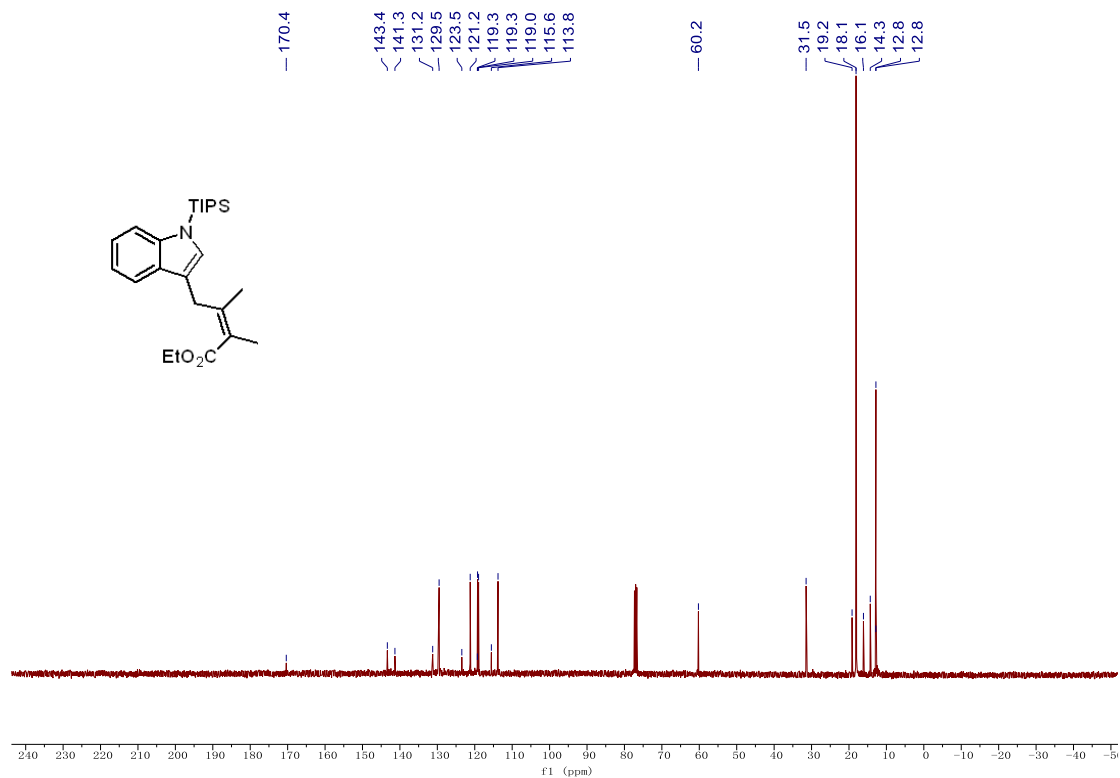

**<sup>13</sup>C NMR spectrum for compound 3o**

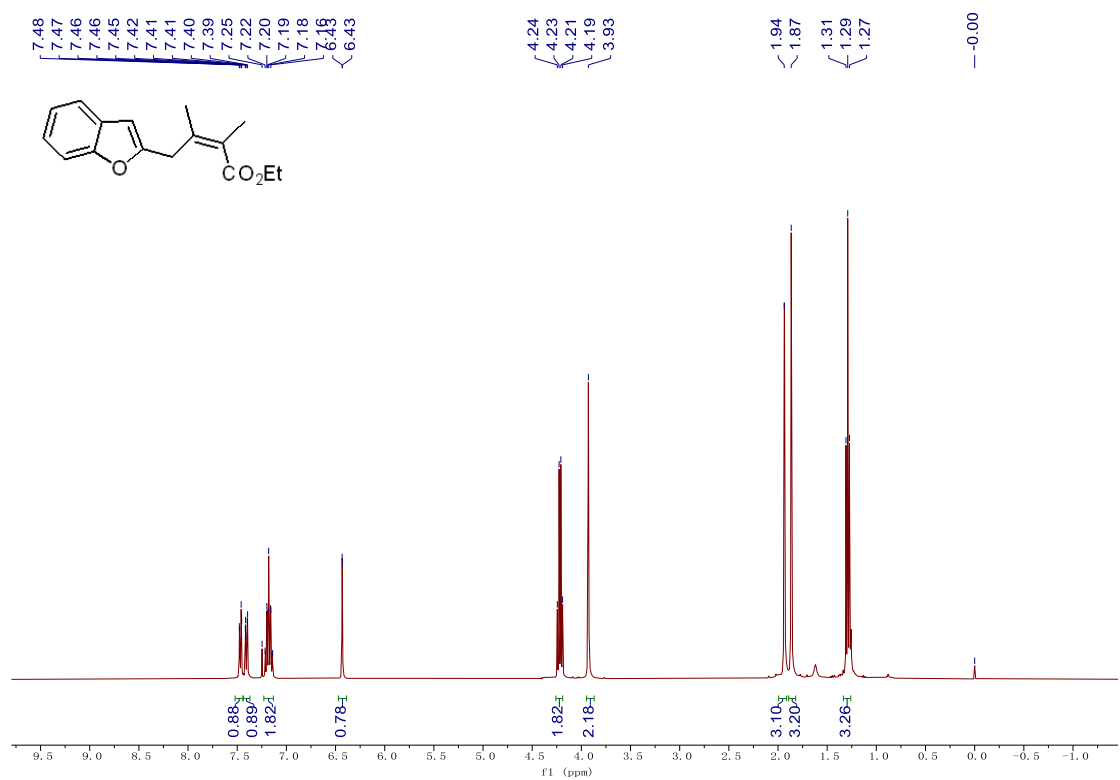

**<sup>1</sup>H NMR spectrum for compound 3p**

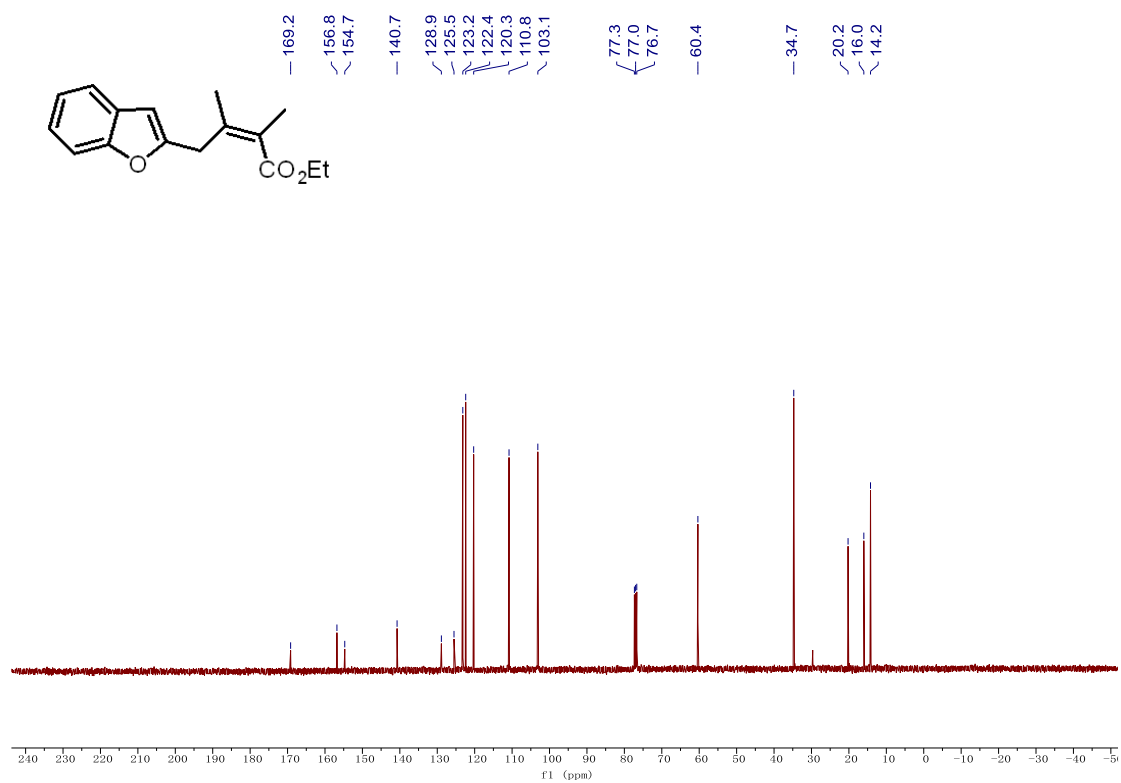

$^{13}\text{C}$  NMR spectrum for compound **3p**

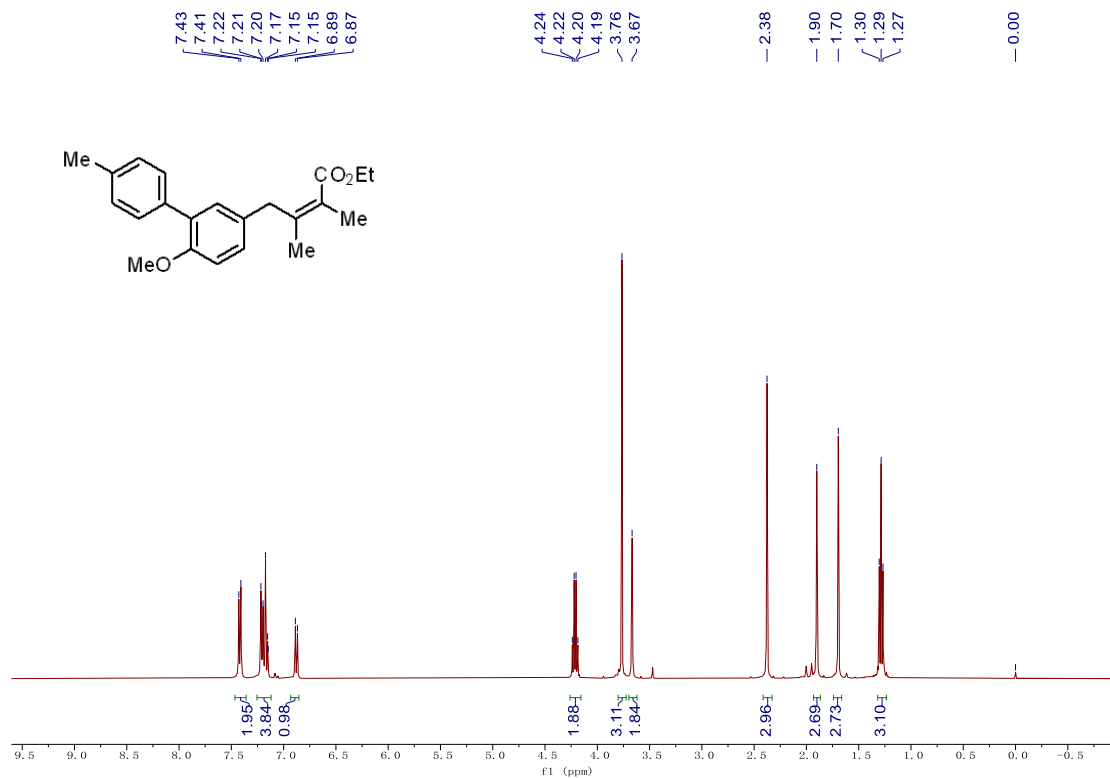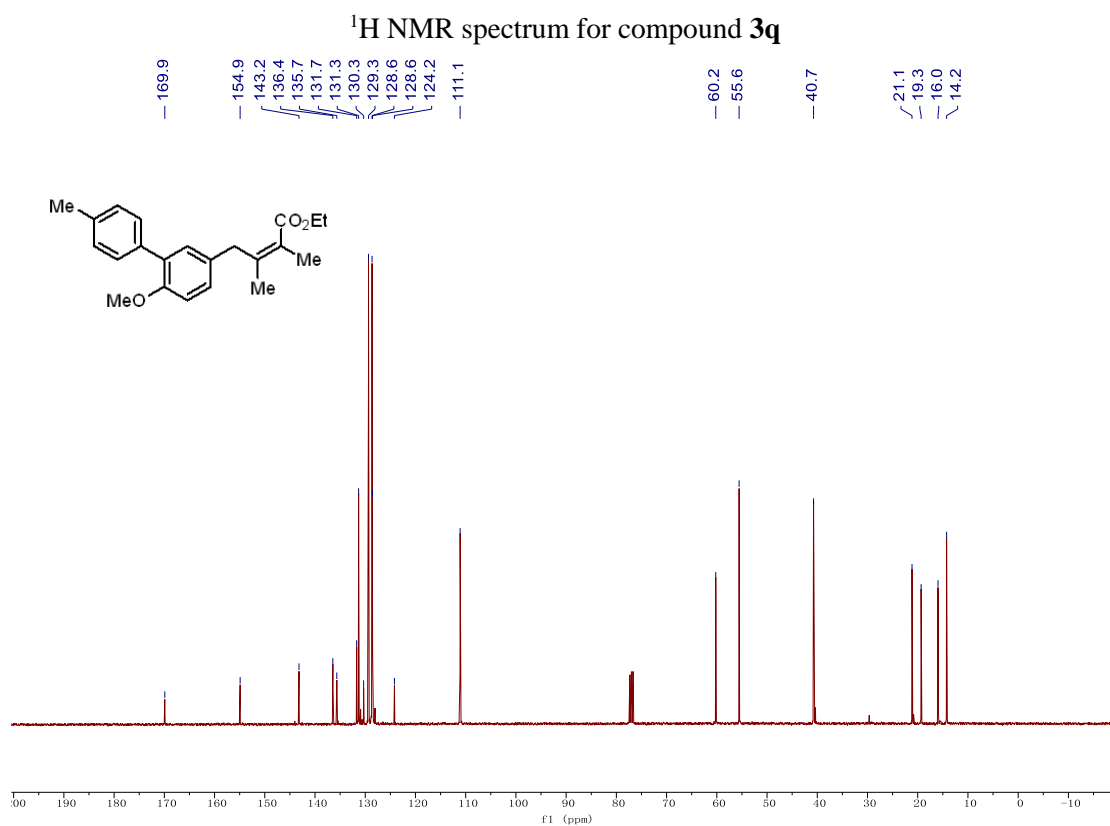

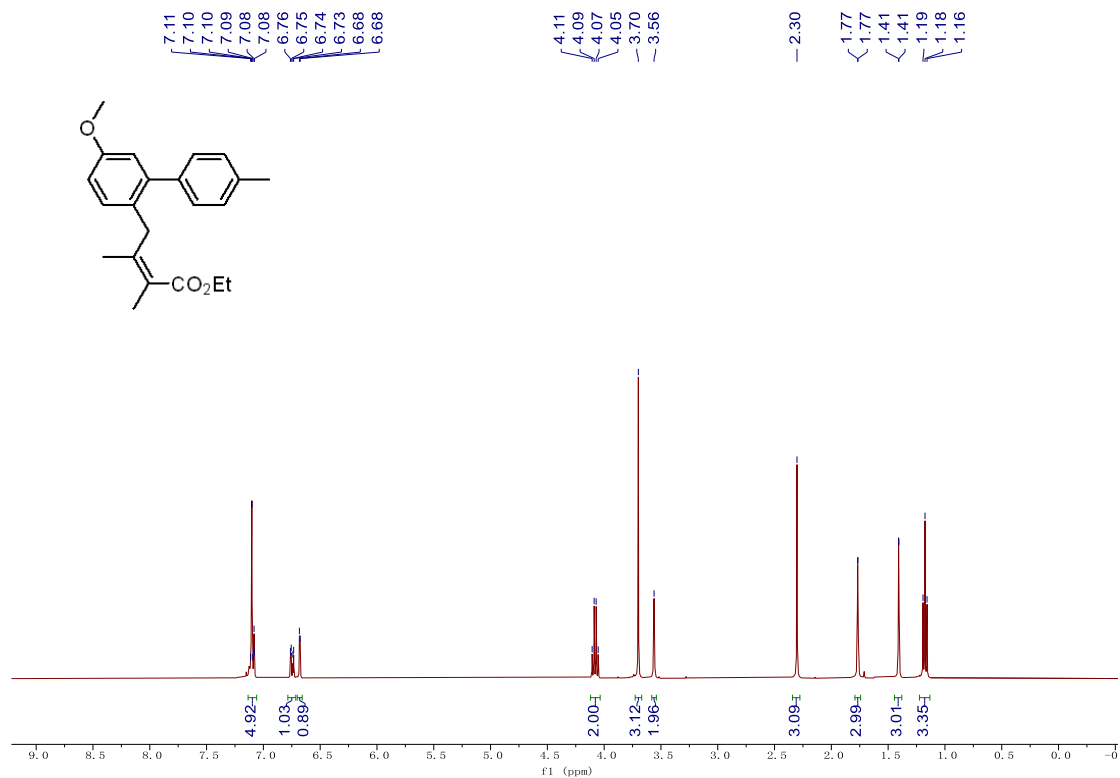

<sup>1</sup>H NMR spectrum for compound **3r**

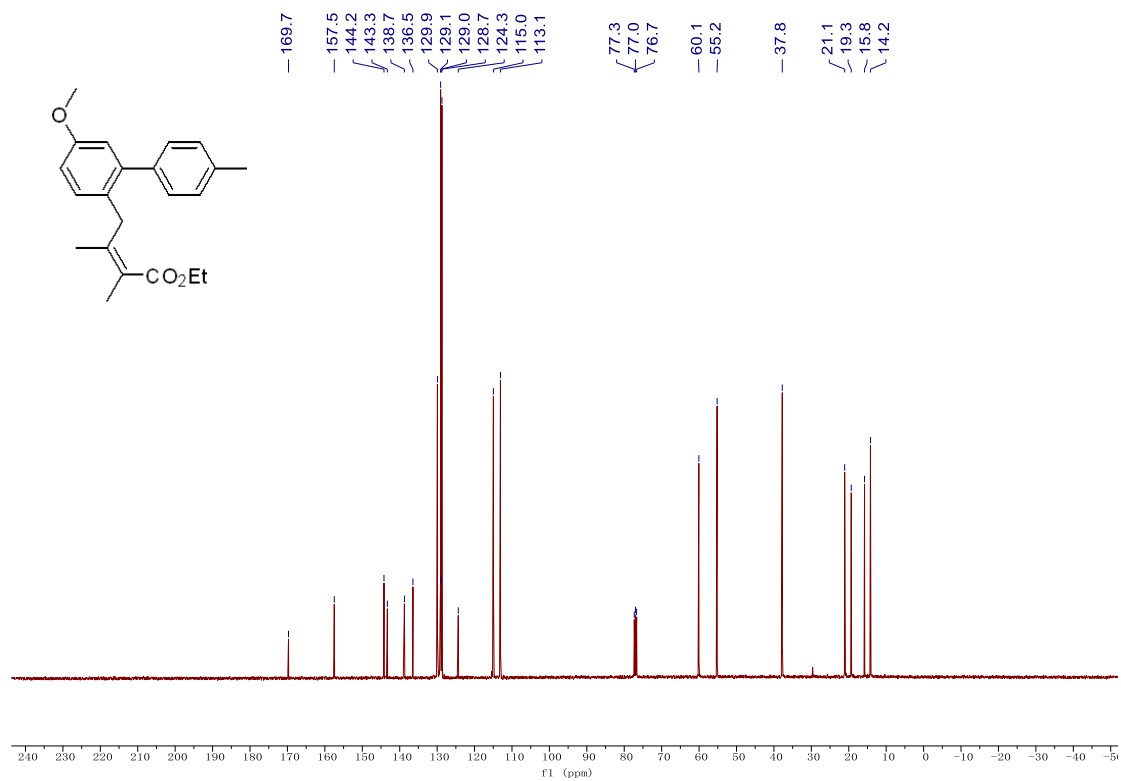

<sup>13</sup>C NMR spectrum for compound **3r**



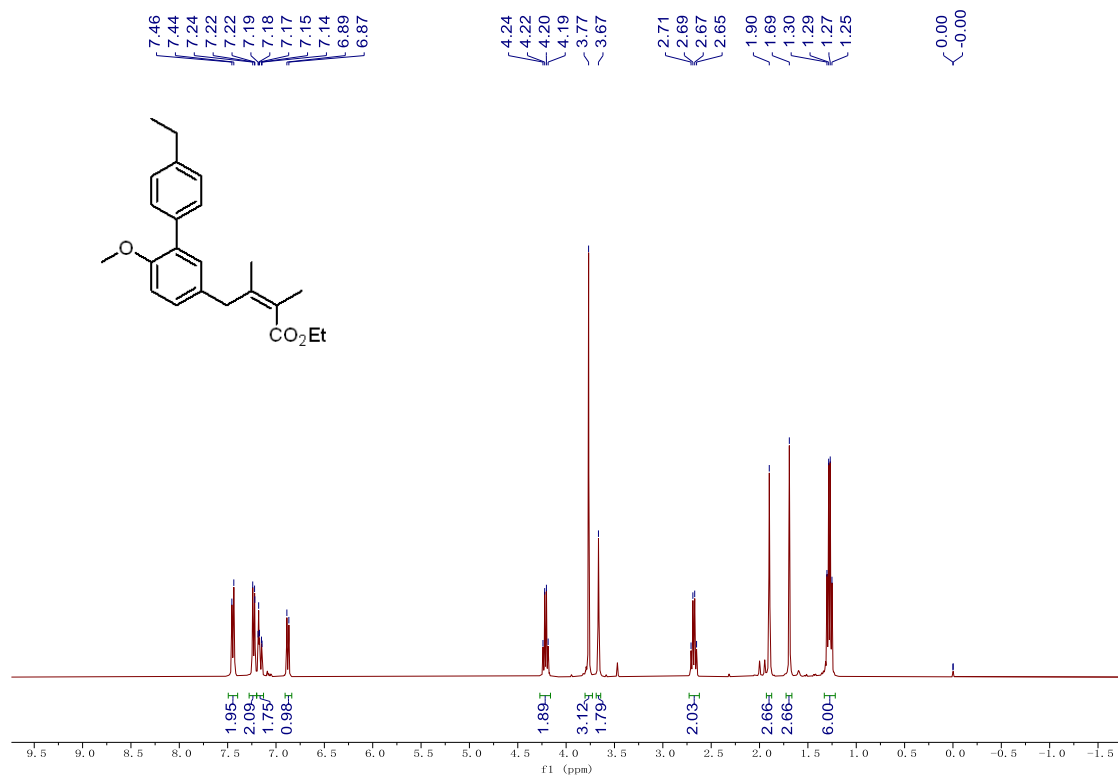

<sup>1</sup>H NMR spectrum for compound 3s

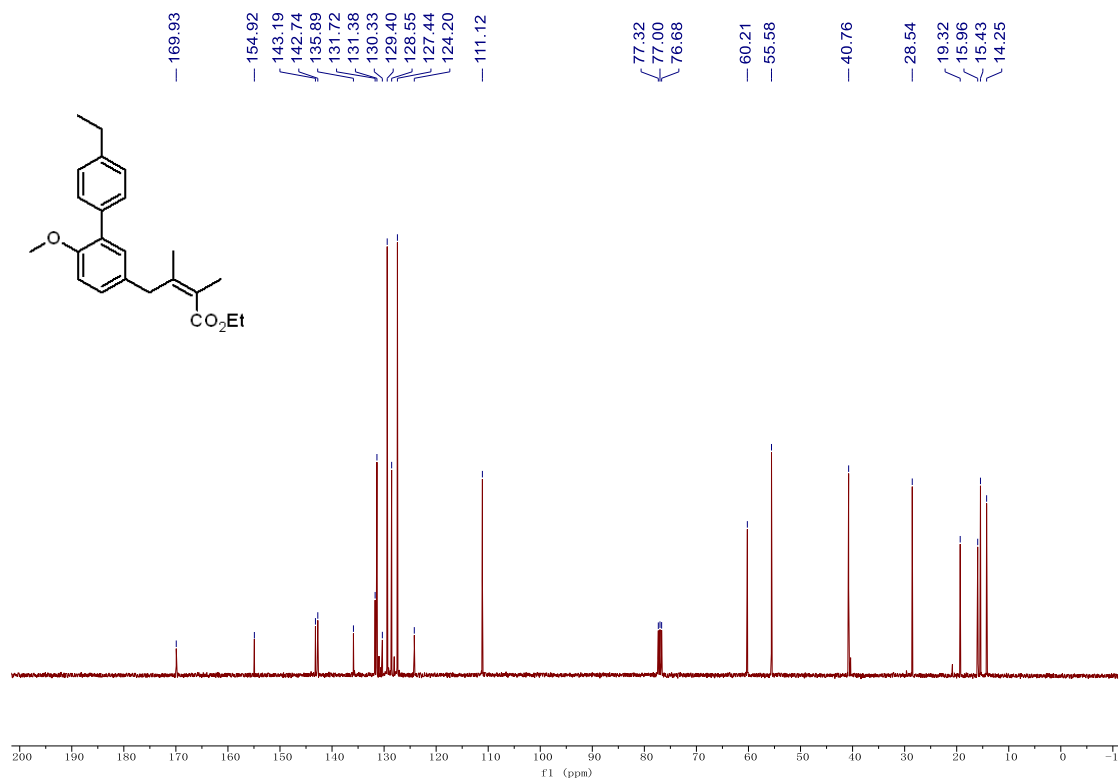

<sup>13</sup>C NMR spectrum for compound 3s

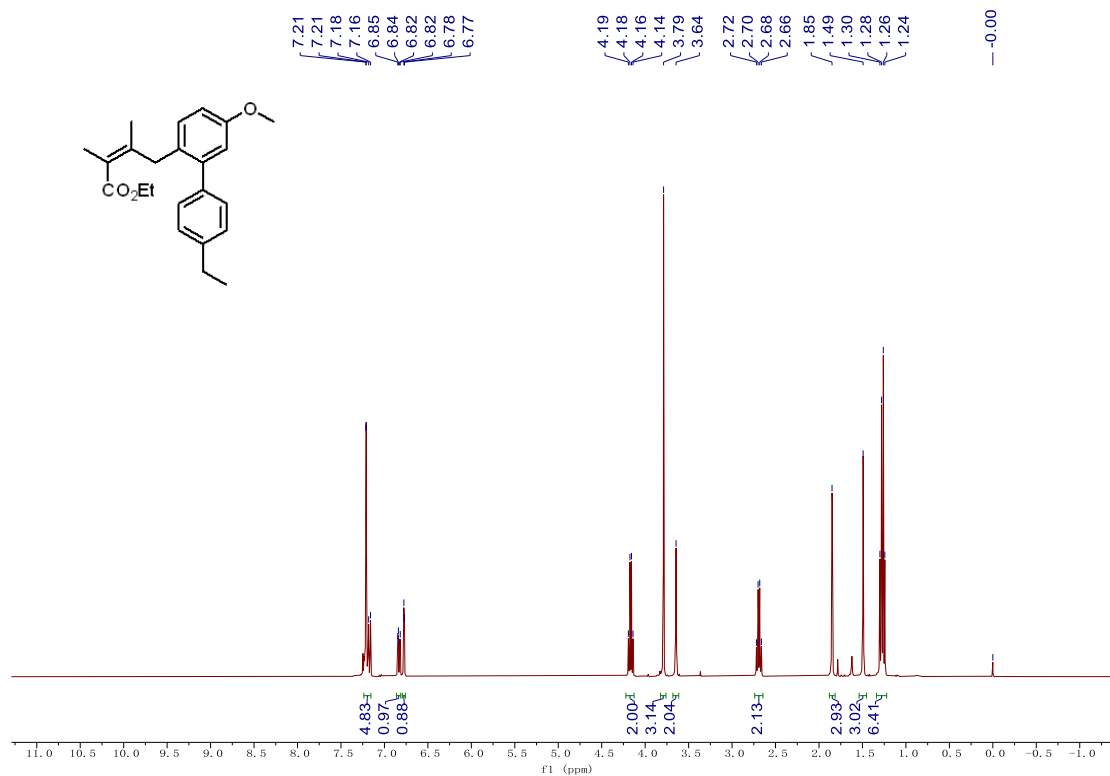

<sup>1</sup>H NMR spectrum for compound 3t

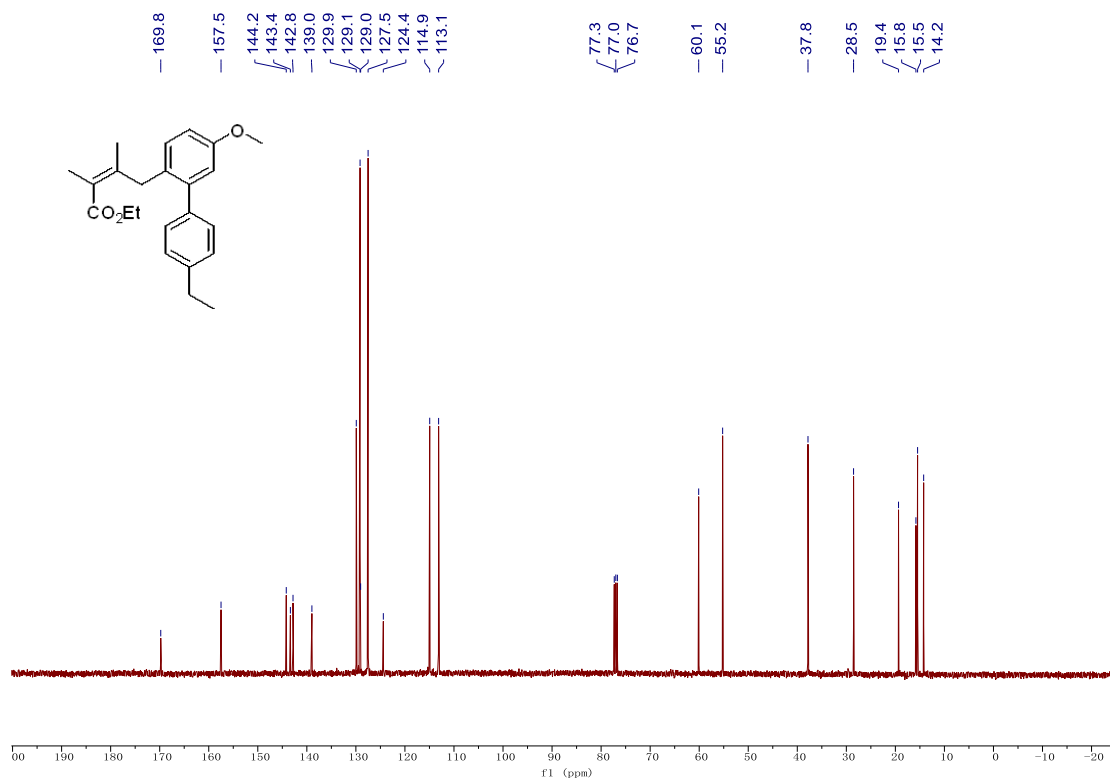

<sup>13</sup>C NMR spectrum for compound 3t

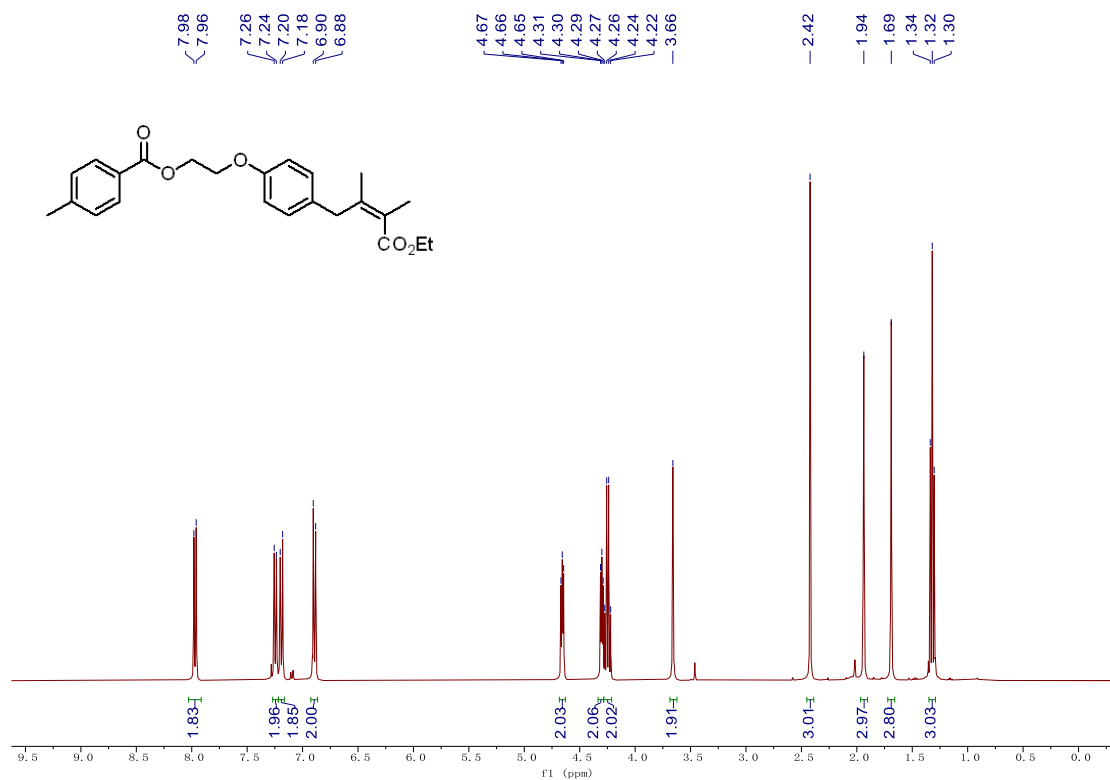

**<sup>1</sup>H NMR spectrum for compound 3u**

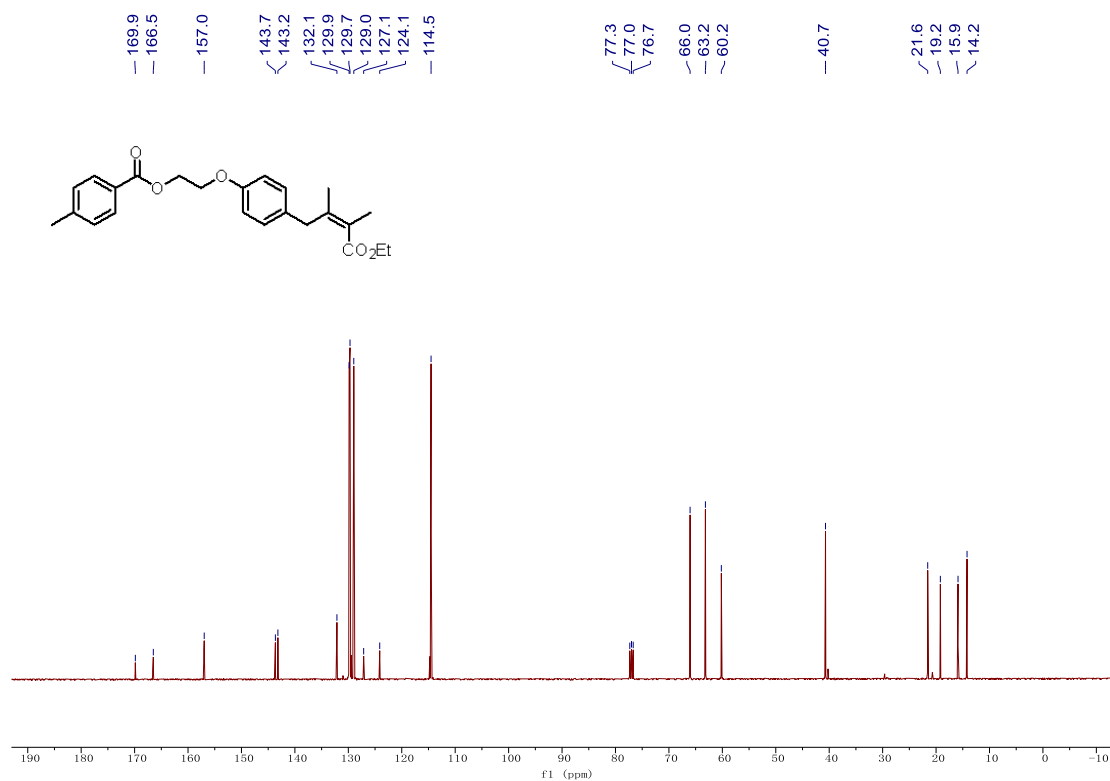

**<sup>13</sup>C NMR spectrum for compound 3u**

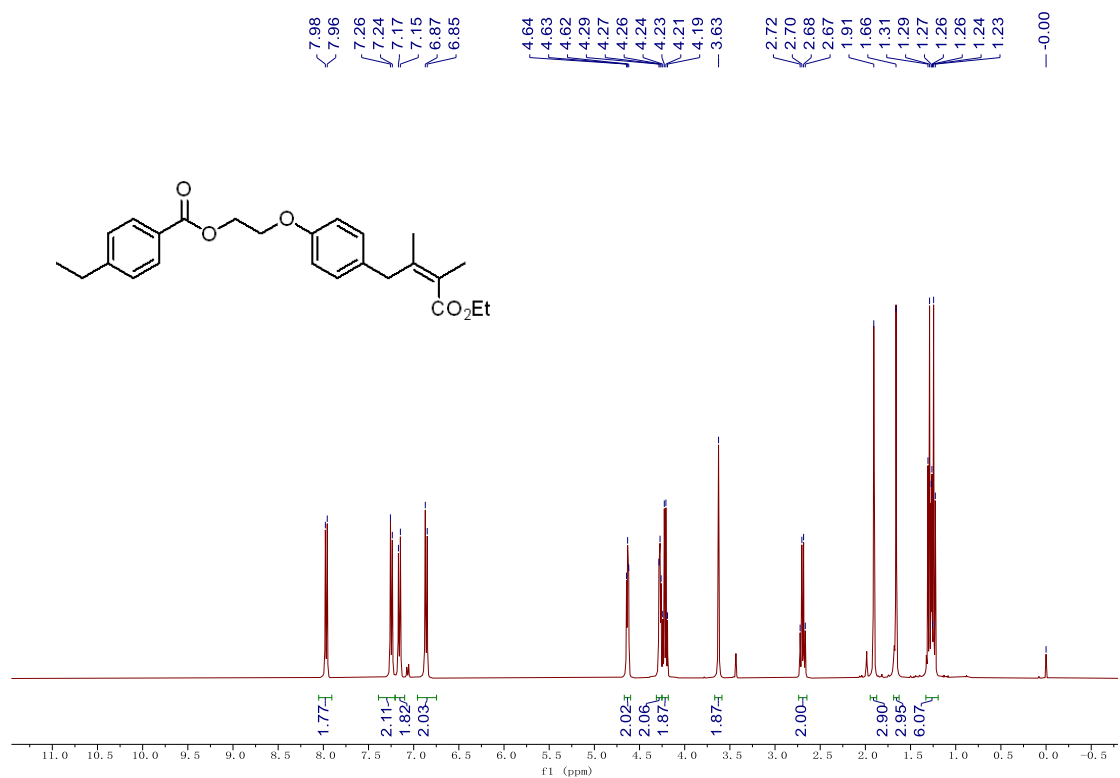

<sup>1</sup>H NMR spectrum for compound **3v**

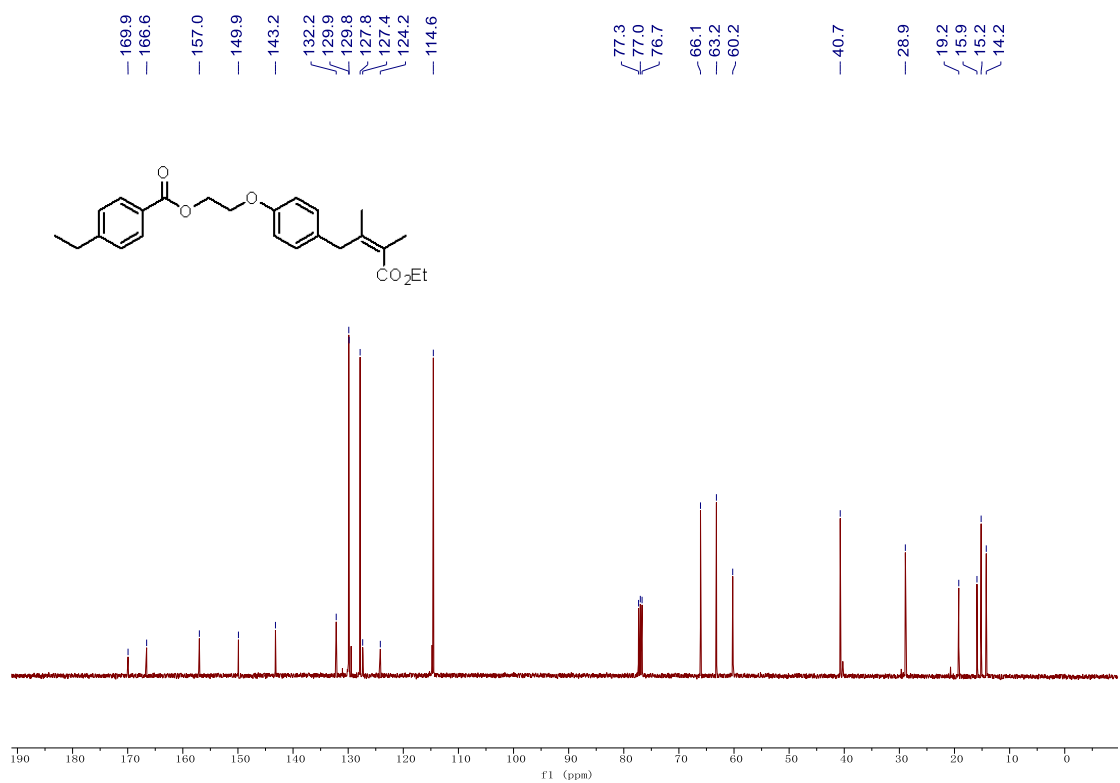

<sup>13</sup>C NMR spectrum for compound **3v**

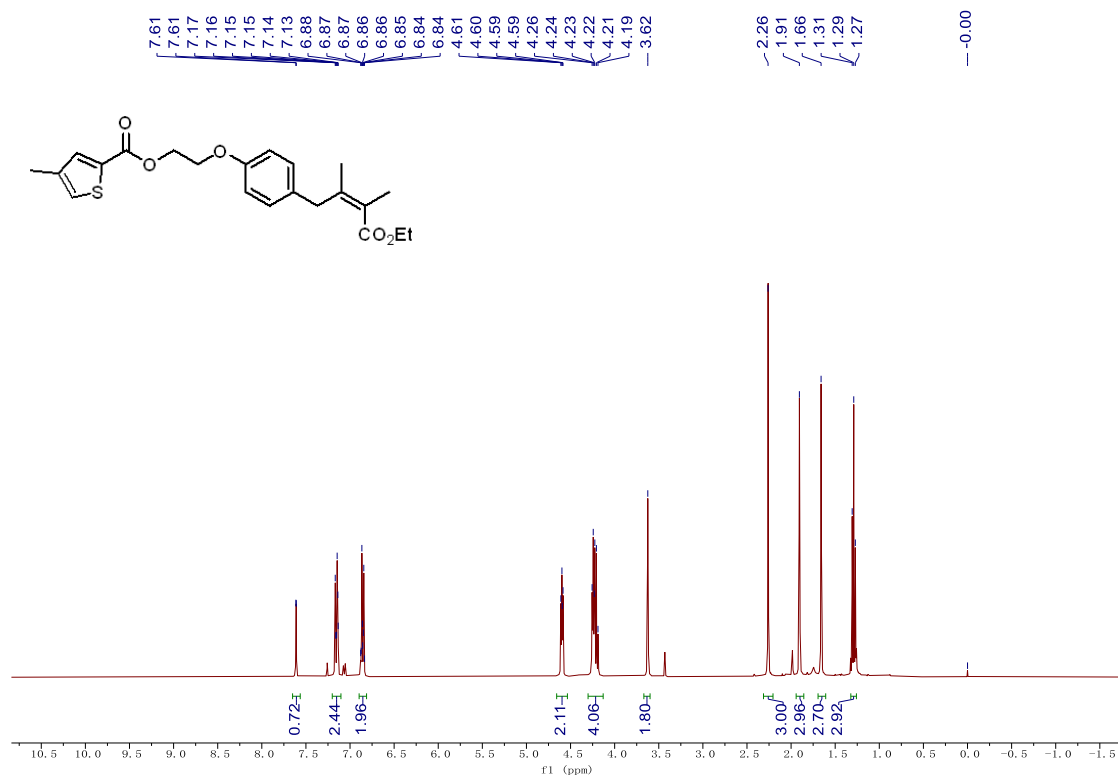

**<sup>1</sup>H NMR spectrum for compound 3w**

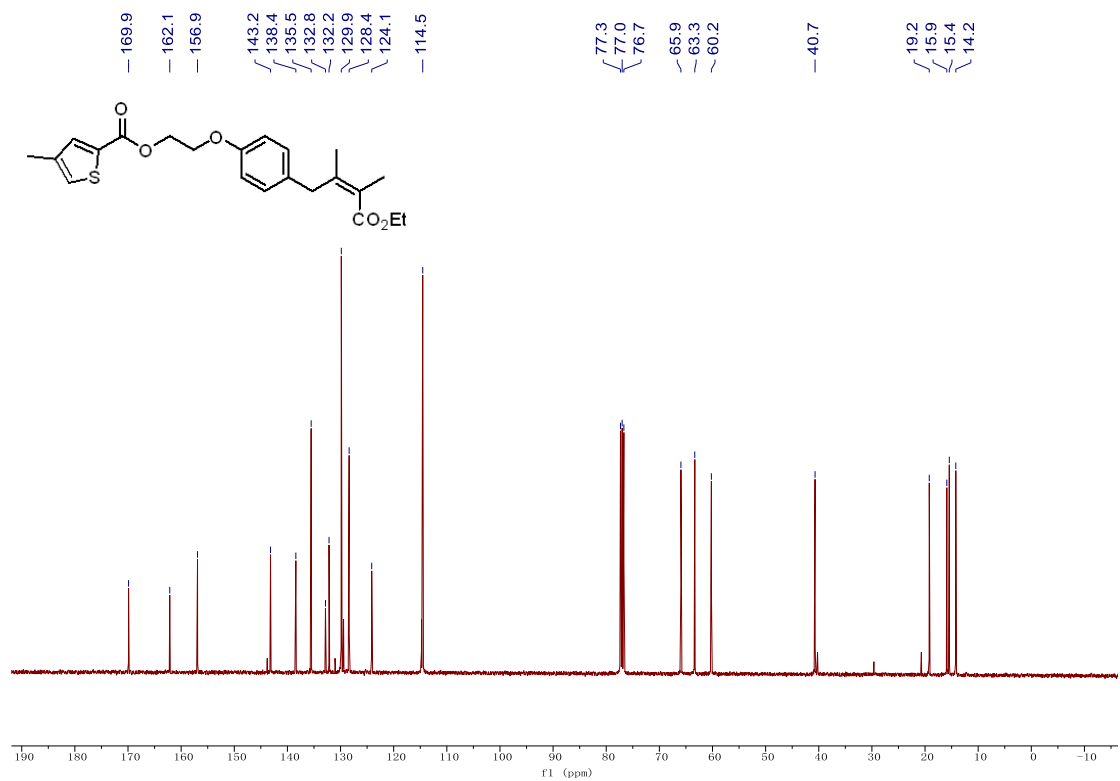

**<sup>13</sup>C NMR spectrum for compound 3w**

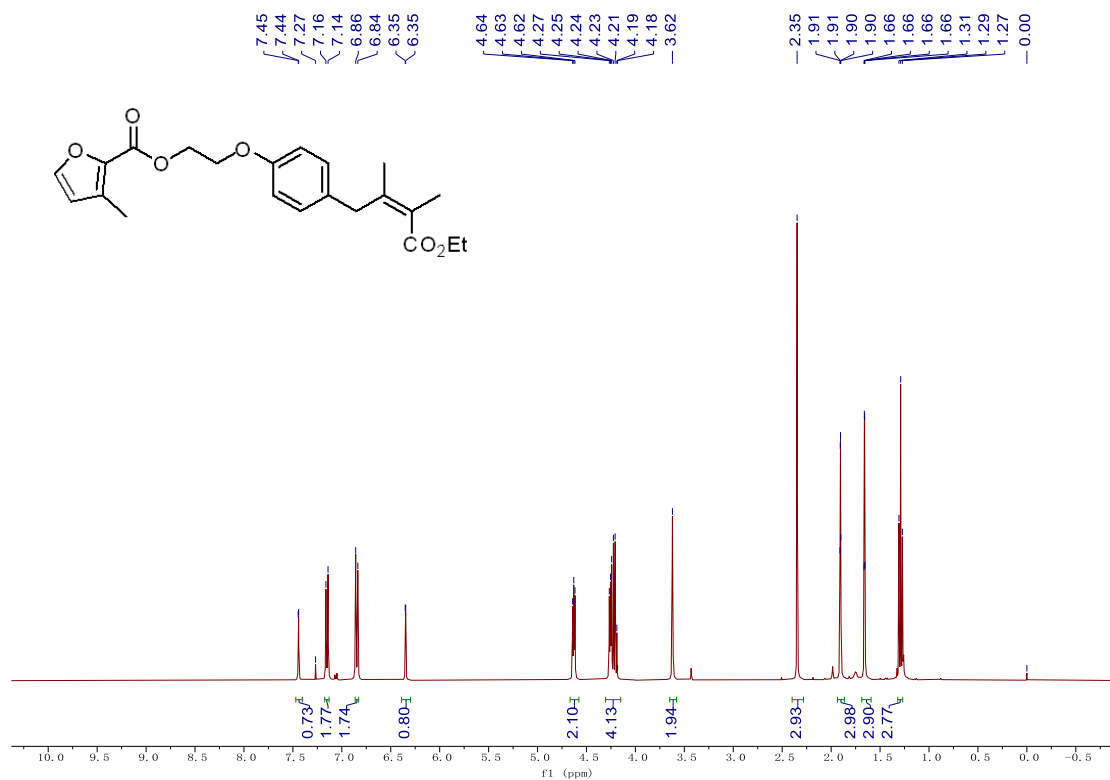

<sup>1</sup>H NMR spectrum for compound **3x**

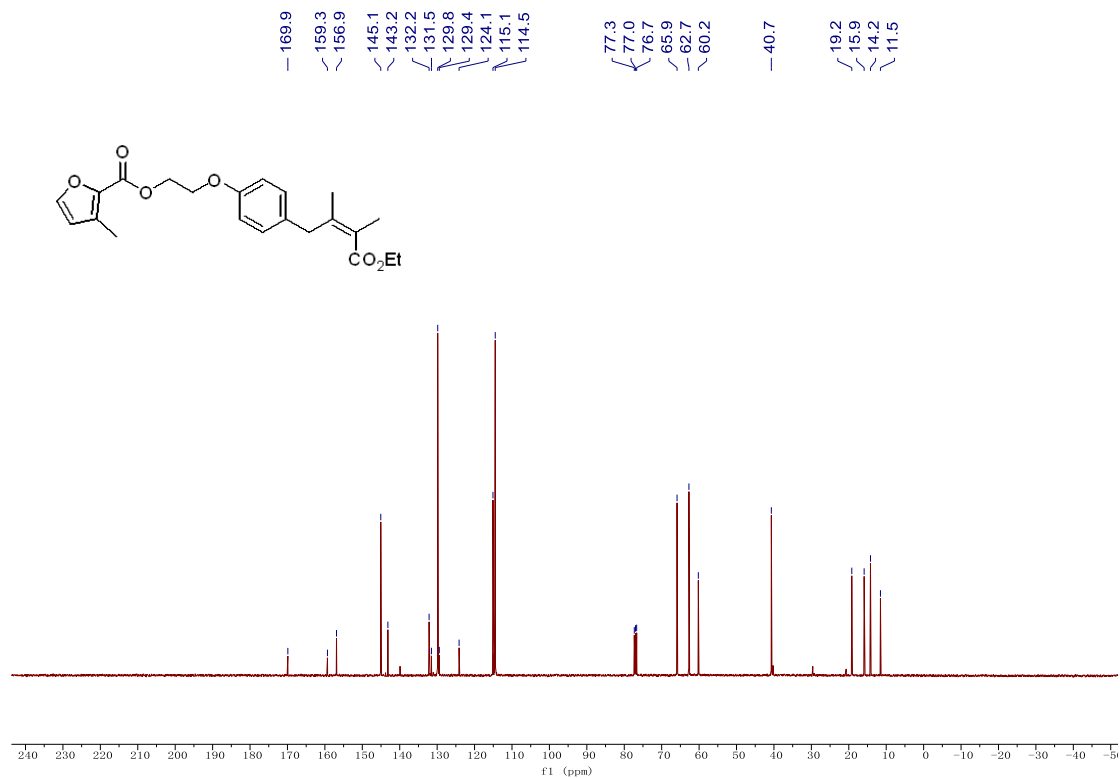

<sup>13</sup>C NMR spectrum for compound **3x**

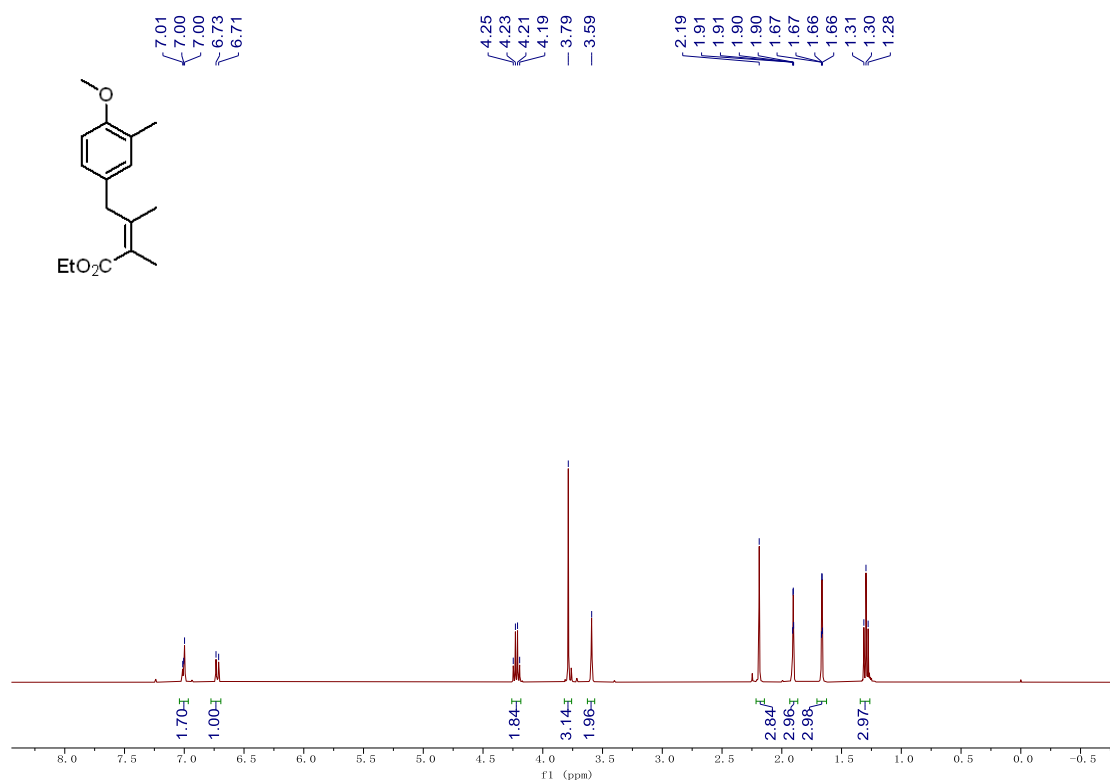

<sup>1</sup>H NMR spectrum for compound **3y**

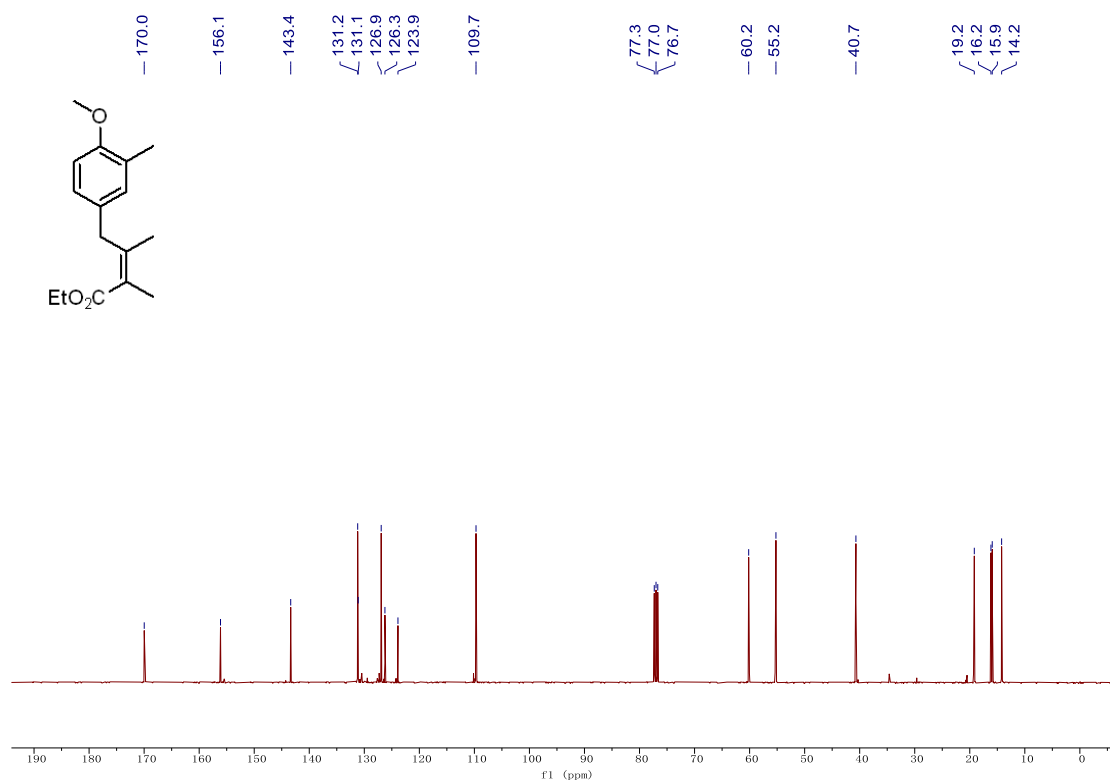

<sup>13</sup>C NMR spectrum for compound **3y**

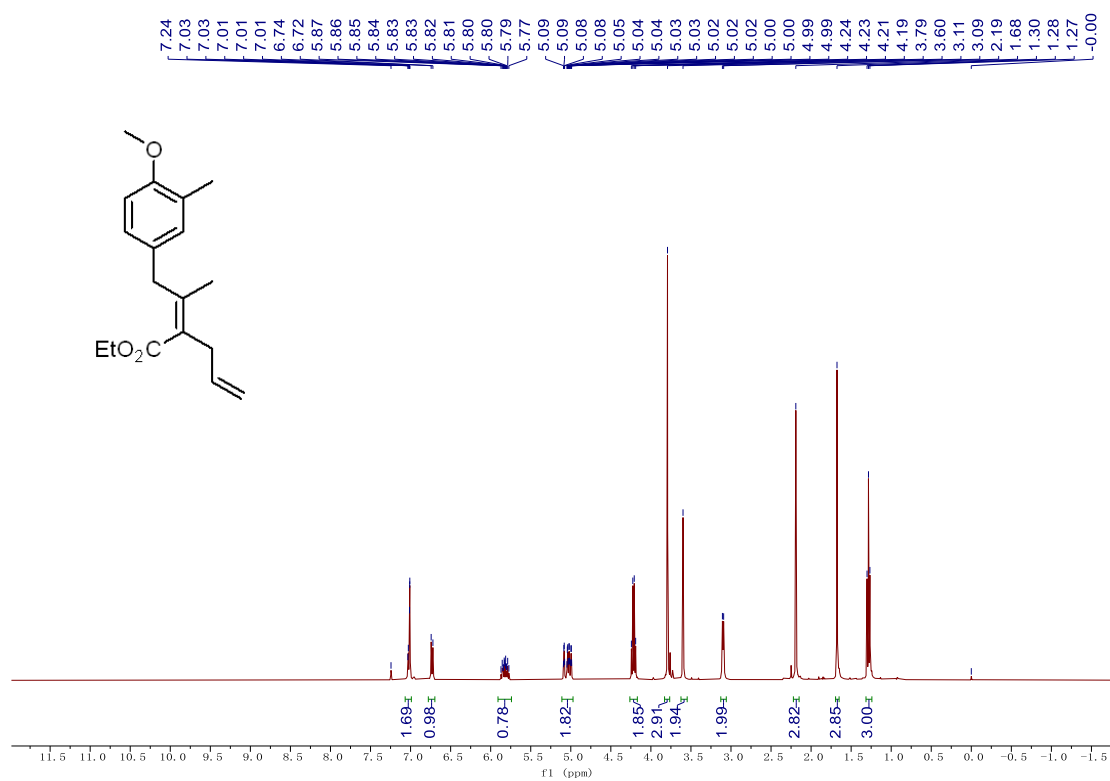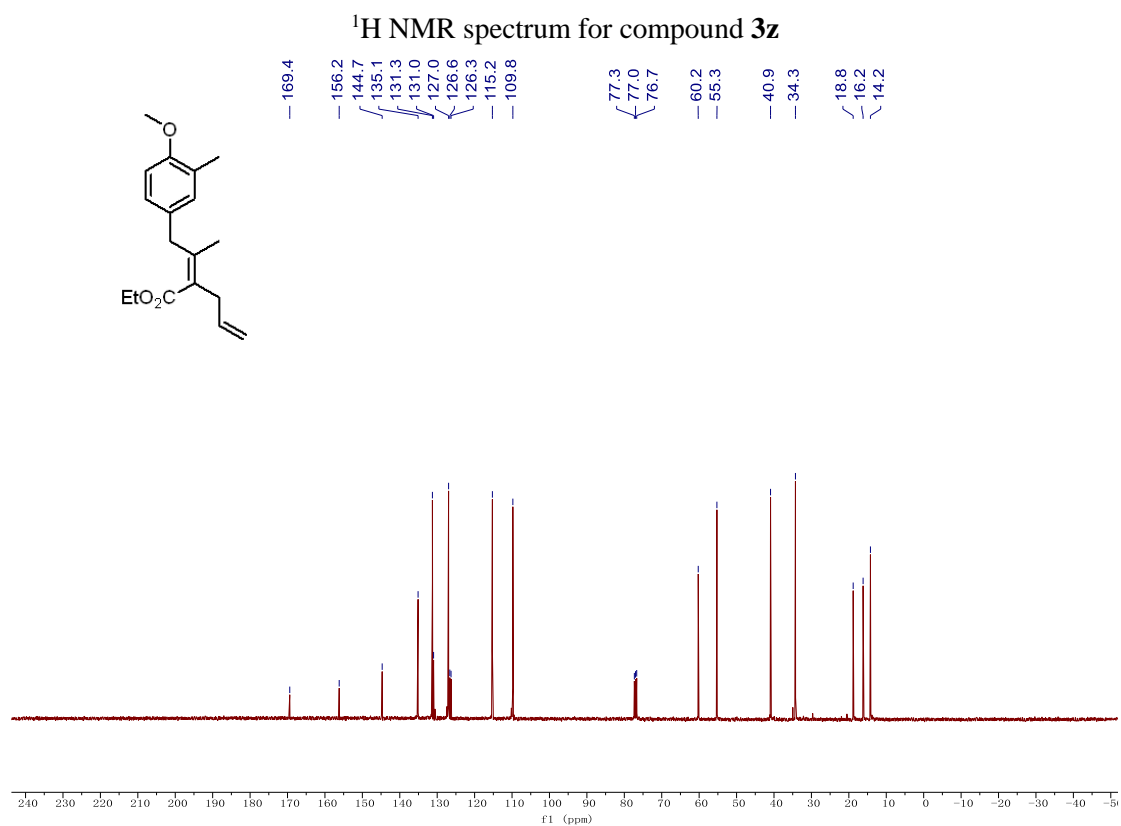



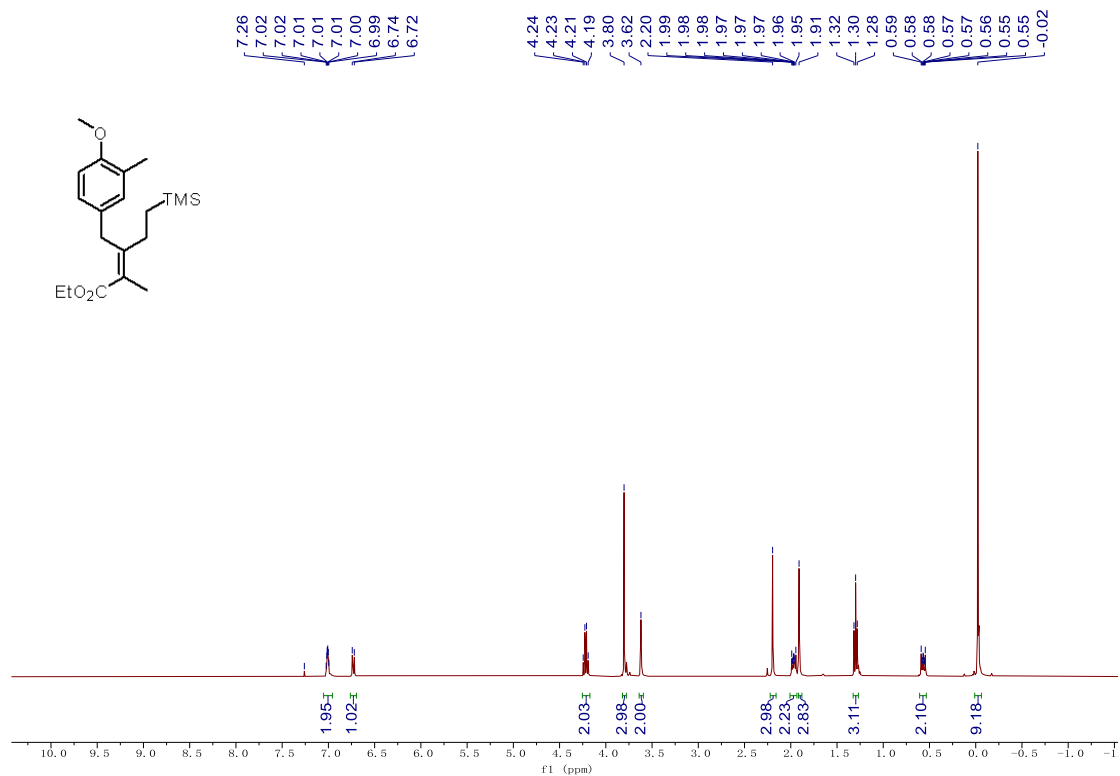

<sup>1</sup>H NMR spectrum for compound 3aa

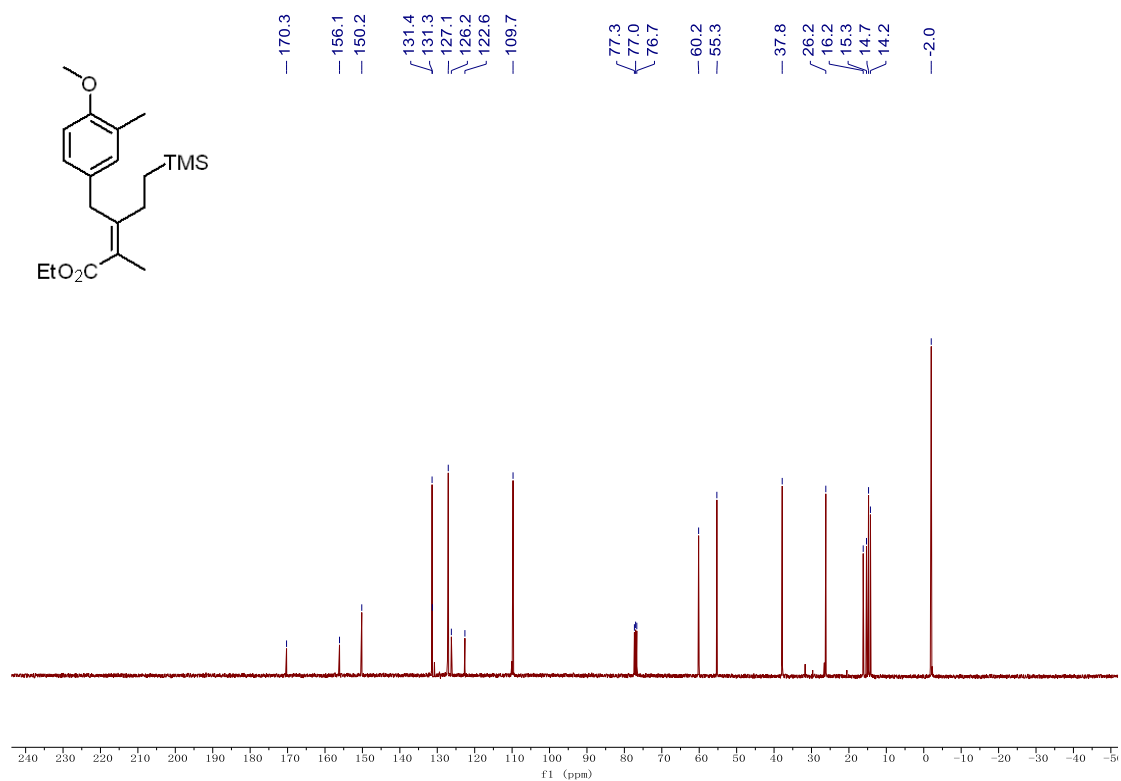

<sup>13</sup>C NMR spectrum for compound 3aa

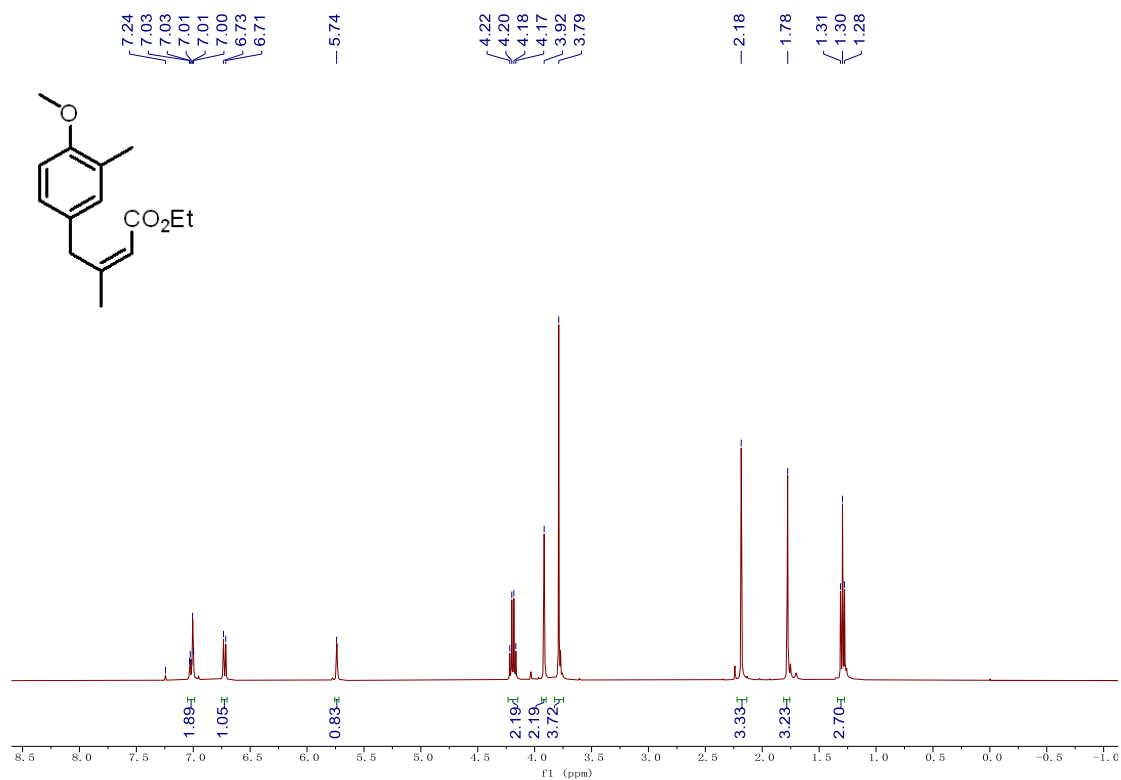

<sup>1</sup>H NMR spectrum for compound **3bb**

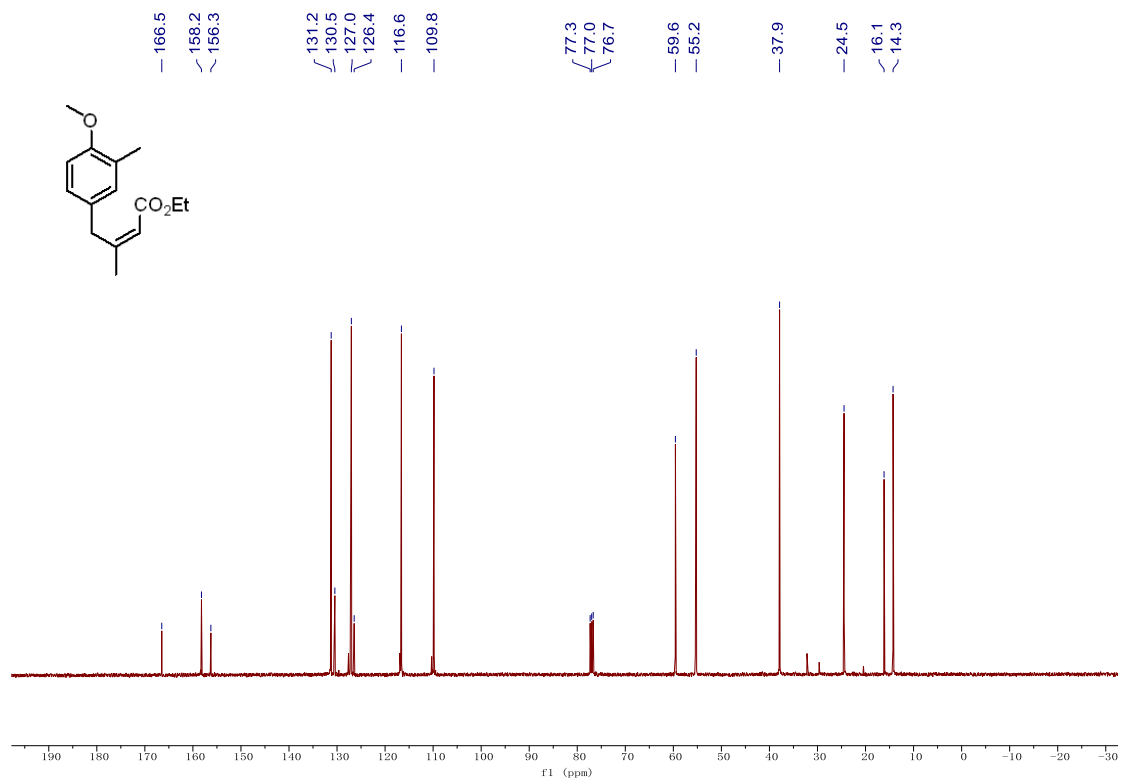

<sup>13</sup>C NMR spectrum for compound **3bb**

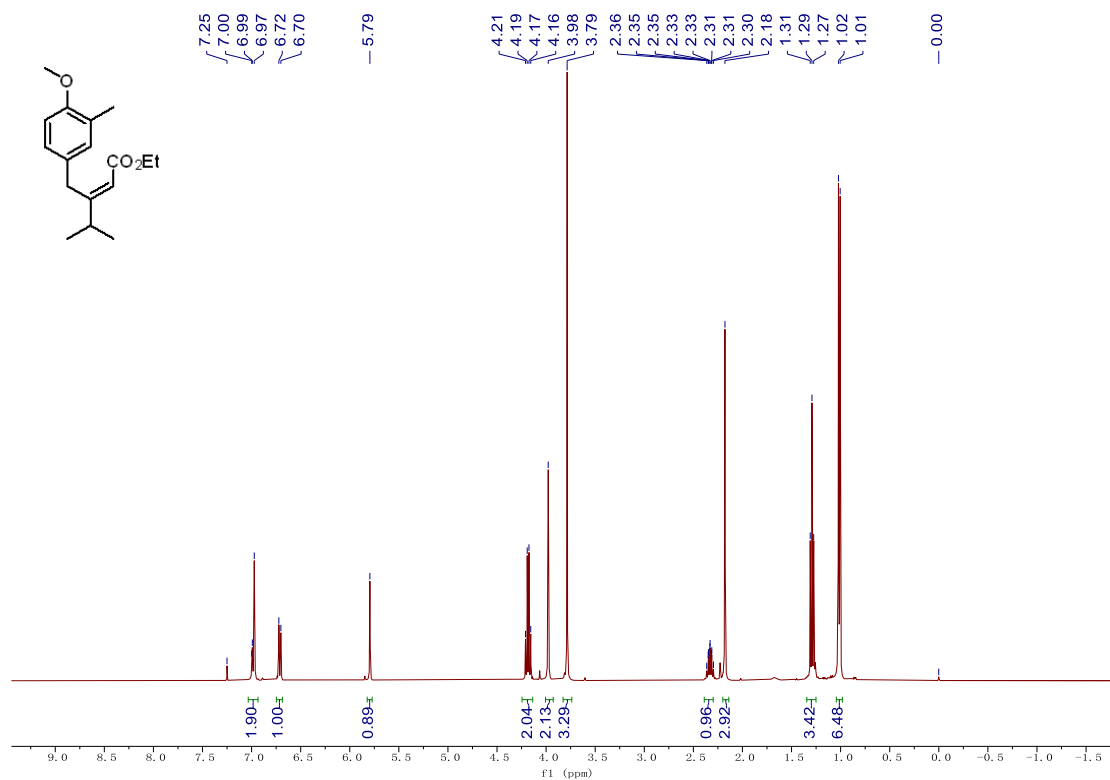

**<sup>1</sup>H NMR spectrum for compound 3cc**

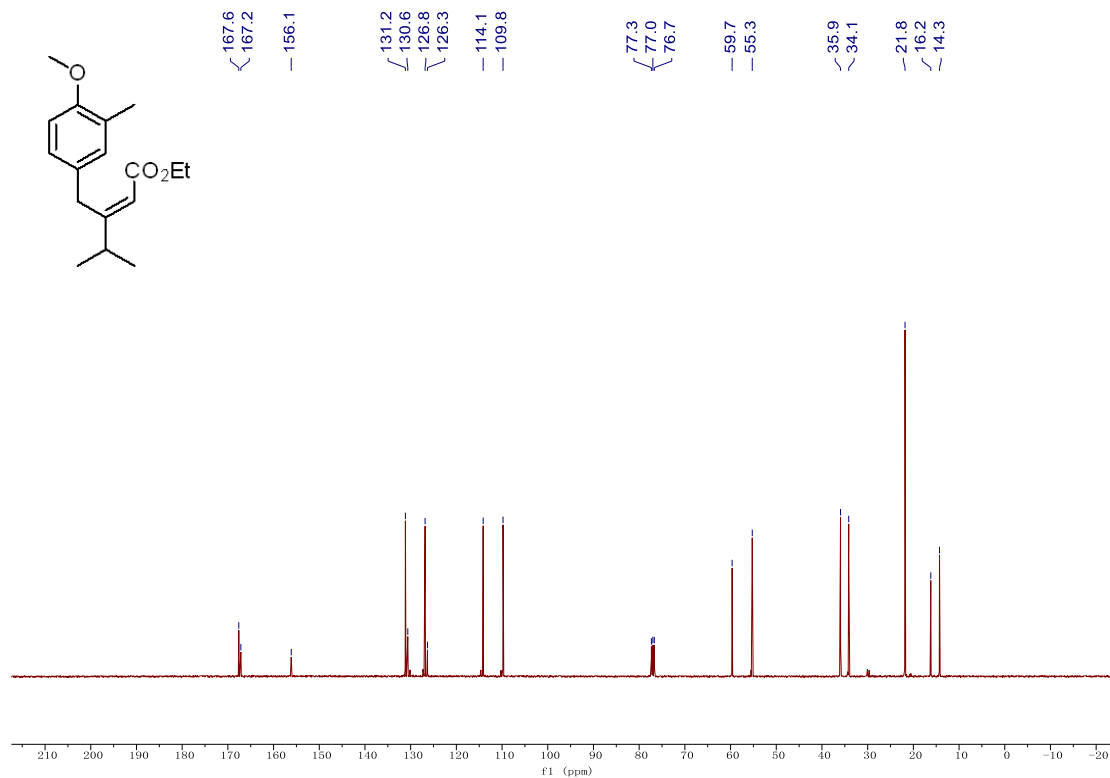

**<sup>13</sup>C NMR spectrum for compound 3cc**

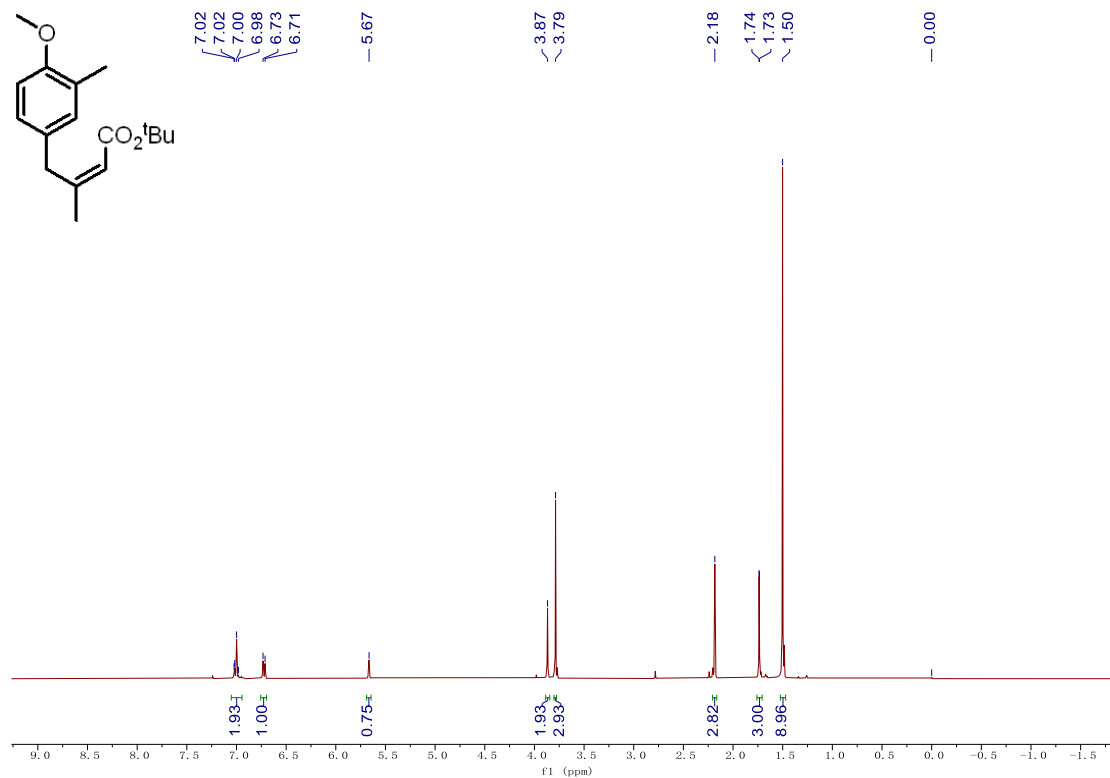

<sup>1</sup>H NMR spectrum for compound **3dd**

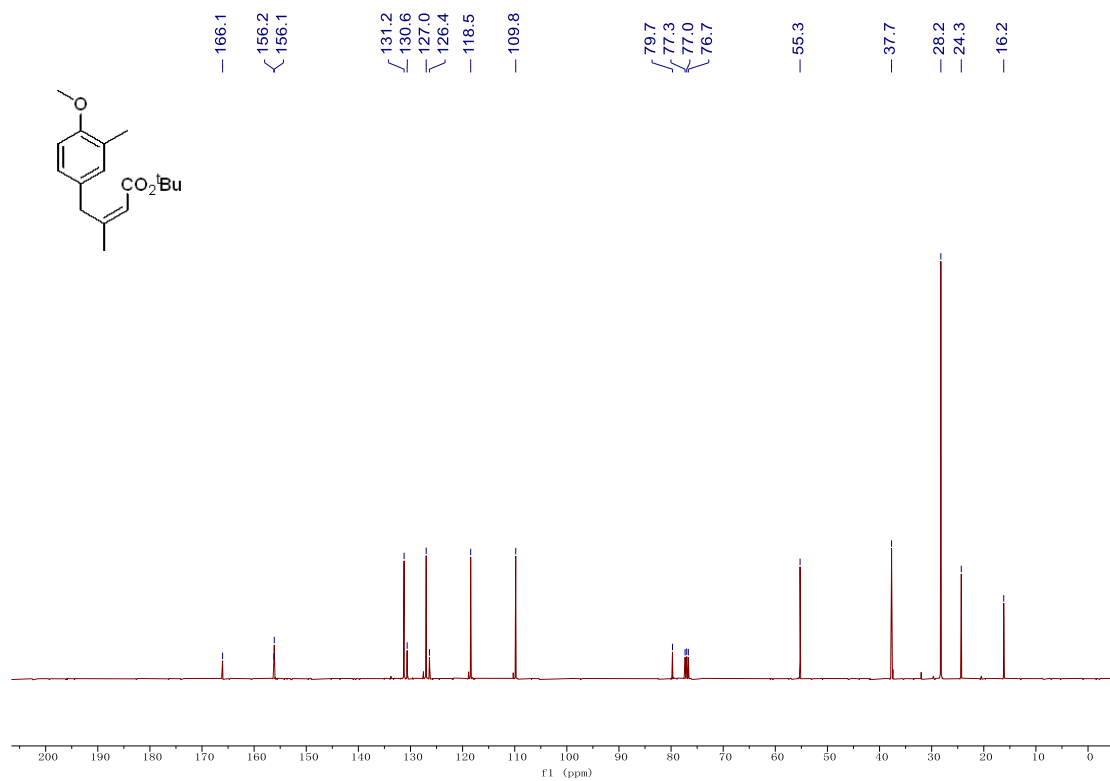

<sup>13</sup>C NMR spectrum for compound **3dd**

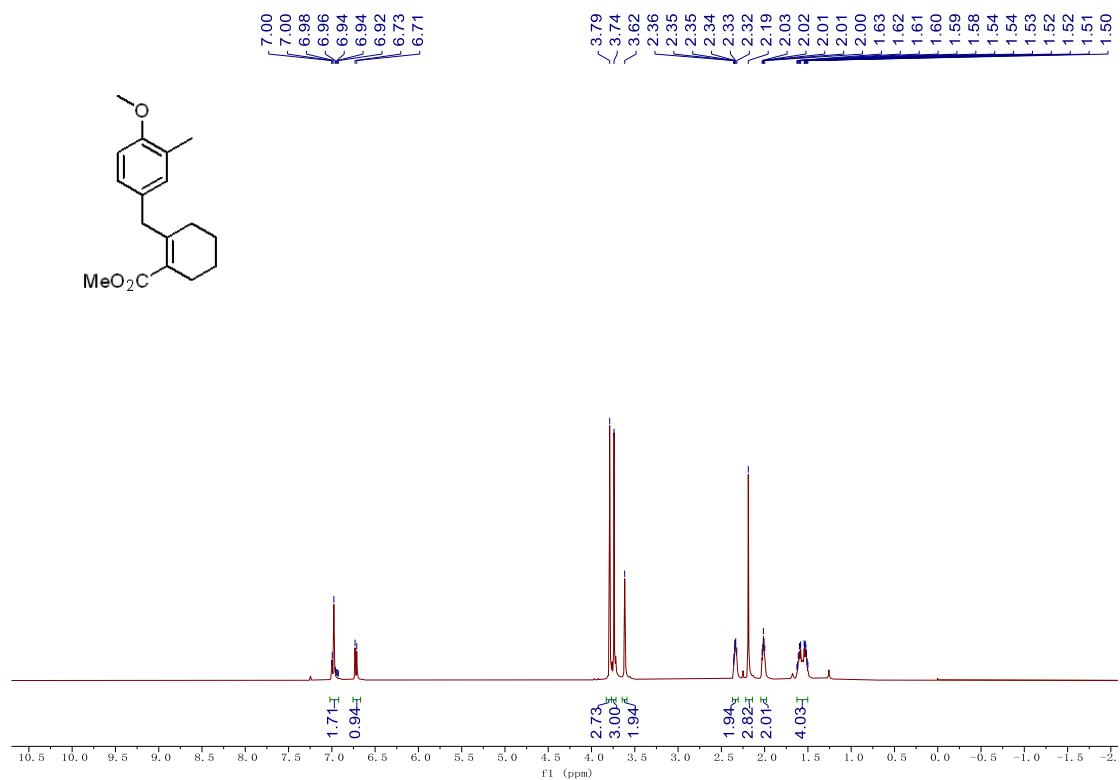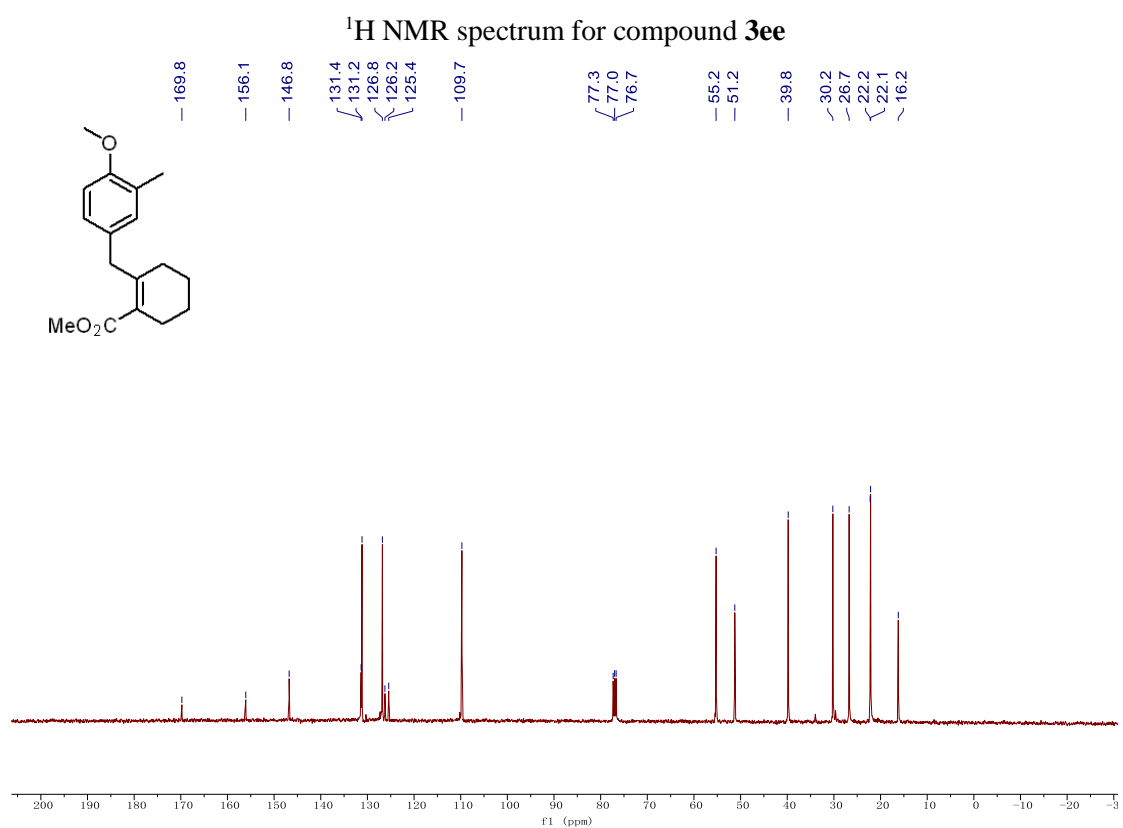

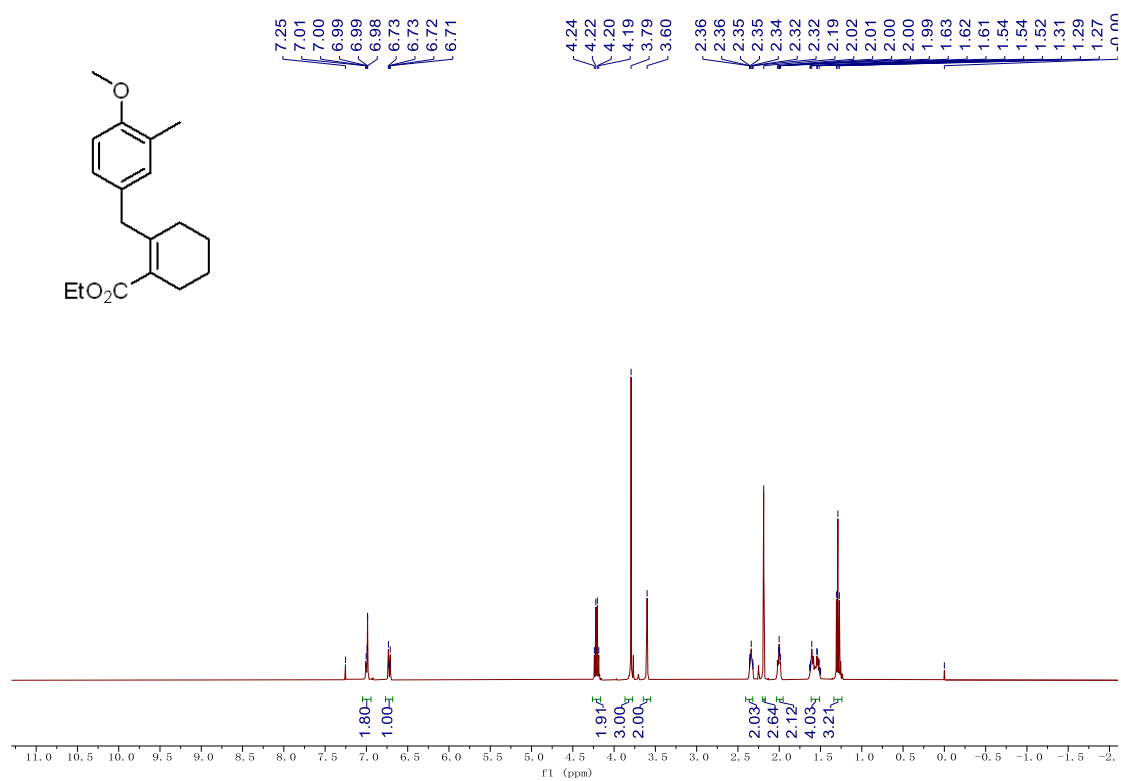

<sup>1</sup>H NMR spectrum for compound **3ff**

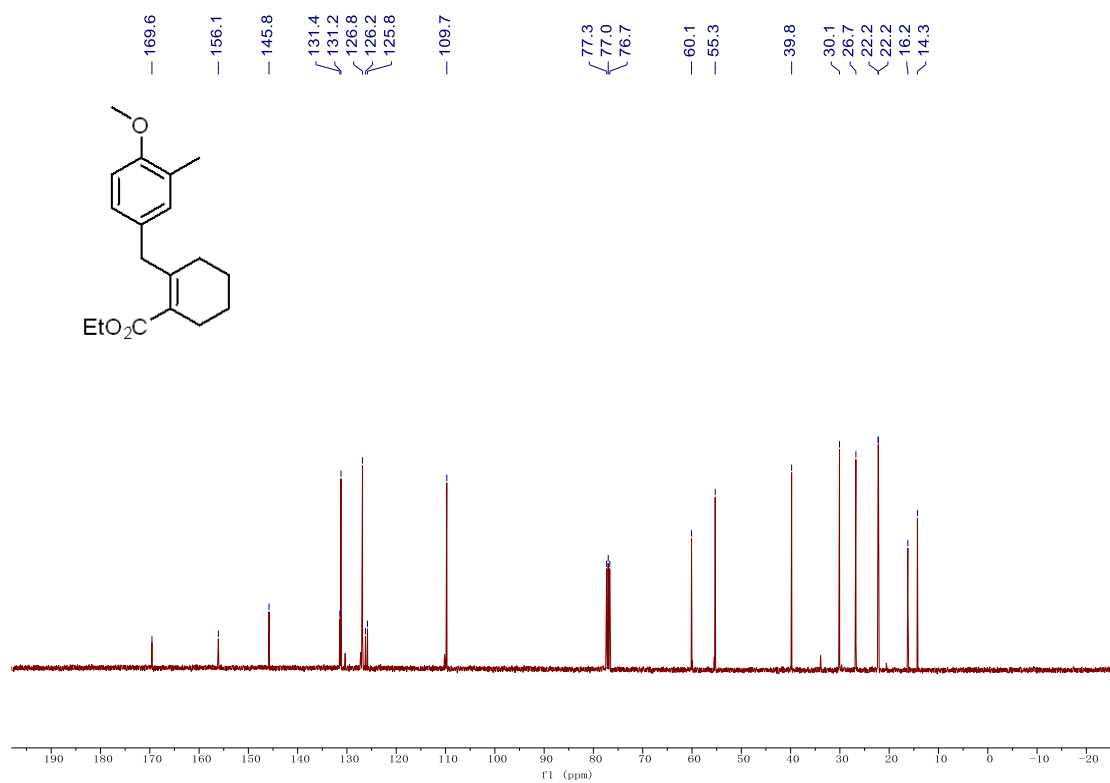

<sup>13</sup>C NMR spectrum for compound **3ff**

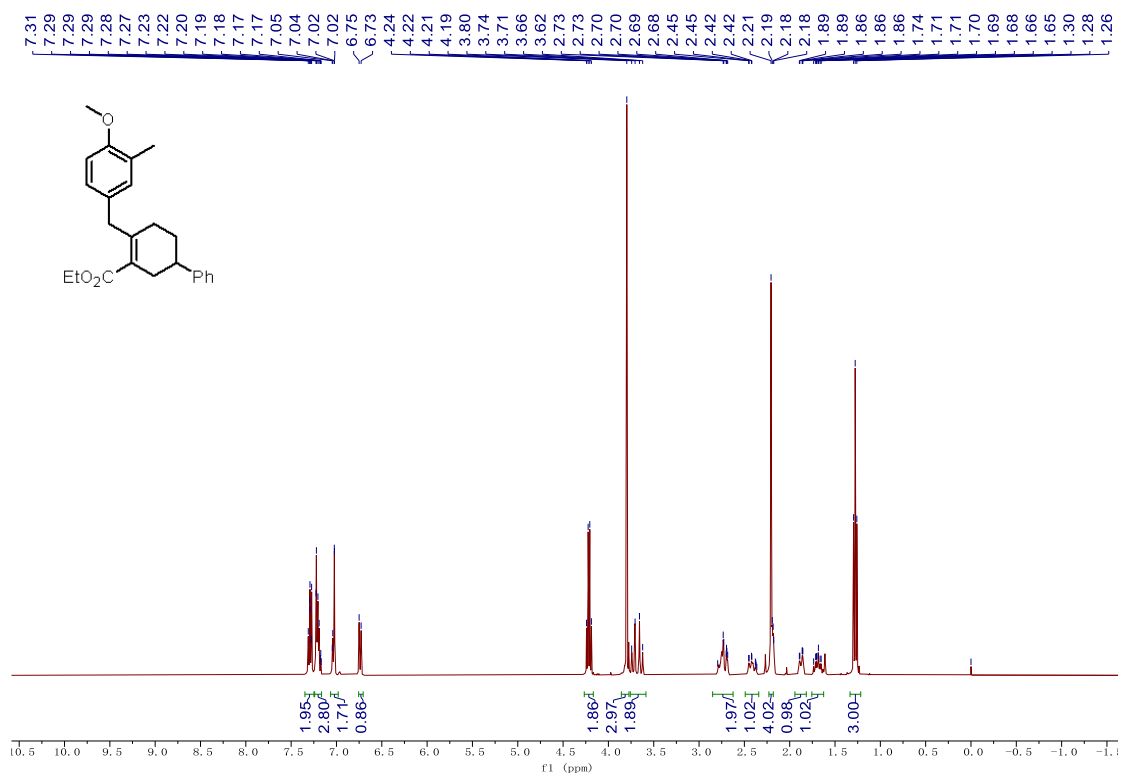

**<sup>1</sup>H NMR spectrum for compound 3gg**

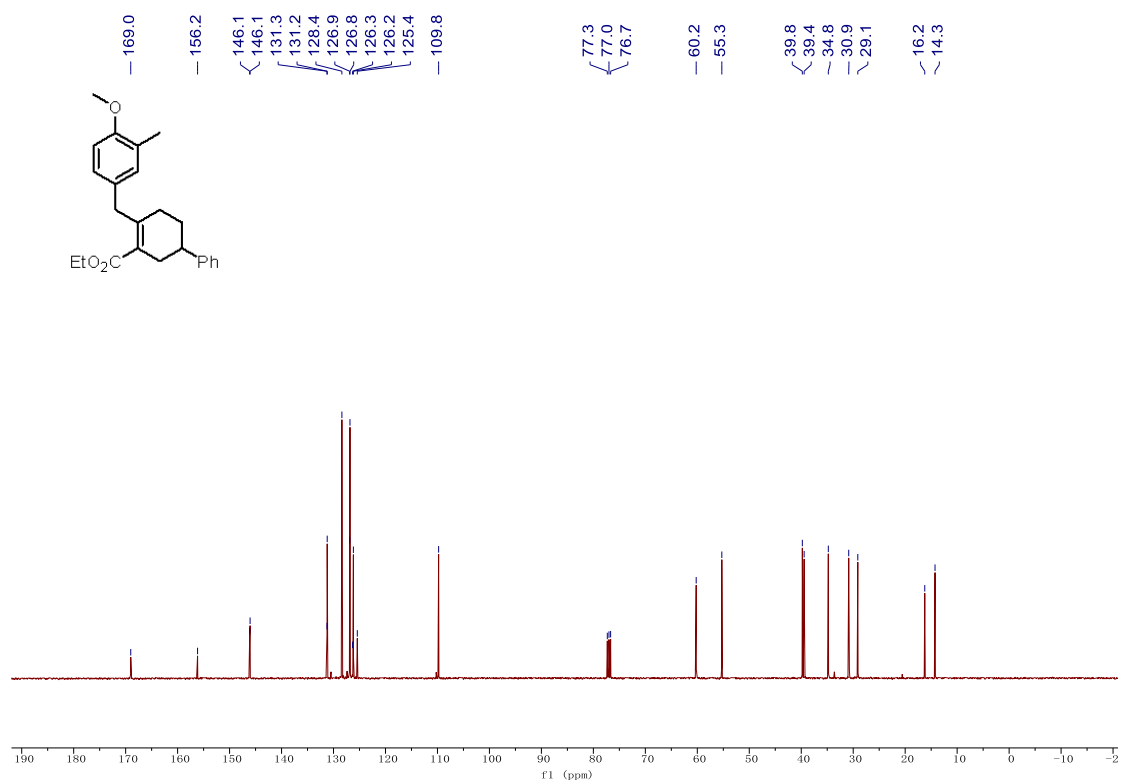

**<sup>13</sup>C NMR spectrum for compound 3gg**

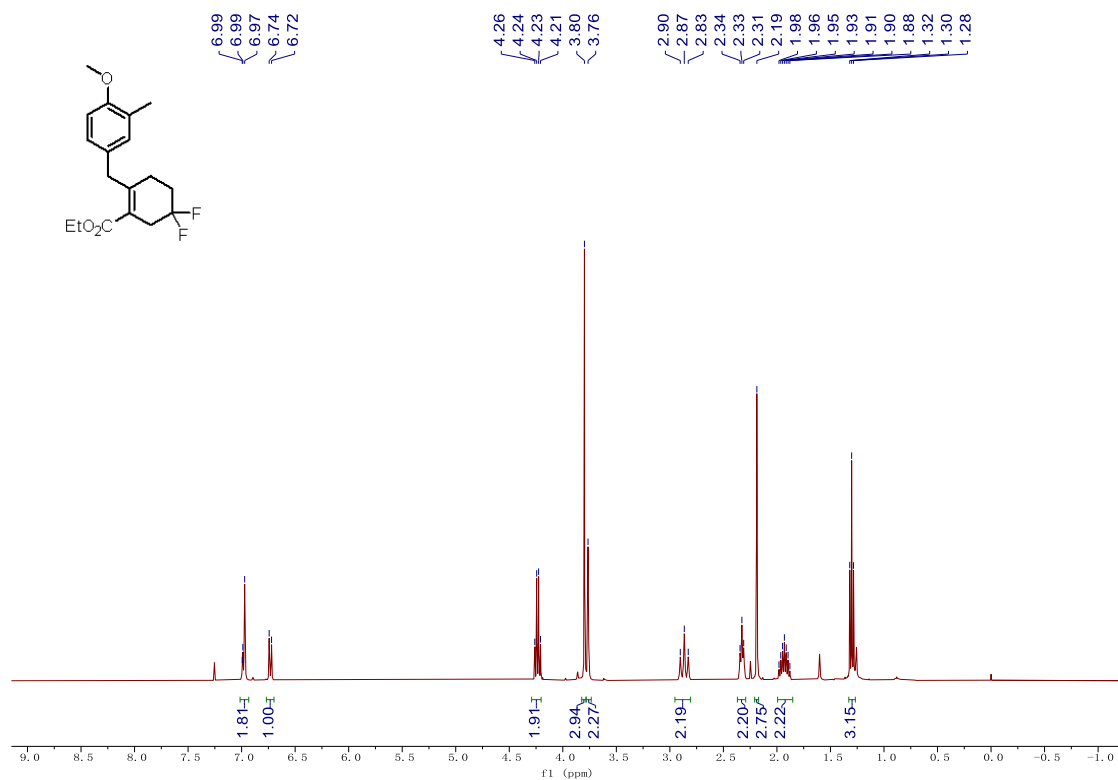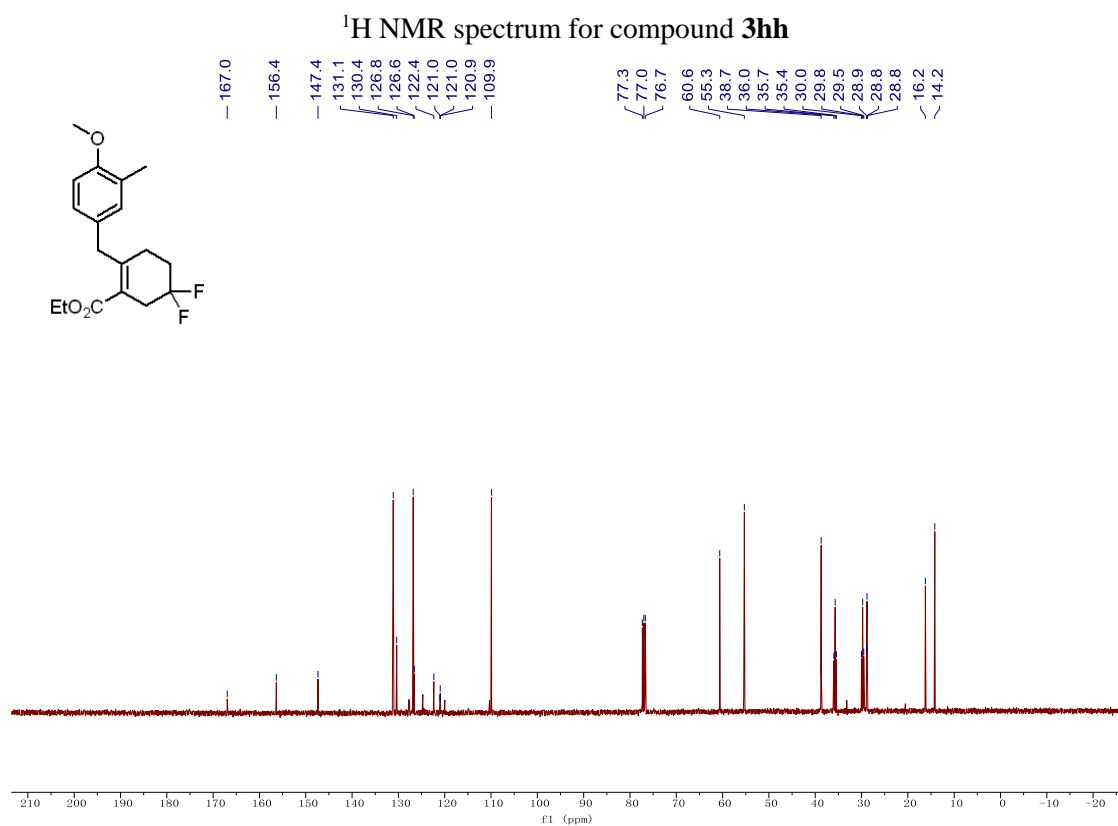



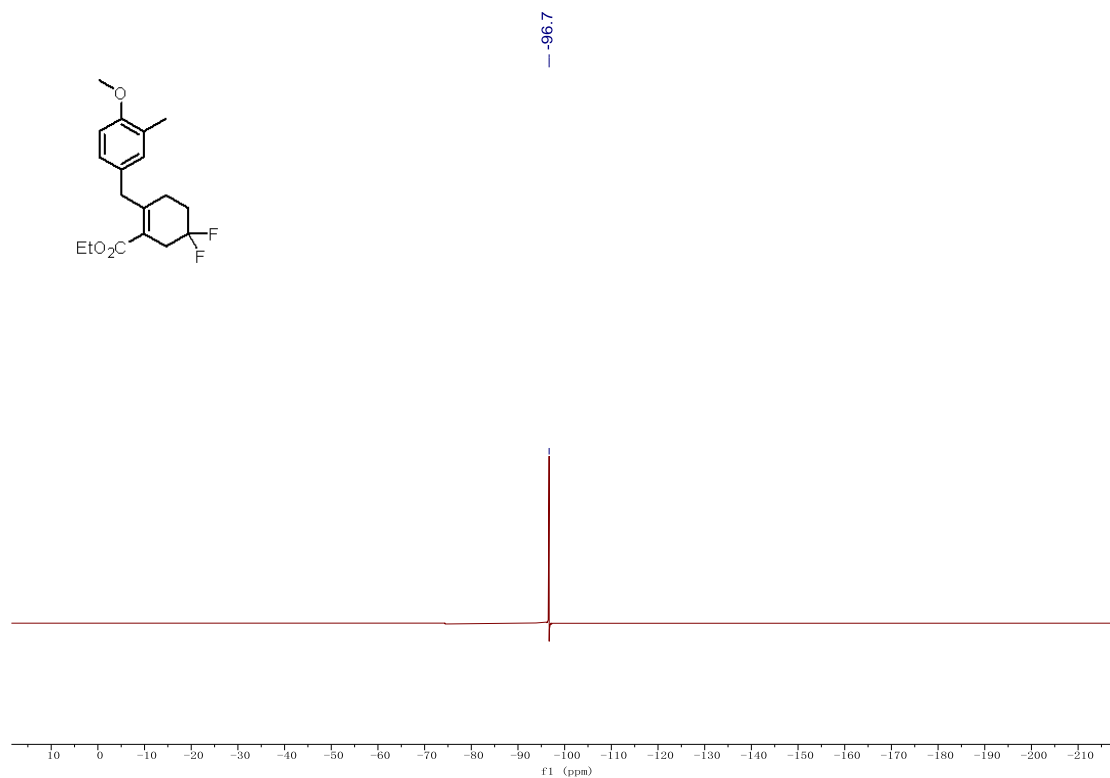

$^{19}\text{F}$  NMR spectrum for compound **3hh**

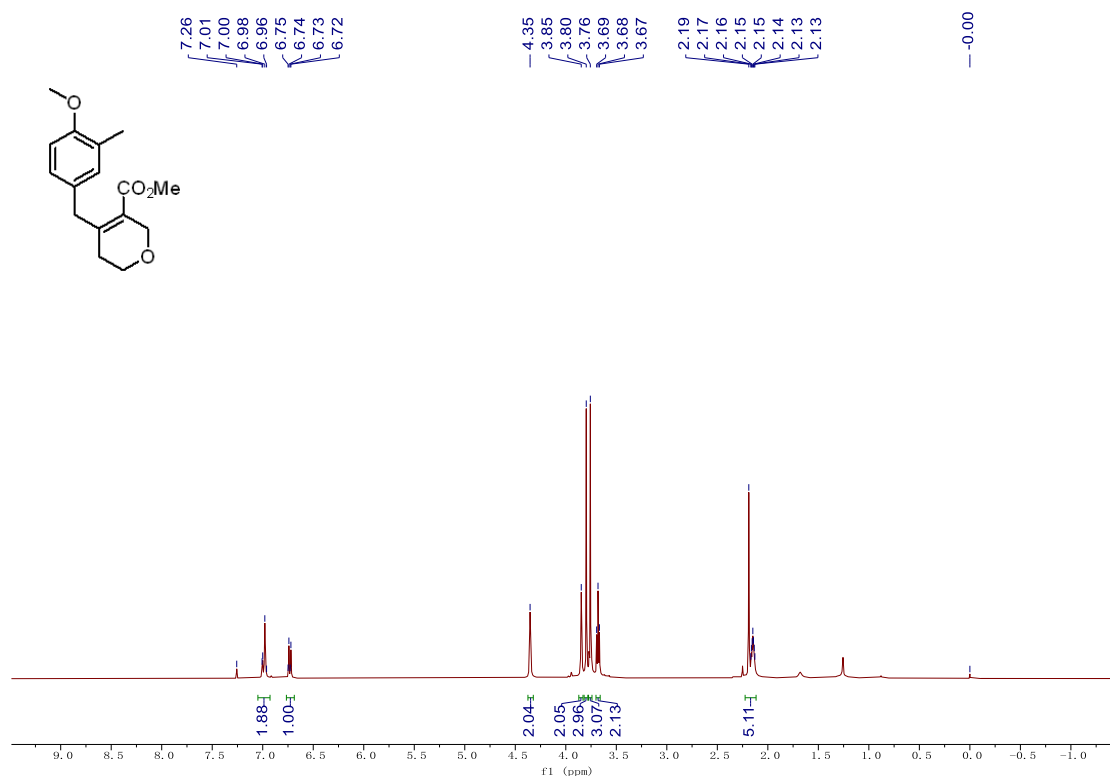

$^1\text{H}$  NMR spectrum for compound **3ii**

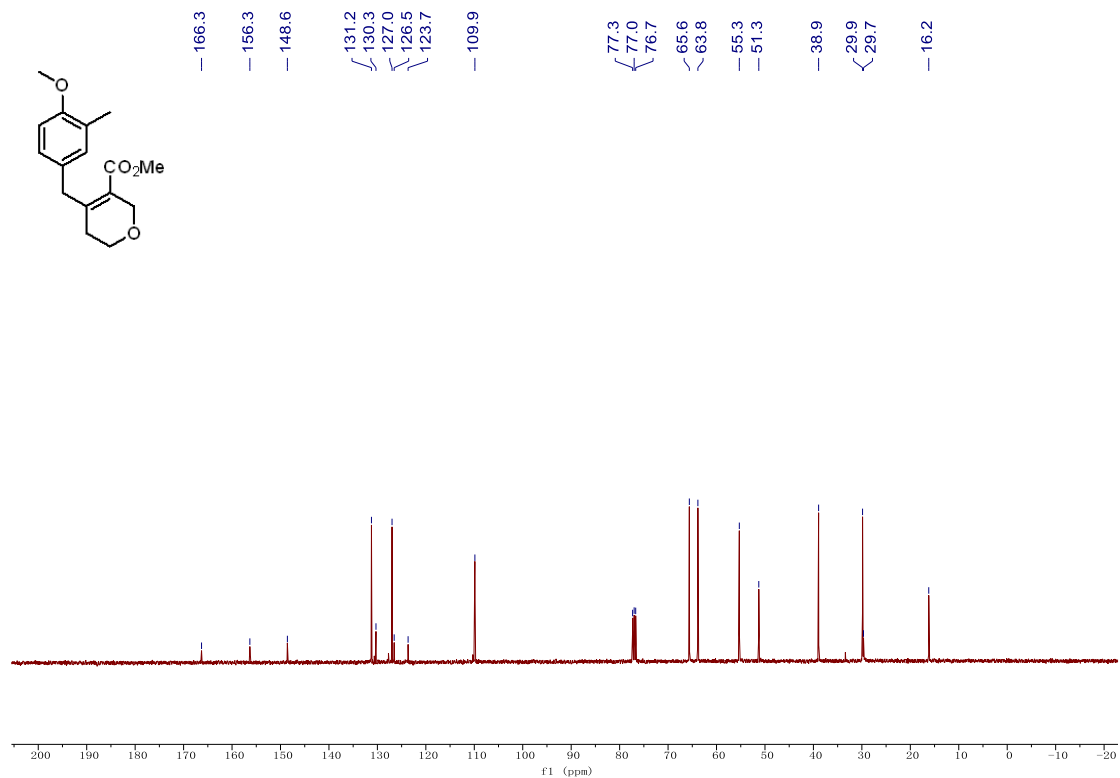

<sup>13</sup>C NMR spectrum for compound **3ii**

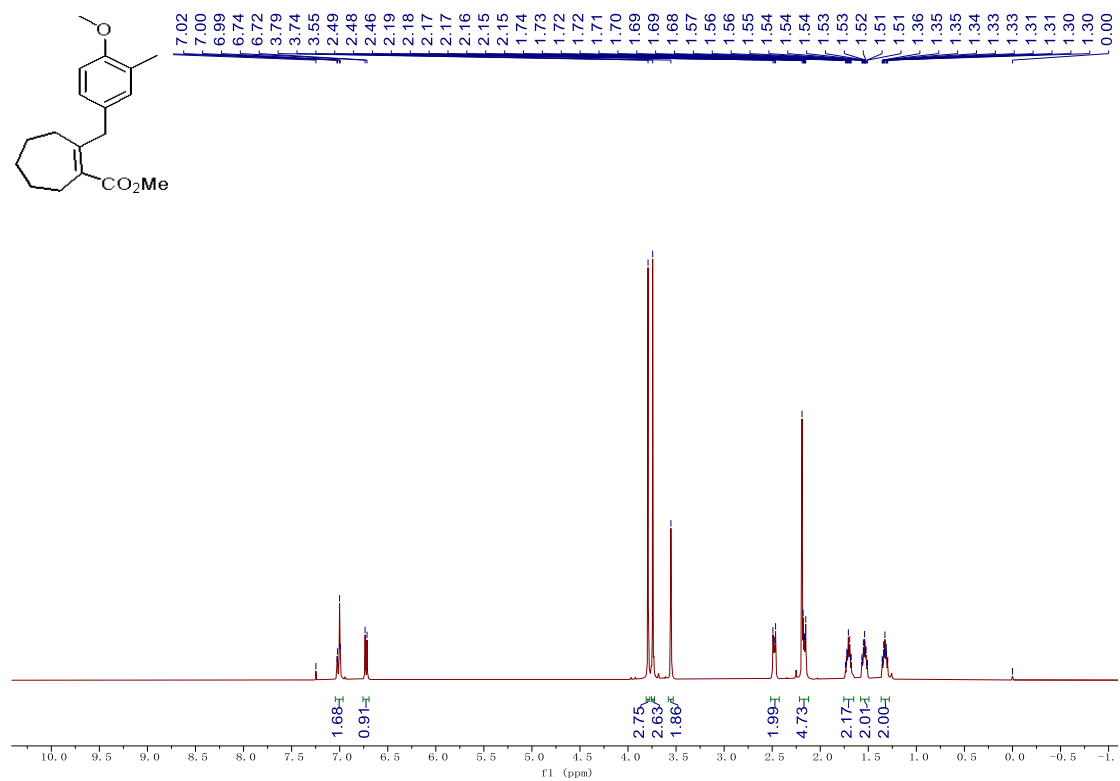

<sup>1</sup>H NMR spectrum for compound **3jj**

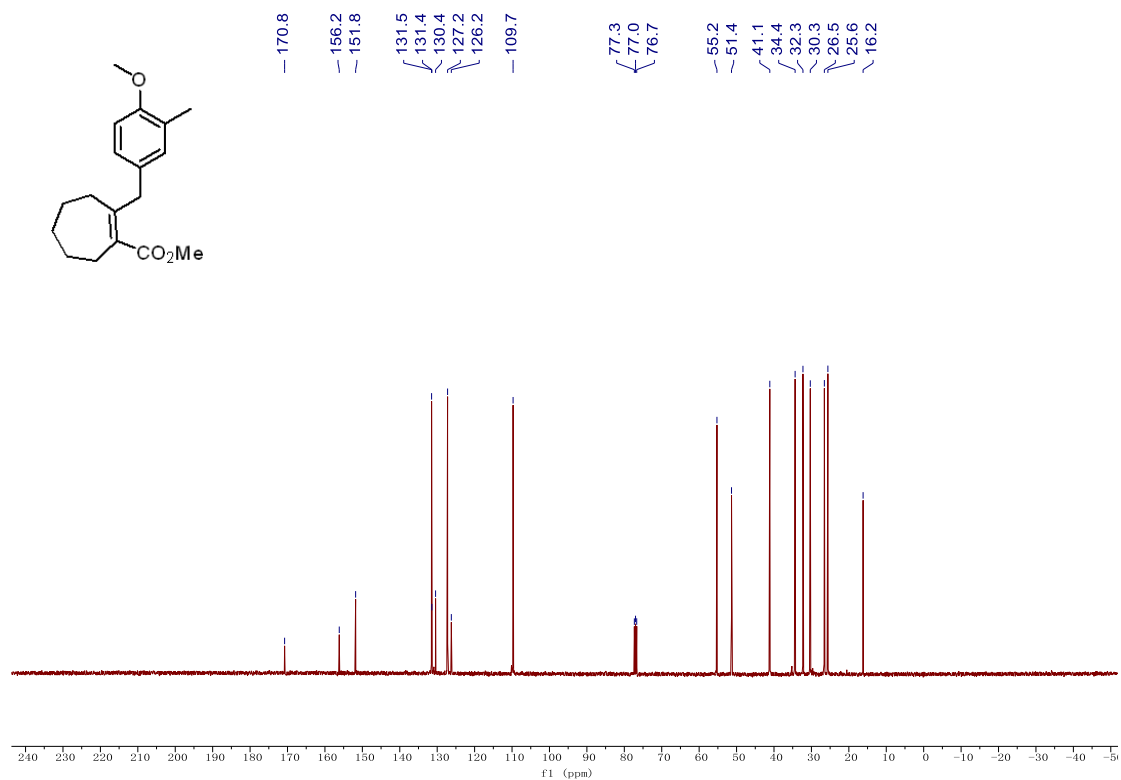

$^{13}\text{C}$  NMR spectrum for compound **3jj**

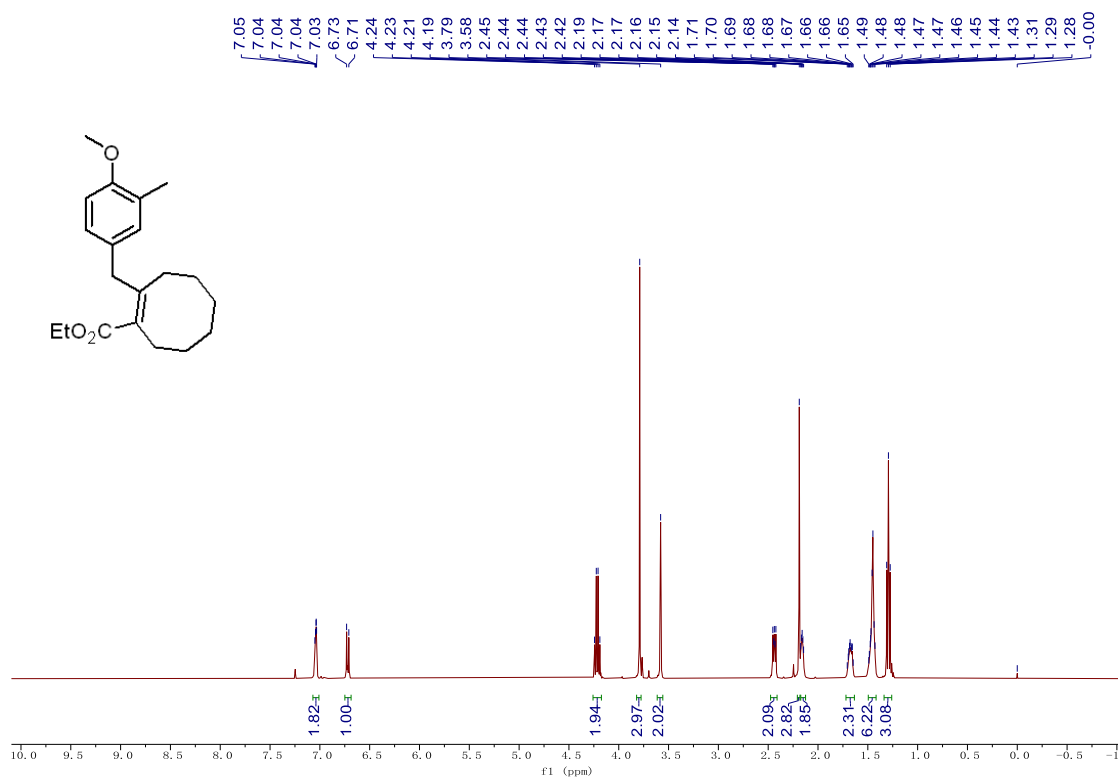

<sup>1</sup>H NMR spectrum for compound 3kk

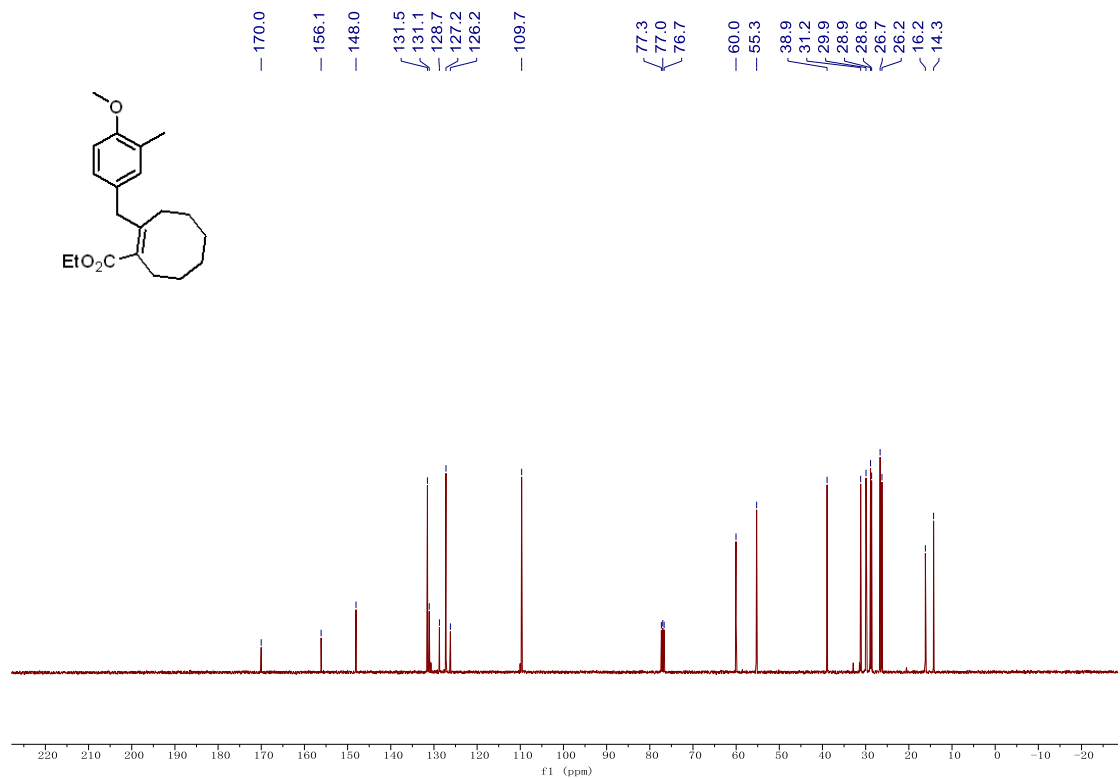

<sup>13</sup>C NMR spectrum for compound 3kk

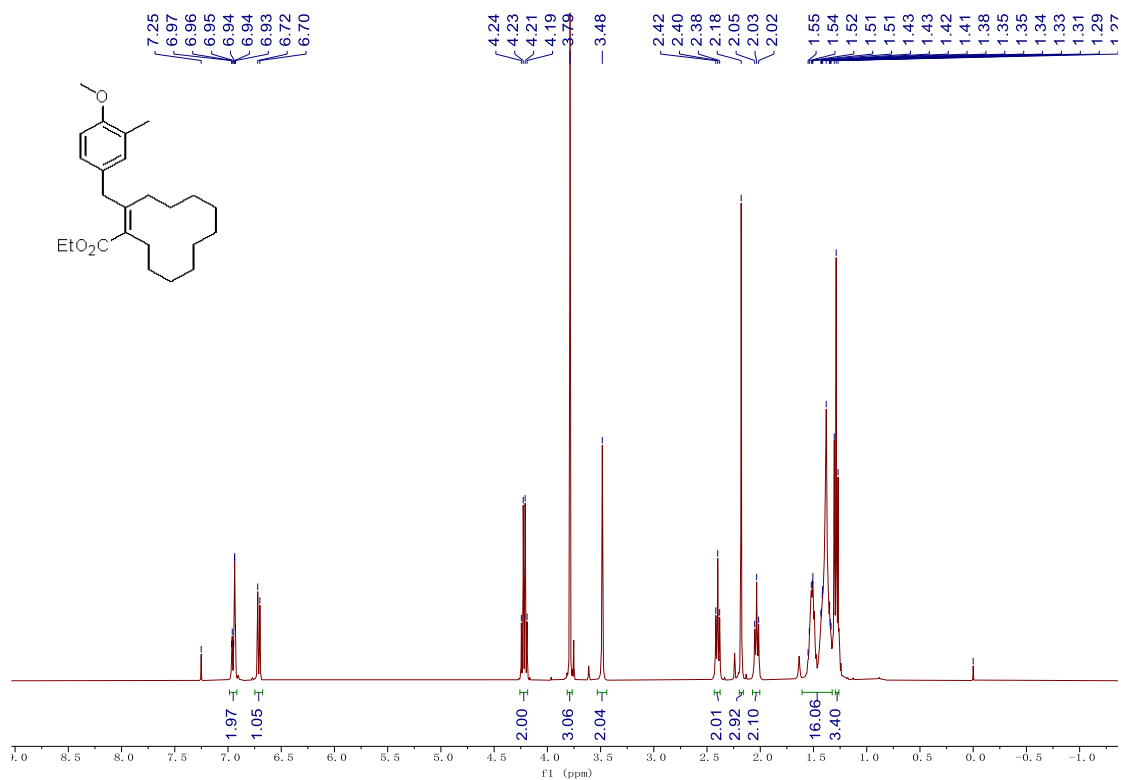

**<sup>1</sup>H NMR spectrum for compound 3II**

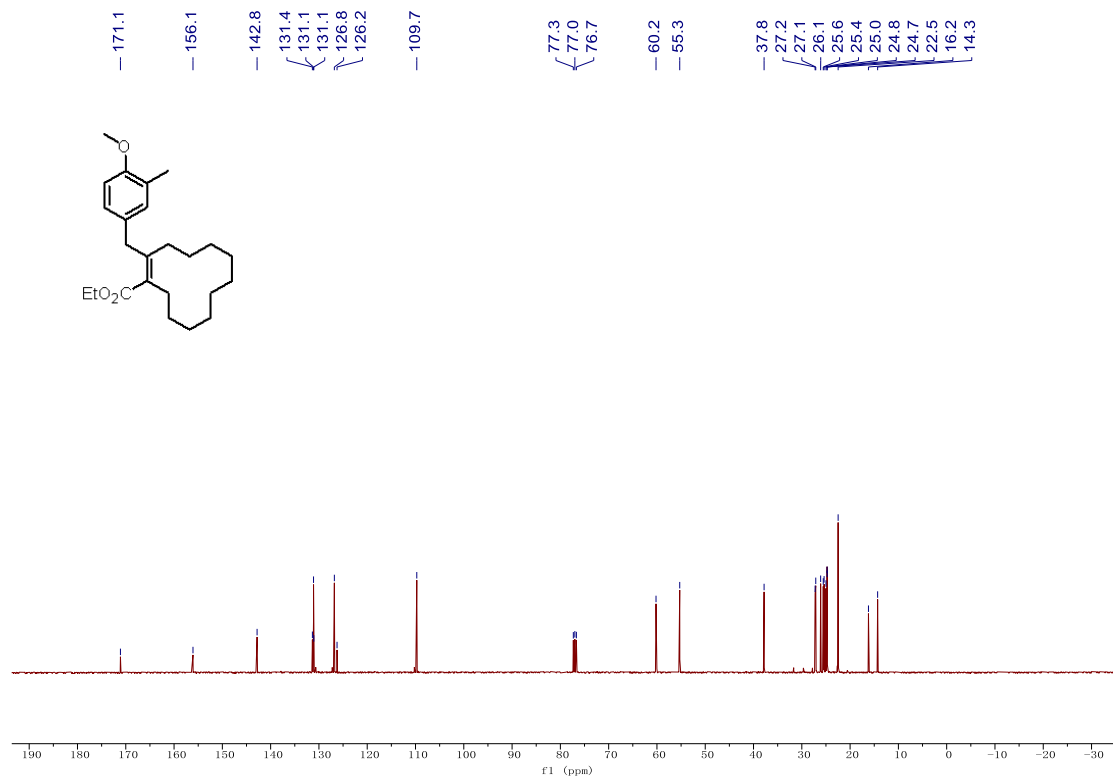

**<sup>13</sup>C NMR spectrum for compound 3II**

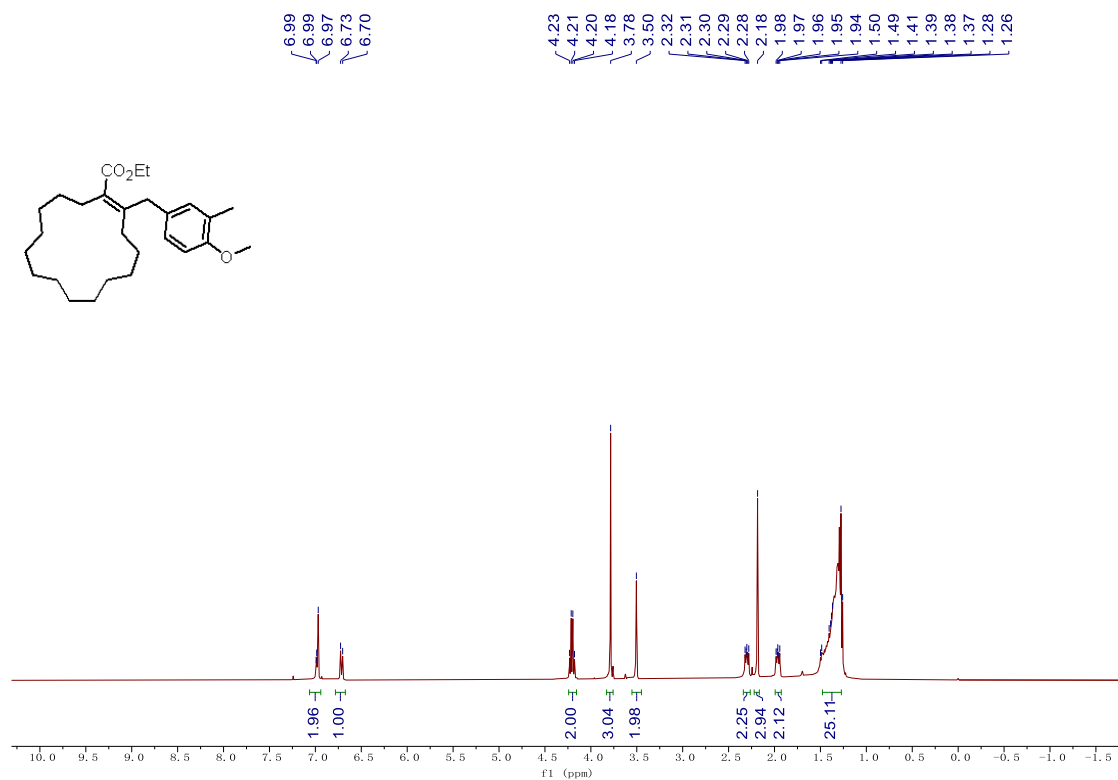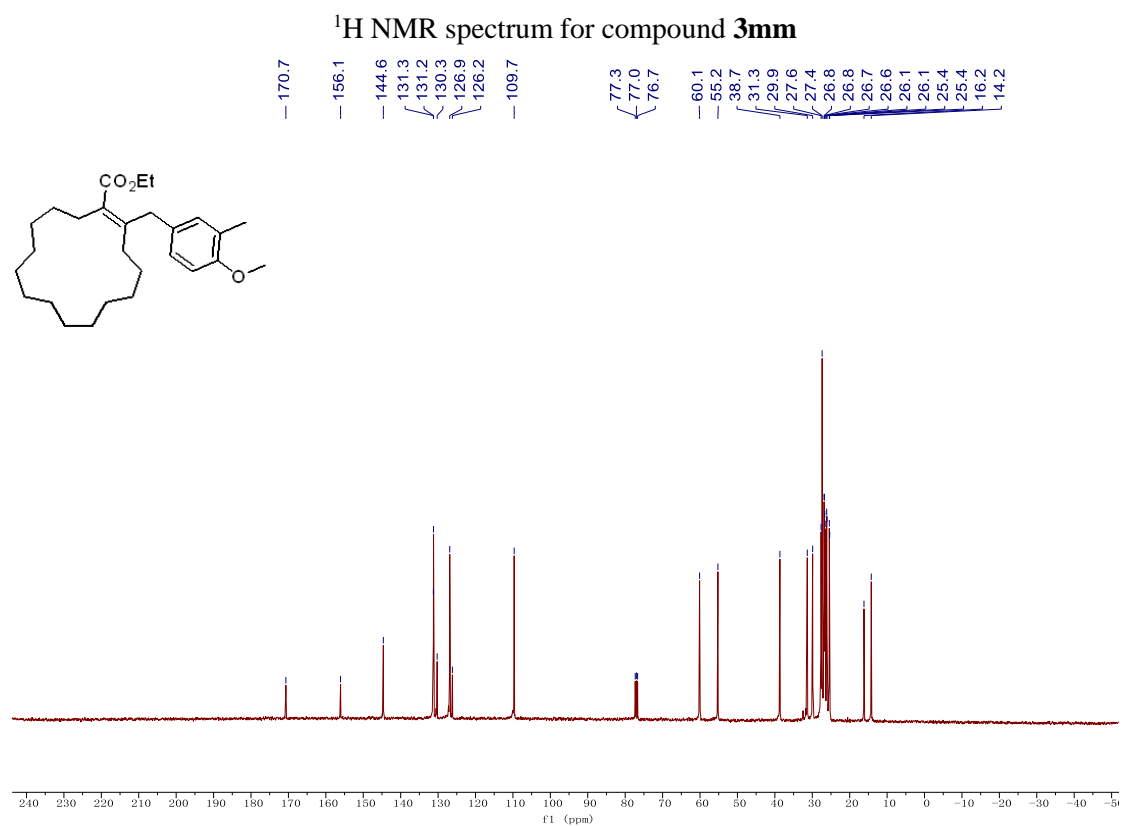

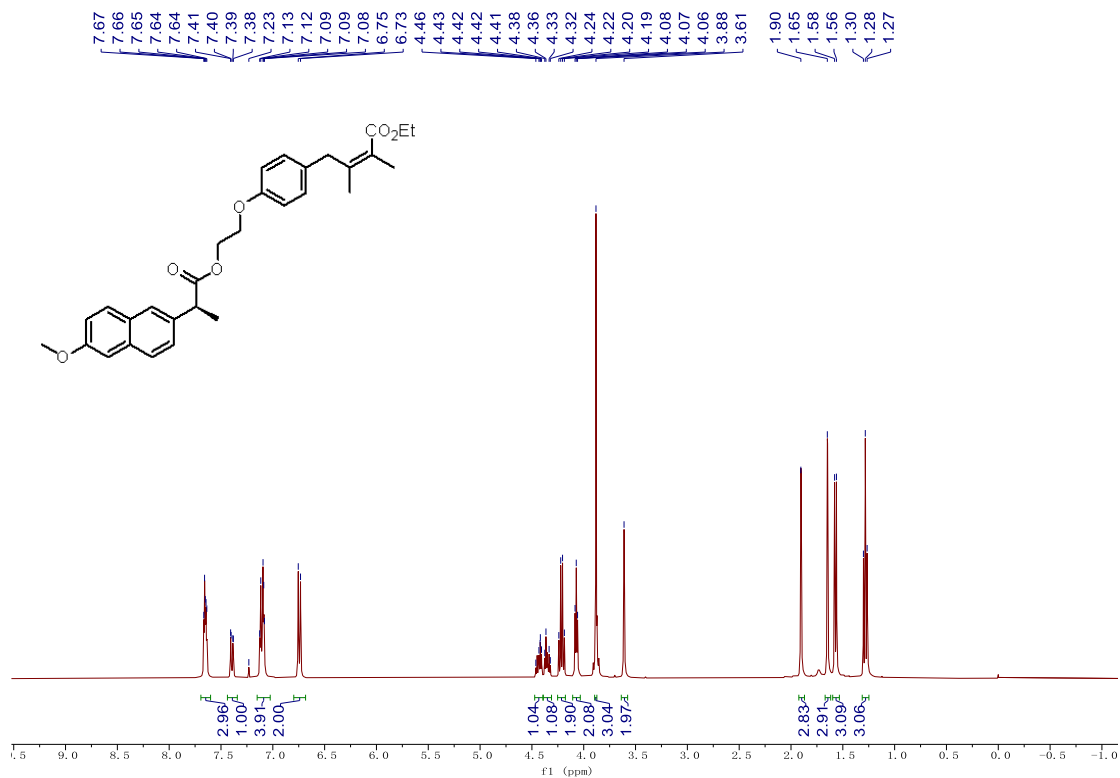

<sup>1</sup>H NMR spectrum for compound 4a

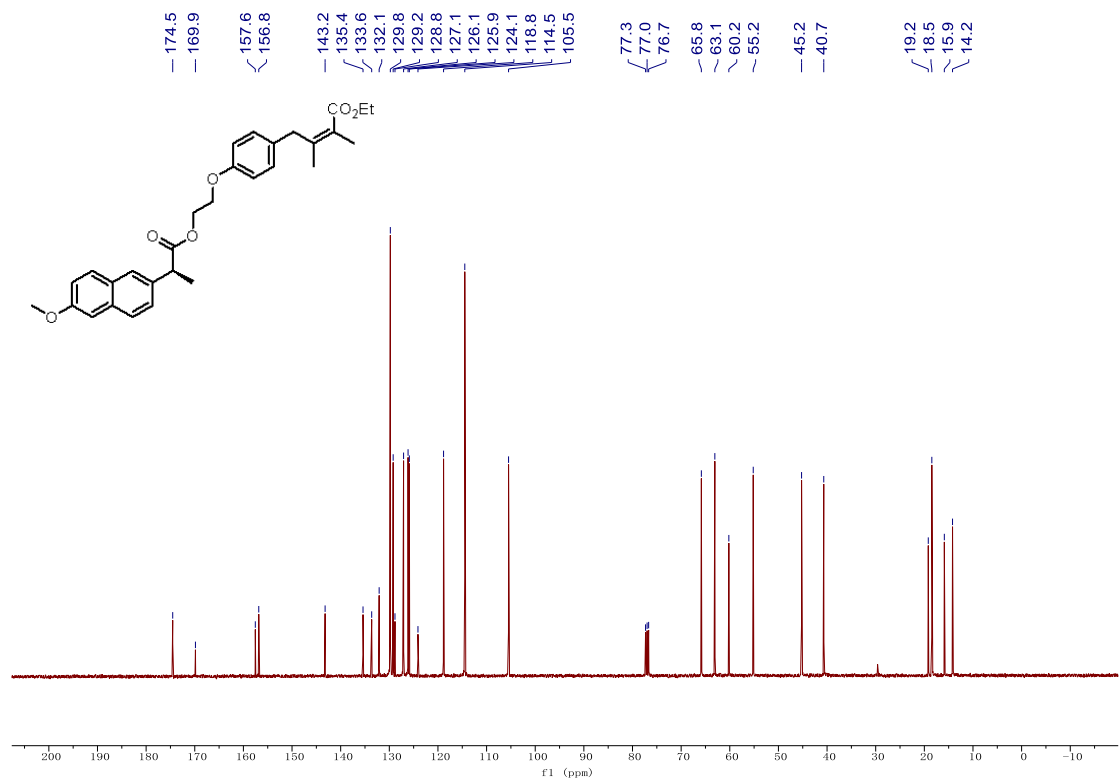

<sup>13</sup>C NMR spectrum for compound 4a

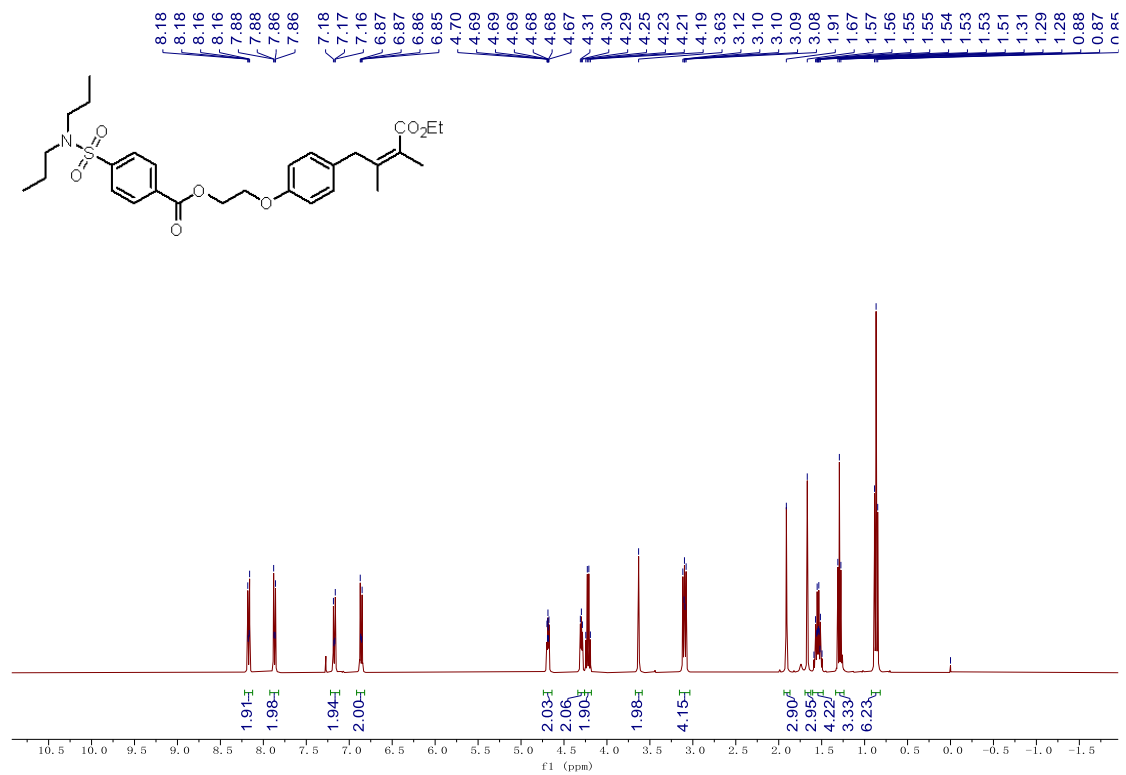

**<sup>1</sup>H NMR spectrum for compound 4b**

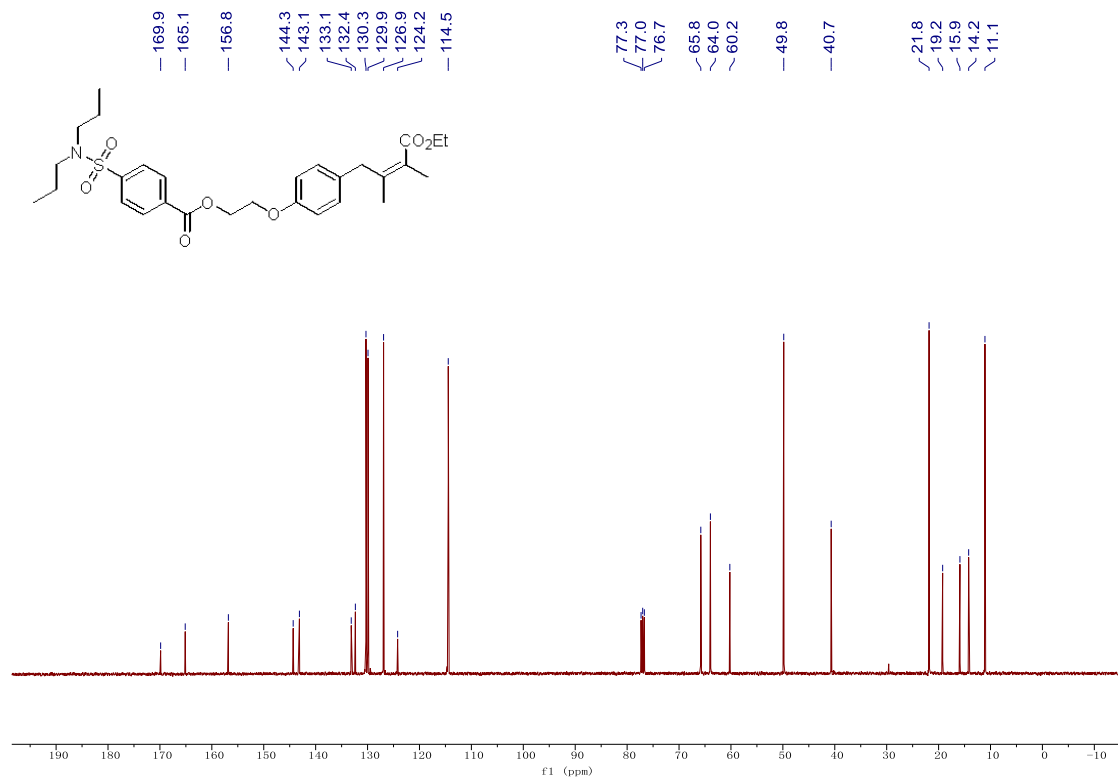

**<sup>13</sup>C NMR spectrum for compound 4b**



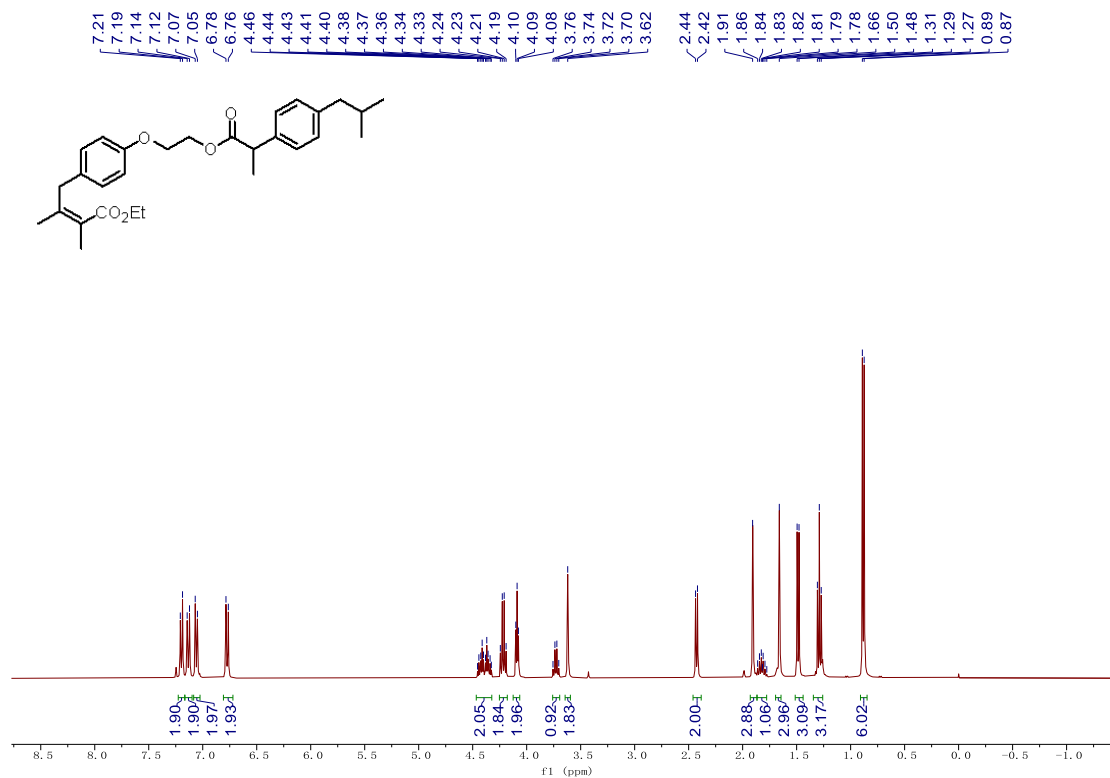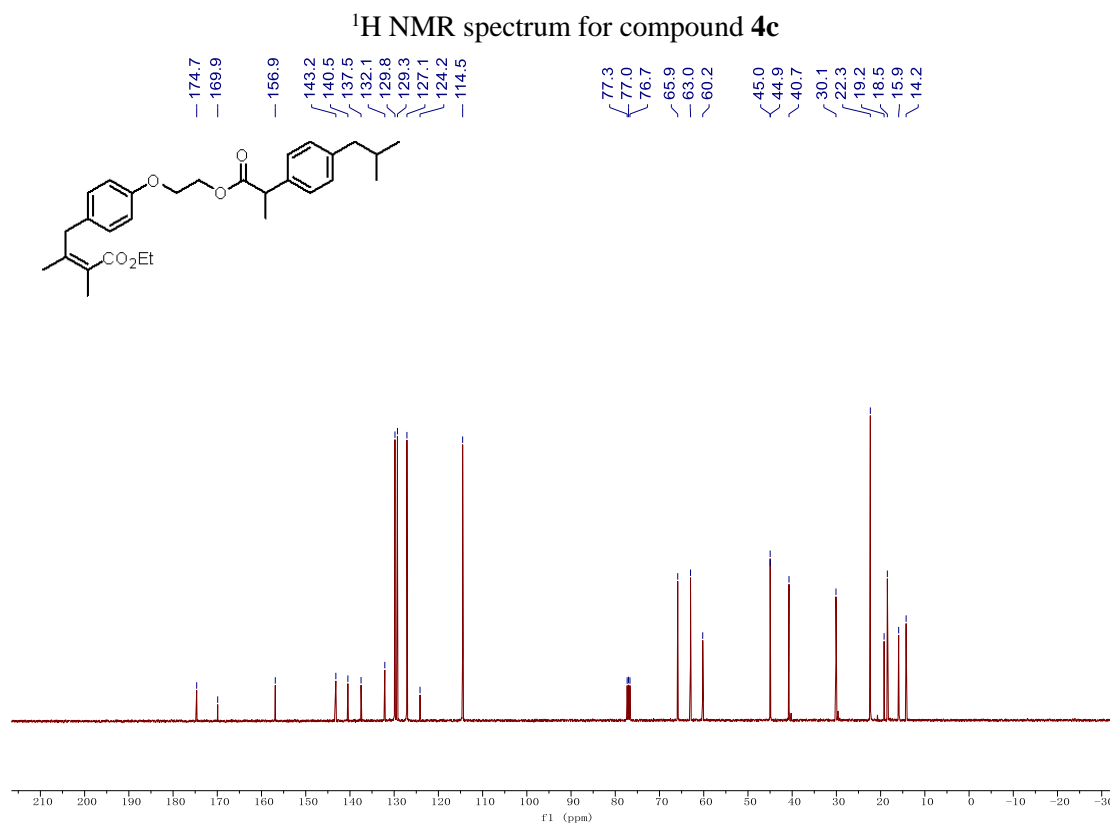

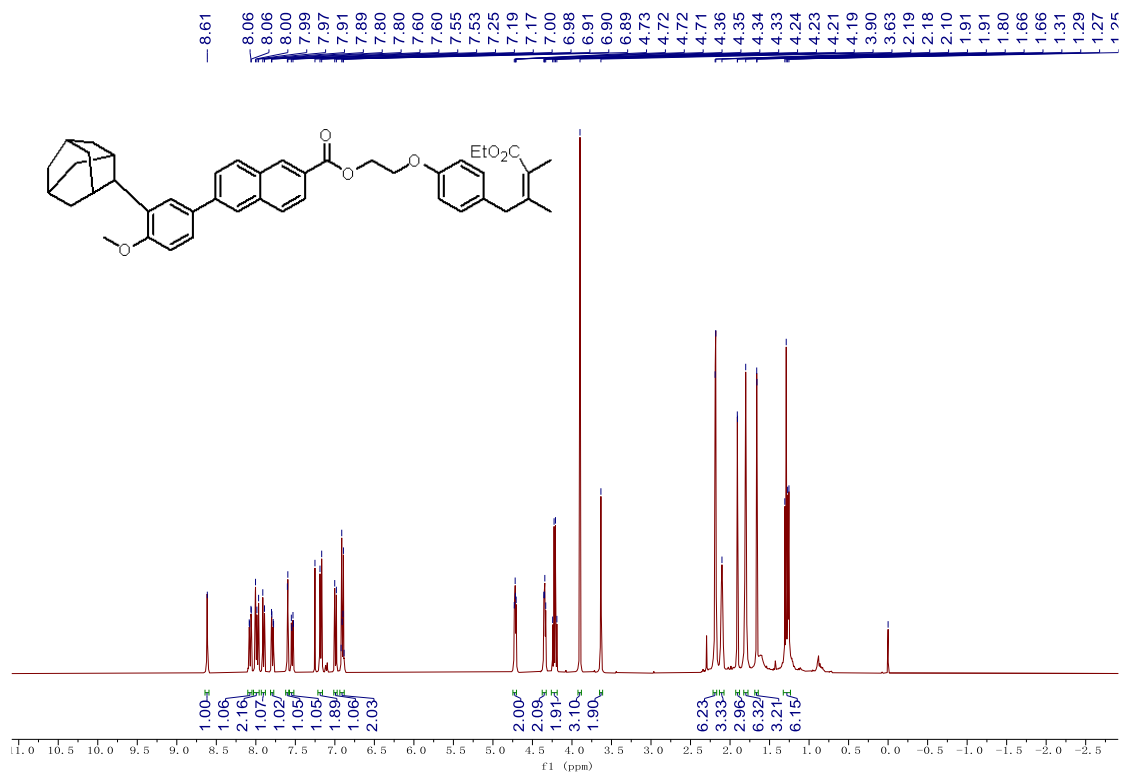

**<sup>1</sup>H NMR spectrum for compound 4d**

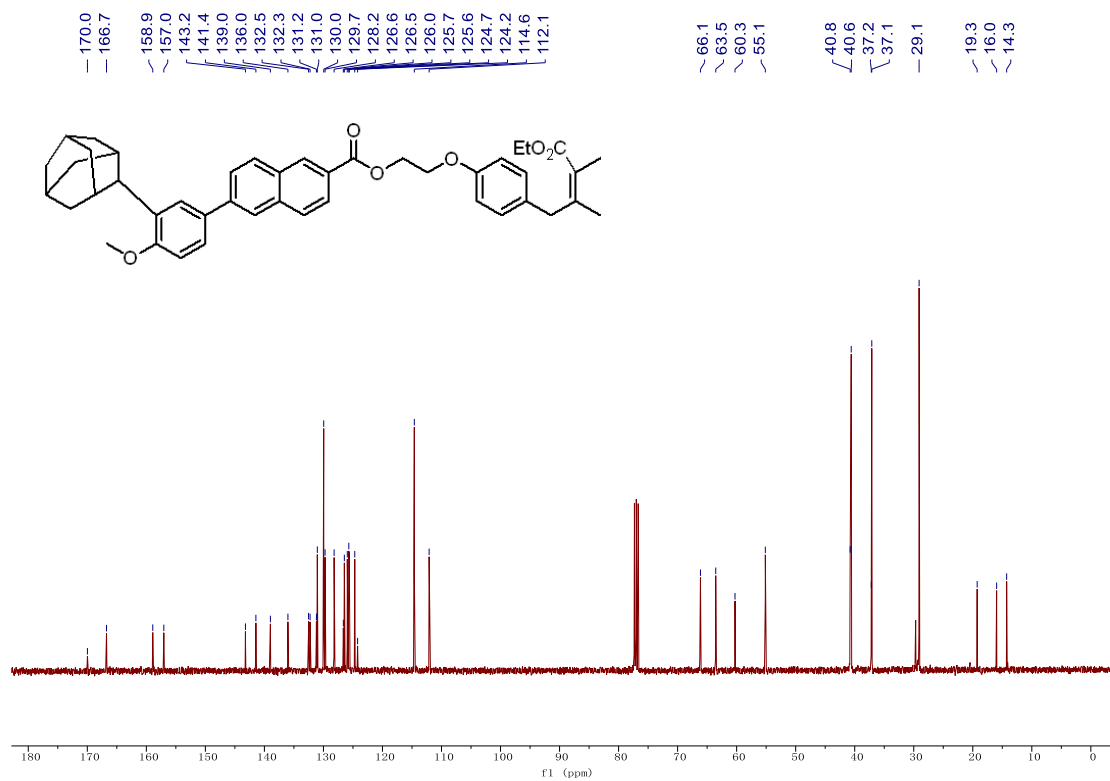

**<sup>13</sup>C NMR spectrum for compound 4d**

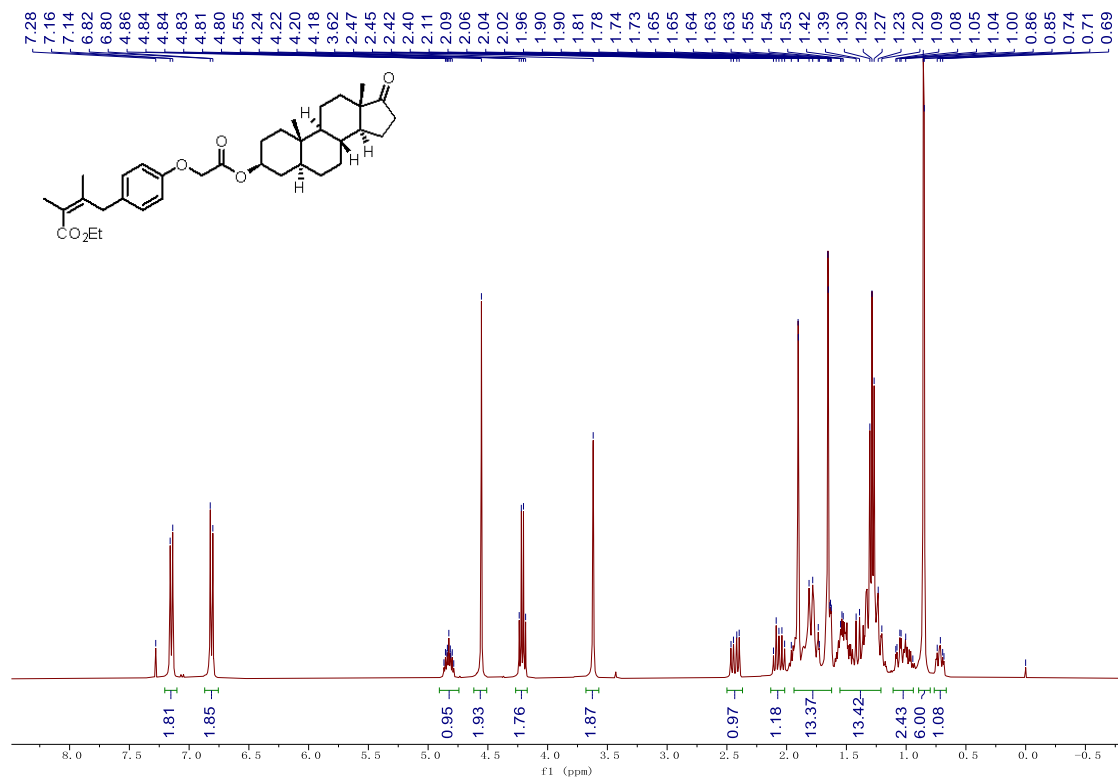

<sup>1</sup>H NMR spectrum for compound 4e

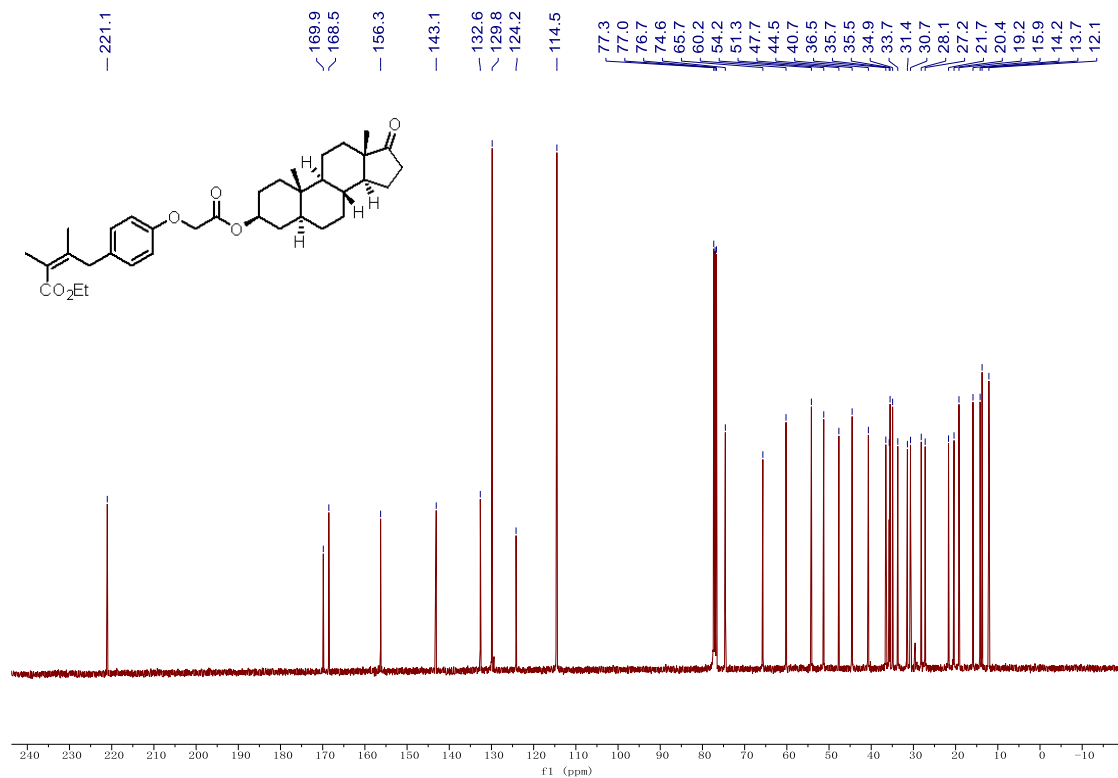

<sup>13</sup>C NMR spectrum for compound 4e

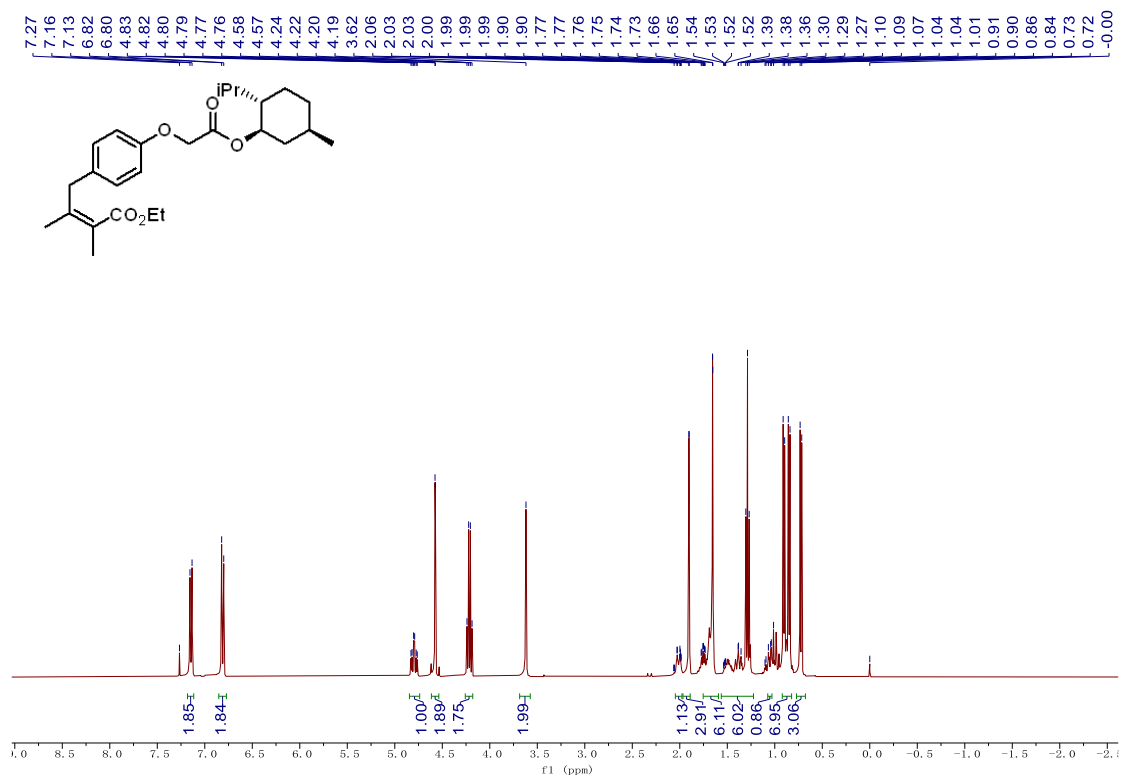

<sup>1</sup>H NMR spectrum for compound 4f

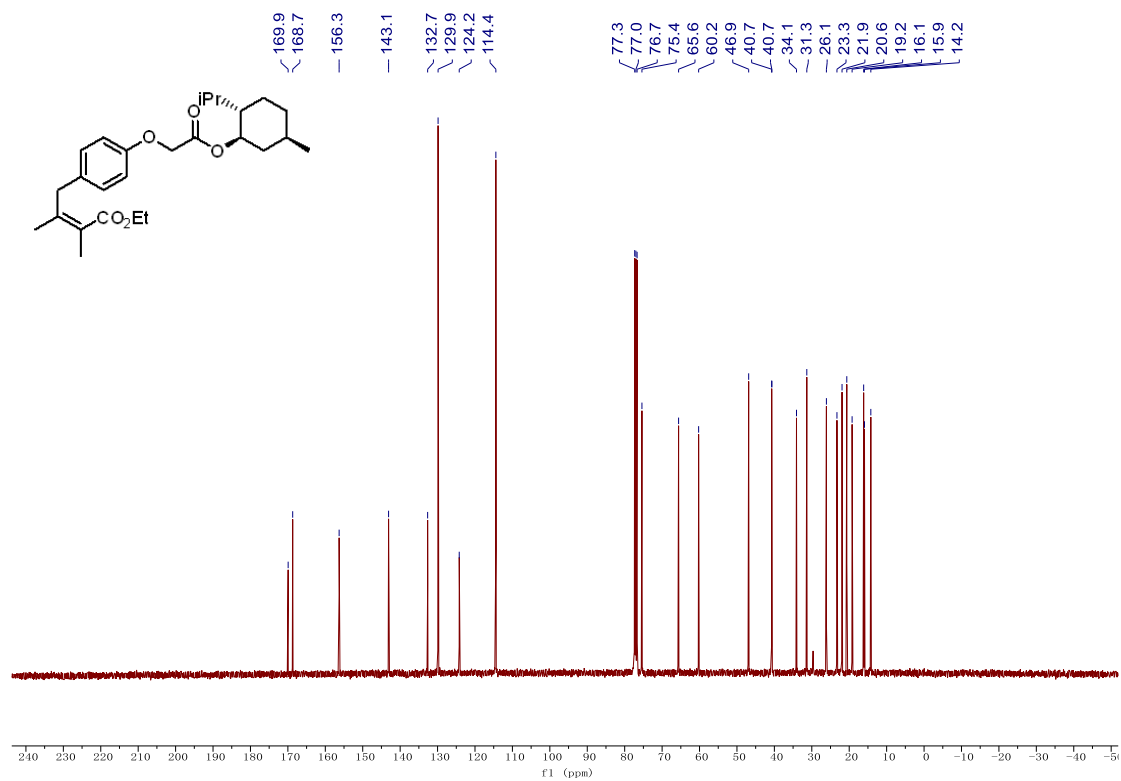

<sup>13</sup>C NMR spectrum for compound 4f

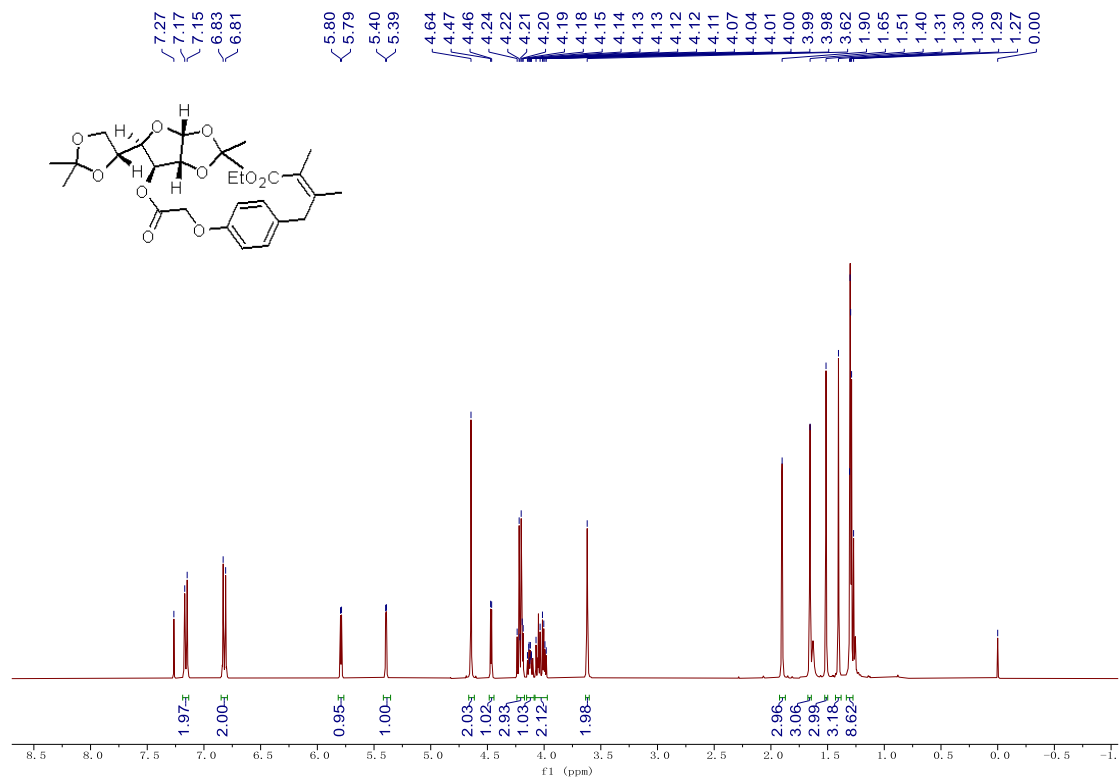

<sup>1</sup>H NMR spectrum for compound **4g**

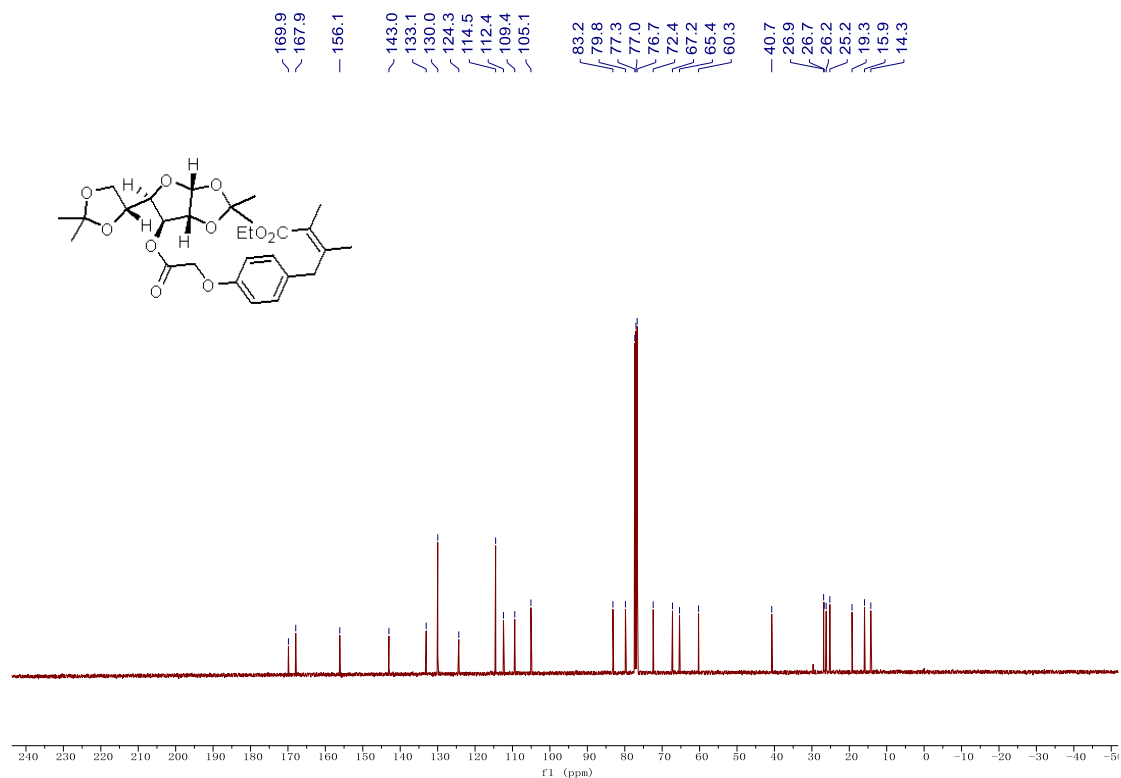

<sup>13</sup>C NMR spectrum for compound **4g**

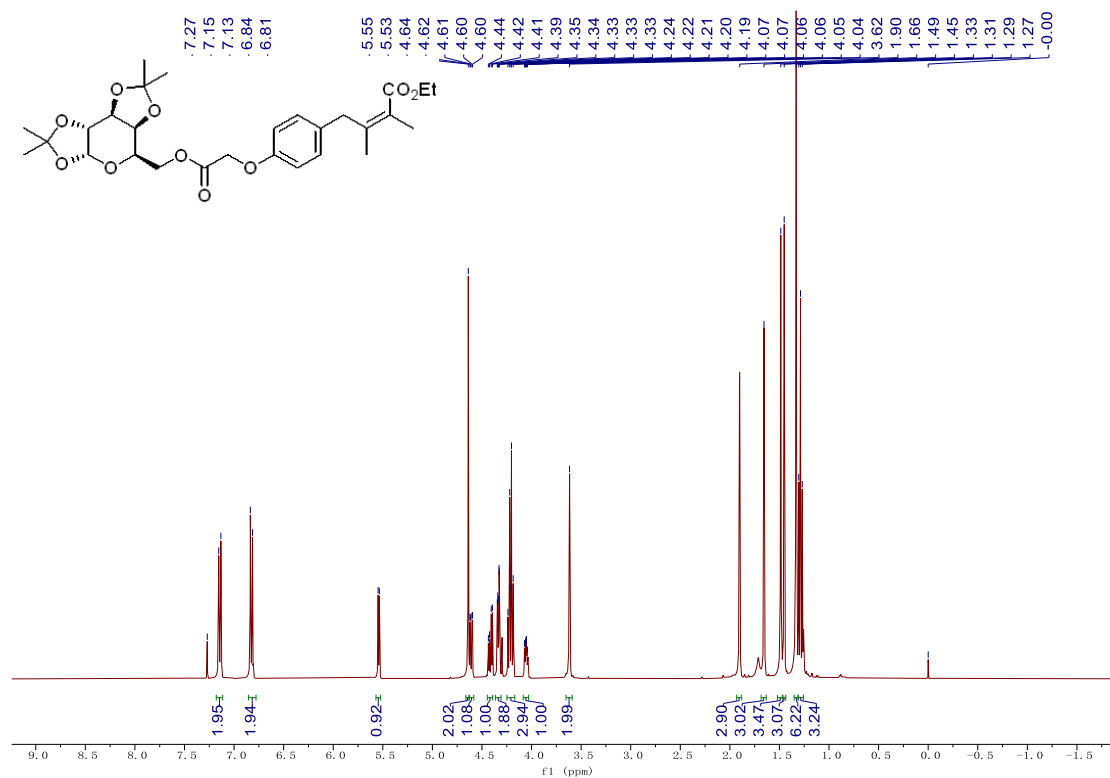

<sup>1</sup>H NMR spectrum for compound 4h

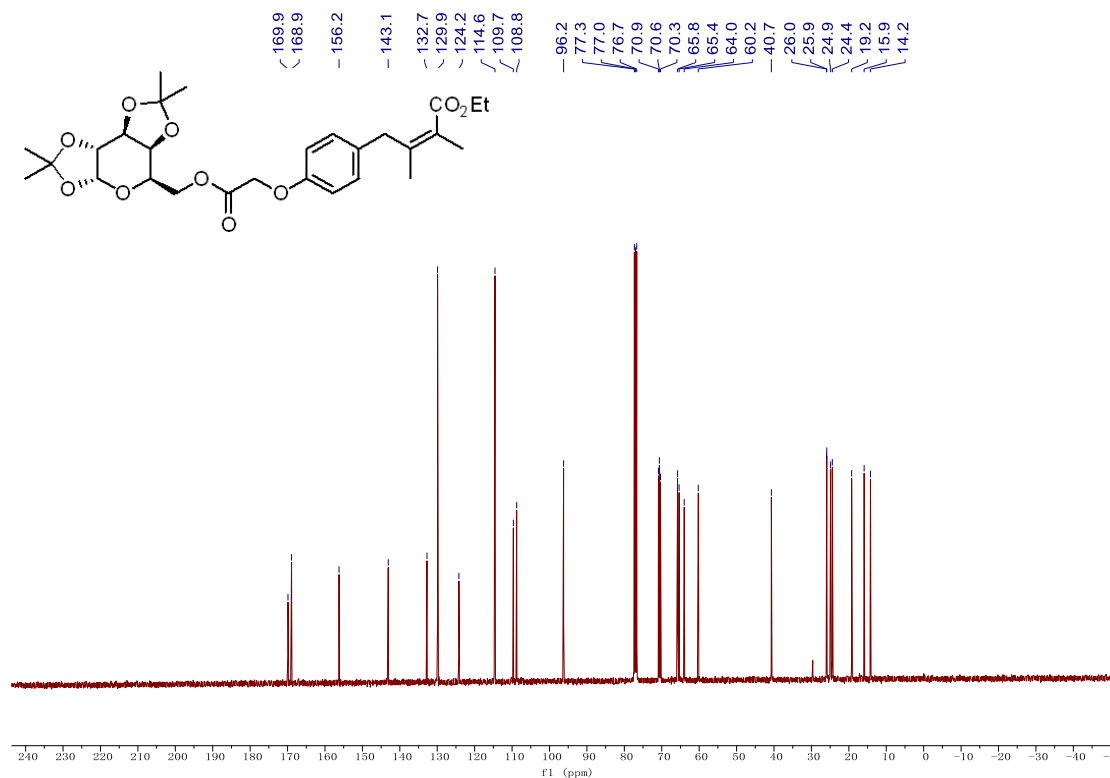

<sup>13</sup>C NMR spectrum for compound 4h

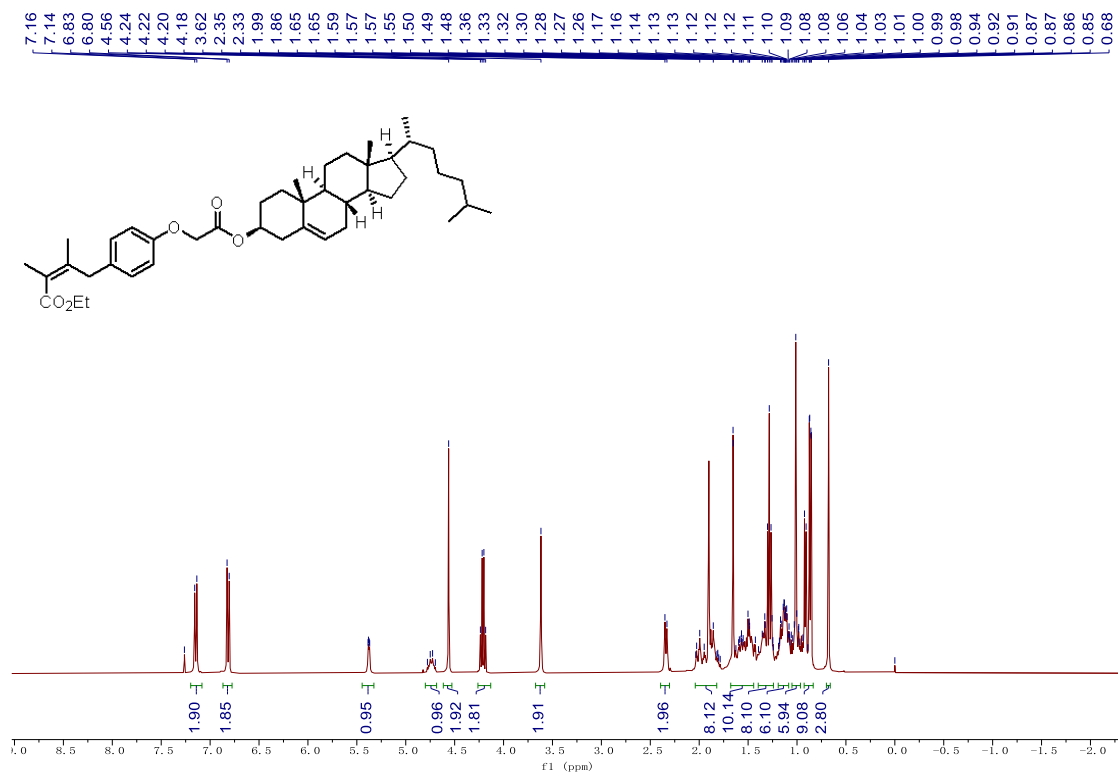

<sup>1</sup>H NMR spectrum for compound 4i

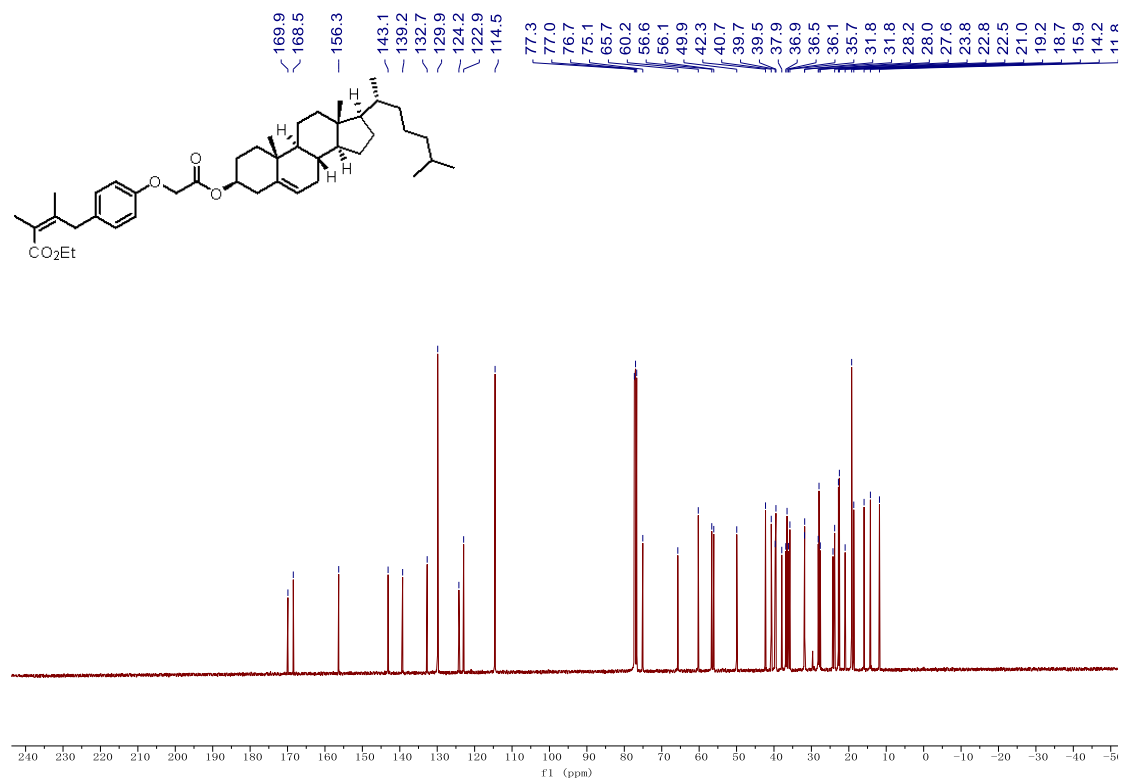

<sup>13</sup>C NMR spectrum for compound 4i

lyt1478a-1.1.fid

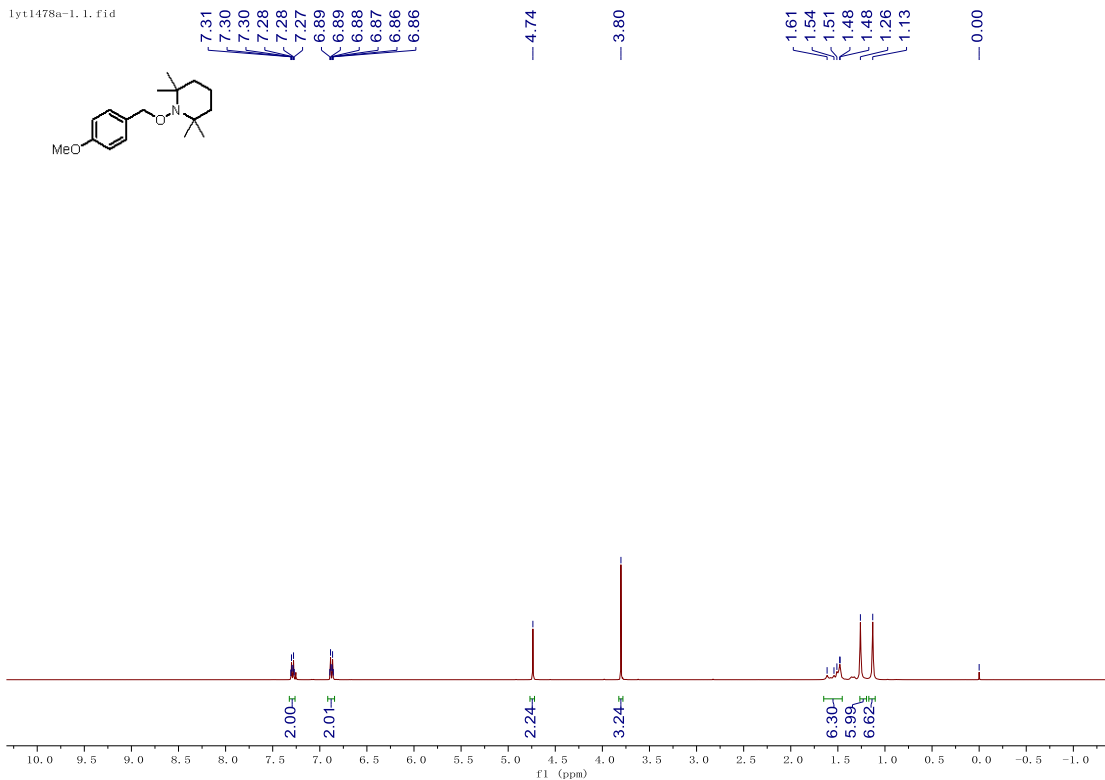

<sup>1</sup>H NMR spectrum for compound **8**

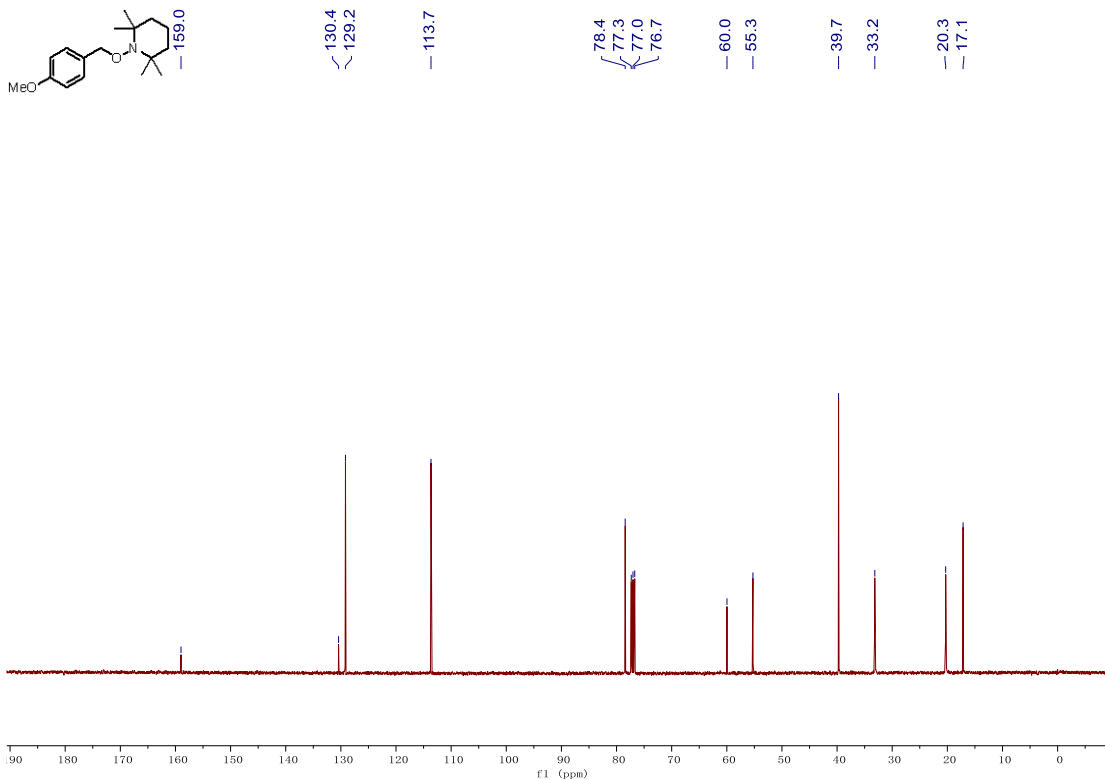

<sup>13</sup>C NMR spectrum for compound **8**



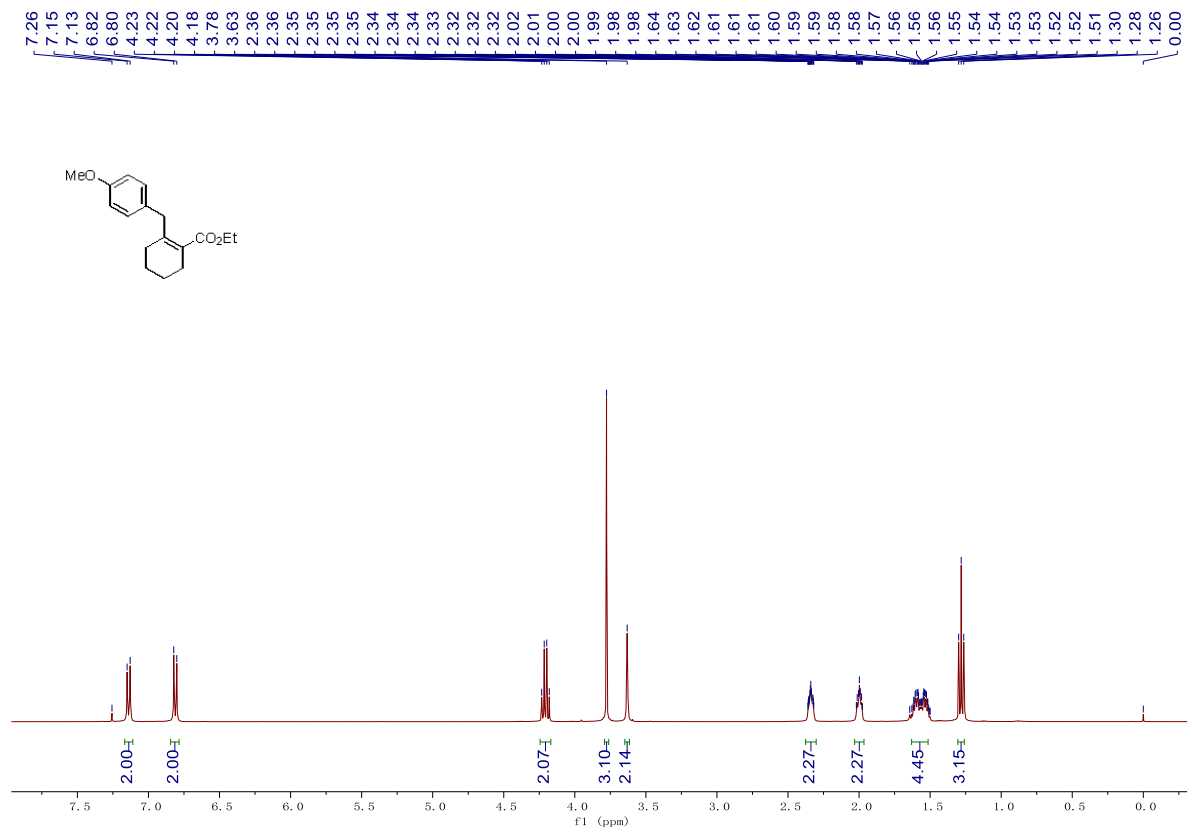

<sup>1</sup>H NMR spectrum for compound **10**

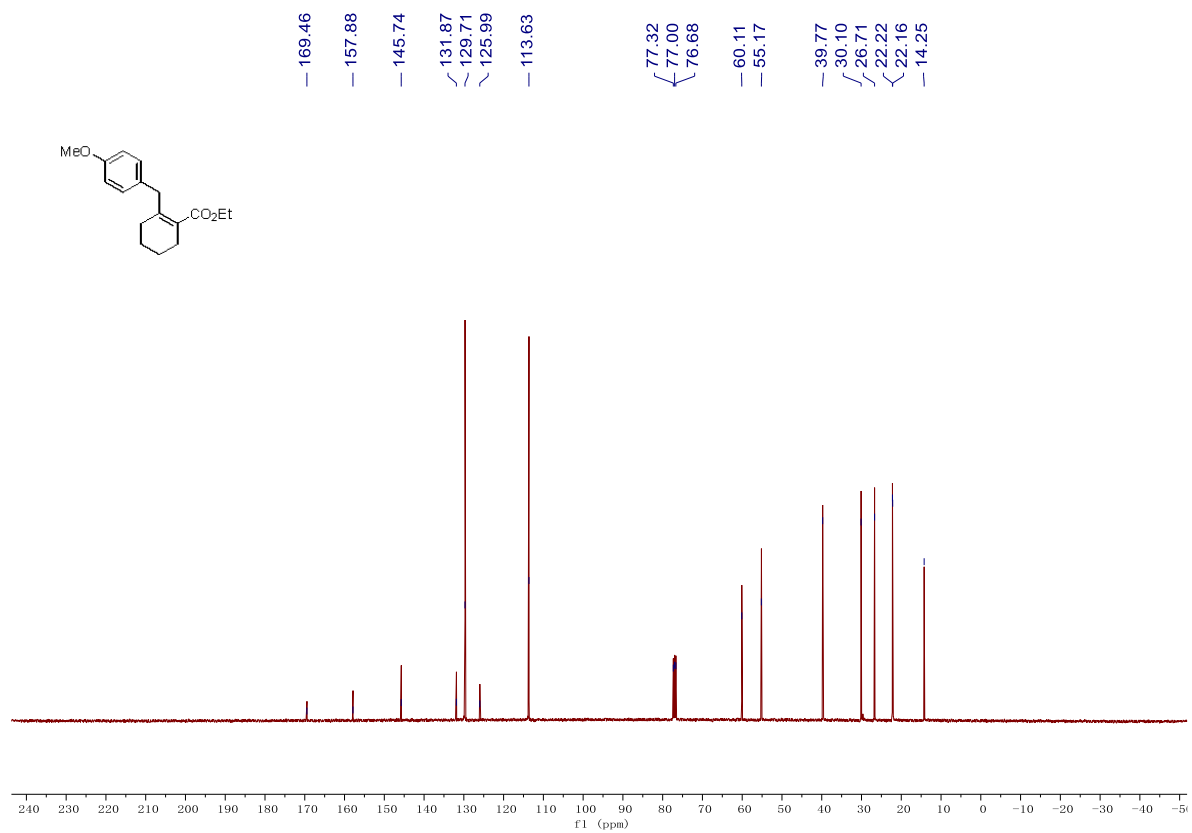

<sup>13</sup>C NMR spectrum for compound **10**

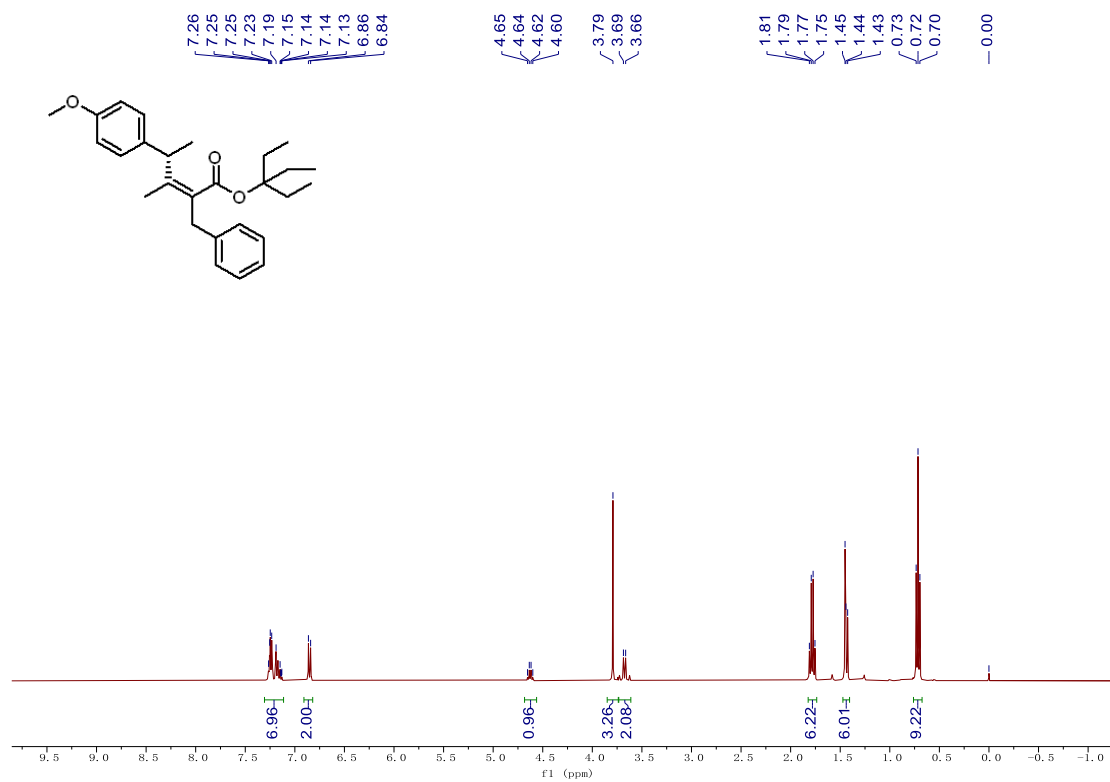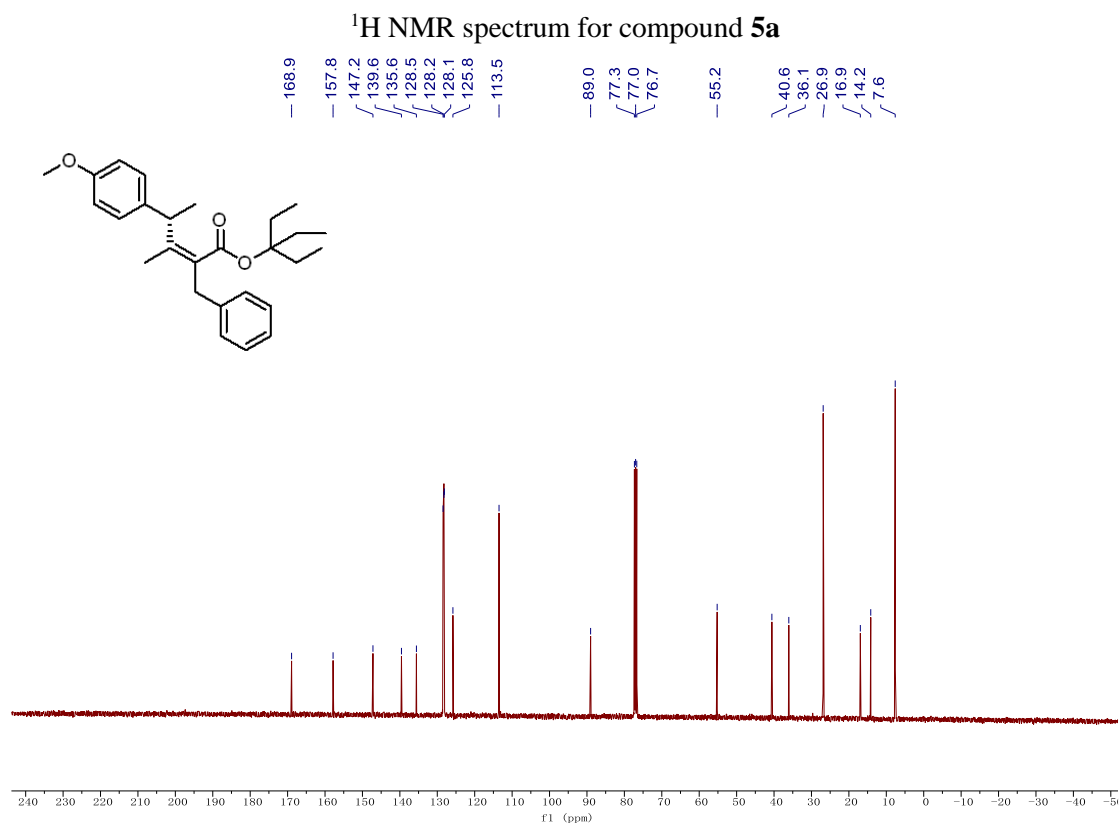

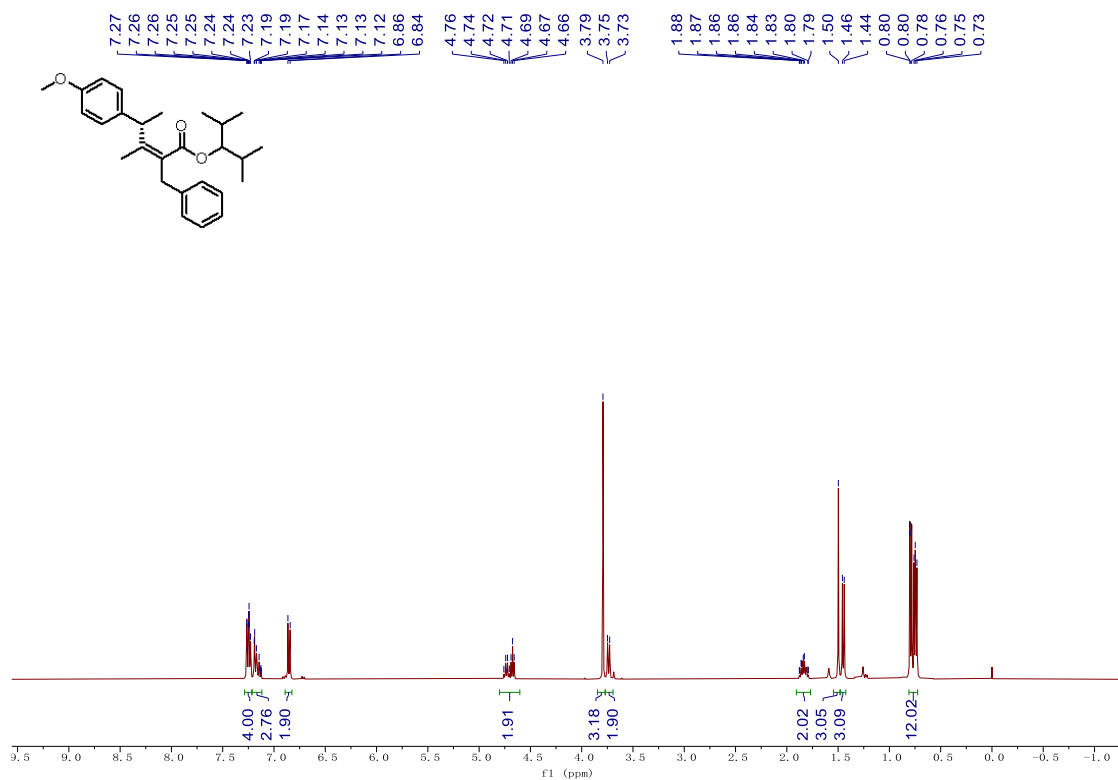

**<sup>1</sup>H NMR spectrum for compound 5b**

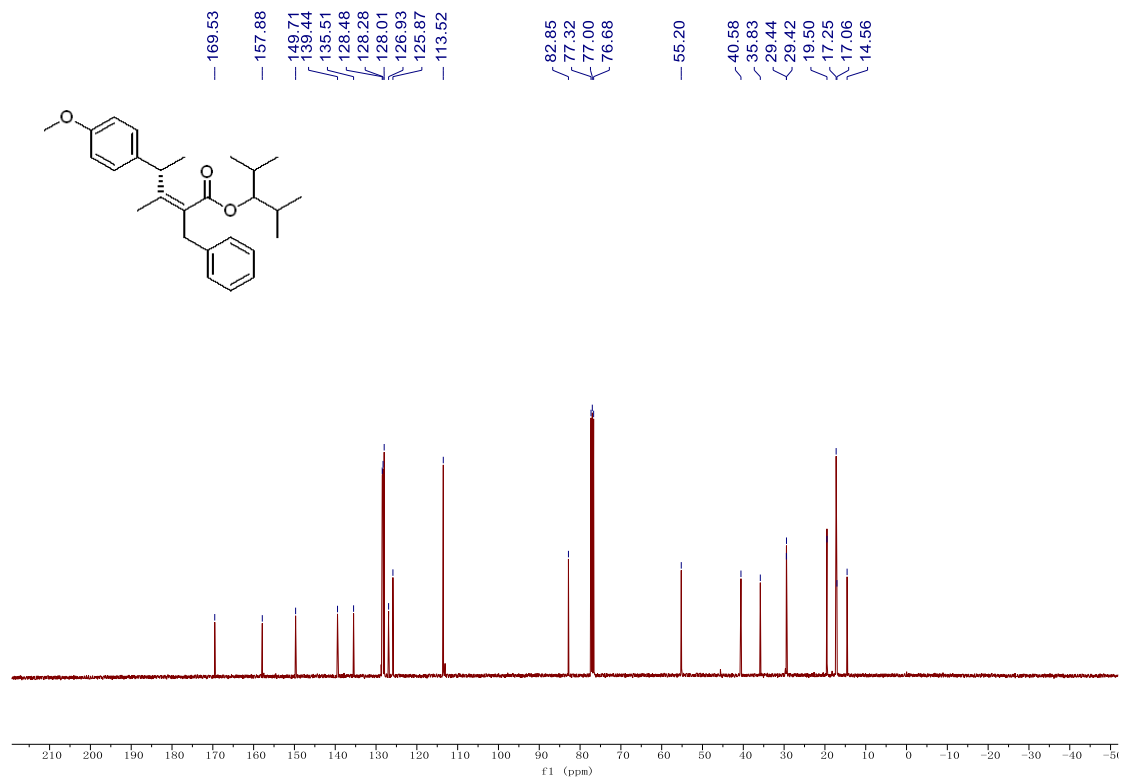

**<sup>13</sup>C NMR spectrum for compound 5b**

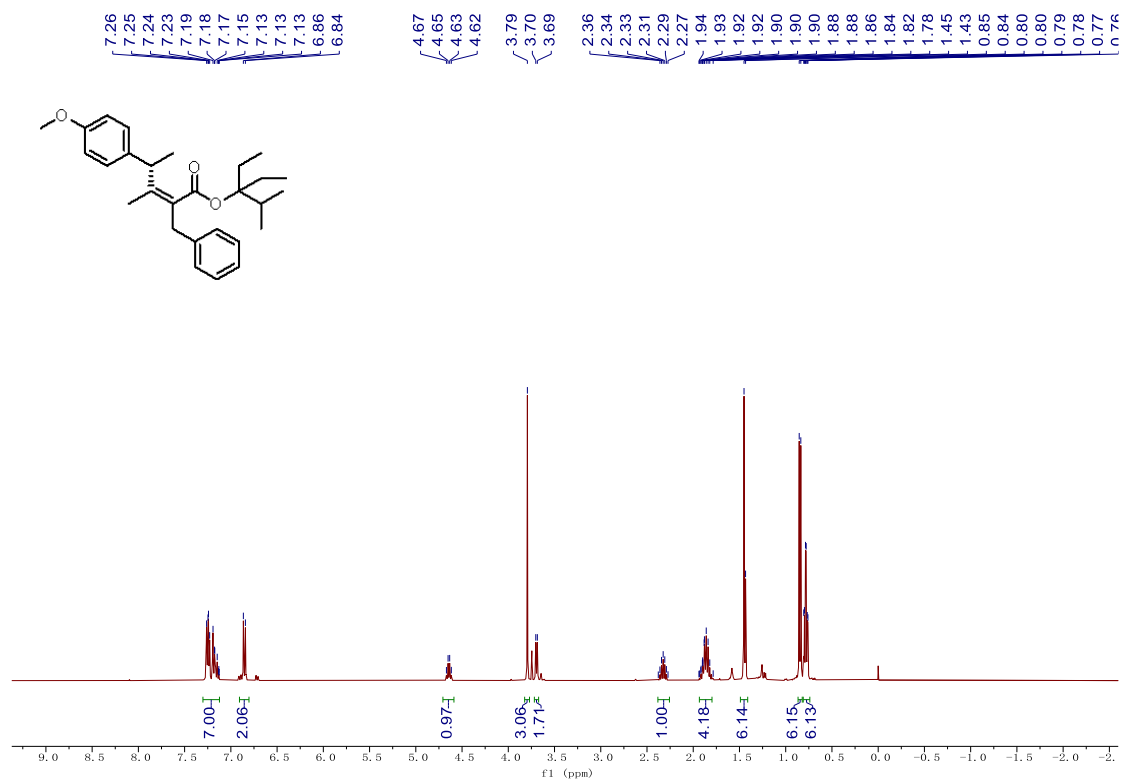

<sup>1</sup>H NMR spectrum for compound **5c**

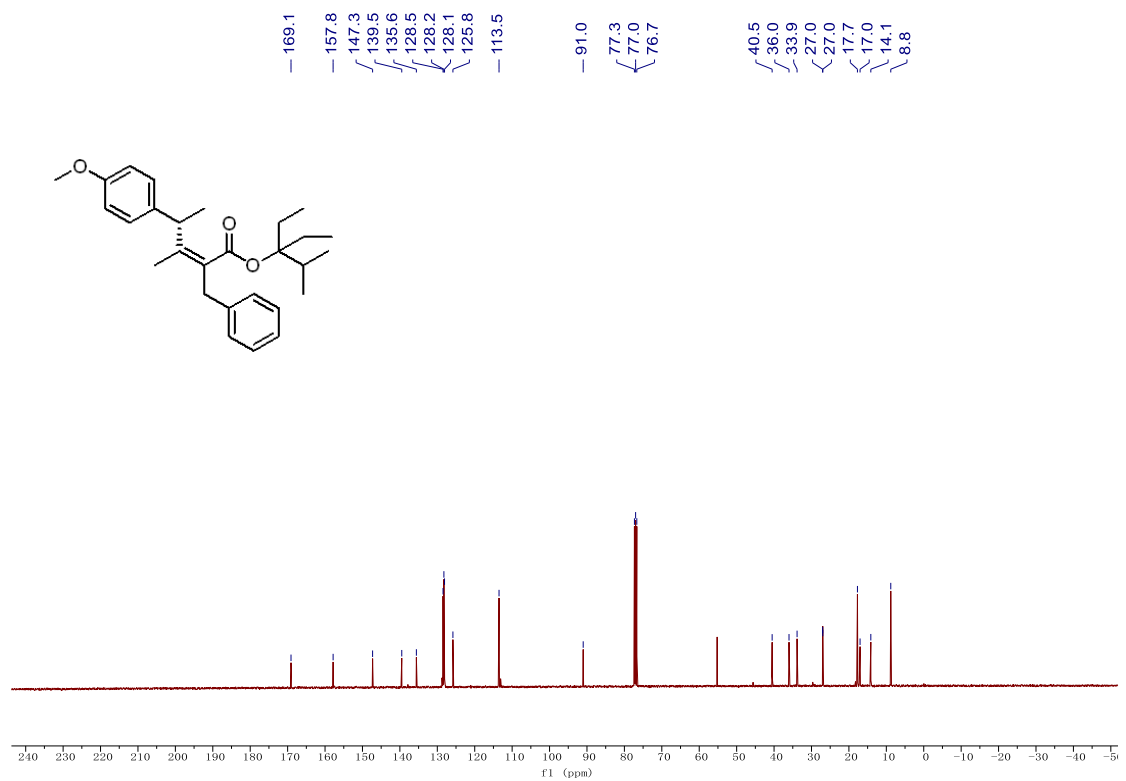

<sup>13</sup>C NMR spectrum for compound **5c**

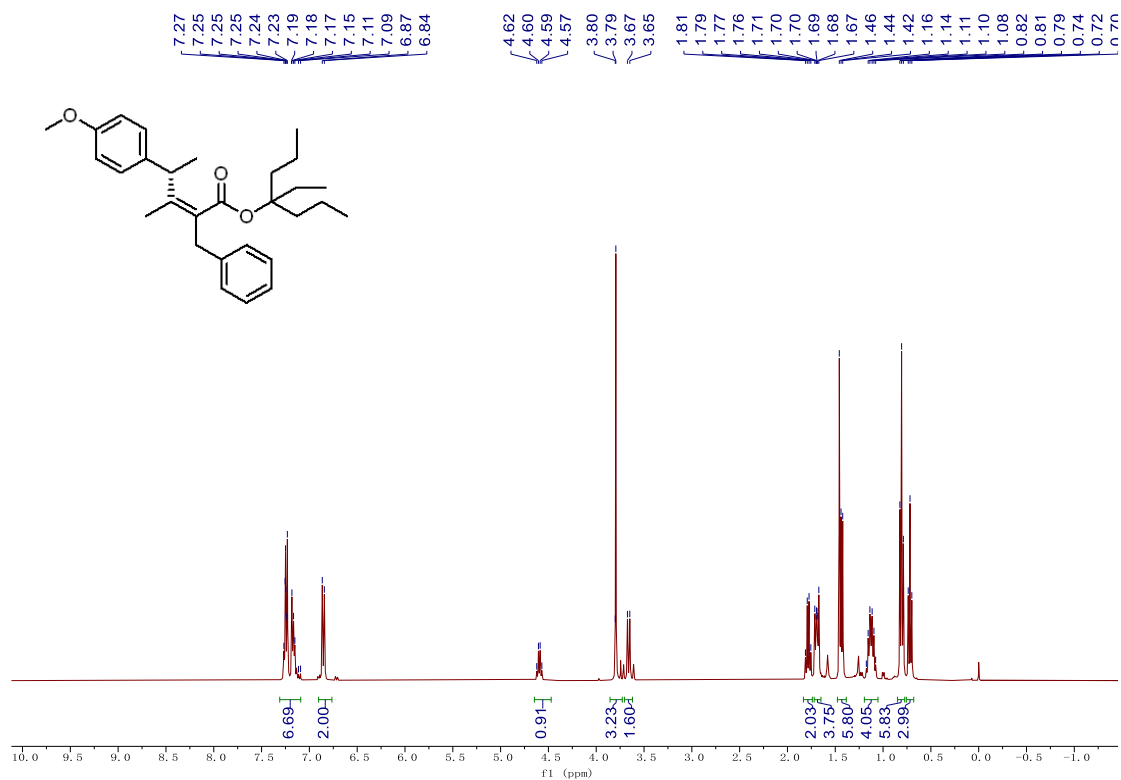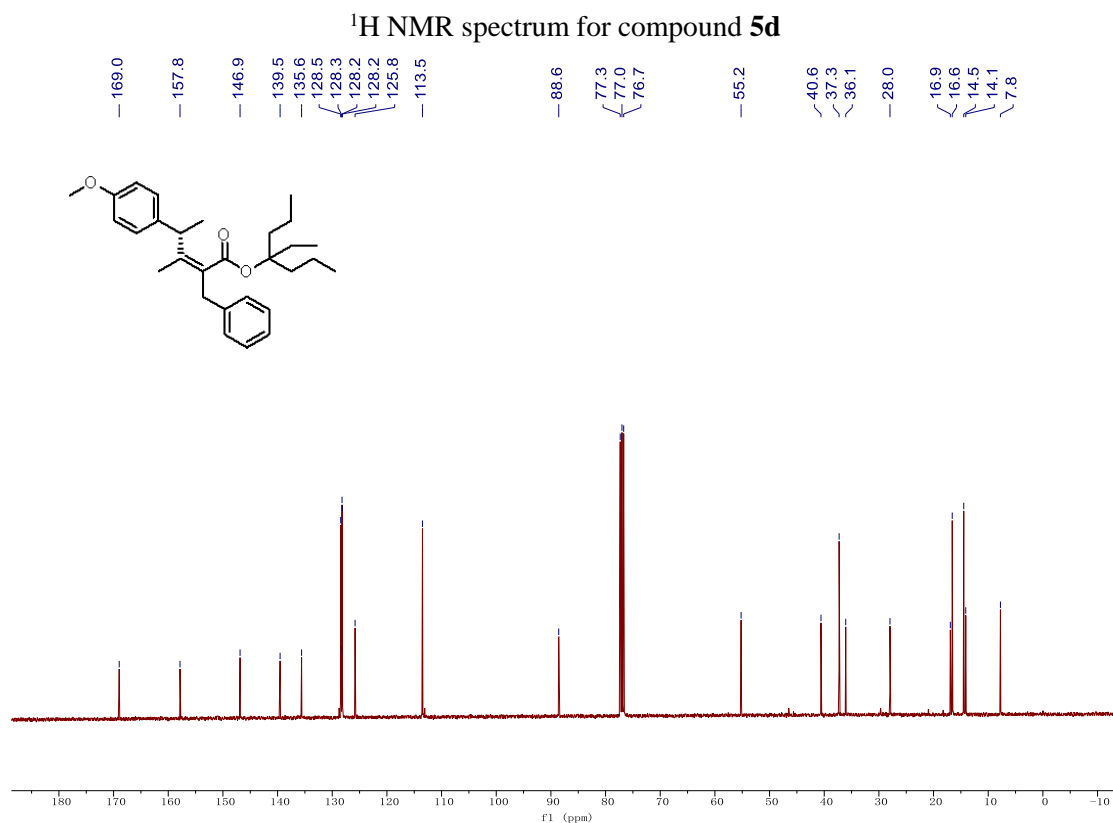

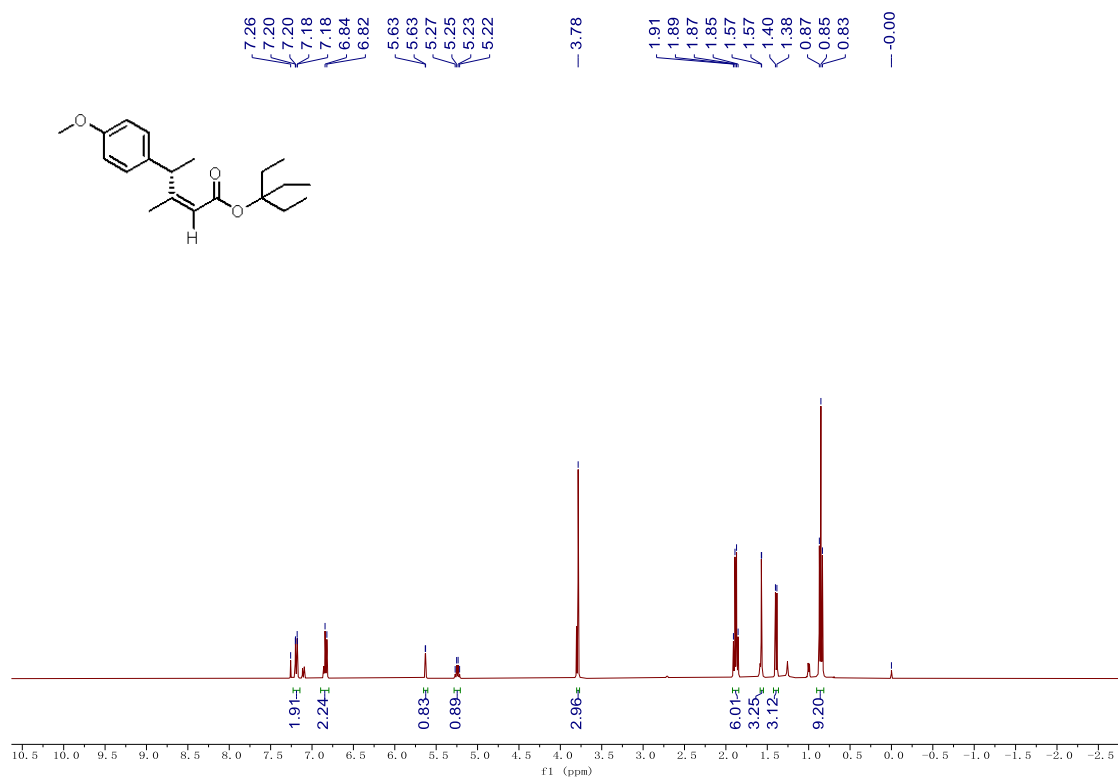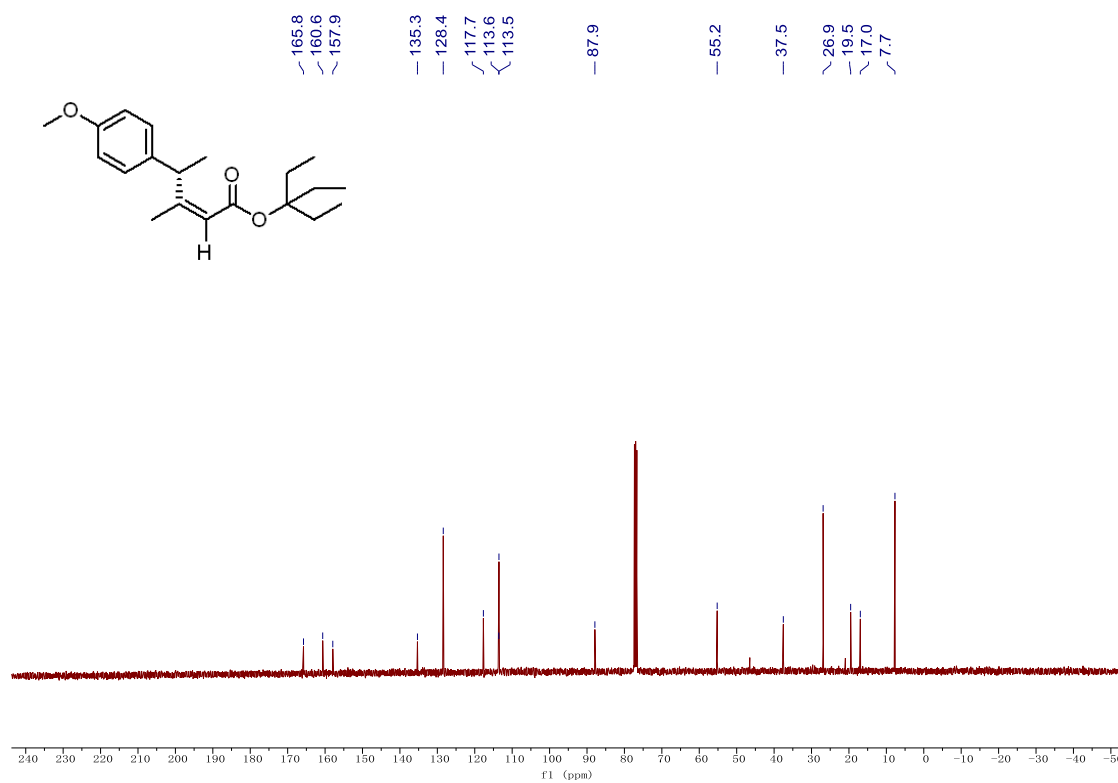

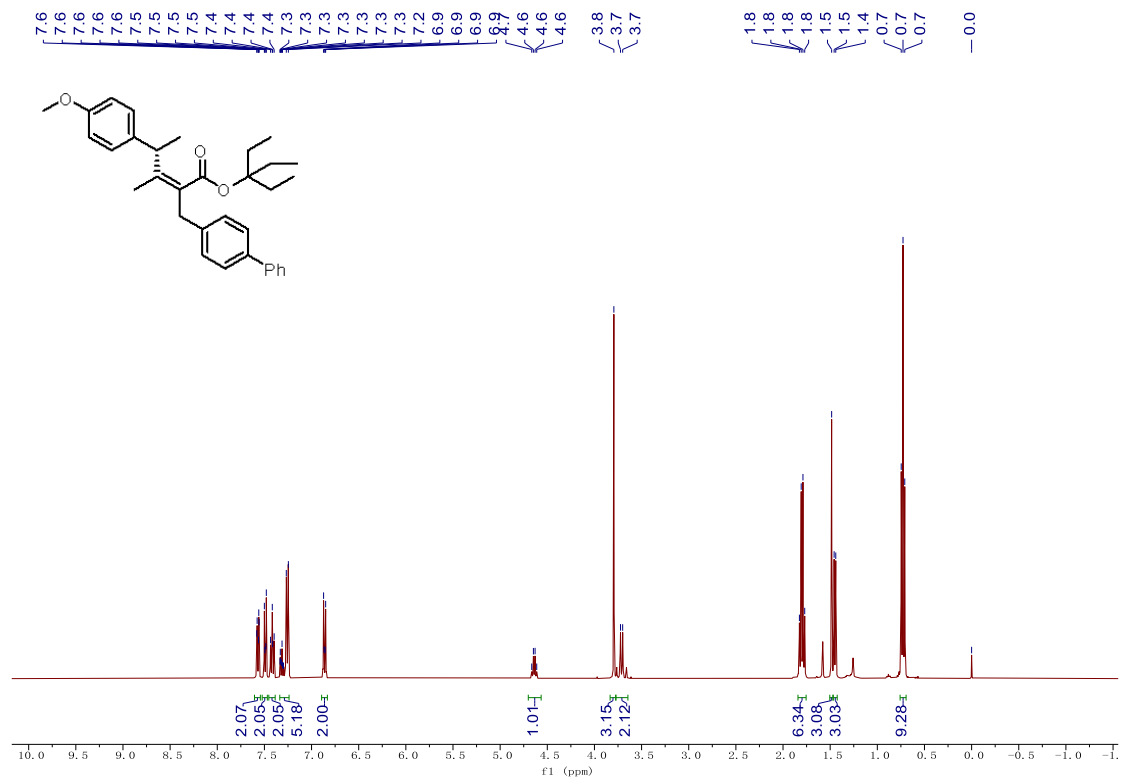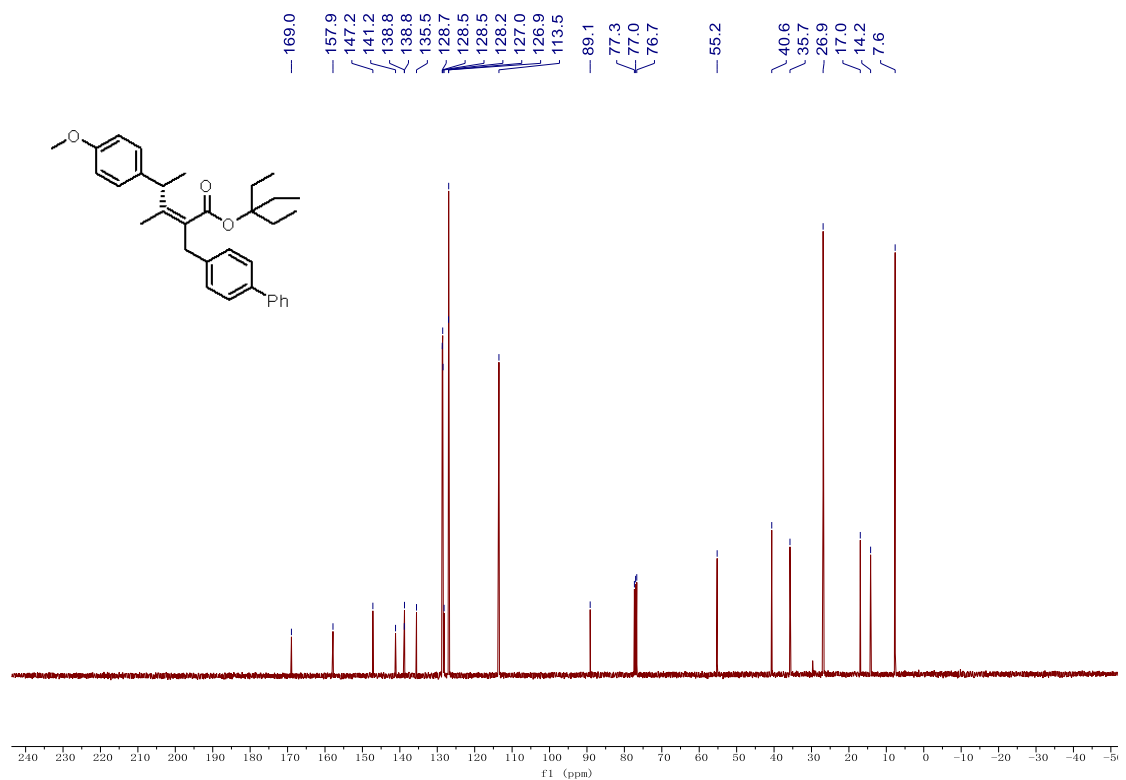

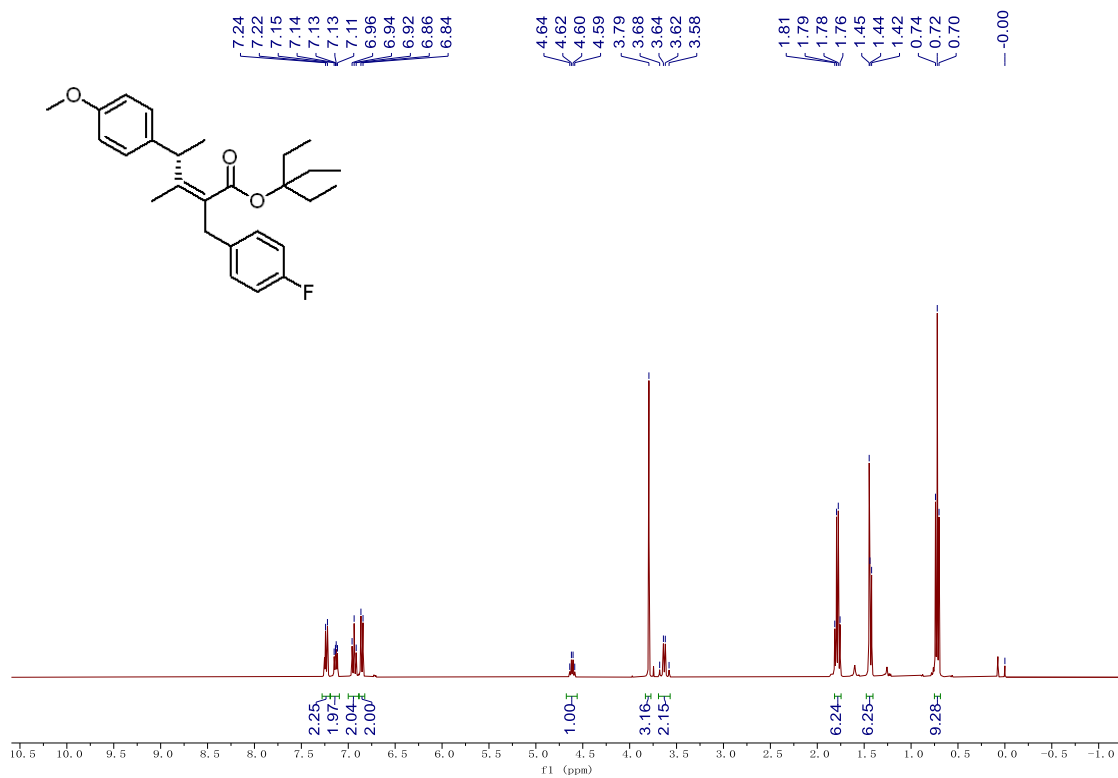

**<sup>1</sup>H NMR spectrum for compound 5g**

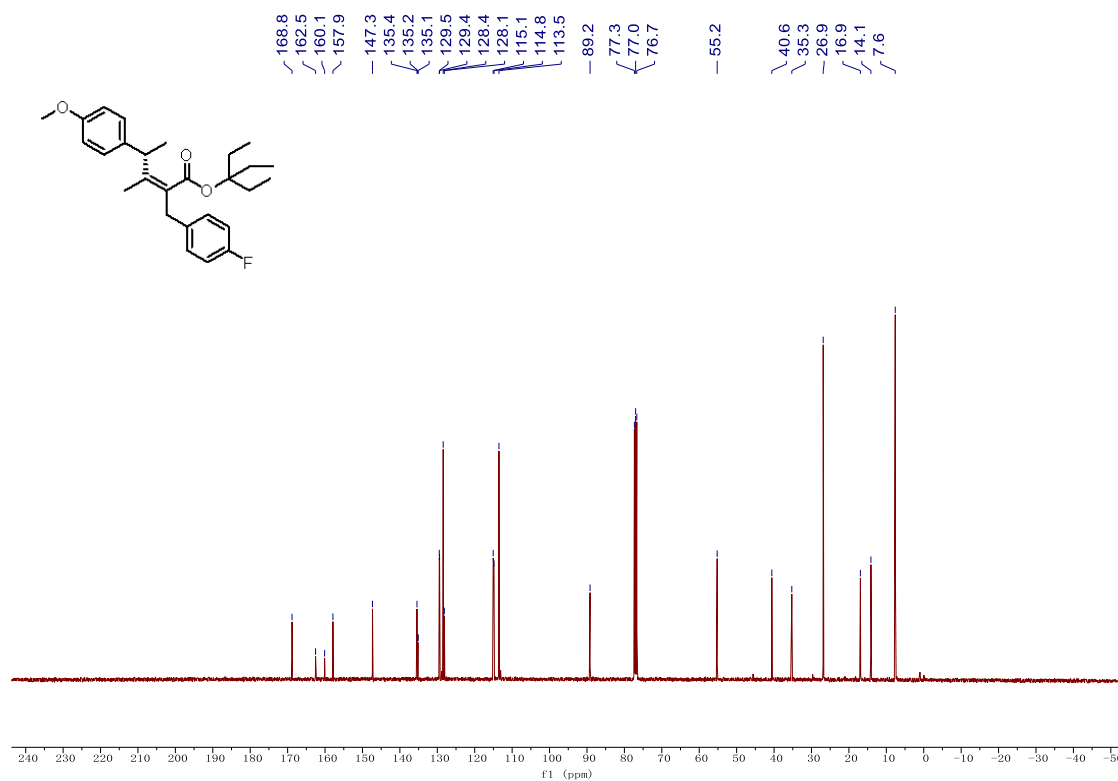

**<sup>13</sup>C NMR spectrum for compound 5g**



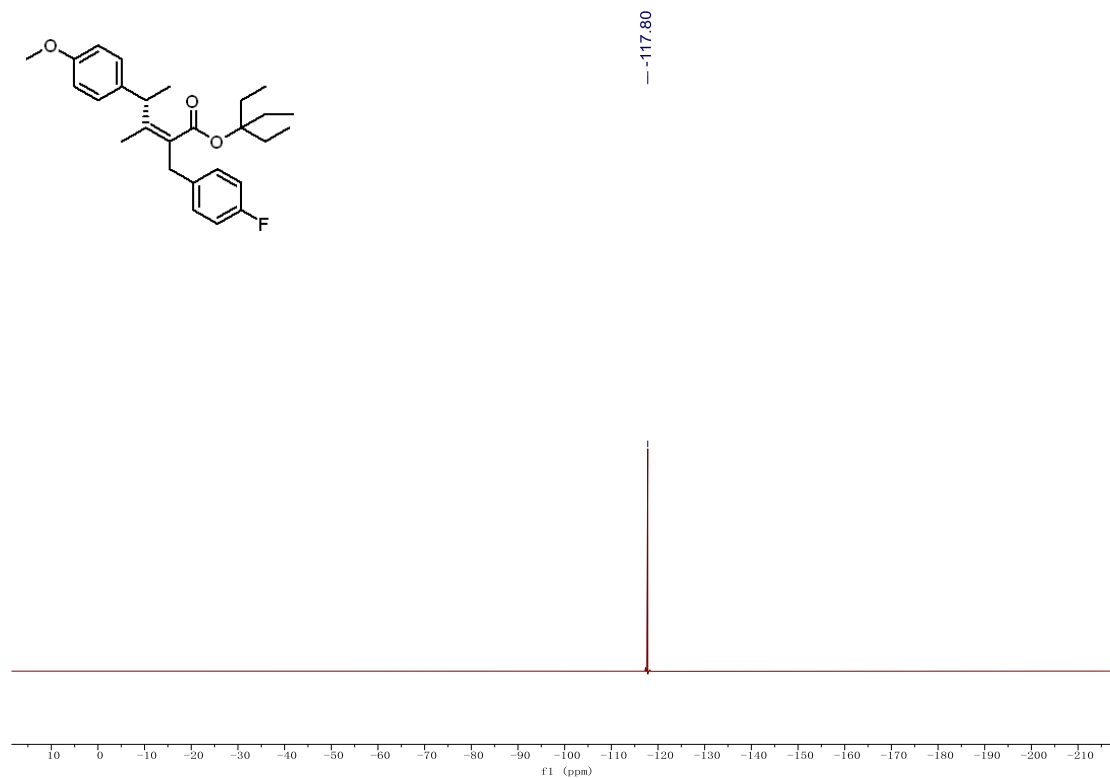

$^{19}\text{F}$  NMR spectrum for compound **5g**

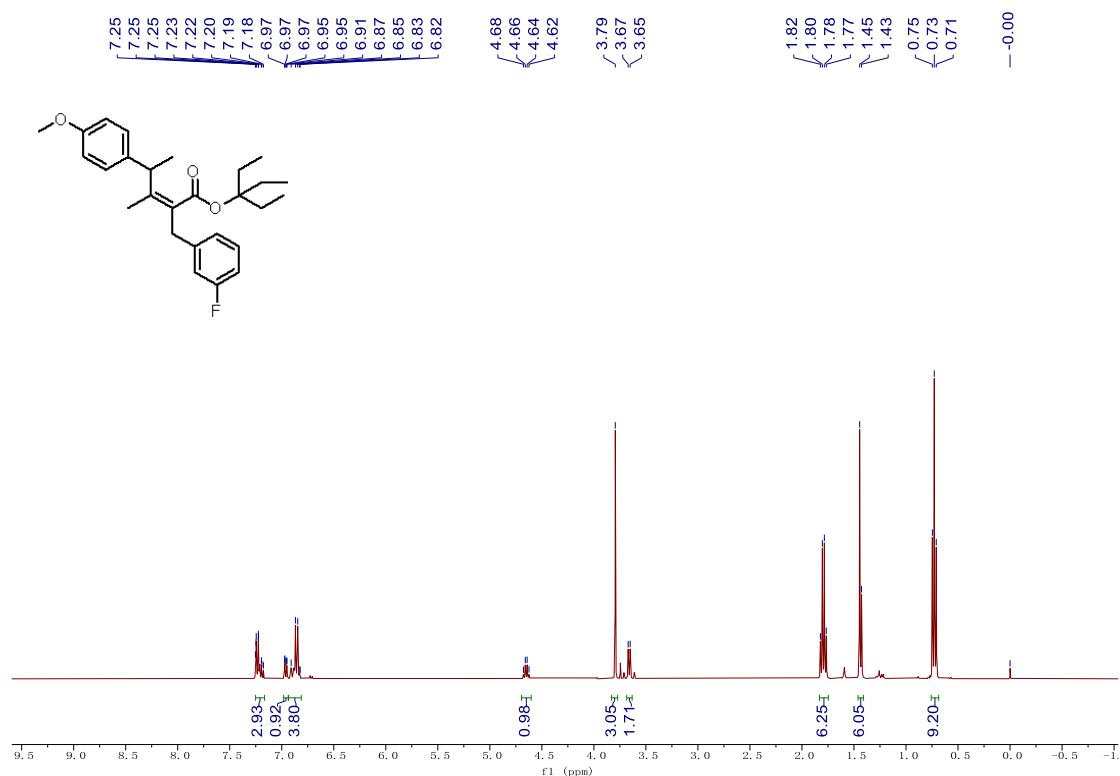

$^1\text{H}$  NMR spectrum for compound **5h**

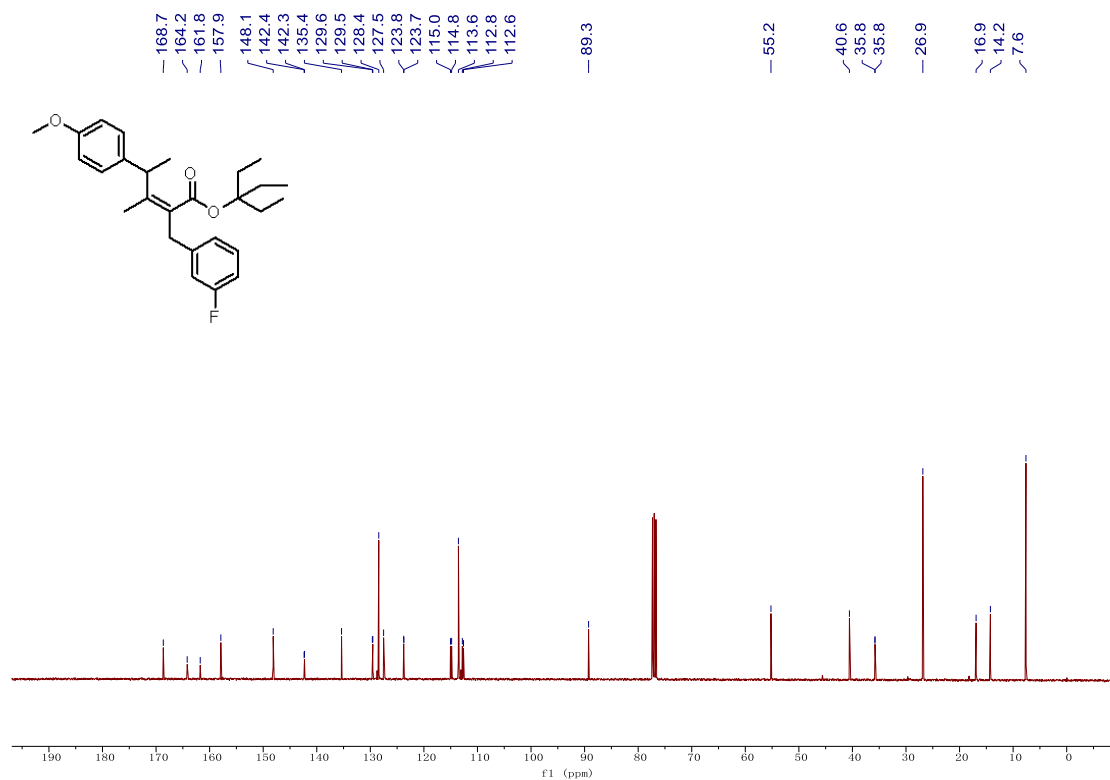

$^{13}\text{C}$  NMR spectrum for compound **5h**

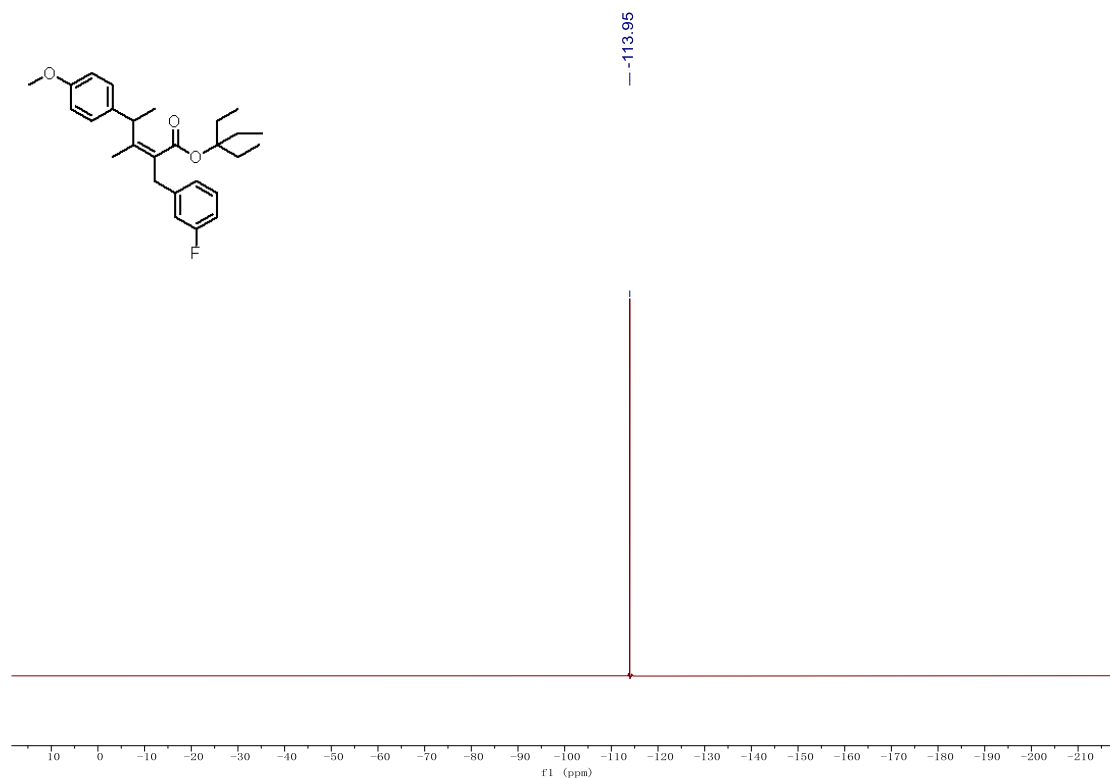

$^{19}\text{F}$  NMR spectrum for compound **5h**

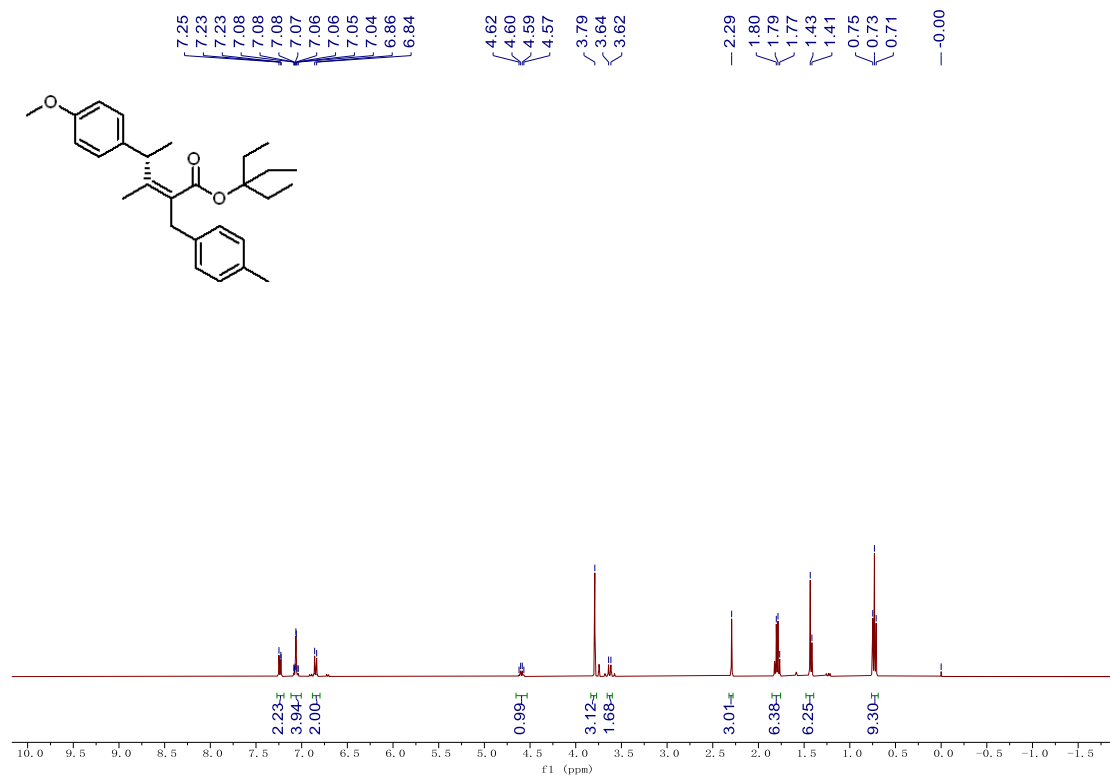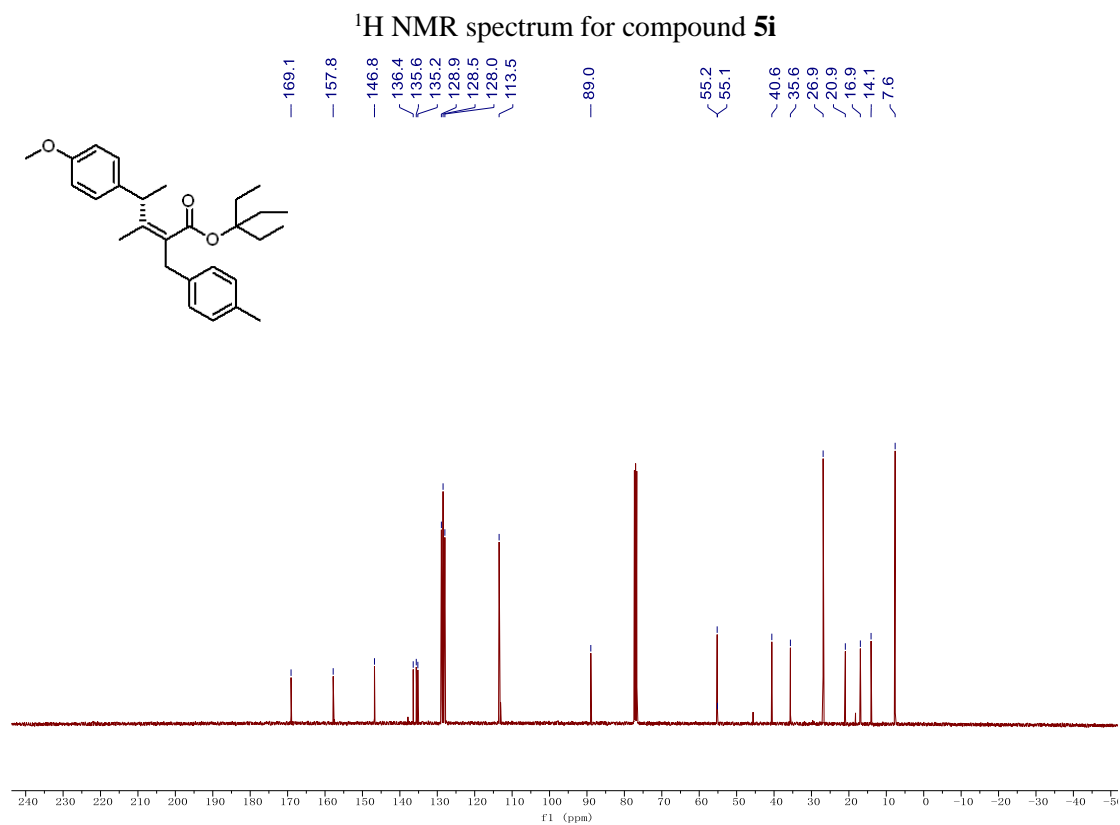

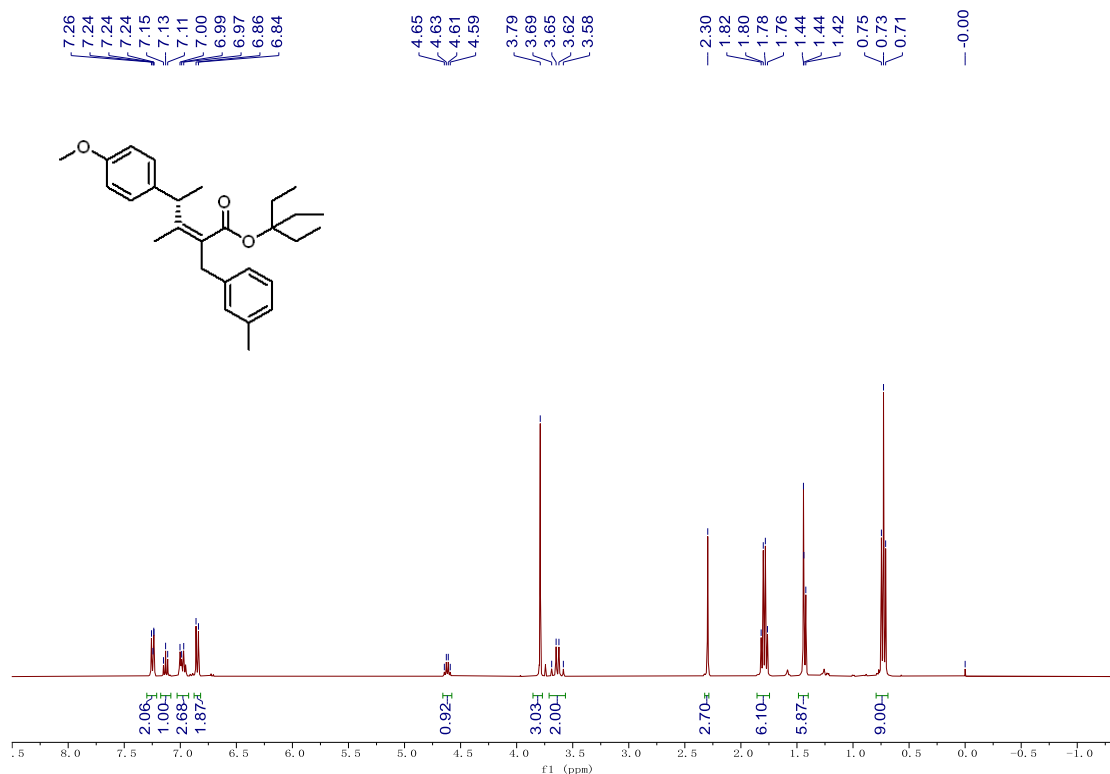

<sup>1</sup>H NMR spectrum for compound **5j**

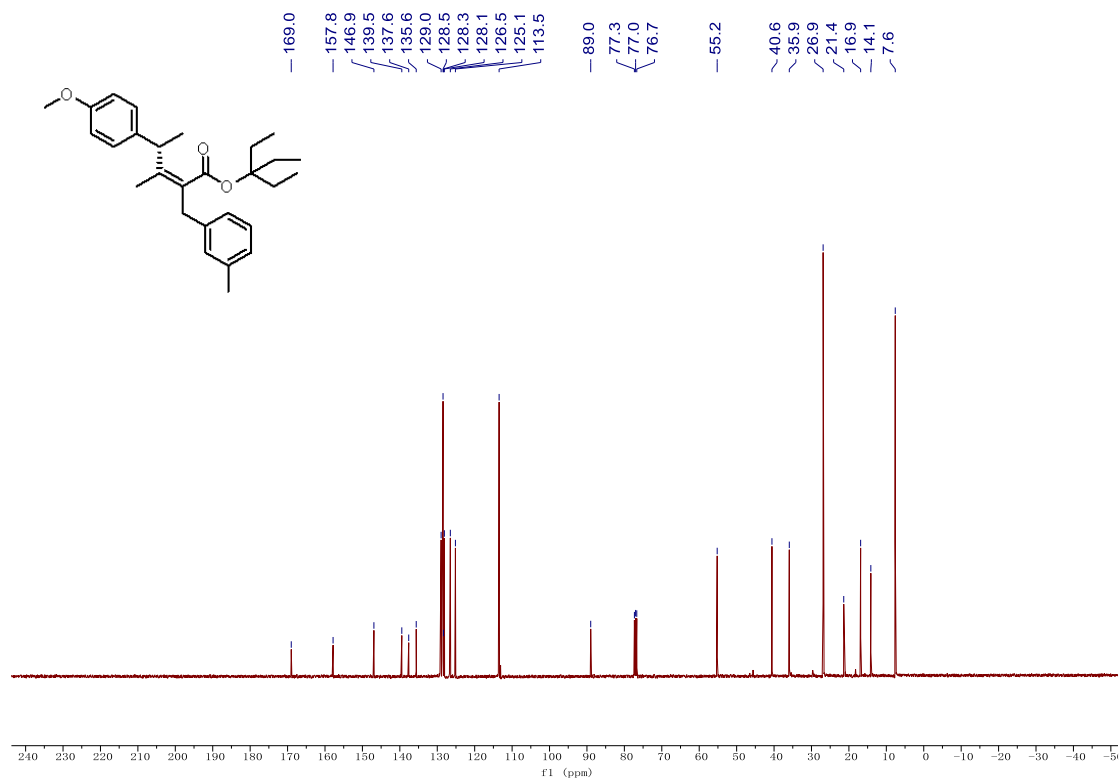

<sup>13</sup>C NMR spectrum for compound **5j**

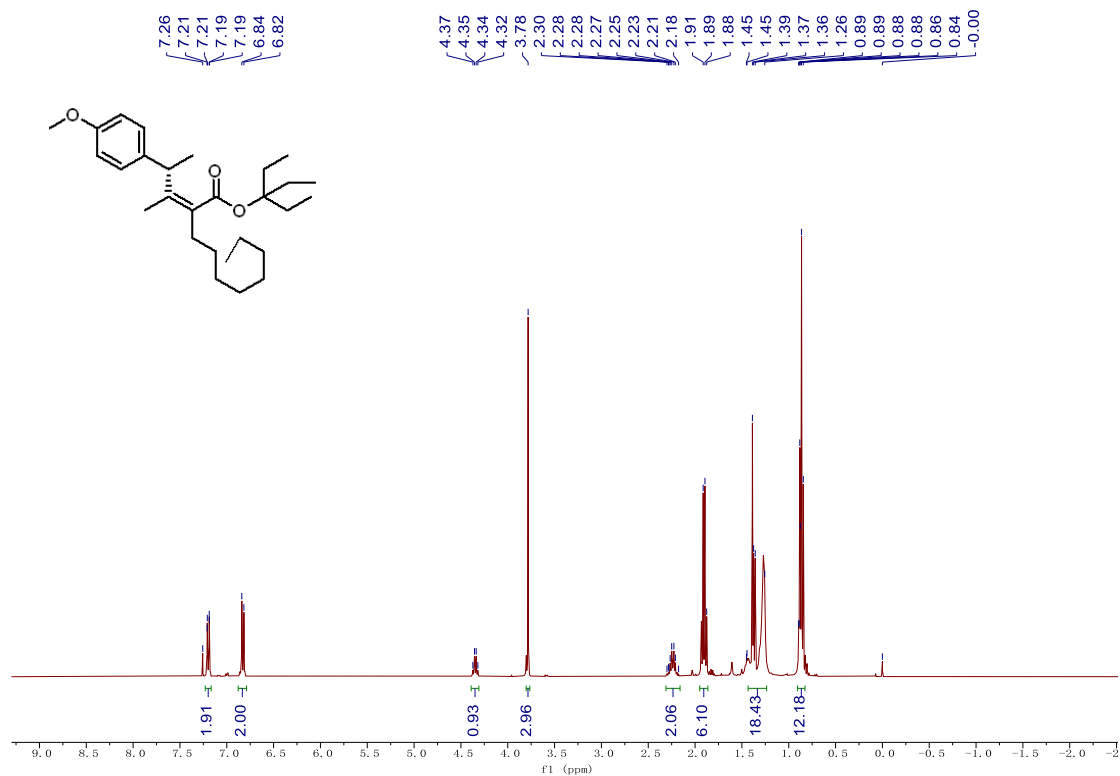

**<sup>1</sup>H NMR spectrum for compound 5k**

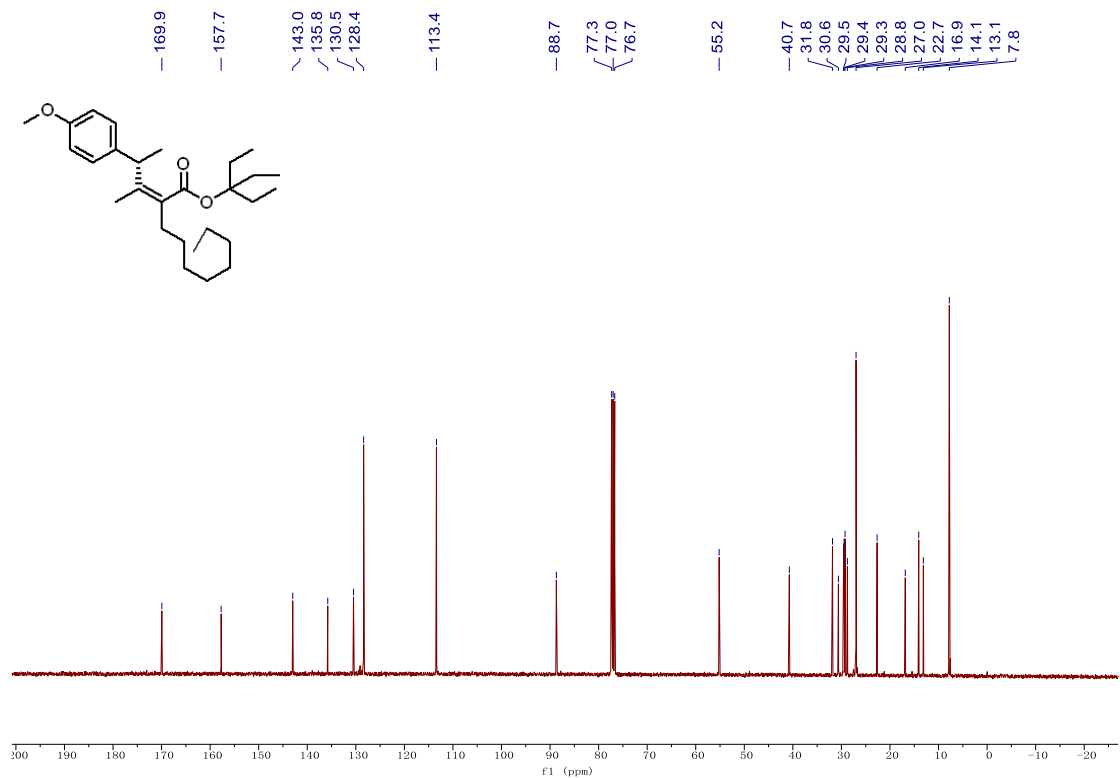

**<sup>13</sup>C NMR spectrum for compound 5k**

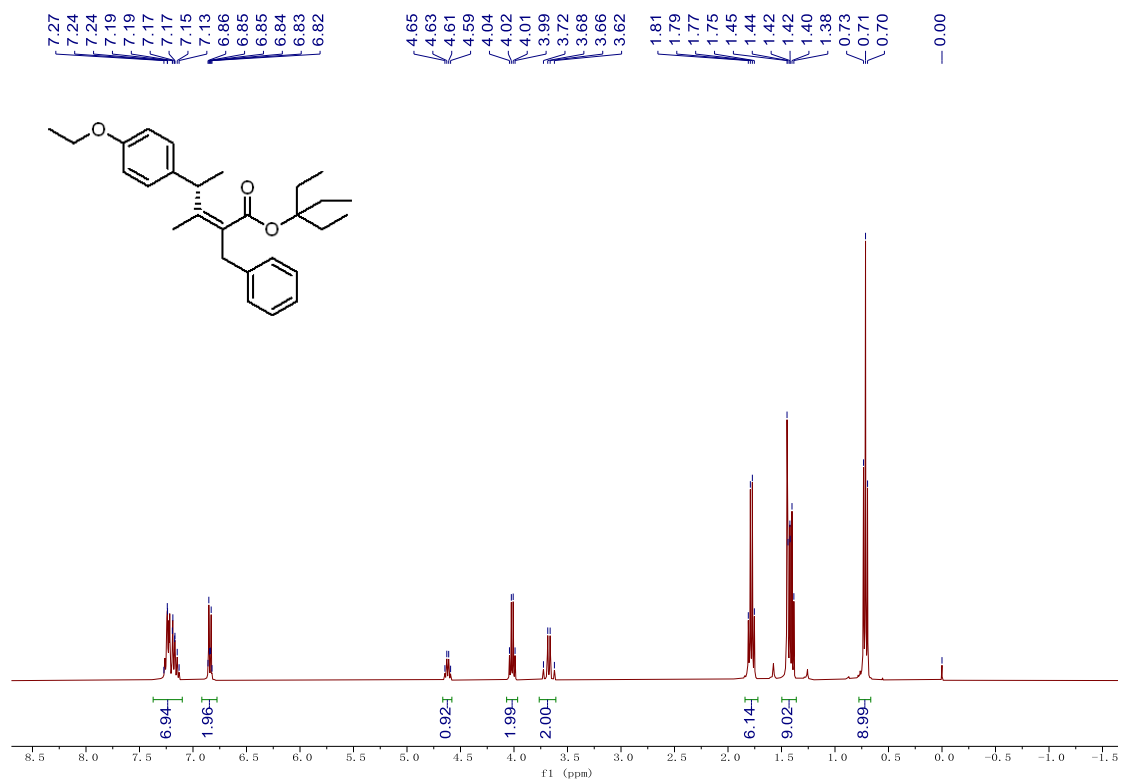

**<sup>1</sup>H NMR spectrum for compound 5I**

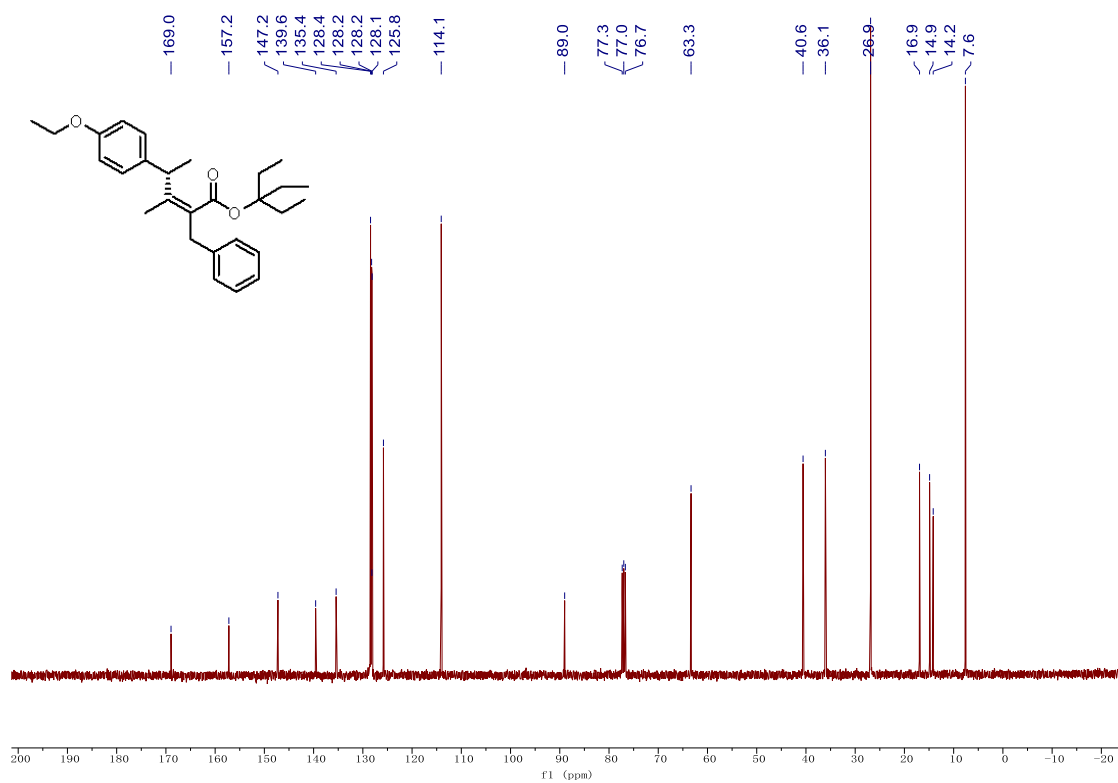

**<sup>13</sup>C NMR spectrum for compound 5I**

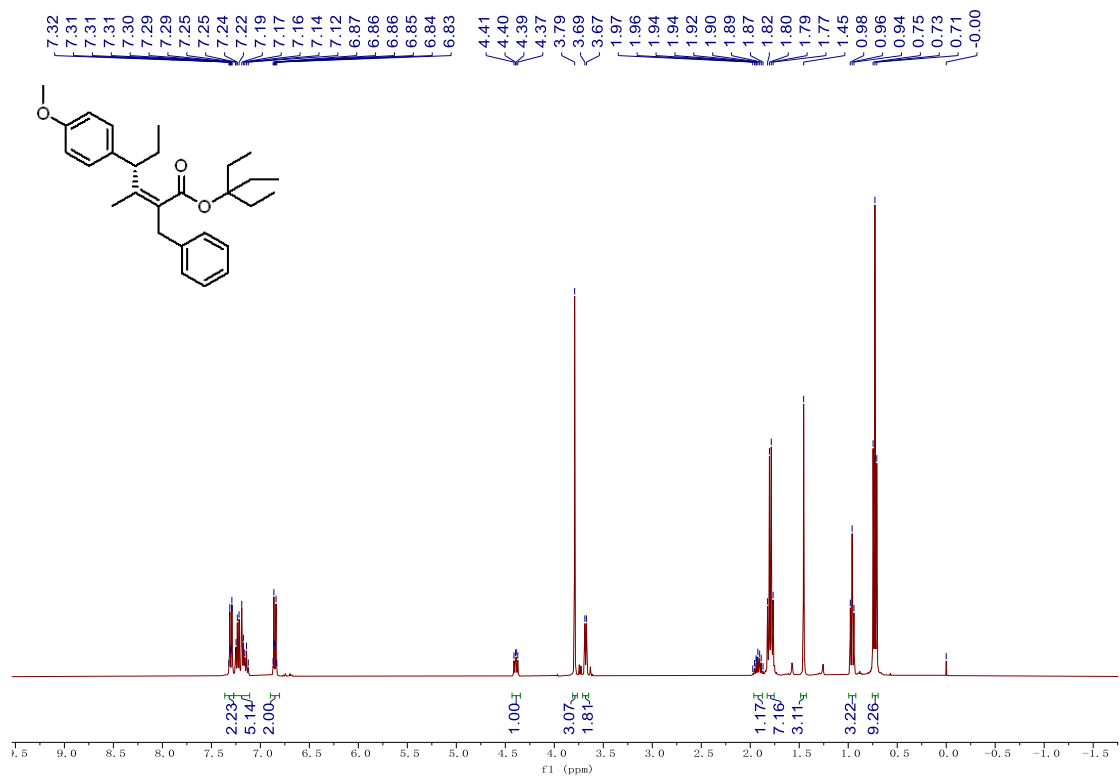

<sup>1</sup>H NMR spectrum for compound **5m**

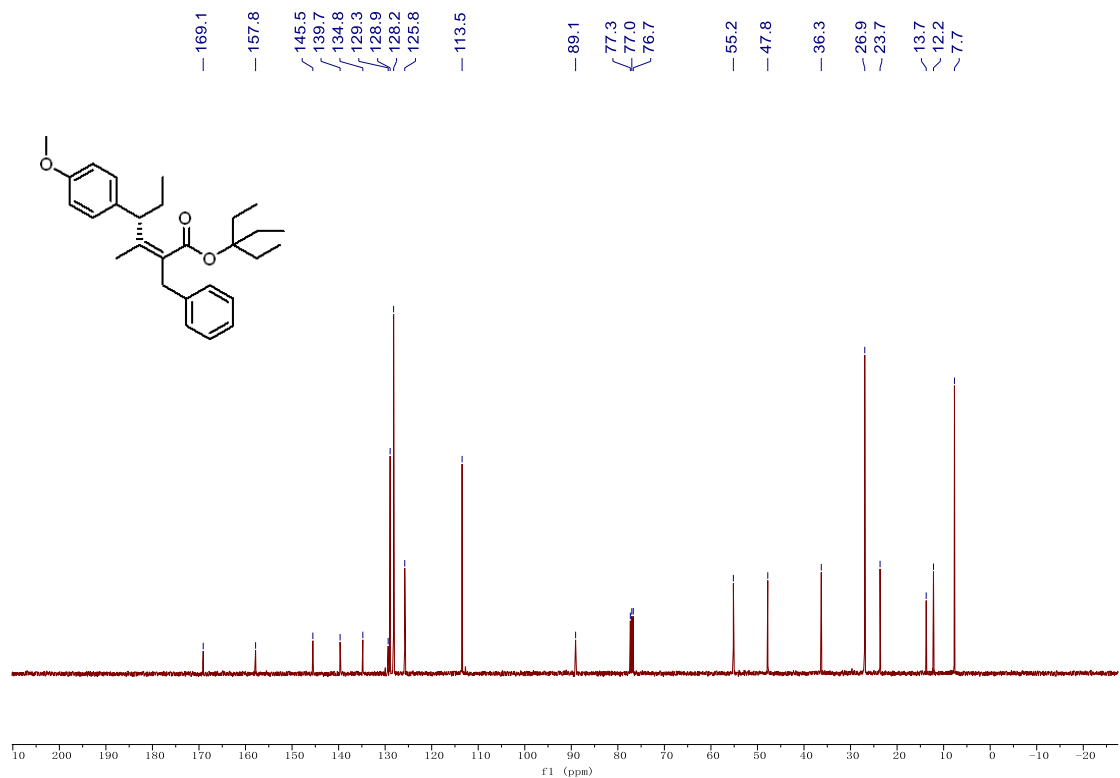

<sup>13</sup>C NMR spectrum for compound **5m**

## 8. HPLC analysis.

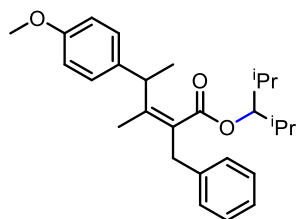

HPLC using two AD-H columns (hexane: i-PrOH=98.5:1.5, 0.5 mL/min)

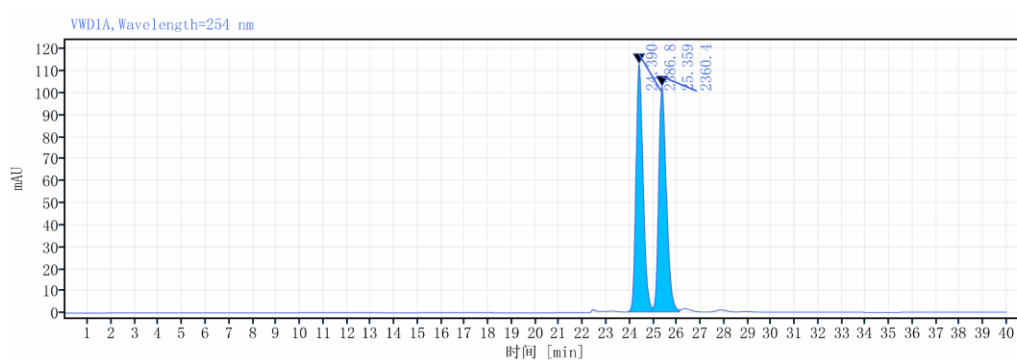

信号: VWD1A, Wavelength=254 nm

| 保留时间 [min] | 类型 | 峰宽 [min] | 峰面积     | 峰高     | 峰面积%  | 名称 |
|------------|----|----------|---------|--------|-------|----|
| 24.390     | BV | 1.17     | 2386.75 | 112.69 | 50.28 |    |
| 25.359     | VV | 1.15     | 2360.38 | 102.51 | 49.72 |    |
| 总和         |    |          | 4747.13 |        |       |    |

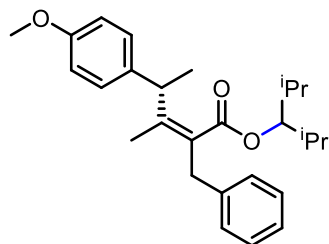



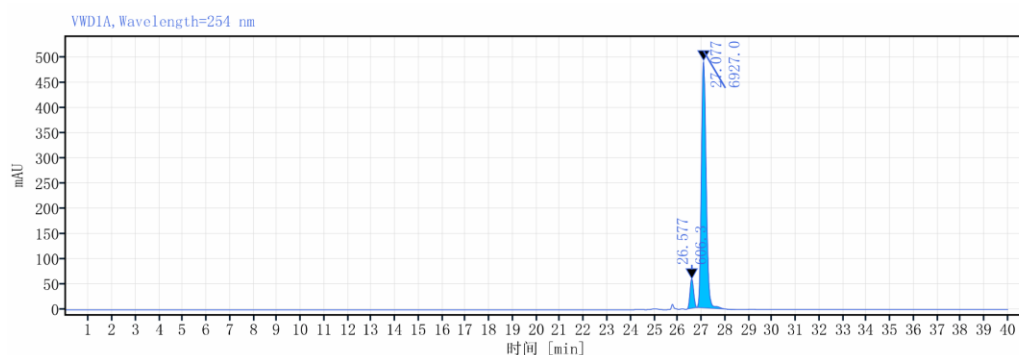

信号: VWD1A, Wavelength=254 nm

| 保留时间 [min] | 类型   | 峰宽 [min] | 峰面积     | 峰高     | 峰面积%  | 名称 |
|------------|------|----------|---------|--------|-------|----|
| 26.577     | MM m | 0.40     | 606.27  | 57.45  | 8.05  |    |
| 27.077     | MM m | 1.64     | 6927.01 | 488.16 | 91.95 |    |
| 总和         |      |          | 7533.28 |        |       |    |

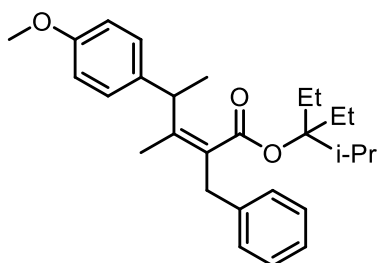

HPLC using two AD-H columns (hexane: i-PrOH=98.5:1.5, 0.5 mL/min)

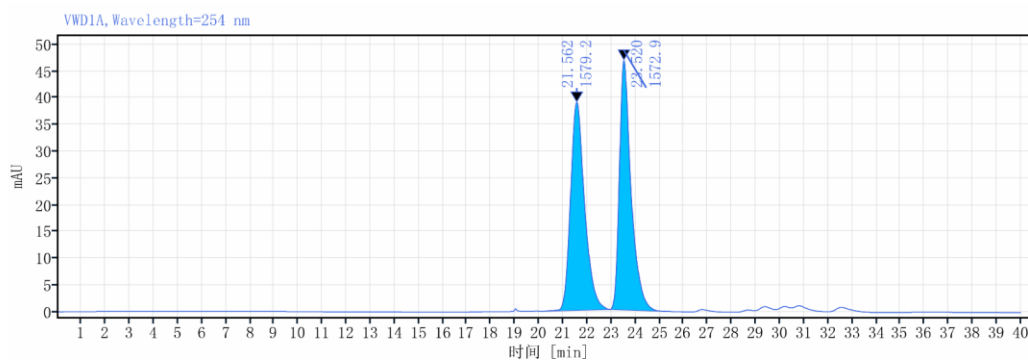

信号: VWD1A, Wavelength=254 nm

| 保留时间 [min] | 类型 | 峰宽 [min] | 峰面积     | 峰高    | 峰面积%  | 名称 |
|------------|----|----------|---------|-------|-------|----|
| 21.562     | BB | 2.71     | 1579.22 | 38.93 | 50.10 |    |
| 23.520     | BB | 2.70     | 1572.91 | 46.75 | 49.90 |    |
| 总和         |    |          | 3152.14 |       |       |    |

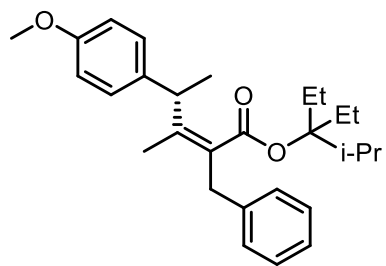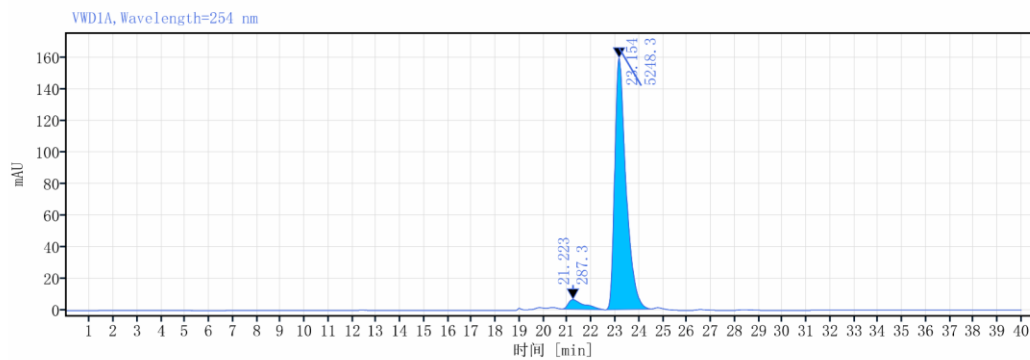

信号: VWD1A, Wavelength=254 nm

| 保留时间 [min] | 类型 | 峰宽 [min] | 峰面积     | 峰高     | 峰面积%  | 名称 |
|------------|----|----------|---------|--------|-------|----|
| 21.223     | BB | 1.81     | 287.26  | 6.12   | 5.19  |    |
| 23.154     | BB | 1.92     | 5248.28 | 159.26 | 94.81 |    |
| 总和         |    |          | 5535.54 |        |       |    |

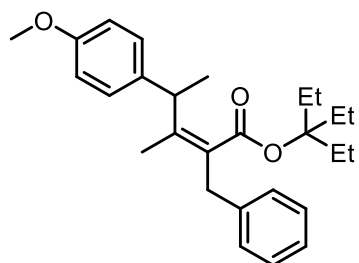

HPLC using two AD-H columns (hexane: i-PrOH=98.5:1.5, 0.5 mL/min)

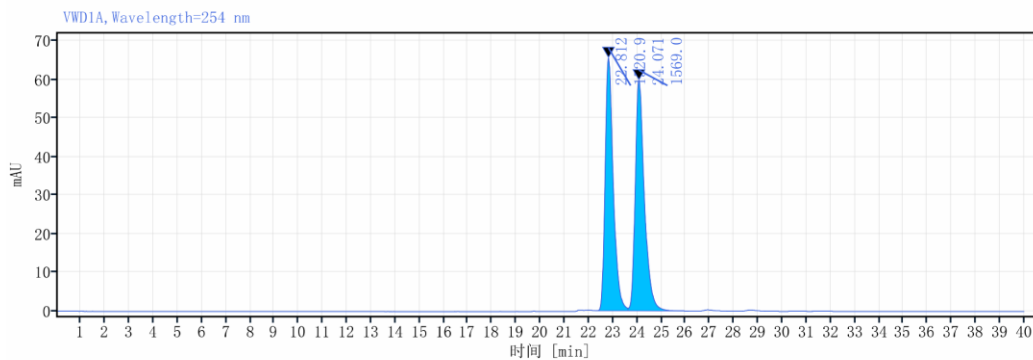

信号: VWD1A, Wavelength=254 nm

| 保留时间 [min] | 类型 | 峰宽 [min] | 峰面积     | 峰高    | 峰面积%  | 名称 |
|------------|----|----------|---------|-------|-------|----|
| 22.812     | BV | 1.33     | 1520.94 | 65.48 | 49.22 |    |
| 24.071     | VB | 2.49     | 1569.02 | 59.74 | 50.78 |    |
| 总和         |    |          | 3089.96 |       |       |    |

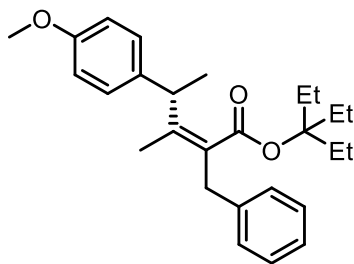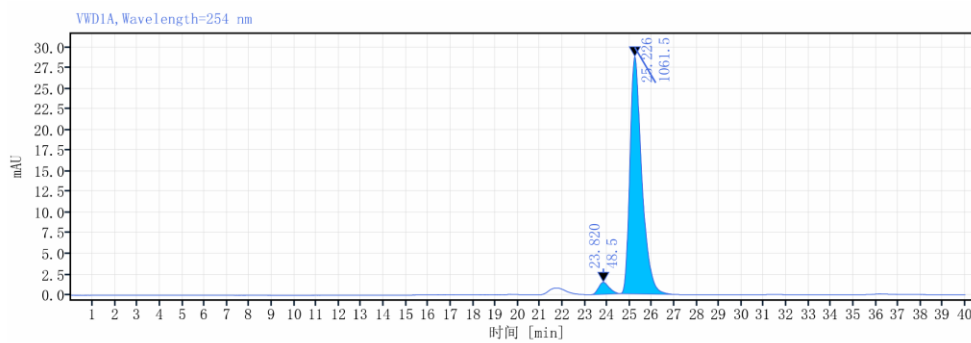

信号: VWD1A, Wavelength=254 nm

| 保留时间 [min] | 类型   | 峰宽 [min] | 峰面积     | 峰高    | 峰面积%  | 名称 |
|------------|------|----------|---------|-------|-------|----|
| 23.820     | MM m | 1.28     | 48.49   | 1.44  | 4.37  |    |
| 25.226     | BB   | 2.61     | 1061.51 | 28.72 | 95.63 |    |
| 总和         |      |          | 1110.00 |       |       |    |

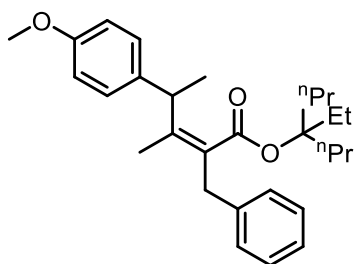

HPLC using two AD-H columns (hexane: i-PrOH=99:1, 0.5 mL/min)

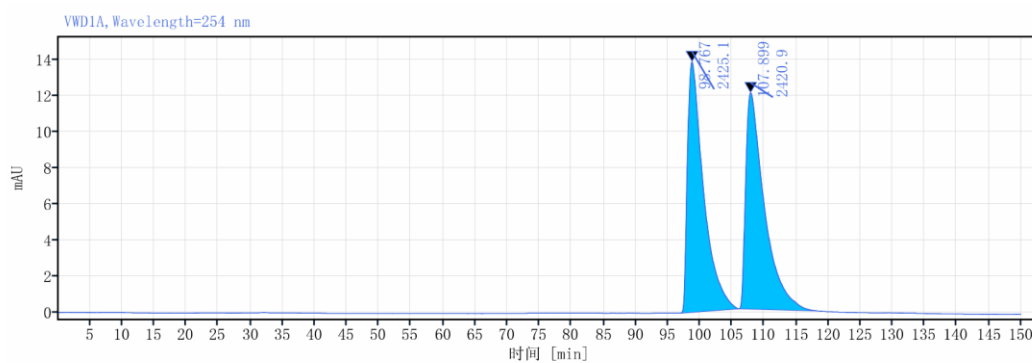

信号: VWD1A, Wavelength=254 nm

| 保留时间 [min] | 类型   | 峰宽 [min] | 峰面积     | 峰高    | 峰面积%  | 名称 |
|------------|------|----------|---------|-------|-------|----|
| 98.767     | BB   | 9.09     | 2425.07 | 13.86 | 50.04 |    |
| 107.899    | MM m | 12.25    | 2420.94 | 11.97 | 49.96 |    |
| 总和         |      |          | 4846.01 |       |       |    |

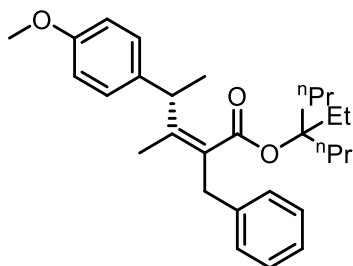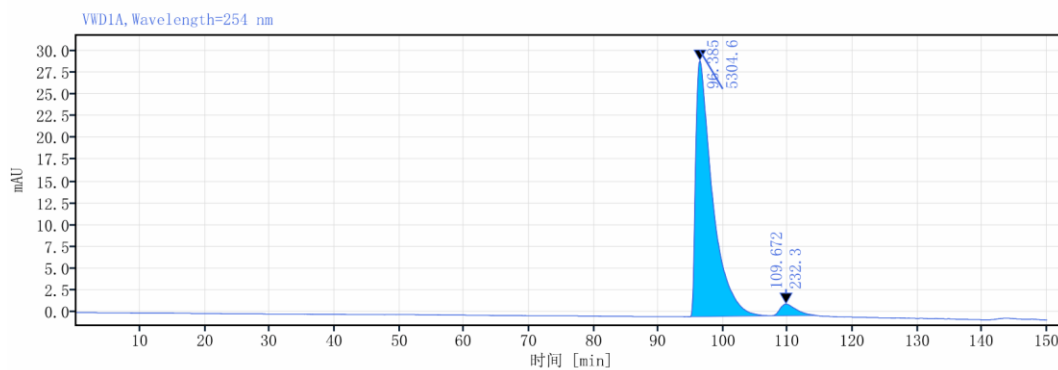

信号: VWD1A, Wavelength=254 nm

| 保留时间 [min] | 类型   | 峰宽 [min] | 峰面积     | 峰高    | 峰面积%  | 名称 |
|------------|------|----------|---------|-------|-------|----|
| 96.385     | BM m | 12.31    | 5304.60 | 29.35 | 95.81 |    |
| 109.672    | MM m | 7.21     | 232.27  | 1.33  | 4.19  |    |
| 总和         |      |          | 5536.87 |       |       |    |

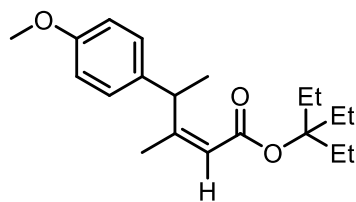

HPLC using two AD-H columns (hexane: i-PrOH=99:1, 0.5 mL/min)

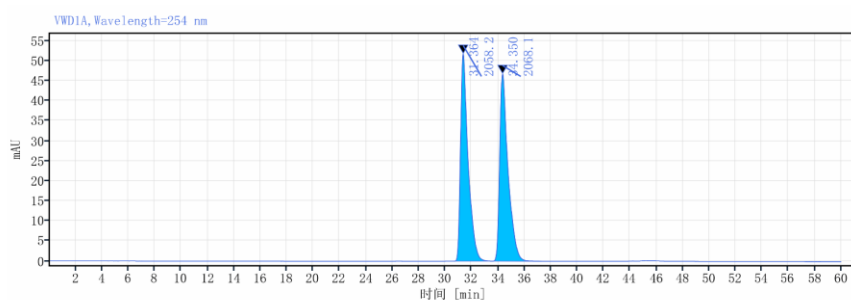

信号: VWD1A, Wavelength=254 nm

| 保留时间 [min] | 类型 | 峰宽 [min] | 峰面积     | 峰高    | 峰面积%  | 名称 |
|------------|----|----------|---------|-------|-------|----|
| 31.364     | BB | 2.92     | 2058.18 | 51.81 | 49.88 |    |
| 34.350     | BB | 3.70     | 2068.12 | 46.79 | 50.12 |    |
| 总和         |    |          | 4126.29 |       |       |    |

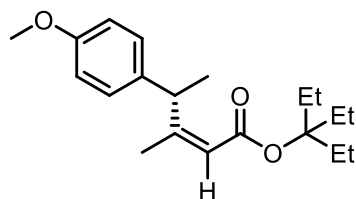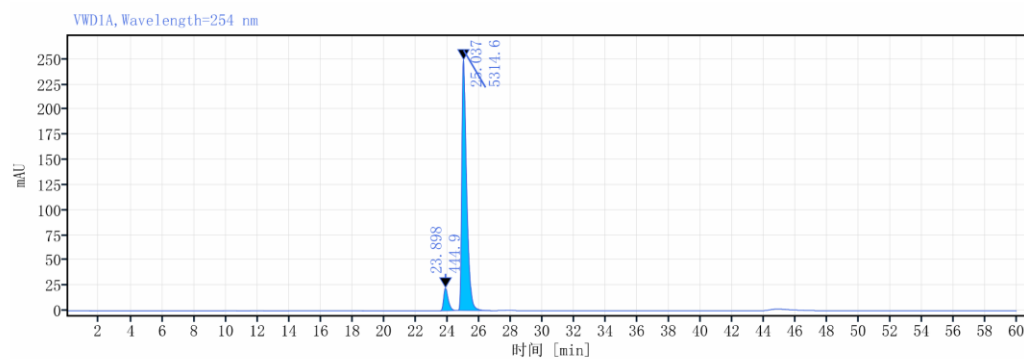

信号: VWD1A, Wavelength=254 nm

| 保留时间 [min] | 类型   | 峰宽 [min] | 峰面积     | 峰高     | 峰面积%  | 名称 |
|------------|------|----------|---------|--------|-------|----|
| 23.898     | MM m | 1.11     | 444.86  | 22.48  | 7.72  |    |
| 25.037     | MM m | 2.19     | 5314.57 | 249.06 | 92.28 |    |
| 总和         |      |          | 5759.43 |        |       |    |

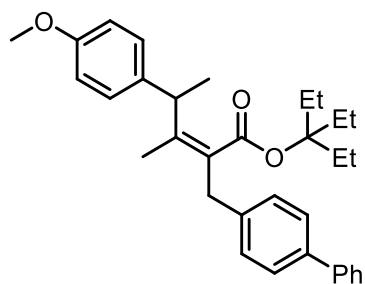

HPLC using two AD-H columns (hexane: i-PrOH=98.5:1.5, 0.5 mL/min)

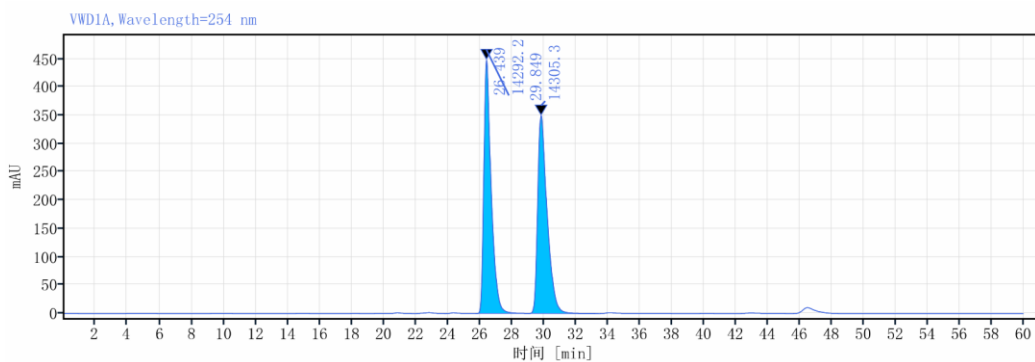

信号: VWD1A, Wavelength=254 nm

| 保留时间 [min] | 类型 | 峰宽 [min] | 峰面积      | 峰高     | 峰面积%  | 名称 |
|------------|----|----------|----------|--------|-------|----|
| 26.439     | BB | 3.33     | 14292.21 | 448.14 | 49.98 |    |
| 29.849     | BB | 4.34     | 14305.32 | 349.61 | 50.02 |    |
| 总和         |    |          | 28597.53 |        |       |    |

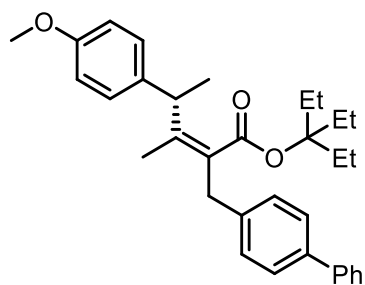

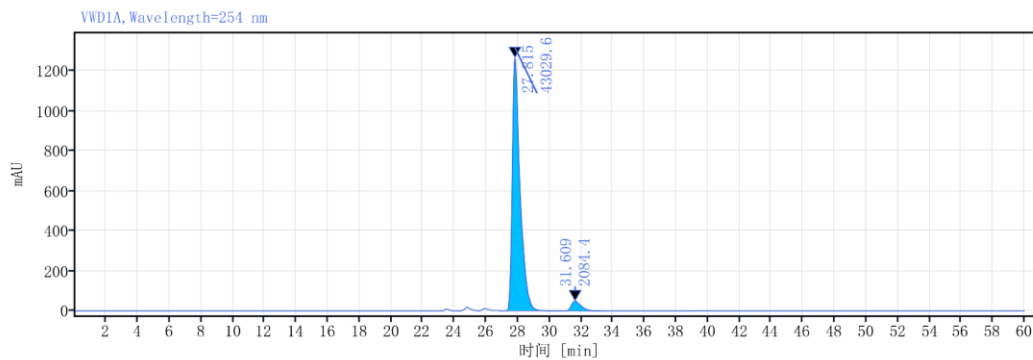

信号: VWD1A, Wavelength=254 nm

| 保留时间 [min] | 类型   | 峰宽 [min] | 峰面积      | 峰高      | 峰面积%  | 名称 |
|------------|------|----------|----------|---------|-------|----|
| 27.815     | MM m | 3.52     | 43029.57 | 1267.63 | 95.38 |    |
| 31.609     | MM m | 2.54     | 2084.39  | 49.75   | 4.62  |    |
| 总和         |      |          | 45113.96 |         |       |    |

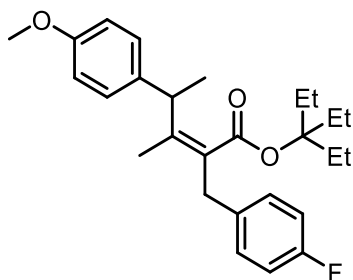

HPLC using two AD-H columns (hexane: i-PrOH=98.5:1.5, 0.5 mL/min)

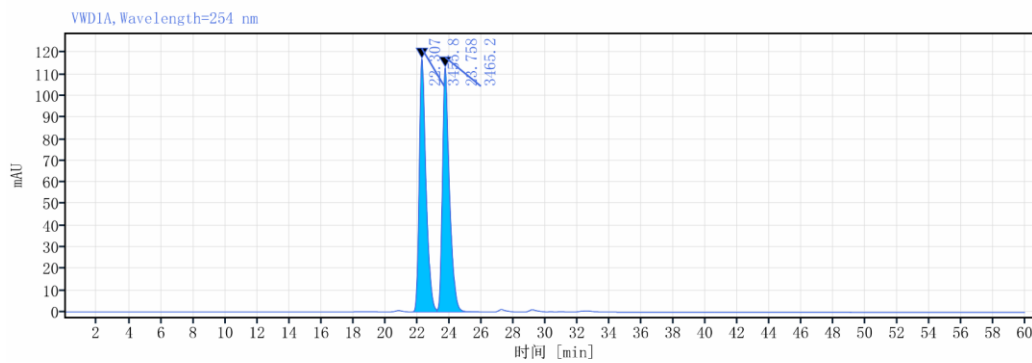

信号: VWD1A, Wavelength=254 nm

| 保留时间 [min] | 类型 | 峰宽 [min] | 峰面积     | 峰高     | 峰面积%  | 名称 |
|------------|----|----------|---------|--------|-------|----|
| 22.307     | BV | 1.59     | 3455.80 | 117.25 | 49.93 |    |
| 23.758     | VB | 2.78     | 3465.19 | 113.16 | 50.07 |    |
| 总和         |    |          | 6921.00 |        |       |    |

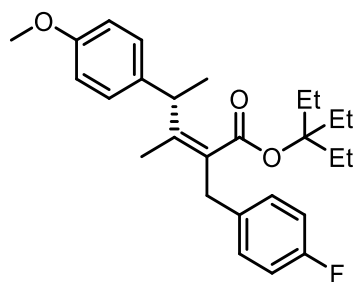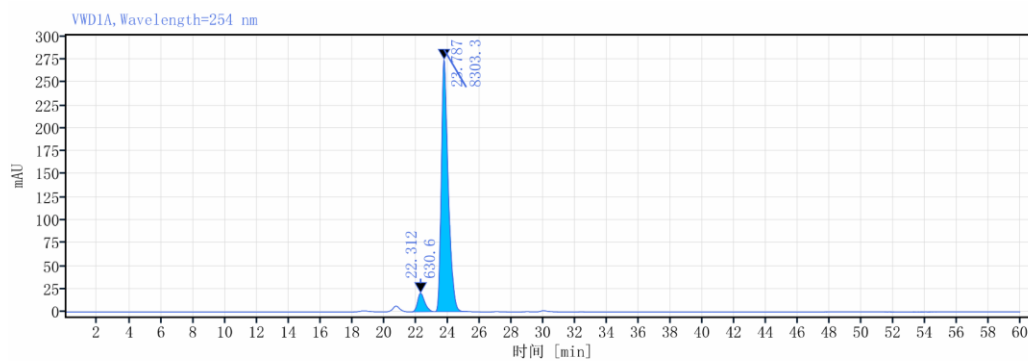

信号: VWD1A, Wavelength=254 nm

| 保留时间 [min] | 类型   | 峰宽 [min] | 峰面积     | 峰高     | 峰面积%  | 名称 |
|------------|------|----------|---------|--------|-------|----|
| 22.312     | MM m | 1.34     | 630.56  | 20.22  | 7.06  |    |
| 23.787     | MM m | 2.24     | 8303.26 | 274.24 | 92.94 |    |
| 总和         |      |          | 8933.82 |        |       |    |

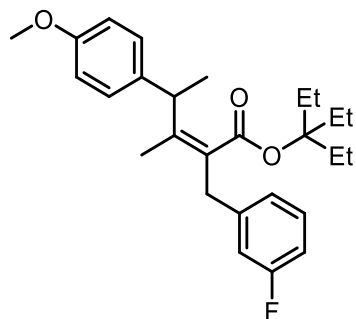

HPLC using two AD-H columns (hexane: i-PrOH=98.5:1.5, 0.5 mL/min)



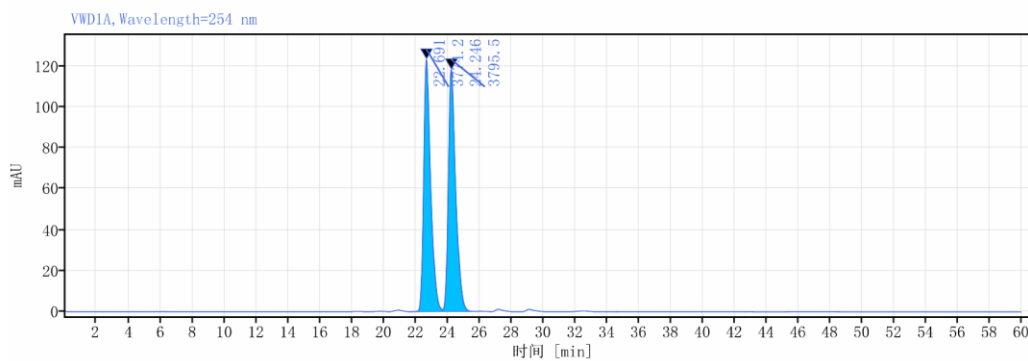

信号: VWD1A, Wavelength=254 nm

| 保留时间 [min] | 类型 | 峰宽 [min] | 峰面积     | 峰高     | 峰面积%  | 名称 |
|------------|----|----------|---------|--------|-------|----|
| 22.691     | BV | 1.99     | 3774.25 | 123.37 | 49.86 |    |
| 24.246     | VB | 2.03     | 3795.51 | 118.42 | 50.14 |    |
| 总和         |    |          | 7569.76 |        |       |    |

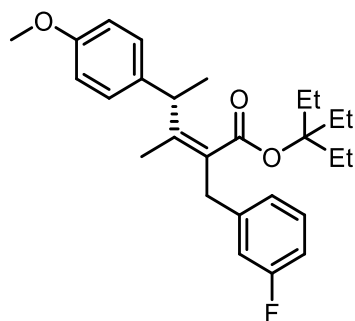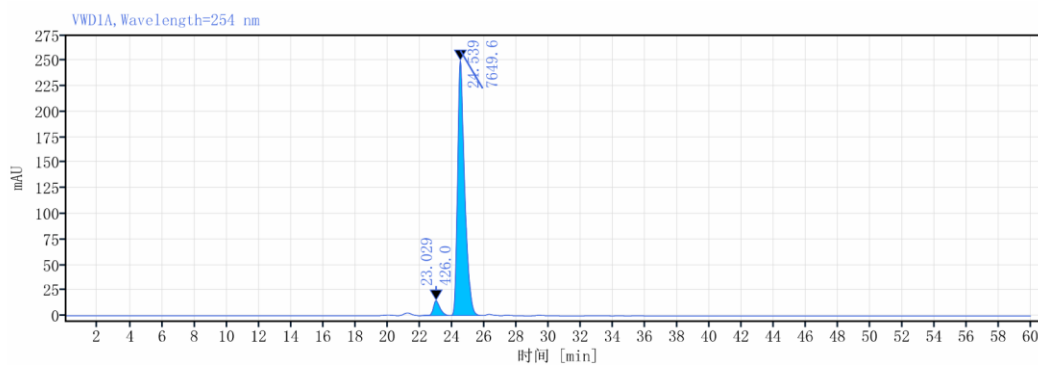

信号: VWD1A, Wavelength=254 nm

| 保留时间 [min] | 类型   | 峰宽 [min] | 峰面积     | 峰高     | 峰面积%  | 名称 |
|------------|------|----------|---------|--------|-------|----|
| 23.029     | MM m | 1.87     | 426.03  | 14.64  | 5.28  |    |
| 24.539     | MB m | 2.11     | 7649.61 | 250.02 | 94.72 |    |
| 总和         |      |          | 8075.65 |        |       |    |

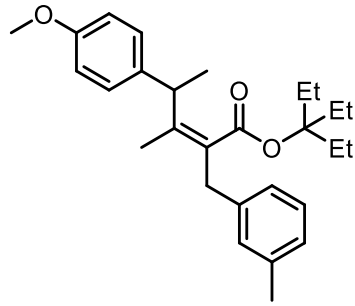

HPLC using two AD-H columns (hexane: i-PrOH=98.5:1.5, 0.5 mL/min)

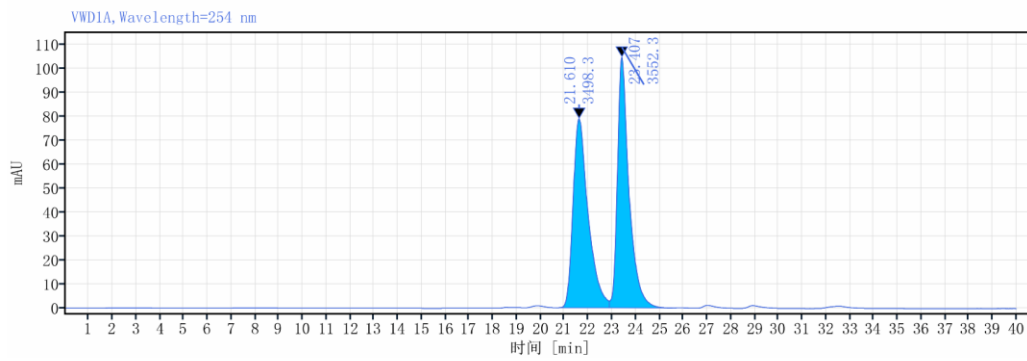

信号: VWD1A, Wavelength=254 nm

| 保留时间 [min] | 类型 | 峰宽 [min] | 峰面积     | 峰高     | 峰面积%  | 名称 |
|------------|----|----------|---------|--------|-------|----|
| 21.610     | BV | 2.24     | 3498.29 | 79.13  | 49.62 |    |
| 23.407     | VB | 2.63     | 3552.32 | 104.90 | 50.38 |    |
| 总和         |    |          | 7050.60 |        |       |    |

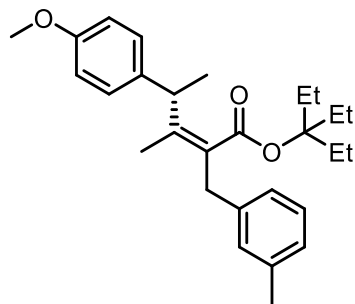

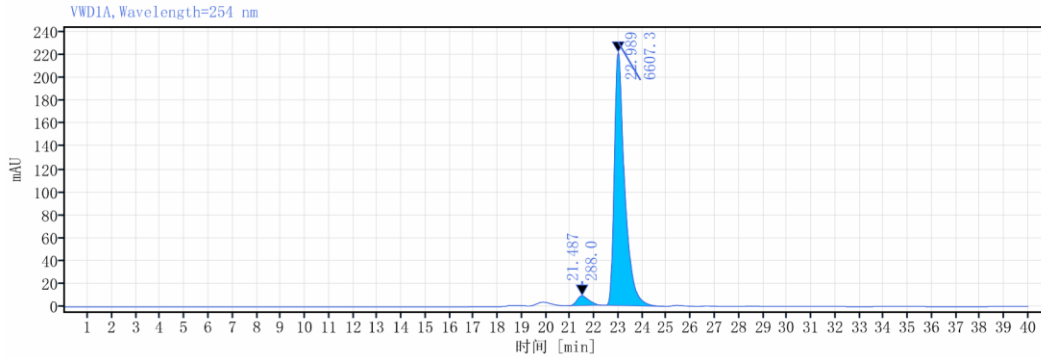

信号: VWD1A, Wavelength=254 nm

| 保留时间 [min] | 类型   | 峰宽 [min] | 峰面积     | 峰高     | 峰面积%  | 名称 |
|------------|------|----------|---------|--------|-------|----|
| 21.487     | BM m | 1.34     | 287.97  | 8.53   | 4.18  |    |
| 22.989     | MB m | 2.73     | 6607.34 | 221.18 | 95.82 |    |
| 总和         |      |          | 6895.31 |        |       |    |

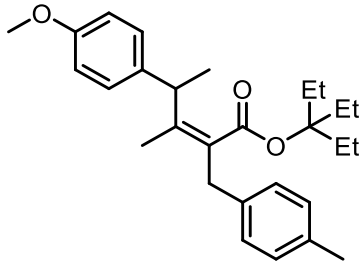

HPLC using two AD-H columns (hexane: i-PrOH=98.5:1.5, 0.5 mL/min)

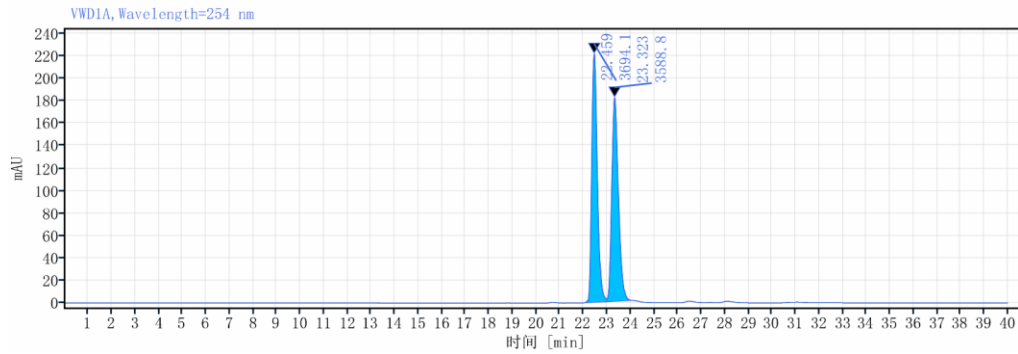

信号: VWD1A, Wavelength=254 nm

| 保留时间 [min] | 类型 | 峰宽 [min] | 峰面积     | 峰高     | 峰面积%  | 名称 |
|------------|----|----------|---------|--------|-------|----|
| 22.459     | BV | 0.93     | 3694.14 | 221.98 | 50.72 |    |
| 23.323     | VB | 1.07     | 3588.84 | 181.97 | 49.28 |    |
| 总和         |    |          | 7282.97 |        |       |    |

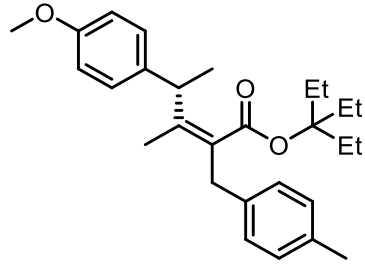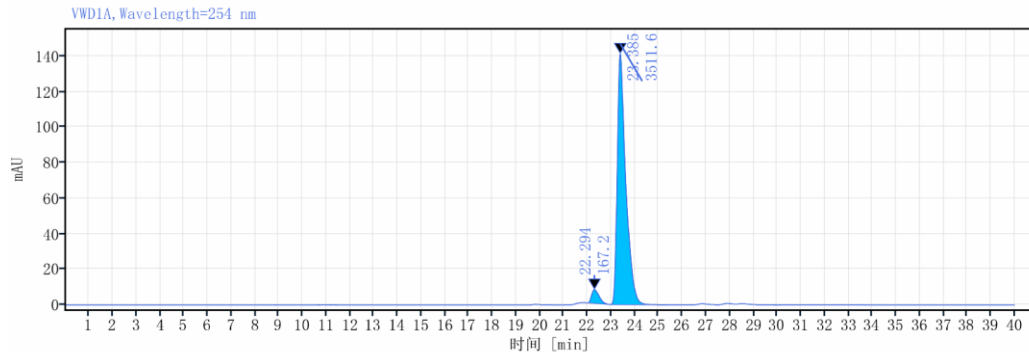

信号: VWD1A, Wavelength=254 nm

| 保留时间 [min] | 类型   | 峰宽 [min] | 峰面积     | 峰高     | 峰面积%  | 名称 |
|------------|------|----------|---------|--------|-------|----|
| 22.294     | MM m | 0.84     | 167.21  | 7.76   | 4.55  |    |
| 23.385     | MB m | 2.39     | 3511.64 | 141.21 | 95.45 |    |
| 总和         |      |          | 3678.84 |        |       |    |

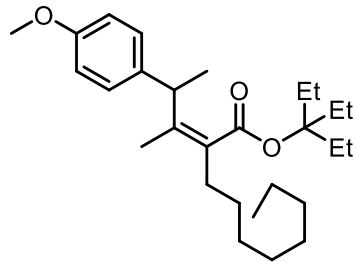

HPLC using two AD-H columns (hexane: i-PrOH=99:1, 0.5 mL/min)

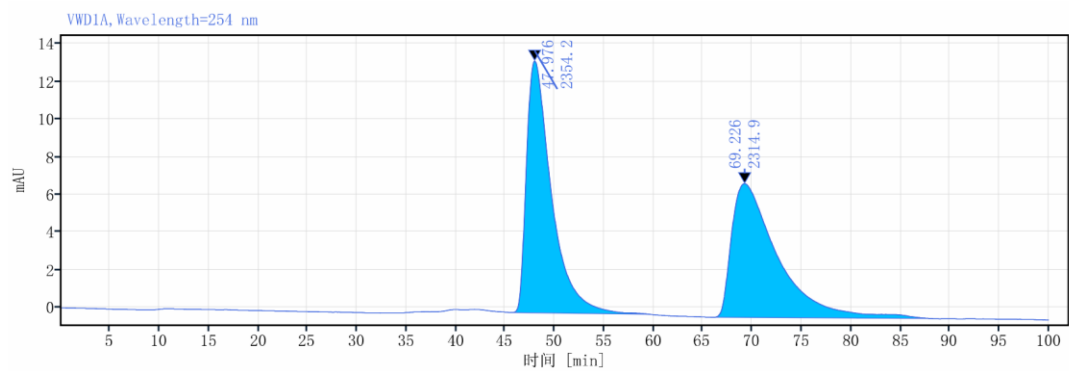

信号: VWD1A, Wavelength=254 nm

| 保留时间 [min] | 类型   | 峰宽 [min] | 峰面积     | 峰高    | 峰面积%  | 名称 |
|------------|------|----------|---------|-------|-------|----|
| 47.976     | MM m | 14.08    | 2354.15 | 13.38 | 50.42 |    |
| 69.226     | MM m | 22.42    | 2314.87 | 7.12  | 49.58 |    |
| 总和         |      |          | 4669.02 |       |       |    |

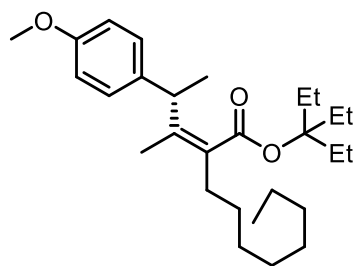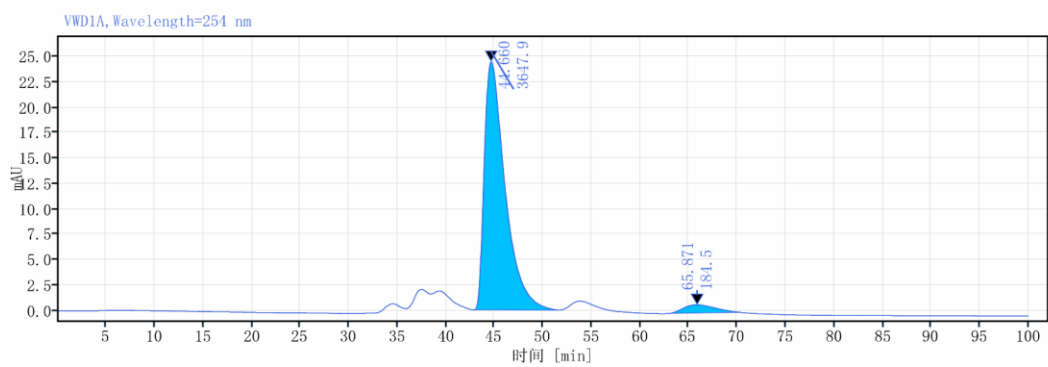

信号: VWD1A, Wavelength=254 nm

| 保留时间 [min] | 类型   | 峰宽 [min] | 峰面积     | 峰高    | 峰面积%  | 名称 |
|------------|------|----------|---------|-------|-------|----|
| 44.660     | BB   | 8.68     | 3647.85 | 24.44 | 95.18 |    |
| 65.871     | MM m | 7.32     | 184.54  | 0.81  | 4.82  |    |
| 总和         |      |          | 3832.39 |       |       |    |

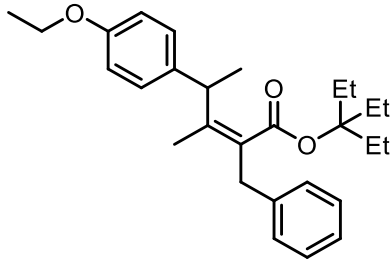

HPLC using two OD-H columns (hexane: i-PrOH=99:1, 0.5 mL/min)

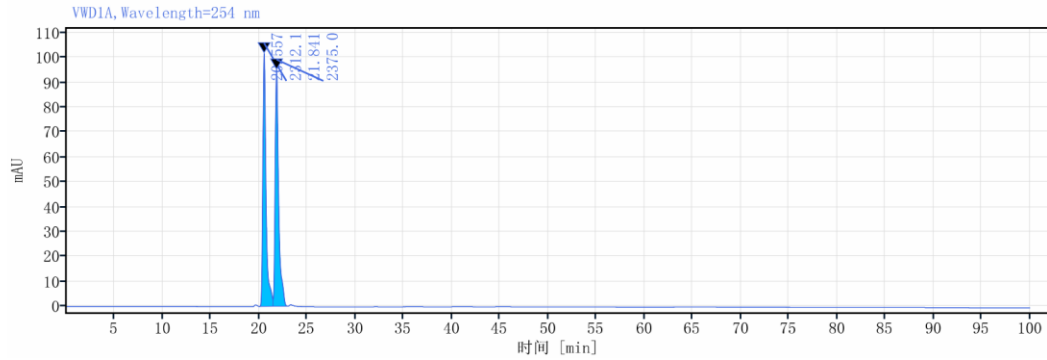

信号: VWD1A, Wavelength=254 nm

| 保留时间 [min] | 类型 | 峰宽 [min] | 峰面积     | 峰高     | 峰面积%  | 名称 |
|------------|----|----------|---------|--------|-------|----|
| 20.557     | BV | 1.41     | 2312.13 | 101.71 | 49.33 |    |
| 21.841     | VB | 1.54     | 2374.99 | 95.10  | 50.67 |    |
| 总和         |    |          | 4687.12 |        |       |    |

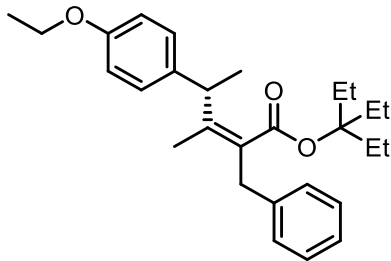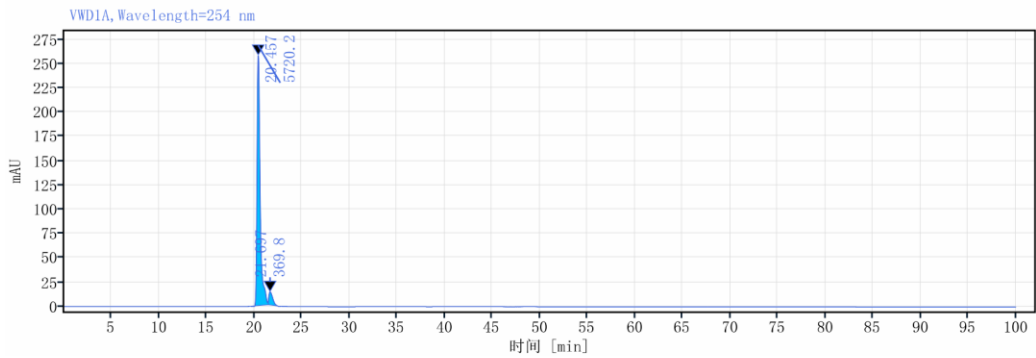

信号: VWD1A, Wavelength=254 nm

| 保留时间 [min] | 类型   | 峰宽 [min] | 峰面积     | 峰高     | 峰面积%  | 名称 |
|------------|------|----------|---------|--------|-------|----|
| 20.457     | MM m | 1.79     | 5720.16 | 257.49 | 93.93 |    |
| 21.697     | MM m | 0.96     | 369.78  | 13.49  | 6.07  |    |
| 总和         |      |          | 6089.94 |        |       |    |

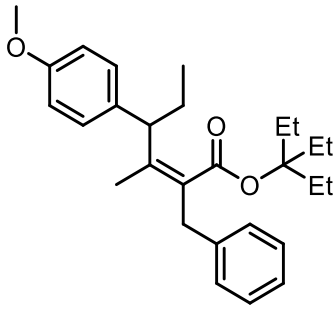

HPLC using two AD-H columns (hexane: i-PrOH=99:1, 0.5 mL/min)

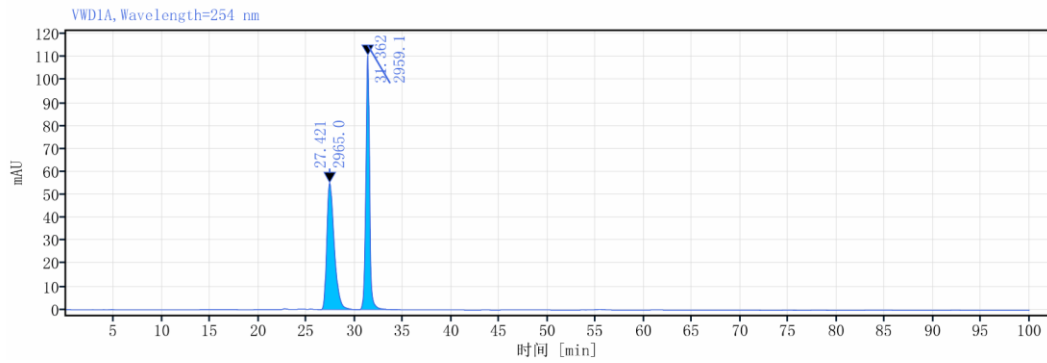

信号: VWD1A, Wavelength=254 nm

| 保留时间 [min] | 类型 | 峰宽 [min] | 峰面积     | 峰高     | 峰面积%  | 名称 |
|------------|----|----------|---------|--------|-------|----|
| 27.421     | BB | 3.92     | 2964.98 | 55.12  | 50.05 |    |
| 31.362     | BB | 4.02     | 2959.10 | 110.68 | 49.95 |    |
| 总和         |    |          | 5924.08 |        |       |    |

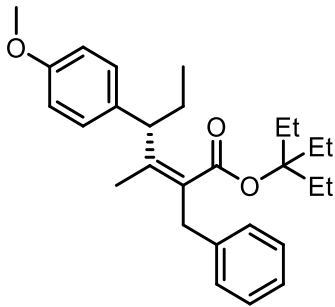

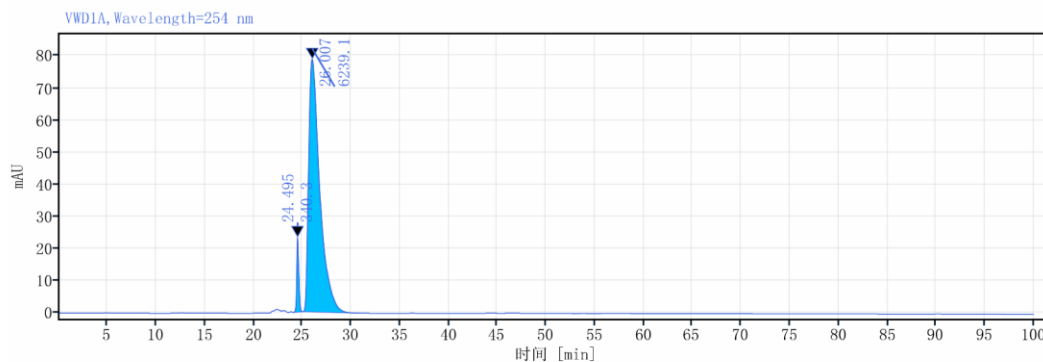

信号: VWD1A, Wavelength=254 nm

| 保留时间 [min] | 类型 | 峰宽 [min] | 峰面积     | 峰高    | 峰面积%  | 名称 |
|------------|----|----------|---------|-------|-------|----|
| 24.495     | BB | 0.97     | 340.34  | 23.35 | 5.17  |    |
| 26.007     | BB | 5.71     | 6239.13 | 78.76 | 94.83 |    |
| 总和         |    |          | 6579.47 |       |       |    |

## 9. Definition of the absolute configuration

The absolute configuration of derivative **7**

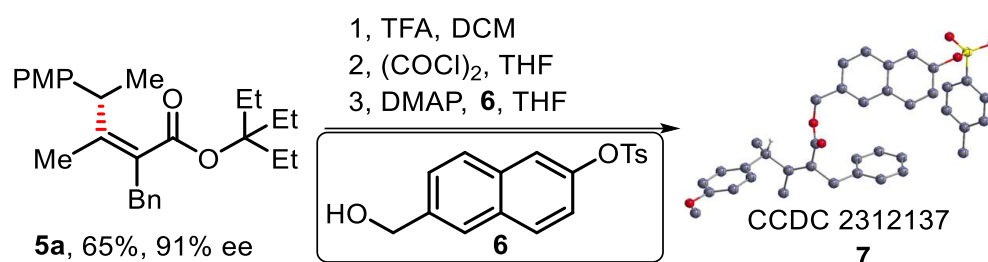

To a stirred solution of **5a** (245 mg, 0.6 mmol) in DCM (4 mL) was added TFA (0.8 mL) dropwise at 0 °C. After being stirred for 1 h, the reaction mixture was warmed up to room temperature. After 3 h, the reaction mixture was concentrated in vacuo. After the addition of hexane to the residue, the solvent was evaporated at 40 °C to remove the residual TFA. The same manipulation was conducted once again with hexane and twice with toluene;

Under Ar, to a stirred solution of the acid in THF, was added (COCl)<sub>2</sub> (51 μL, 0.6 mmol), and a drop of DMF at 0 °C, after being stirred for 1 h, the solvent was removed in vacuo. To a stirred solution of DMAP (110 mg, 0.9 mmol), **6** in THF, the mixture prepared last step in THF was added dropwise at 0 °C. After being stirred overnight, the reaction mixture was concentrated in vacuo and was purified by flash chromatography on silica gel to afford the corresponding product in 42% yield (156 mg).

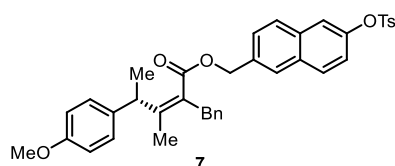



$^1\text{H}$  NMR (400 MHz, Chloroform-*d*)  $\delta$  7.65 – 7.62 (m, 2H), 7.56 – 7.50 (m, 3H), 7.36 (d,  $J = 2.4$  Hz, 1H), 7.21 – 6.99 (m, 11H), 6.73 (d,  $J = 8.7$  Hz, 2H), 5.17 (s, 2H), 4.50 (q,  $J = 7.0$  Hz, 1H), 3.69 (s, 3H), 3.64 (d,  $J = 6.1$  Hz, 2H), 2.35 (s, 3H), 1.47 (s, 3H), 1.34 (d,  $J = 7.1$  Hz, 3H).

$^{13}\text{C}$  NMR (101 MHz, Chloroform-*d*)  $\delta$  169.3, 157.9, 149.9, 147.4, 145.4, 139.1, 135.1, 134.2, 132.9, 132.4, 131.6, 129.7(3C), 128.5, 128.4, 128.4, 128.1, 128.1, 126.3, 126.6, 126.5, 126.0, 121.4, 119.7, 113.5, 65.9, 55.2, 40.9, 35.8, 21.7, 17.1, 14.5.

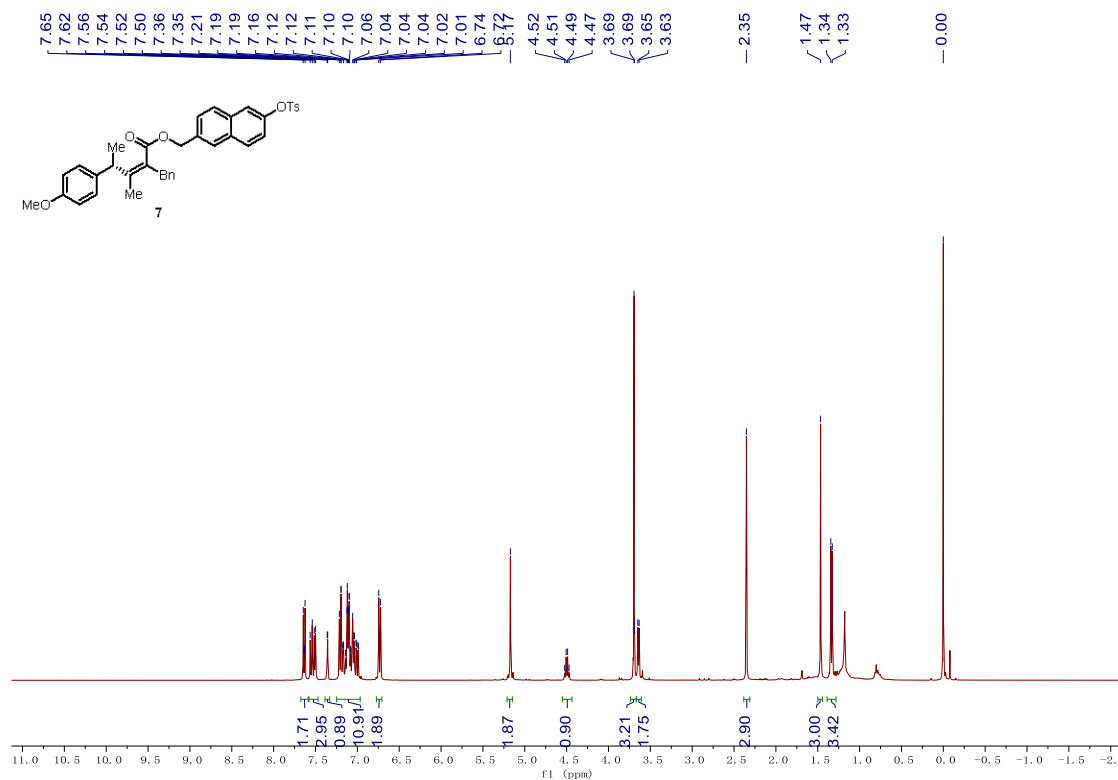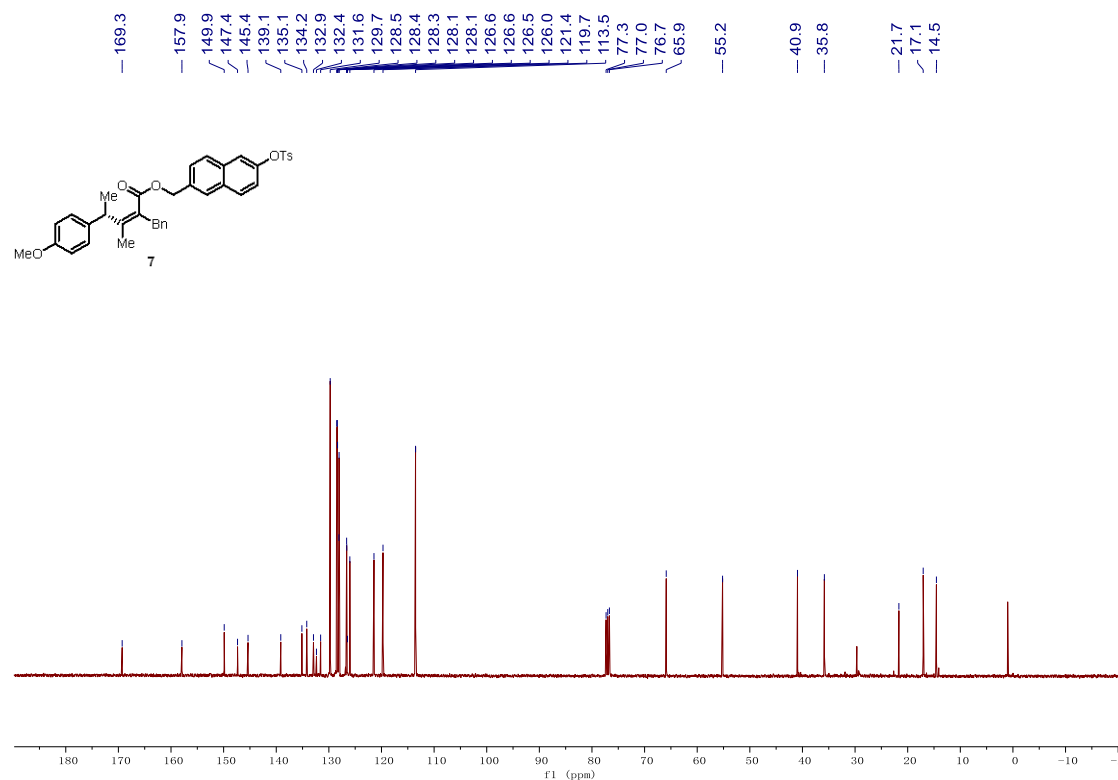

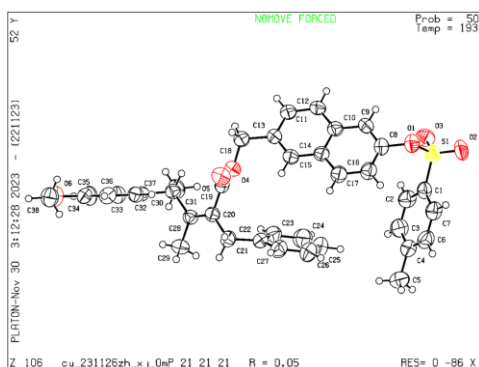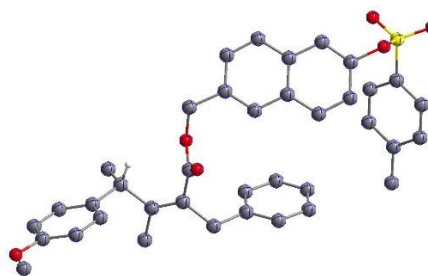

CCDC 2312137

|                                             |                                                               |
|---------------------------------------------|---------------------------------------------------------------|
| Identification code                         | cu_231126ZH_XJ_0m                                             |
| Empirical formula                           | C <sub>38</sub> H <sub>36</sub> O <sub>6</sub> S              |
| Formula weight                              | 620.73                                                        |
| Temperature/K                               | 193.00                                                        |
| Crystal system                              | orthorhombic                                                  |
| Space group                                 | P2 <sub>1</sub> 2 <sub>1</sub> 2 <sub>1</sub>                 |
| a/Å                                         | 6.1870(17)                                                    |
| b/Å                                         | 8.034(2)                                                      |
| c/Å                                         | 65.131(17)                                                    |
| α/°                                         | 90                                                            |
| β/°                                         | 90                                                            |
| γ/°                                         | 90                                                            |
| Volume/Å <sup>3</sup>                       | 3237.5(15)                                                    |
| Z                                           | 4                                                             |
| ρ <sub>calc</sub> /cm <sup>3</sup>          | 1.274                                                         |
| μ/mm <sup>-1</sup>                          | 1.264                                                         |
| F(000)                                      | 1312.0                                                        |
| Crystal size/mm <sup>3</sup>                | 0.13 × 0.12 × 0.1                                             |
| Radiation                                   | CuKα (λ = 1.54178)                                            |
| 2θ range for data collection/°              | 5.428 to 136.298                                              |
| Index ranges                                | -6 ≤ h ≤ 6, -9 ≤ k ≤ 8, -76 ≤ l ≤ 78                          |
| Reflections collected                       | 39975                                                         |
| Independent reflections                     | 5730 [R <sub>int</sub> = 0.0991, R <sub>sigma</sub> = 0.0518] |
| Data/restraints/parameters                  | 5730/0/411                                                    |
| Goodness-of-fit on F <sup>2</sup>           | 1.053                                                         |
| Final R indexes [I > 2σ (I)]                | R <sub>1</sub> = 0.0516, wR <sub>2</sub> = 0.1224             |
| Final R indexes [all data]                  | R <sub>1</sub> = 0.0736, wR <sub>2</sub> = 0.1354             |
| Largest diff. peak/hole / e Å <sup>-3</sup> | 0.24/-0.21                                                    |
| Flack parameter                             | 0.043(13)                                                     |

Table 2 Fractional Atomic Coordinates ( $\times 10^4$ ) and Equivalent Isotropic Displacement Parameters ( $\text{\AA}^2 \times 10^3$ ) for cu\_231126ZH\_XJ\_0m.  $U_{\text{eq}}$  is defined as 1/3 of the trace of the orthogonalised  $U_{ij}$  tensor.

| atom  | x        | y          | z         | $U(\text{eq})$ |
|-------|----------|------------|-----------|----------------|
| S(1)  | 1236(2)  | 6674.4(15) | 5348.0(2) | 60.3(4)        |
| O(1)  | 2605(6)  | 7648(4)    | 5520.0(4) | 61.1(9)        |
| C(1)  | 2660(8)  | 4817(6)    | 5315.7(6) | 53.7(11)       |
| O(2)  | 1461(6)  | 7731(4)    | 5172.7(5) | 76.5(11)       |
| C(2)  | 1885(8)  | 3349(6)    | 5401.6(7) | 63.6(13)       |
| O(3)  | -832(5)  | 6326(4)    | 5429.1(5) | 73.1(10)       |
| C(3)  | 3062(9)  | 1894(6)    | 5383.2(8) | 69.3(14)       |
| O(4)  | 4043(5)  | 2411(3)    | 6636.5(4) | 51.0(7)        |
| C(4)  | 5024(9)  | 1893(6)    | 5281.2(7) | 61.7(13)       |
| O(5)  | 7271(6)  | 3520(4)    | 6712.0(5) | 64.4(9)        |
| C(5)  | 6304(10) | 298(7)     | 5264.0(8) | 84.6(17)       |
| O(6)  | 8801(6)  | -988(4)    | 7753.0(5) | 73.2(10)       |
| C(6)  | 5767(9)  | 3354(7)    | 5194.2(7) | 67.6(13)       |
| C(7)  | 4613(8)  | 4817(6)    | 5211.1(7) | 60.9(12)       |
| C(8)  | 2912(8)  | 6870(6)    | 5713.7(6) | 53.1(11)       |
| C(9)  | 1385(8)  | 6997(5)    | 5861.1(7) | 53.9(11)       |
| C(10) | 1790(7)  | 6278(5)    | 6057.7(6) | 50.8(11)       |
| C(11) | 269(8)   | 6358(6)    | 6218.0(7) | 55.5(11)       |
| C(12) | 687(8)   | 5604(6)    | 6403.0(7) | 55.9(12)       |
| C(13) | 2664(8)  | 4794(5)    | 6440.9(6) | 48.7(10)       |
| C(14) | 4170(8)  | 4711(5)    | 6288.4(6) | 52.7(11)       |
| C(15) | 3772(7)  | 5436(5)    | 6093.2(6) | 50.5(10)       |
| C(16) | 5324(8)  | 5379(6)    | 5933.8(7) | 60.2(12)       |
| C(17) | 4899(8)  | 6079(6)    | 5745.1(7) | 60.6(13)       |

|       |          |          |           |          |
|-------|----------|----------|-----------|----------|
| C(18) | 3007(8)  | 4016(6)  | 6651.6(7) | 55.1(11) |
| C(19) | 6172(8)  | 2301(5)  | 6676.7(6) | 48.9(10) |
| C(20) | 6993(7)  | 563(5)   | 6667.0(6) | 48.1(10) |
| C(21) | 8749(8)  | 328(6)   | 6509.4(6) | 54.9(11) |
| C(22) | 8111(8)  | 634(5)   | 6288.3(6) | 52.6(11) |
| C(23) | 6130(9)  | 129(7)   | 6212.5(7) | 68.9(13) |
| C(24) | 5654(12) | 355(8)   | 6005.3(9) | 91(2)    |
| C(25) | 7120(15) | 1076(9)  | 5876.9(9) | 99(2)    |
| C(26) | 9077(13) | 1593(9)  | 5949.9(9) | 94(2)    |
| C(27) | 9577(9)  | 1375(7)  | 6154.8(7) | 69.3(14) |
| C(28) | 6276(7)  | -589(5)  | 6799.9(6) | 47.4(10) |
| C(29) | 7054(8)  | -2374(5) | 6792.1(8) | 58.3(12) |
| C(30) | 4708(7)  | -204(6)  | 6972.5(6) | 51.8(11) |
| C(31) | 2612(8)  | -1181(7) | 6946.0(8) | 70.7(14) |
| C(32) | 5834(7)  | -473(5)  | 7180.2(6) | 47.5(10) |
| C(33) | 5077(8)  | -1561(6) | 7328.9(7) | 56.9(11) |
| C(34) | 6101(9)  | -1710(6) | 7517.5(7) | 64.5(12) |
| C(35) | 7927(8)  | -772(6)  | 7559.6(6) | 55.8(12) |
| C(36) | 8739(8)  | 299(6)   | 7412.9(6) | 55.6(11) |
| C(37) | 7681(8)  | 429(5)   | 7226.2(6) | 52.1(11) |
| C(38) | 10712(9) | -62(7)   | 7800.2(8) | 76.6(15) |

## 10. DFT calculations

All density functional theory (DFT) calculations are carried out by Gaussian 09B program<sup>[2]</sup>. Geometry optimizations are conducted by B3LYP functional<sup>[3]</sup> and Grimme's dispersion correction with Becke-Johnson damping<sup>[4]</sup>. And all atoms are treated with the def2-SVP basis set<sup>[5]</sup>. The solvation effects of DMF are taken into consideration by the Integral Equation Formalism PCM (IEFPCM)<sup>[6]</sup>. Vibrational frequency analyses are conducted at the same level to ensure all stationary

points as local minima (zero imaginary frequencies). The single-point energy calculations are evaluated with M06-2X functional<sup>[7]</sup>, and all atoms are treated with def2-TZVP basis set<sup>[5]</sup>. The solvent (DMF) effects are calculated with the Solvent Model Density (SMD) method<sup>[8]</sup>. All optimized geometric figures are plotted by CYLview<sup>[9]</sup>.

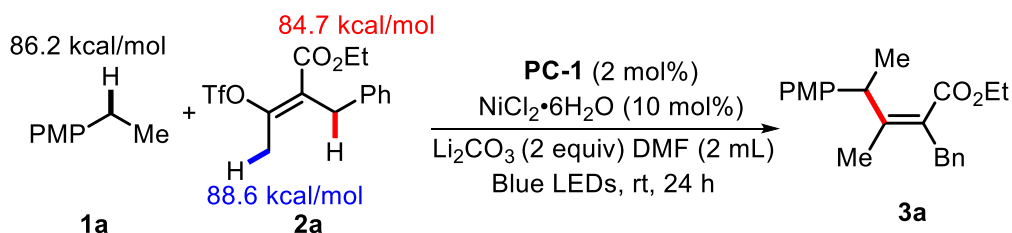

Upon completion of the geometry optimizations, BDE and BDFE calculations were performed for the target molecule (AB) and its dissociation products (A· and B·). The BDE was calculated using the following equation:

$$\text{BDE} = E(\text{A}\cdot) + E(\text{B}\cdot) - E(\text{AB})$$

where  $E(\text{A}\cdot)$ ,  $E(\text{B}\cdot)$ , and  $E(\text{AB})$  represent the single-point energies of the A radical, B radical, and the AB molecule, respectively.

The BDFE was calculated using the following equation:

$$\text{BDFE} = G(\text{A}\cdot) + G(\text{B}\cdot) - G(\text{AB})$$

where  $G(\text{A}\cdot)$ ,  $G(\text{B}\cdot)$ , and  $G(\text{AB})$  represent the Gibbs free energies of the A radical, B radical, and the AB molecule, respectively.

The calculated BDE and BDFE values for the bond dissociation process are summarized in Table 1.

**Supplementary Table 1.** The computational BDE and BDFE in **1a** and **2a**.

|               | Electronic energy<br>(a.u.) |                  | BDE<br>(kcal/mol) | BDFE<br>(kcal/mol) |
|---------------|-----------------------------|------------------|-------------------|--------------------|
| <br><b>1a</b> | -425.375065                 | C-H <sup>a</sup> | 98.29             | 88.20              |
|               |                             | C-H <sup>b</sup> | 86.19             | 75.96              |
| <br><b>2a</b> | -1616.368260                | C-H <sup>c</sup> | 88.56             | 78.98              |
|               |                             | C-H <sup>d</sup> | 84.73             | 75.06              |

**Images of key structures**

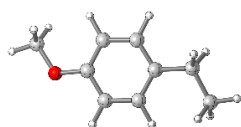

**1a**

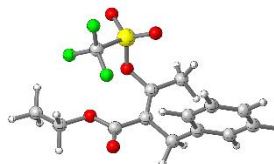

**2a**

**Cartesian Coordinates of All the Optimized Geometries**

**1a**

|   |                 |                 |                 |
|---|-----------------|-----------------|-----------------|
| O | -2.713455000000 | -1.484598000000 | 0.000203000000  |
| C | -1.545989000000 | -0.789280000000 | 0.000098000000  |
| C | -0.364927000000 | -1.546154000000 | 0.000132000000  |
| C | 0.879679000000  | -0.916595000000 | 0.000036000000  |
| C | 0.992732000000  | 0.483289000000  | -0.000098000000 |
| C | -0.198904000000 | 1.223240000000  | -0.000126000000 |
| C | -1.455746000000 | 0.612153000000  | -0.000032000000 |
| C | 2.325652000000  | 1.209036000000  | -0.000223000000 |
| C | -3.933139000000 | -0.769833000000 | 0.000141000000  |
| C | 3.571265000000  | 0.327322000000  | 0.000009000000  |
| H | -0.443764000000 | -2.635468000000 | 0.000236000000  |
| H | 1.776123000000  | -1.538735000000 | 0.000067000000  |
| H | -0.148076000000 | 2.316244000000  | -0.000224000000 |
| H | -2.351182000000 | 1.233262000000  | -0.000057000000 |
| H | 2.356424000000  | 1.880398000000  | -0.876916000000 |
| H | 2.356371000000  | 1.880794000000  | 0.876167000000  |
| H | -4.735888000000 | -1.518509000000 | 0.000216000000  |
| H | -4.034343000000 | -0.134540000000 | 0.897376000000  |
| H | -4.034351000000 | -0.134711000000 | -0.897213000000 |
| H | 4.481073000000  | 0.946787000000  | -0.000066000000 |
| H | 3.610174000000  | -0.321877000000 | 0.889418000000  |
| H | 3.610268000000  | -0.322220000000 | -0.889144000000 |

**2a**

|   |                 |                 |                 |
|---|-----------------|-----------------|-----------------|
| C | 0.267155000000  | 0.616814000000  | 1.325306000000  |
| C | 0.871603000000  | -0.373359000000 | 0.635813000000  |
| C | -0.562526000000 | 0.450324000000  | 2.556237000000  |
| C | 0.650773000000  | -1.820642000000 | 1.038158000000  |
| O | 0.442665000000  | 1.951620000000  | 0.916108000000  |
| S | -0.789314000000 | 2.861936000000  | 0.357399000000  |
| O | -0.335542000000 | 4.232084000000  | 0.467473000000  |
| O | -2.067696000000 | 2.397523000000  | 0.868994000000  |
| C | -0.773341000000 | 2.417163000000  | -1.472920000000 |
| F | -0.807527000000 | 1.097263000000  | -1.615243000000 |

---

|   |                 |                 |                 |
|---|-----------------|-----------------|-----------------|
| F | -1.852490000000 | 2.951135000000  | -2.020402000000 |
| F | 0.311155000000  | 2.904568000000  | -2.051551000000 |
| C | 1.676473000000  | -0.182432000000 | -0.609217000000 |
| O | 1.815236000000  | -1.066608000000 | -1.432610000000 |
| O | 2.241993000000  | 1.017447000000  | -0.724607000000 |
| C | 3.607492000000  | 2.663507000000  | -1.772630000000 |
| C | 3.011816000000  | 1.280999000000  | -1.916078000000 |
| C | -0.752936000000 | -2.309198000000 | 0.727147000000  |
| C | -1.265778000000 | -2.210597000000 | -0.576996000000 |
| C | -2.560773000000 | -2.644400000000 | -0.866658000000 |
| C | -3.366299000000 | -3.184557000000 | 0.142854000000  |
| C | -2.864416000000 | -3.288078000000 | 1.442470000000  |
| C | -1.566743000000 | -2.850722000000 | 1.730662000000  |
| H | -0.464246000000 | 1.339326000000  | 3.194374000000  |
| H | -0.251148000000 | -0.434084000000 | 3.124870000000  |
| H | -1.626823000000 | 0.332833000000  | 2.300213000000  |
| H | 1.379058000000  | -2.437209000000 | 0.493866000000  |
| H | 0.855526000000  | -1.950036000000 | 2.110817000000  |
| H | 4.184503000000  | 2.916145000000  | -2.674821000000 |
| H | 2.815960000000  | 3.415711000000  | -1.641316000000 |
| H | 4.282168000000  | 2.711172000000  | -0.904369000000 |
| H | 3.782509000000  | 0.502084000000  | -2.019341000000 |
| H | 2.342207000000  | 1.205468000000  | -2.786738000000 |
| H | -0.638085000000 | -1.793081000000 | -1.366705000000 |
| H | -2.944463000000 | -2.561099000000 | -1.886597000000 |
| H | -4.380516000000 | -3.521768000000 | -0.084006000000 |
| H | -3.484680000000 | -3.706807000000 | 2.238801000000  |
| H | -1.182947000000 | -2.930445000000 | 2.751243000000  |

**1a-OMe-H<sup>a</sup>**

|   |                 |                 |                 |
|---|-----------------|-----------------|-----------------|
| O | -2.729915000000 | -1.469860000000 | 0.111199000000  |
| C | -1.545415000000 | -0.781047000000 | 0.070297000000  |
| C | -0.375776000000 | -1.546859000000 | 0.050820000000  |
| C | 0.870075000000  | -0.917479000000 | 0.021774000000  |
| C | 0.981561000000  | 0.481810000000  | 0.011289000000  |
| C | -0.208600000000 | 1.227598000000  | 0.039870000000  |
| C | -1.463608000000 | 0.618368000000  | 0.072091000000  |
| C | 2.313893000000  | 1.206236000000  | -0.024904000000 |
| C | -3.900596000000 | -0.864395000000 | -0.209274000000 |
| C | 3.560113000000  | 0.325734000000  | -0.031791000000 |
| H | -0.457676000000 | -2.635573000000 | 0.054181000000  |
| H | 1.766181000000  | -1.539251000000 | 0.003977000000  |
| H | -0.153793000000 | 2.320088000000  | 0.045019000000  |
| H | -2.367408000000 | 1.226621000000  | 0.118986000000  |

---

|   |                 |                 |                 |
|---|-----------------|-----------------|-----------------|
| H | 2.326681000000  | 1.862475000000  | -0.913382000000 |
| H | 2.357619000000  | 1.893375000000  | 0.838755000000  |
| H | -4.762070000000 | -1.525330000000 | -0.109428000000 |
| H | -3.882596000000 | -0.054631000000 | -0.944971000000 |
| H | 4.468499000000  | 0.946634000000  | -0.056040000000 |
| H | 3.614428000000  | -0.309700000000 | 0.866651000000  |
| H | 3.586034000000  | -0.336633000000 | -0.911813000000 |

**1a-H<sup>b</sup>**

|   |                 |                 |                 |
|---|-----------------|-----------------|-----------------|
| O | -2.727708000000 | -1.473148000000 | 0.048947000000  |
| C | -1.552690000000 | -0.798653000000 | 0.004219000000  |
| C | -0.380140000000 | -1.582192000000 | 0.037003000000  |
| C | 0.869801000000  | -0.989451000000 | -0.003643000000 |
| C | 1.020762000000  | 0.430691000000  | -0.079772000000 |
| C | -0.181761000000 | 1.195118000000  | -0.111674000000 |
| C | -1.438796000000 | 0.603229000000  | -0.071147000000 |
| C | 2.287290000000  | 1.062507000000  | -0.122229000000 |
| C | -3.939803000000 | -0.743555000000 | 0.021710000000  |
| C | 3.591170000000  | 0.333309000000  | -0.093128000000 |
| H | -0.486593000000 | -2.667721000000 | 0.095313000000  |
| H | 1.757124000000  | -1.624640000000 | 0.023339000000  |
| H | -0.109946000000 | 2.284553000000  | -0.170016000000 |
| H | -2.326320000000 | 1.235141000000  | -0.098473000000 |
| H | 2.300267000000  | 2.154964000000  | -0.180667000000 |
| H | -4.750615000000 | -1.481800000000 | 0.067029000000  |
| H | -4.023776000000 | -0.062364000000 | 0.886055000000  |
| H | -4.039456000000 | -0.155282000000 | -0.906793000000 |
| H | 4.441654000000  | 1.028646000000  | -0.132433000000 |
| H | 3.704664000000  | -0.280788000000 | 0.820557000000  |
| H | 3.694965000000  | -0.368255000000 | -0.942824000000 |

**2a-H<sup>c</sup>**

|   |                 |                 |                 |
|---|-----------------|-----------------|-----------------|
| C | 0.109656000000  | 0.659184000000  | 1.258793000000  |
| C | 0.750414000000  | -0.396137000000 | 0.573250000000  |
| C | -0.574019000000 | 0.570820000000  | 2.442922000000  |
| C | 0.582739000000  | -1.810374000000 | 1.066945000000  |
| O | 0.132221000000  | 1.948561000000  | 0.673281000000  |
| S | -1.050716000000 | 2.270307000000  | -0.409773000000 |
| O | -2.188292000000 | 2.871276000000  | 0.264545000000  |
| O | -1.211057000000 | 1.149760000000  | -1.325403000000 |
| C | -0.135680000000 | 3.651286000000  | -1.316209000000 |
| F | 0.535333000000  | 3.129254000000  | -2.330168000000 |
| F | -1.053111000000 | 4.488867000000  | -1.770713000000 |
| F | 0.690898000000  | 4.284376000000  | -0.503575000000 |



---

|   |                 |                 |                 |
|---|-----------------|-----------------|-----------------|
| C | 1.499833000000  | -0.236996000000 | -0.695478000000 |
| O | 1.608572000000  | -1.147377000000 | -1.497395000000 |
| O | 2.079282000000  | 0.955718000000  | -0.856087000000 |
| C | 3.707942000000  | 2.395436000000  | -1.849777000000 |
| C | 2.880897000000  | 1.144139000000  | -2.042389000000 |
| C | -0.828127000000 | -2.349096000000 | 0.887164000000  |
| C | -1.494756000000 | -2.199929000000 | -0.339017000000 |
| C | -2.788165000000 | -2.698778000000 | -0.508032000000 |
| C | -3.434924000000 | -3.354933000000 | 0.545422000000  |
| C | -2.777629000000 | -3.508120000000 | 1.769019000000  |
| C | -1.482933000000 | -3.005486000000 | 1.937561000000  |
| H | -1.060816000000 | 1.455199000000  | 2.854347000000  |
| H | -0.634685000000 | -0.366706000000 | 2.991649000000  |
| H | 1.285756000000  | -2.447278000000 | 0.512199000000  |
| H | 0.863301000000  | -1.871226000000 | 2.130015000000  |
| H | 4.324133000000  | 2.571327000000  | -2.744432000000 |
| H | 3.068141000000  | 3.275319000000  | -1.692840000000 |
| H | 4.377996000000  | 2.290583000000  | -0.982958000000 |
| H | 3.508008000000  | 0.252640000000  | -2.188796000000 |
| H | 2.204006000000  | 1.221695000000  | -2.907183000000 |
| H | -0.996575000000 | -1.683757000000 | -1.161331000000 |
| H | -3.295556000000 | -2.572583000000 | -1.467690000000 |
| H | -4.447811000000 | -3.742558000000 | 0.412878000000  |
| H | -3.273929000000 | -4.016983000000 | 2.599022000000  |
| H | -0.975548000000 | -3.125660000000 | 2.898739000000  |

**2a-H<sup>d</sup>**

|   |                 |                 |                 |
|---|-----------------|-----------------|-----------------|
| C | -0.080835000000 | 0.635260000000  | 0.831335000000  |
| C | 0.612683000000  | -0.330878000000 | 0.097070000000  |
| C | -0.873041000000 | 0.444251000000  | 2.076263000000  |
| C | 0.332823000000  | -1.710554000000 | 0.162197000000  |
| O | 0.036653000000  | 1.988395000000  | 0.471263000000  |
| S | -1.159758000000 | 2.699427000000  | -0.393114000000 |
| O | -1.144733000000 | 4.103542000000  | -0.039039000000 |
| O | -2.364306000000 | 1.881788000000  | -0.374223000000 |
| C | -0.446735000000 | 2.567816000000  | -2.128629000000 |
| F | -0.252556000000 | 1.290625000000  | -2.433541000000 |
| F | -1.320876000000 | 3.097790000000  | -2.968318000000 |
| F | 0.698670000000  | 3.226298000000  | -2.197155000000 |
| C | 1.798917000000  | 0.003889000000  | -0.773844000000 |
| O | 2.269697000000  | -0.776175000000 | -1.574651000000 |
| O | 2.306413000000  | 1.215417000000  | -0.549197000000 |
| C | 3.826872000000  | 3.014165000000  | -0.908462000000 |
| C | 3.419990000000  | 1.631148000000  | -1.364770000000 |

---

|   |                 |                 |                 |
|---|-----------------|-----------------|-----------------|
| C | -0.918992000000 | -2.352984000000 | 0.488808000000  |
| C | -2.173335000000 | -1.713847000000 | 0.321993000000  |
| C | -3.356896000000 | -2.388165000000 | 0.606214000000  |
| C | -3.327967000000 | -3.712977000000 | 1.062973000000  |
| C | -2.099093000000 | -4.368994000000 | 1.210207000000  |
| C | -0.911917000000 | -3.704205000000 | 0.914638000000  |
| H | -0.513770000000 | 1.173909000000  | 2.821779000000  |
| H | -0.757677000000 | -0.567333000000 | 2.479016000000  |
| H | -1.945782000000 | 0.643047000000  | 1.920772000000  |
| H | 1.145537000000  | -2.372810000000 | -0.145322000000 |
| H | 4.670689000000  | 3.373659000000  | -1.516359000000 |
| H | 2.991574000000  | 3.721325000000  | -1.017463000000 |
| H | 4.139787000000  | 3.002408000000  | 0.146703000000  |
| H | 4.233926000000  | 0.898528000000  | -1.253211000000 |
| H | 3.103415000000  | 1.618769000000  | -2.419475000000 |
| H | -2.212026000000 | -0.695391000000 | -0.066305000000 |
| H | -4.314099000000 | -1.881906000000 | 0.461059000000  |
| H | -4.260044000000 | -4.235970000000 | 1.288591000000  |
| H | -2.070160000000 | -5.406061000000 | 1.552416000000  |
| H | 0.045281000000  | -4.220031000000 | 1.023303000000  |

#### **H<sub>2</sub>(anchor)**

|   |                 |                 |                |
|---|-----------------|-----------------|----------------|
| H | -0.371371000000 | -0.006190000000 | 0.000000000000 |
| H | 0.371371000000  | 0.006190000000  | 0.000000000000 |

#### **H • (radical anchor)**

|   |                |                |                |
|---|----------------|----------------|----------------|
| H | 0.000000000000 | 0.000000000000 | 0.000000000000 |
|---|----------------|----------------|----------------|

## 11. Reference

- [1] D. Babinski, O. Soltani, D. E. Frantz, *Org. Lett.* **2008**, *10*, 2901-2904.
- [2] Gaussian 09, Revision B.01, M. J. Frisch, G. W. Trucks, H. B. Schlegel, G. E. Scuseria, M. A. Robb, J. R. Cheeseman, G. Scalmani, V. Barone, B. Mennucci, G. A. Petersson, H. Nakatsuji, M. Caricato, X. Li, H. P. Hratchian, A. F. Izmaylov, J. Bloino, G. Zheng, J. L. Sonnenberg, M. Hada, M. Ehara, K. Toyota, R. Fukuda, J. Hasegawa, M. Ishida, T. Nakajima, Y. Honda, O. Kitao, H. Nakai, T. Vreven, J. A. Montgomery, Jr., J. E. Peralta, F. Ogliaro, M. Bearpark, J. J. Heyd, E. Brothers, K. N. Kudin, V. N. Staroverov, T. Keith, R. Kobayashi, J. Normand, K. Raghavachari, A. Rendell, J. C. Burant, S. S. Iyengar, J. Tomasi, M. Cossi, N. Rega, J. M. Millam, M. Klene, J. E. Knox, J. B. Cross, V. Bakken, C. Adamo, J. Jaramillo, R. Gomperts, R. E. Stratmann, O. Yazyev, A. J. Austin, R. Cammi, C. Pomelli, J. W. Ochterski, R. L. Martin, K. Morokuma, V. G. Zakrzewski, G. A. Voth, P. Salvador, J. J. Dannenberg, S. Dapprich, A. D. Daniels, O. Farkas, J. B. Foresman, J. V. Ortiz, J. Cioslowski, and D. J. Fox, Gaussian, Inc.,

- 
- Wallingford CT, 2013.
- [3] a) A. D. Becke, *J. Chem. Phys.* **1993**, *98*, 5648-5652; b) W. Y. C. Lee, R. G. Parr, *Phys. Rev. B: Condens. Matter.* **1988**, *37*, 785-789.
- [4] S. Grimme, S. Ehrlich, L. Goerigk, *J. Comput. Chem.* **2011**, *32*, 1456-1465.
- [5] F. Weigend, R. Ahlrichs, *Phys. Chem. Chem. Phys.* **2005**, *7*, 3297-3305.
- [6] a) E. S. S. Miertus, *Chem. Phys.* **1981**, *55*, 13; b) J. T. S. Miertus, *Chem. Phys.* **1982**, *65*, 7; c) E. S. J. L. Pascual-Ahuir, I. Tunon, *J. Comput. Chem.* **1994**, *15*, 12.
- [7] Zhao, Y., Truhlar, D.G. *Theor. Chem. Acc.* **120**, 215–241 (2008).
- [8] M. Aleksandr V, C. Christopher J, T. Donald G, *J. Phys. Chem. B.* 2009, *113*, 6378-6396.
- [9] CYLview 1.0b; Legault, C. Y. Université de Sherbrooke, (<http://www.cylview.org>). (2009).
